# Supplementary material for: Transcriptome analysis reveals liver metabolism programming in kids from nutritional restricted goats during mid-gestation
Source: PeerJ. 2021 Jan 29;9:e10593. doi: 10.7717/peerj.10593 (PMC7849524; doi:10.7717/peerj.10593)
Supplement: Supplemental Information 3 [file peerj-09-10593-s003.xlsx]

## Sheet: Sheet1
Sample	No of valid reads	S1 Sequencing results and percentage of reads mapped to reference genome of all groups
KC2	43977698	No of reads Mapped	% of mapped reads	unmapped reads	Unique mapped reads	% of unique mapped reads	muti mapped reads
KC3	46582474	42519075	96.68	1458623	28135662	63.98	14383413
KC4	42584358	45078360	96.77	1504114	31050782	66.66	14027578
	44381510	41313441	97.02	1270917	28500182	66.93	12813259
KR1	43021828	42970292	96.8233	1411218	2.92289e+07	65.8567	1.37414e+07
KR2	55777950	41604922	96.71	1416906	25405157	59.05	16199765
KR3	55646050	53952936	96.73	1825014	36492221	65.42	17460715
KR4	46481724	53819538	96.72	1826512	38316486	68.86	15503052
	50231888	44048343	94.76	2433381	28859058	62.09	15189285
FC1	45233544	4.83564e+07	96.23	1.87545e+06	3.22682e+07	63.855	1.60882e+07
FC2	40623938	43807009	96.85	1426535	30648960	67.76	13158049
FC3	45274378	39328019	96.81	1295919	26711551	65.75	12616468
FC4	42614954	43700233	96.52	1574145	29780414	65.78	13919819
FC5	43899480	41125790	96.51	1489164	26883347	63.08	14242443
	4.35293e+07	42390863	96.56	1508617	27808204	63.35	14582659
FR1	50658246	4.20704e+07	96.65	1458876	2.83665e+07	65.144	1.37039e+07
FR2	48557270	48913427	96.56	1744819	29907117	59.04	19006310
FR4	40410192	46820975	96.42	1736295	31042218	63.93	15778757
FR5	42544634	39038477	96.61	1371715	26634607	65.91	12403870
	4.55426e+07	41159356	96.74	1385278	28133590	66.13	13025766
		4.39831e+07	96.5825	1.55953e+06	28929383	63.7525	1.50537e+07
