# Supplementary material for: Transcriptome analysis reveals liver metabolism programming in kids from nutritional restricted goats during mid-gestation
Source: PeerJ. 2021 Jan 29;9:e10593. doi: 10.7717/peerj.10593 (PMC7849524; doi:10.7717/peerj.10593)
Supplement: Supplemental Information 4 — Expressed genes of FC group, FR group, KC group, and KR group. [file peerj-09-10593-s004.xlsx]

## Sheet: FC
S2 List of expressed genes of goats in FC group.
gene_id	chr	start	end	strand	gene_name	transcript_id	GO	KEGG	KO_ENTRY	EC	Description	FPKM.FC1	FPKM.FC2	FPKM.FC3	FPKM.FC4	FPKM.FC5	FPKM_average
MSTRG.1719	chrNC_030810.1	111838236	111839503	-	APOA2	XM_005677161.2	GO:0002740(negative regulation of cytokine secretion involved in immune response);GO:0006457(protein folding);GO:0006656(phosphatidylcholine biosynthetic process);GO:0008035(high-density lipoprotein particle binding);GO:0008203(cholesterol metabolic process);GO:0009395(phospholipid catabolic process);GO:0009749(response to glucose);GO:0010873(positive regulation of cholesterol esterification);GO:…	03320(PPAR signaling pathway)	K08758	NA	PREDICTED: Capra hircus apolipoprotein A2 (APOA2), mRNA	19469.7	20214.3	22317.5	27105.7	31641.7	24149.8
MSTRG.6783	chrNC_030822.1	34026334	34058542	-	LOC102176710;LOC102176147	XM_005689816.3;MSTRG.6783.1;102176147	GO:0005344(oxygen transporter activity);GO:0005506(iron ion binding);GO:0005833(hemoglobin complex);GO:0015671(oxygen transport);GO:0019825(oxygen binding);GO:0020037(heme binding)	05144(Malaria);05143(African trypanosomiasis)	K13823	NA	PREDICTED: Capra hircus hemoglobin fetal subunit beta-like (LOC102176710), mRNA	21652.6	21580.7	25193.8	10862.3	18528.1	19563.5
MSTRG.3050	chrNC_030813.1	89001769	89019686	+	ALB	XM_005681744.2	GO:0003677(DNA binding);GO:0005504(fatty acid binding);GO:0005576(extracellular region);GO:0005615(extracellular space);GO:0006810(transport);GO:0008144(drug binding);GO:0009267(cellular response to starvation);GO:0015643(toxic substance binding);GO:0019825(oxygen binding);GO:0019836(hemolysis by symbiont of host erythrocytes);GO:0030170(pyridoxal phosphate binding);GO:0043066(negative regulation…	04390(Hippo signaling pathway)	K16144	NA	PREDICTED: Capra hircus albumin (ALB), mRNA	15238.7	19063.6	17933	12153.2	16005.8	16078.9
MSTRG.7	chrNC_005044.2	5329	6873	+	COX1	1485858	NA	NA	NA	NA		15423.7	11123.8	9541.42	13327.6	13339.5	12551.2
MSTRG.9744	chrNC_030828.1	58459066	58471068	-	LOC102185401	XM_013973155.2;XM_018066209.1	GO:0001948(glycoprotein binding);GO:0002020(protease binding);GO:0004867(serine-type endopeptidase inhibitor activity);GO:0005615(extracellular space);GO:0005783(endoplasmic reticulum);GO:0005794(Golgi apparatus);GO:0010951(negative regulation of endopeptidase activity);GO:0042802(identical protein binding);GO:0070062(extracellular exosome);GO:0070062(extracellular exosome)	04610(Complement and coagulation cascades);04610(Complement and coagulation cascades)	K03984	NA	PREDICTED: Capra hircus alpha-1-antiproteinase (LOC102185401), transcript variant X1, mRNA;PREDICTED: Capra hircus alpha-1-antiproteinase (LOC102185401), transcript variant X2, mRNA	8463.66	10401.1	9790.71	8598.02	11793.9	9809.49
MSTRG.225	chrNC_030808.1	80273479	80284027	-	AHSG	XM_005675161.3;MSTRG.225.4;MSTRG.225.3;MSTRG.225.1;MSTRG.225.2;MSTRG.225.6;MSTRG.225.5	GO:0006953(acute-phase response);GO:0030502(negative regulation of bone mineralization);GO:0050727(regulation of inflammatory response);GO:0050766(positive regulation of phagocytosis)	NA	NA	NA	PREDICTED: Capra hircus alpha 2-HS glycoprotein (AHSG), mRNA	9300.3	8876.21	9570.24	6519.99	6503.01	8153.95
MSTRG.1408	chrNC_030810.1	81701317	81702276	-		MSTRG.1408.1	NA	NA	NA	NA		232.373	7270.59	6339.47	9927.63	9585.91	6671.2
MSTRG.10839	chrNC_030832.1	160114	166574	+	HBM;LOC102168959;LOC102168680	XM_013974522.2;MSTRG.10839.1;MSTRG.10839.2;MSTRG.10839.3;XM_018040090.1;MSTRG.10839.5;XM_018040091.1	GO:0005344(oxygen transporter activity);GO:0005506(iron ion binding);GO:0005833(hemoglobin complex);GO:0015671(oxygen transport);GO:0019825(oxygen binding);GO:0020037(heme binding);GO:0070062(extracellular exosome);GO:0005515(protein binding);GO:0005515(protein binding)	05144(Malaria);05143(African trypanosomiasis);05143(African trypanosomiasis)	K13822	NA	PREDICTED: Capra hircus hemoglobin subunit mu (HBM), mRNA;PREDICTED: Capra hircus hemoglobin subunit alpha-1/2 (LOC102168680), mRNA;PREDICTED: Capra hircus hemoglobin subunit alpha-2-like (LOC102168959), mRNA	6484.46	6685.18	7474.65	4945.05	6465.09	6410.89
MSTRG.1409	chrNC_030810.1	81703815	81707976	-		MSTRG.1409.1	NA	NA	NA	NA		2276.89	4662.66	3594.13	5874.57	5952.45	4472.14
MSTRG.12	chrNC_005044.2	9878	11545	+	ND4L;ND4	1485864;1485865	NA	NA	NA	NA		6689.31	3267.64	2963.85	4174.68	4521.27	4323.35
MSTRG.5	chrNC_005044.2	3907	4948	+	ND2	1485857	NA	NA	NA	NA		3276.45	3236	3066.55	4098.92	5129.89	3761.56
MSTRG.16	chrNC_005044.2	15393	16643	+	CYTB	MSTRG.16.2;MSTRG.16.1	NA	NA	NA	NA		4555.94	2367.42	2249.01	3655.38	5031.46	3571.84
MSTRG.11	chrNC_005044.2	9462	9807	+	ND3	1485863	NA	NA	NA	NA		2488.76	2987.91	2780.64	4253.06	5178.27	3537.73
MSTRG.15	chrNC_005044.2	14153	15292	+	CYTB	1485868	NA	NA	NA	NA		8432.39	1752.18	1524.97	2557.82	2479.55	3349.38
MSTRG.3353	chrNC_030814.1	61282660	61290514	-		MSTRG.3353.1;MSTRG.3353.2	NA	NA	NA	NA		327.579	3149.92	2999.76	4741.42	4716.27	3186.99
MSTRG.103	chrNC_030808.1	54186089	54188262	+	LOC106503794	MSTRG.103.1;MSTRG.103.2;MSTRG.103.5;MSTRG.103.3;MSTRG.103.4	NA	NA	NA	NA		1688.18	278.993	5555.79	3680.17	3572.12	2955.05
MSTRG.12864	chrNW_017189992.1	6174	7975	-	LOC108634769	XM_018045005.1	GO:0005634(nucleus);GO:0005737(cytoplasm);GO:0005886(plasma membrane);GO:0005925(focal adhesion);GO:0008270(zinc ion binding);GO:0008285(negative regulation of cell proliferation);GO:0030054(cell junction);GO:0042127(regulation of cell proliferation);GO:0043234(protein complex);GO:0044822(poly(A) RNA binding);GO:0046872(metal ion binding)	NA	NA	NA	PREDICTED: Capra hircus collagen alpha-1(I) chain-like (LOC108634769), mRNA	2623.16	1851.29	2031.73	3962.29	4088.15	2911.33
MSTRG.8	chrNC_005044.2	7016	7699	+	COX2	1485859	NA	NA	NA	NA		4995.95	1890.99	1743.19	3136.98	2724.41	2898.3
MSTRG.6225	chrNC_030820.1	66023769	66026960	+	NNAT	XM_018057841.1;XM_018057842.1;XM_018057843.1;MSTRG.6225.4;MSTRG.6225.5;MSTRG.6225.6	GO:0005737(cytoplasm);GO:0007420(brain development);GO:0032024(positive regulation of insulin secretion);GO:0016021(integral component of membrane);GO:0016021(integral component of membrane)	NA	NA	NA	PREDICTED: Capra hircus neuronatin (NNAT), transcript variant X1, mRNA;PREDICTED: Capra hircus neuronatin (NNAT), transcript variant X2, mRNA;PREDICTED: Capra hircus neuronatin (NNAT), transcript variant X3, mRNA	2882.99	3112.2	2859.7	2043.9	3389.13	2857.59
MSTRG.7871	chrNC_030825.1	25393218	25395225	-	LOC102188618	XM_005692001.3	NA	NA	NA	NA	PREDICTED: Capra hircus metallothionein-1A (LOC102188618), mRNA	3990.58	2290.16	2716.86	3095.73	1656.39	2749.94
MSTRG.12962	chrNW_017195605.1	1772	4186	-	LOC102180517	MSTRG.12962.1;MSTRG.12962.6;MSTRG.12962.2;MSTRG.12962.4;MSTRG.12962.5;MSTRG.12962.3;XR_001917728.1	NA	NA	NA	NA	PREDICTED: Capra hircus uncharacterized LOC102180517 (LOC102180517), misc_RNA	3189.66	2926.15	2817.55	2268.22	2498.01	2739.92
MSTRG.3051	chrNC_030813.1	89027050	89048856	+	AFP	XM_005681745.2	GO:0001542(ovulation from ovarian follicle);GO:0005615(extracellular space);GO:0005737(cytoplasm);GO:0006810(transport);GO:0042448(progesterone metabolic process);GO:0046872(metal ion binding);GO:0060395(SMAD protein signal transduction)	04390(Hippo signaling pathway)	K16144	NA	PREDICTED: Capra hircus alpha fetoprotein (AFP), mRNA	1929.01	2440.08	2836.47	1992.88	4404.12	2720.51
MSTRG.8193	chrNC_030825.1	53692835	53697848	+	APOE	XM_018062563.1;XM_018062561.1;XM_018062562.1	GO:0005576(extracellular region);GO:0006869(lipid transport);GO:0008289(lipid binding);GO:0042157(lipoprotein metabolic process);GO:0042157(lipoprotein metabolic process)	05010(Alzheimer's disease);05010(Alzheimer's disease)	K04524	NA	PREDICTED: Capra hircus apolipoprotein E (APOE), transcript variant X3, mRNA;PREDICTED: Capra hircus apolipoprotein E (APOE), transcript variant X1, mRNA;PREDICTED: Capra hircus apolipoprotein E (APOE), transcript variant X2, mRNA	2993.78	2676.98	2622.04	2815.33	2360.46	2693.72
MSTRG.10705	chrNC_030831.1	25850576	25859280	-	TTR	XM_005697012.2	GO:0005179(hormone activity);GO:0005615(extracellular space);GO:0042572(retinol metabolic process);GO:0042802(identical protein binding);GO:0070062(extracellular exosome);GO:0070324(thyroid hormone binding);GO:0070327(thyroid hormone transport)	00230(Purine metabolism)	K07127	EC:3.5.2.17	PREDICTED: Capra hircus transthyretin (TTR), mRNA	1941.61	2791.86	2842.85	1944.74	2351.31	2374.48
MSTRG.10	chrNC_005044.2	7771	9392	+	ATP8;COX3;ATP6	1485860;MSTRG.10.2;1485861;MSTRG.10.4;1485862	NA	NA	NA	NA		4173.28	1018.85	1806.68	1429.92	2666.87	2219.12
MSTRG.4189	chrNC_030815.1	92614989	92671390	+		MSTRG.4189.1;MSTRG.4189.15;MSTRG.4189.11;MSTRG.4189.12;MSTRG.4189.9;MSTRG.4189.14;MSTRG.4189.2;MSTRG.4189.10;MSTRG.4189.7;MSTRG.4189.3;MSTRG.4189.5;MSTRG.4189.13;MSTRG.4189.6;MSTRG.4189.8;MSTRG.4189.4	NA	NA	NA	NA		494.63	1968.03	1787.69	3109.55	3455.84	2163.15
MSTRG.52	chrNC_030808.1	23870575	23872393	-		MSTRG.52.1	NA	NA	NA	NA		1589.98	2009.52	2067.31	2689.31	2147.39	2100.7
MSTRG.3	chrNC_005044.2	2742	3697	+	ND1	1485856	NA	NA	NA	NA		5966.54	891.054	784.688	1399.14	1447.08	2097.7
MSTRG.6910	chrNC_030822.1	54838323	54840368	+	APOA1	MSTRG.6910.1;XM_018059749.1	GO:0001540(beta-amyloid binding);GO:0001932(regulation of protein phosphorylation);GO:0001935(endothelial cell proliferation);GO:0002740(negative regulation of cytokine secretion involved in immune response);GO:0006656(phosphatidylcholine biosynthetic process);GO:0006695(cholesterol biosynthetic process);GO:0007186(G-protein coupled receptor signaling pathway);GO:0007229(integrin-mediated signali…	03320(PPAR signaling pathway);04975(Fat digestion and absorption);04977(Vitamin digestion and absorption);05143(African trypanosomiasis)	K08757	NA	PREDICTED: Capra hircus apolipoprotein A1 (APOA1), mRNA	1801.52	2085.36	2116.94	1636.34	1780.65	1884.16
MSTRG.8623	chrNC_030826.1	19683369	19686305	-	VTN	MSTRG.8623.1;XM_005693252.3	GO:0005044(scavenger receptor activity);GO:0005178(integrin binding);GO:0005578(proteinaceous extracellular matrix);GO:0006898(receptor-mediated endocytosis);GO:0006955(immune response);GO:0010811(positive regulation of cell-substrate adhesion);GO:0010951(negative regulation of endopeptidase activity);GO:0014911(positive regulation of smooth muscle cell migration);GO:0030198(extracellular matrix …	04151(PI3K-Akt signaling pathway);04512(ECM-receptor interaction);04510(Focal adhesion);04610(Complement and coagulation cascades);05205(Proteoglycans in cancer)	K06251	NA	PREDICTED: Capra hircus vitronectin (VTN), mRNA	1970.35	1909.03	2159.12	1478.69	1693.17	1842.07
MSTRG.4967	chrNC_030817.1	84822098	84904421	-	RPLP1	MSTRG.4967.1;XM_018053578.1	GO:0002181(cytoplasmic translation);GO:0003735(structural constituent of ribosome);GO:0005925(focal adhesion);GO:0006414(translational elongation);GO:0022625(cytosolic large ribosomal subunit);GO:0030295(protein kinase activator activity);GO:0030687(preribosome, large subunit precursor);GO:0032147(activation of protein kinase activity);GO:0045860(positive regulation of protein kinase activity);GO…	03010(Ribosome)	K02942	NA	PREDICTED: Capra hircus ribosomal protein lateral stalk subunit P1 (RPLP1), mRNA	1768.46	1778.1	1981.9	1501.22	2065.28	1818.99
MSTRG.4190	chrNC_030815.1	92671636	92672189	-		MSTRG.4190.1	NA	NA	NA	NA		303.461	1584.46	1461.9	2619.68	3043.72	1802.64
MSTRG.3044	chrNC_030813.1	87493717	87536317	-	GC	XM_018049559.1	GO:0003779(actin binding);GO:0005499(vitamin D binding);GO:0005615(extracellular space);GO:0051180(vitamin transport);GO:0051183(vitamin transporter activity)	NA	NA	NA	PREDICTED: Capra hircus GC, vitamin D binding protein (GC), mRNA	1901.57	1864.65	1938.2	1283.07	1440.82	1685.66
MSTRG.12079	chrNC_030836.1	40831663	40835588	-	FTH1	NM_001285609.1;MSTRG.12079.3;MSTRG.12079.2;MSTRG.12079.1	GO:0004322(ferroxidase activity);GO:0005623(cell);GO:0006826(iron ion transport);GO:0006879(cellular iron ion homeostasis);GO:0006955(immune response);GO:0008199(ferric iron binding);GO:0008285(negative regulation of cell proliferation);GO:0055114(oxidation-reduction process)	04978(Mineral absorption)	K00522	EC:1.16.3.2	Capra hircus ferritin heavy chain 1 (FTH1), mRNA	1714.88	1466.73	1469.56	1673.39	1762.19	1617.35
MSTRG.12945	chrNW_017191913.1	175	2330	+	LOC108634890	XR_001917716.1	GO:0005615(extracellular space)	04610(Complement and coagulation cascades)	K03913	NA	PREDICTED: Capra hircus uncharacterized LOC108634890 (LOC108634890), ncRNA	2344.81	1523.6	1453.64	1323.06	1368.87	1602.8
MSTRG.5840	chrNC_030819.1	71081543	71085653	+	TPT1	XM_018056766.1	GO:0005737(cytoplasm)	NA	NA	NA	PREDICTED: Capra hircus tumor protein, translationally-controlled 1 (TPT1), mRNA	1415.14	1587.52	1636.59	1246.4	1541.76	1485.48
MSTRG.4226	chrNC_030815.1	103011561	103037054	-	AMBP	XM_013966294.2;XM_005684341.3;MSTRG.4226.2;MSTRG.4226.8;MSTRG.4226.7;MSTRG.4226.5;MSTRG.4226.4;MSTRG.4226.6;MSTRG.4226.9;MSTRG.4226.10	GO:0004867(serine-type endopeptidase inhibitor activity);GO:0005886(plasma membrane);GO:0010951(negative regulation of endopeptidase activity);GO:0019862(IgA binding);GO:0020037(heme binding);GO:0036094(small molecule binding);GO:0042803(protein homodimerization activity);GO:0070062(extracellular exosome);GO:0072562(blood microparticle);GO:0072562(blood microparticle)	04610(Complement and coagulation cascades);04610(Complement and coagulation cascades)	K03909	NA	PREDICTED: Capra hircus alpha-1-microglobulin/bikunin precursor (AMBP), transcript variant X1, mRNA;PREDICTED: Capra hircus alpha-1-microglobulin/bikunin precursor (AMBP), transcript variant X2, mRNA	1266.05	1623.19	1468.45	1474.93	1297.43	1426.01
MSTRG.1	chrNC_005044.2	32	1024	.		MSTRG.1.1	NA	NA	NA	NA		1821.46	1391.77	1334.97	18.8911	2166.74	1346.77
MSTRG.11025	chrNC_030832.1	16275987	16281474	-	RPS15A	XM_005697526.3	GO:0003735(structural constituent of ribosome);GO:0005739(mitochondrion);GO:0006412(translation);GO:0008284(positive regulation of cell proliferation);GO:0009615(response to virus);GO:0016020(membrane);GO:0022627(cytosolic small ribosomal subunit);GO:0044822(poly(A) RNA binding);GO:0045787(positive regulation of cell cycle);GO:0070062(extracellular exosome)	03010(Ribosome)	K02957	NA	PREDICTED: Capra hircus ribosomal protein S15a (RPS15A), mRNA	1238.96	1391.69	1301.17	1034.89	1385.71	1270.48
MSTRG.10641	chrNC_030830.1	41231612	41236312	-	RPS18	NM_001285639.1	GO:0003735(structural constituent of ribosome);GO:0005634(nucleus);GO:0005829(cytosol);GO:0005925(focal adhesion);GO:0006412(translation);GO:0015935(small ribosomal subunit);GO:0016020(membrane);GO:0019843(rRNA binding);GO:0022627(cytosolic small ribosomal subunit);GO:0042254(ribosome biogenesis);GO:0044822(poly(A) RNA binding);GO:0070062(extracellular exosome)	03010(Ribosome)	K02964	NA	Capra hircus ribosomal protein S18 (RPS18), mRNA	1164.5	1273.81	1234.63	1237.09	1349.2	1251.85
MSTRG.1053	chrNC_030810.1	7052998	7080042	-	SPP2	XM_005678749.3	GO:0046849(bone remodeling);GO:0070062(extracellular exosome)	NA	NA	NA	PREDICTED: Capra hircus secreted phosphoprotein 2 (SPP2), mRNA	994.398	1196.63	1206.51	1405.88	1257.5	1212.18
MSTRG.4787	chrNC_030817.1	60400653	60402483	+	RPS29	XM_005685625.2	GO:0003735(structural constituent of ribosome);GO:0008270(zinc ion binding);GO:0022627(cytosolic small ribosomal subunit)	03010(Ribosome)	K02980	NA	PREDICTED: Capra hircus ribosomal protein S29 (RPS29), mRNA	1237.6	1398.81	1335.79	809.211	1139.3	1184.14
MSTRG.2119	chrNC_030811.1	108562826	108575497	-	PEG10	NM_001291298.1;NM_001291300.1	GO:0003676(nucleic acid binding);GO:0008270(zinc ion binding);GO:0008270(zinc ion binding)	NA	NA	NA	Capra hircus paternally expressed 10 (PEG10), transcript variant 2, mRNA;Capra hircus paternally expressed 10 (PEG10), transcript variant 1, mRNA	1243.77	1278.5	1214.39	992.694	1126.82	1171.24
MSTRG.10108	chrNC_030829.1	50828681	50829851	+	GPX1	XM_005695962.3	GO:0004602(glutathione peroxidase activity);GO:0005737(cytoplasm);GO:0006749(glutathione metabolic process);GO:0006979(response to oxidative stress);GO:0042744(hydrogen peroxide catabolic process);GO:0055114(oxidation-reduction process);GO:1902905(positive regulation of fibril organization)	00590(Arachidonic acid metabolism);00480(Glutathione metabolism);04918(Thyroid hormone synthesis)	K00432	EC:1.11.1.9	PREDICTED: Capra hircus glutathione peroxidase 1 (GPX1), mRNA	1095.54	1264.47	1414.31	599.786	1339.99	1142.82
MSTRG.224	chrNC_030808.1	80226559	80241580	-	FETUB	XM_005675160.3;MSTRG.224.2;MSTRG.224.1	GO:0004869(cysteine-type endopeptidase inhibitor activity);GO:0005576(extracellular region);GO:0005615(extracellular space);GO:0007338(single fertilization);GO:0007339(binding of sperm to zona pellucida);GO:0008191(metalloendopeptidase inhibitor activity);GO:0010951(negative regulation of endopeptidase activity);GO:0070062(extracellular exosome)	NA	NA	NA	PREDICTED: Capra hircus fetuin B (FETUB), mRNA	595.794	1596.62	1547.89	425.21	1228.98	1078.9
MSTRG.9749	chrNC_030828.1	58690887	58726294	+	LOC102174166;LOC102186111	XM_018066461.1;MSTRG.9749.1;XM_018066462.1;MSTRG.9749.3;MSTRG.9749.4;XM_018066463.1	GO:0004867(serine-type endopeptidase inhibitor activity);GO:0005615(extracellular space);GO:0010951(negative regulation of endopeptidase activity);GO:0031410(cytoplasmic vesicle);GO:0042583(chromaffin granule);GO:0042583(chromaffin granule)	04610(Complement and coagulation cascades);04610(Complement and coagulation cascades)	K03984	NA	PREDICTED: Capra hircus serpin A3-5 (LOC102174166), transcript variant X1, mRNA;PREDICTED: Capra hircus serpin A3-5 (LOC102174166), transcript variant X2, mRNA;PREDICTED: Capra hircus serpin A3-6 (LOC102186111), mRNA	1946.21	1085.11	1111.53	570.632	676.441	1077.98
MSTRG.3351	chrNC_030814.1	61281740	61282401	+		MSTRG.3351.1	NA	NA	NA	NA		253.88	866.082	867.315	1074.74	1879.61	988.326
MSTRG.11574	chrNC_030833.1	36491826	36498459	+	RBP4	XM_018041094.1;NM_001314229.1	GO:0001654(eye development);GO:0005215(transporter activity);GO:0005615(extracellular space);GO:0006094(gluconeogenesis);GO:0006810(transport);GO:0019841(retinol binding);GO:0030277(maintenance of gastrointestinal epithelium);GO:0032024(positive regulation of insulin secretion);GO:0032526(response to retinoic acid);GO:0042572(retinol metabolic process);GO:0042593(glucose homeostasis);GO:0070062(e…	NA	NA	NA	PREDICTED: Capra hircus retinol binding protein 4 (RBP4), transcript variant X1, mRNA;Capra hircus retinol binding protein 4 (RBP4), mRNA	1113.46	1193.13	1182.39	645.448	761.731	979.232
MSTRG.9572	chrNC_030828.1	22130235	22133544	-	RPS17	XM_005695007.2	GO:0000028(ribosomal small subunit assembly);GO:0022627(cytosolic small ribosomal subunit)	03010(Ribosome)	K02962	NA	PREDICTED: Capra hircus ribosomal protein S17 (RPS17), mRNA	884.564	1056.25	1112.39	718.649	1055.73	965.517
MSTRG.395	chrNC_030808.1	135138133	135177945	-	LOC102172205	XM_005675551.3	GO:0001895(retina homeostasis);GO:0005769(early endosome);GO:0005770(late endosome);GO:0005905(clathrin-coated pit);GO:0006879(cellular iron ion homeostasis);GO:0008198(ferrous iron binding);GO:0008199(ferric iron binding);GO:0009925(basal plasma membrane);GO:0015091(ferric iron transmembrane transporter activity);GO:0015682(ferric iron transport);GO:0016324(apical plasma membrane);GO:0030139(end…	04066(HIF-1 signaling pathway);04978(Mineral absorption)	K14736	NA	PREDICTED: Capra hircus serotransferrin (LOC102172205), mRNA	1066.91	1130.17	1232.99	677.544	697.772	961.077
MSTRG.6471	chrNC_030821.1	58802201	58803767	+	RPS20	XM_013969227.2	GO:0003735(structural constituent of ribosome);GO:0006412(translation);GO:0016020(membrane);GO:0022627(cytosolic small ribosomal subunit);GO:0044822(poly(A) RNA binding);GO:0070062(extracellular exosome)	03010(Ribosome)	K02969	NA	PREDICTED: Capra hircus ribosomal protein S20 (RPS20), mRNA	993.786	981.883	987.19	653.108	978.464	918.886
MSTRG.4987	chrNC_030817.1	87909706	87914418	+	RPL4	XM_005685131.3	GO:0003735(structural constituent of ribosome);GO:0022625(cytosolic large ribosomal subunit)	03010(Ribosome)	K02930	NA	PREDICTED: Capra hircus ribosomal protein L4 (RPL4), mRNA	854.043	982.363	908.193	868.71	912.292	905.12
MSTRG.8944	chrNC_030826.1	39092676	39096584	-	RPL23	XM_005693732.2	GO:0003735(structural constituent of ribosome);GO:0005730(nucleolus);GO:0005925(focal adhesion);GO:0006412(translation);GO:0016020(membrane);GO:0022625(cytosolic large ribosomal subunit);GO:0044822(poly(A) RNA binding);GO:0070062(extracellular exosome);GO:0070180(large ribosomal subunit rRNA binding)	03010(Ribosome)	K02894	NA	PREDICTED: Capra hircus ribosomal protein L23 (RPL23), mRNA	904.755	947.758	926.16	699.233	976.639	890.909
MSTRG.53	chrNC_030808.1	23870882	23872393	+		MSTRG.53.1	NA	NA	NA	NA		1895.14	2402.58	0	2.71738	143.05	888.697
MSTRG.8946	chrNC_030826.1	39340519	39344251	+	RPL19	XM_005693740.3	GO:0003735(structural constituent of ribosome);GO:0006412(translation);GO:0022625(cytosolic large ribosomal subunit)	03010(Ribosome)	K02885	NA	PREDICTED: Capra hircus ribosomal protein L19 (RPL19), mRNA	872.44	918.161	882.498	827.58	936.809	887.498
MSTRG.10838	chrNC_030832.1	158745	169169	-	LOC102168680;LOC102186172;LOC102168959	MSTRG.10838.1;MSTRG.10838.2;MSTRG.10838.3;MSTRG.10838.4;MSTRG.10838.5	NA	NA	NA	NA		1063.04	952.672	1099.32	560.858	744.285	884.035
MSTRG.5103	chrNC_030818.1	5903533	5908658	+	RPL31	XM_005701764.3	GO:0002181(cytoplasmic translation);GO:0003735(structural constituent of ribosome);GO:0022625(cytosolic large ribosomal subunit)	03010(Ribosome)	K02910	NA	PREDICTED: Capra hircus ribosomal protein L31 (RPL31), mRNA	784.676	742.636	761.599	910.747	918.22	823.576
MSTRG.9287	chrNC_030826.1	61754612	61767273	-	APOH	XM_005694476.3;XM_005694477.3	GO:0005576(extracellular region);GO:0008201(heparin binding);GO:0008201(heparin binding)	04514(Cell adhesion molecules (CAMs));04514(Cell adhesion molecules (CAMs))	K06496	NA	PREDICTED: Capra hircus apolipoprotein H (APOH), transcript variant X1, mRNA;PREDICTED: Capra hircus apolipoprotein H (APOH), transcript variant X2, mRNA	928.203	960.247	997.41	474.964	750.54	822.273
MSTRG.11160	chrNC_030832.1	27413903	27419786	+	AHSP	XM_005697739.3;XM_013974860.2;XM_013974859.2;MSTRG.11160.4	GO:0005737(cytoplasm);GO:0006457(protein folding);GO:0030218(erythrocyte differentiation);GO:0030492(hemoglobin binding);GO:0050821(protein stabilization);GO:0050821(protein stabilization)	NA	NA	NA	PREDICTED: Capra hircus alpha hemoglobin stabilizing protein (AHSP), transcript variant X3, mRNA;PREDICTED: Capra hircus alpha hemoglobin stabilizing protein (AHSP), transcript variant X2, mRNA;PREDICTED: Capra hircus alpha hemoglobin stabilizing protein (AHSP), transcript variant X1, mRNA	665.432	818.921	946.764	789.478	852.784	814.676
MSTRG.4251	chrNC_030815.1	110690148	110695344	-	RPS7	XM_018052720.1	GO:0003735(structural constituent of ribosome);GO:0005730(nucleolus);GO:0005815(microtubule organizing center);GO:0005925(focal adhesion);GO:0006364(rRNA processing);GO:0006412(translation);GO:0016020(membrane);GO:0022627(cytosolic small ribosomal subunit);GO:0030686(90S preribosome);GO:0032040(small-subunit processome);GO:0042274(ribosomal small subunit biogenesis);GO:0044822(poly(A) RNA binding…	03010(Ribosome)	K02993	NA	PREDICTED: Capra hircus ribosomal protein S7 (RPS7), mRNA	873.627	804.499	877.802	636.592	877.964	814.097
MSTRG.6814	chrNC_030822.1	38508121	38510979	+	RPL27A	XM_005689717.3	GO:0003735(structural constituent of ribosome);GO:0006412(translation);GO:0022625(cytosolic large ribosomal subunit)	03010(Ribosome)	K02900	NA	PREDICTED: Capra hircus ribosomal protein L27a (RPL27A), mRNA	836.497	820.564	818.889	776.384	812.247	812.916
MSTRG.2936	chrNC_030813.1	45531184	45531615	-		MSTRG.2936.1	NA	NA	NA	NA		15.4288	232.076	520.499	734.64	2518.94	804.317
MSTRG.5479	chrNC_030818.1	95366892	95371219	-	RPL35	XM_005687128.3	GO:0000463(maturation of LSU-rRNA from tricistronic rRNA transcript (SSU-rRNA, 5.8S rRNA, LSU-rRNA));GO:0003729(mRNA binding);GO:0003735(structural constituent of ribosome);GO:0006412(translation);GO:0022625(cytosolic large ribosomal subunit)	03010(Ribosome)	K02918	NA	PREDICTED: Capra hircus ribosomal protein L35 (RPL35), mRNA	800.947	801.502	784.643	715.014	912.051	802.831
MSTRG.12980	chrNW_017199520.1	10157	11172	-	LOC102175427	XM_005691668.3	GO:0000028(ribosomal small subunit assembly);GO:0003735(structural constituent of ribosome);GO:0005055(laminin receptor activity);GO:0005634(nucleus);GO:0005886(plasma membrane);GO:0006412(translation);GO:0007155(cell adhesion);GO:0022627(cytosolic small ribosomal subunit);GO:0043236(laminin binding)	03010(Ribosome)	K02998	NA	PREDICTED: Capra hircus 40S ribosomal protein SA (LOC102175427), mRNA	981.524	783.967	877.15	520.581	736.99	780.043
MSTRG.9384	chrNC_030827.1	33645155	33647890	+	RPL37	XM_005709429.3	GO:0003723(RNA binding);GO:0003735(structural constituent of ribosome);GO:0006412(translation);GO:0019843(rRNA binding);GO:0022625(cytosolic large ribosomal subunit);GO:0046872(metal ion binding)	03010(Ribosome)	K02922	NA	PREDICTED: Capra hircus ribosomal protein L37 (RPL37), mRNA	814.242	897.601	832.477	622.568	721.851	777.748
MSTRG.8462	chrNC_030825.1	65497752	65554788	-	LOC102189516	XM_018063491.1;MSTRG.8462.1;XM_018063490.1;MSTRG.8462.5;MSTRG.8462.6;MSTRG.8462.4;MSTRG.8462.7;MSTRG.8462.10;MSTRG.8462.8;MSTRG.8462.9	NA	NA	NA	NA	PREDICTED: Capra hircus uncharacterized LOC102189516 (LOC102189516), transcript variant X2, mRNA;PREDICTED: Capra hircus uncharacterized LOC102189516 (LOC102189516), transcript variant X1, mRNA	757.468	994.469	631.061	523.634	891.377	759.602
MSTRG.5241	chrNC_030818.1	37569829	37572266	+	RPS27A	XM_005686612.3	GO:0003735(structural constituent of ribosome);GO:0005840(ribosome);GO:0006412(translation)	03010(Ribosome)	K02977	NA	PREDICTED: Capra hircus ribosomal protein S27a (RPS27A), mRNA	777.071	825.246	866.017	559.42	758.415	757.234
MSTRG.12650	chrNW_017189549.1	37723	38859	.		MSTRG.12650.1	NA	NA	NA	NA		19.4547	487.698	640.91	1815.08	821.885	757.006
MSTRG.7873	chrNC_030825.1	25403998	25405407	-	LOC102188339	XR_001296756.2	NA	NA	NA	NA	PREDICTED: Capra hircus metallothionein-1C (LOC102188339), ncRNA	1212.75	477.466	733.397	964.401	353.7	748.342
MSTRG.5306	chrNC_030818.1	49607118	49608212	-	TMSB10	XM_018055389.1	GO:0003785(actin monomer binding);GO:0005737(cytoplasm);GO:0005856(cytoskeleton);GO:0007015(actin filament organization)	04810(Regulation of actin cytoskeleton)	K05764	NA	PREDICTED: Capra hircus thymosin beta 10 (TMSB10), mRNA	919.669	597.006	676.785	838.271	630.757	732.498
MSTRG.56	chrNC_030808.1	23877262	23879382	-		MSTRG.56.1;MSTRG.56.2	NA	NA	NA	NA		150.459	676.846	596.034	963.915	1233.72	724.195
MSTRG.10618	chrNC_030830.1	40202299	40209216	+	RPS10	NM_001286087.1	GO:0000028(ribosomal small subunit assembly);GO:0003735(structural constituent of ribosome);GO:0005730(nucleolus);GO:0022627(cytosolic small ribosomal subunit)	03010(Ribosome)	K02947	NA	Capra hircus ribosomal protein S10 (RPS10), mRNA	844.306	706.821	721.212	567.487	769.862	721.938
MSTRG.3820	chrNC_030814.1	103514145	103517594	+	RPL18A	XM_018051404.1	GO:0003735(structural constituent of ribosome);GO:0006412(translation);GO:0016020(membrane);GO:0022625(cytosolic large ribosomal subunit);GO:0044822(poly(A) RNA binding)	03010(Ribosome)	K02882	NA	PREDICTED: Capra hircus ribosomal protein L18a (RPL18A), mRNA	778.211	665.341	733.324	655.318	773.28	721.095
MSTRG.3933	chrNC_030815.1	11018421	11036104	+	LOC102182127	XM_018051875.1	GO:0005615(extracellular space);GO:0005634(nucleus);GO:0005783(endoplasmic reticulum);GO:0005829(cytosol);GO:0016887(ATPase activity);GO:0031012(extracellular matrix);GO:0031625(ubiquitin protein ligase binding);GO:0031966(mitochondrial membrane);GO:0032436(positive regulation of proteasomal ubiquitin-dependent protein catabolic process);GO:0032463(negative regulation of protein homooligomerizati…	04610(Complement and coagulation cascades)	K17252	NA	PREDICTED: Capra hircus clusterin (LOC102182127), mRNA	878.649	749.333	708.91	535.684	695.492	713.614
MSTRG.10182	chrNC_030829.1	56322333	56326488	+	RPL32	XM_018067093.1	GO:0003735(structural constituent of ribosome);GO:0006412(translation);GO:0022625(cytosolic large ribosomal subunit)	03010(Ribosome)	K02912	NA	PREDICTED: Capra hircus ribosomal protein L32 (RPL32), mRNA	716.022	706.198	706.711	648.654	788.968	713.311
MSTRG.4188	chrNC_030815.1	92604577	92671382	-		MSTRG.4188.1;MSTRG.4188.2;MSTRG.4188.3;MSTRG.4188.4;MSTRG.4188.5	NA	NA	NA	NA		581.266	607.722	644.824	833.976	880.592	709.676
MSTRG.3586	chrNC_030814.1	91913895	91915409	+	RPL36	XM_018050912.1;XM_013965249.2;MSTRG.3586.3;XM_018050913.1	GO:0002181(cytoplasmic translation);GO:0003735(structural constituent of ribosome);GO:0022625(cytosolic large ribosomal subunit);GO:0022625(cytosolic large ribosomal subunit)	03010(Ribosome);03010(Ribosome)	K02920	NA	PREDICTED: Capra hircus ribosomal protein L36 (RPL36), transcript variant X1, mRNA;PREDICTED: Capra hircus ribosomal protein L36 (RPL36), transcript variant X3, mRNA;PREDICTED: Capra hircus ribosomal protein L36 (RPL36), transcript variant X2, mRNA	628.156	601.974	594.726	755.921	857.688	687.693
MSTRG.8640	chrNC_030826.1	19975333	19978239	+	RPL23A	XM_005693265.3	GO:0000027(ribosomal large subunit assembly);GO:0000166(nucleotide binding);GO:0003735(structural constituent of ribosome);GO:0005730(nucleolus);GO:0006412(translation);GO:0008283(cell proliferation);GO:0022625(cytosolic large ribosomal subunit);GO:0044822(poly(A) RNA binding);GO:0070062(extracellular exosome)	03010(Ribosome)	K02893	NA	PREDICTED: Capra hircus ribosomal protein L23a (RPL23A), mRNA	732.246	674.789	716.643	611.961	612.662	669.66
MSTRG.10060	chrNC_030829.1	49035712	49037993	+	RPL29	XM_018066911.1	GO:0002181(cytoplasmic translation);GO:0003735(structural constituent of ribosome);GO:0016020(membrane);GO:0022625(cytosolic large ribosomal subunit);GO:0044822(poly(A) RNA binding)	03010(Ribosome)	K02905	NA	PREDICTED: Capra hircus ribosomal protein L29 (RPL29), mRNA	683.949	661.234	628.827	519.381	814.067	661.492
MSTRG.8835	chrNC_030826.1	32927975	32929843	-	UBB	MSTRG.8835.1;XM_005693600.3	GO:0005704(polytene chromosome band);GO:0005875(microtubule associated complex);GO:0006464(cellular protein modification process);GO:0006511(ubiquitin-dependent protein catabolic process);GO:0016567(protein ubiquitination);GO:0031386(protein tag)	03320(PPAR signaling pathway)	K08770	NA	PREDICTED: Capra hircus ubiquitin B (UBB), mRNA	713.977	791.173	779.849	484.917	537.056	661.394
MSTRG.8447	chrNC_030825.1	64780137	64786813	-	RPS9	XM_018063498.1;XM_018063497.1	GO:0003735(structural constituent of ribosome);GO:0005730(nucleolus);GO:0005925(focal adhesion);GO:0006412(translation);GO:0008284(positive regulation of cell proliferation);GO:0016020(membrane);GO:0019843(rRNA binding);GO:0022627(cytosolic small ribosomal subunit);GO:0030529(intracellular ribonucleoprotein complex);GO:0044822(poly(A) RNA binding);GO:0045182(translation regulator activity);GO:004…	03010(Ribosome);03010(Ribosome)	K02997	NA	PREDICTED: Capra hircus ribosomal protein S9 (RPS9), transcript variant X2, mRNA;PREDICTED: Capra hircus ribosomal protein S9 (RPS9), transcript variant X1, mRNA	651.728	604.173	640.496	664.397	695.454	651.25
MSTRG.8291	chrNC_030825.1	56950245	56953827	+	RPL13A	XM_018062788.1	GO:0003729(mRNA binding);GO:0003735(structural constituent of ribosome);GO:0006412(translation);GO:0017148(negative regulation of translation);GO:0022625(cytosolic large ribosomal subunit);GO:0097452(GAIT complex);GO:1901194(negative regulation of formation of translation preinitiation complex)	03010(Ribosome)	K02872	NA	PREDICTED: Capra hircus ribosomal protein L13a (RPL13A), mRNA	692.798	689.981	658.862	521.285	692.428	651.071
MSTRG.7827	chrNC_030825.1	15891288	15894637	+	RPL13	MSTRG.7827.1;XM_018061891.1	GO:0003723(RNA binding);GO:0003735(structural constituent of ribosome);GO:0006412(translation);GO:0022625(cytosolic large ribosomal subunit)	03010(Ribosome)	K02873	NA	PREDICTED: Capra hircus ribosomal protein L13 (RPL13), mRNA	732.113	636.973	696.035	498.524	664.744	645.678
MSTRG.6909	chrNC_030822.1	54796233	54858012	-	APOC3;SIK3	MSTRG.6909.1;MSTRG.6909.2;MSTRG.6909.3;MSTRG.6909.4;MSTRG.6909.5;XM_005689483.3;MSTRG.6909.6	GO:0005543(phospholipid binding);GO:0006869(lipid transport);GO:0007186(G-protein coupled receptor signaling pathway);GO:0010897(negative regulation of triglyceride catabolic process);GO:0010903(negative regulation of very-low-density lipoprotein particle remodeling);GO:0010916(negative regulation of very-low-density lipoprotein particle clearance);GO:0010987(negative regulation of high-density l…	03320(PPAR signaling pathway)	K08759	NA	PREDICTED: Capra hircus apolipoprotein C3 (APOC3), mRNA	637.149	559.037	665.516	737.249	620.33	643.856
MSTRG.5494	chrNC_030818.1	97723602	97727826	-	RPL12	XM_005687157.3	GO:0000027(ribosomal large subunit assembly);GO:0003735(structural constituent of ribosome);GO:0005730(nucleolus);GO:0005925(focal adhesion);GO:0006412(translation);GO:0016020(membrane);GO:0019843(rRNA binding);GO:0022625(cytosolic large ribosomal subunit);GO:0044822(poly(A) RNA binding);GO:0070062(extracellular exosome)	03010(Ribosome)	K02870	NA	PREDICTED: Capra hircus ribosomal protein L12 (RPL12), mRNA	642.655	618.732	621.902	510.919	680.442	614.93
MSTRG.8112	chrNC_030825.1	50677048	50694794	-	BLVRB	XM_018062427.1	GO:0004074(biliverdin reductase activity);GO:0005654(nucleoplasm);GO:0005829(cytosol);GO:0005886(plasma membrane);GO:0042167(heme catabolic process);GO:0042602(riboflavin reductase (NADPH) activity);GO:0055114(oxidation-reduction process);GO:0070062(extracellular exosome)	00740(Riboflavin metabolism);00860(Porphyrin and chlorophyll metabolism)	K05901	EC:1.3.1.24;EC:1.5.1.30	PREDICTED: Capra hircus biliverdin reductase B (BLVRB), mRNA	507.742	562.256	668.294	686.689	631.391	611.274
MSTRG.8266	chrNC_030825.1	56288135	56291940	-	RPL18	XM_005692683.3	GO:0003723(RNA binding);GO:0003735(structural constituent of ribosome);GO:0005730(nucleolus);GO:0005925(focal adhesion);GO:0006412(translation);GO:0016020(membrane);GO:0022625(cytosolic large ribosomal subunit)	03010(Ribosome)	K02883	NA	PREDICTED: Capra hircus ribosomal protein L18 (RPL18), mRNA	602.746	531.473	589.217	614.987	685.385	604.761
MSTRG.6431	chrNC_030821.1	42833037	42833555	+	LOC102175871	XM_013969355.2	GO:0000166(nucleotide binding);GO:0000462(maturation of SSU-rRNA from tricistronic rRNA transcript (SSU-rRNA, 5.8S rRNA, LSU-rRNA));GO:0003735(structural constituent of ribosome);GO:0006412(translation);GO:0022627(cytosolic small ribosomal subunit)	03010(Ribosome)	K02974	NA	PREDICTED: Capra hircus 40S ribosomal protein S24 (LOC102175871), mRNA	632.071	589.922	622.109	512.25	647.654	600.801
MSTRG.6099	chrNC_030820.1	56669812	56673350	+	ATP5E	XM_005688298.2	GO:0000275(mitochondrial proton-transporting ATP synthase complex, catalytic core F(1));GO:0005743(mitochondrial inner membrane);GO:0005753(mitochondrial proton-transporting ATP synthase complex);GO:0015986(ATP synthesis coupled proton transport);GO:0016887(ATPase activity);GO:0046933(proton-transporting ATP synthase activity, rotational mechanism);GO:0046961(proton-transporting ATPase activity, …	00190(Oxidative phosphorylation);05010(Alzheimer's disease);05012(Parkinson's disease);05016(Huntington's disease)	K02135	NA	PREDICTED: Capra hircus ATP synthase, H+ transporting, mitochondrial F1 complex, epsilon subunit (ATP5E), mRNA	535.877	530.635	772.647	517.734	639.808	599.34
MSTRG.8812	chrNC_030826.1	27715313	27720711	-	RPL26	XM_005693558.3	GO:0002181(cytoplasmic translation);GO:0003735(structural constituent of ribosome);GO:0022625(cytosolic large ribosomal subunit);GO:0042273(ribosomal large subunit biogenesis)	03010(Ribosome)	K02898	NA	PREDICTED: Capra hircus ribosomal protein L26 (RPL26), mRNA	560.613	637.072	629.963	491.9	609.357	585.781
MSTRG.2645	chrNC_030812.1	102789728	102794465	-	GAPDH	XM_005680968.3	GO:0000226(microtubule cytoskeleton organization);GO:0004365(glyceraldehyde-3-phosphate dehydrogenase (NAD+) (phosphorylating) activity);GO:0005515(protein binding);GO:0005634(nucleus);GO:0005737(cytoplasm);GO:0005829(cytosol);GO:0006006(glucose metabolic process);GO:0006096(glycolytic process);GO:0006417(regulation of translation);GO:0008017(microtubule binding);GO:0015630(microtubule cytoskelet…	01200(Carbon metabolism);01230(Biosynthesis of amino acids);00010(Glycolysis / Gluconeogenesis);04066(HIF-1 signaling pathway);05010(Alzheimer's disease)	K00134	EC:1.2.1.12	PREDICTED: Capra hircus glyceraldehyde-3-phosphate dehydrogenase (GAPDH), mRNA	643.403	501.019	581.349	538.675	621.125	577.114
MSTRG.3350	chrNC_030814.1	61280097	61281192	-		MSTRG.3350.1	NA	NA	NA	NA		263.275	623.875	479.465	773.392	740.128	576.027
MSTRG.55	chrNC_030808.1	23877262	23879382	+		MSTRG.55.1	NA	NA	NA	NA		0.898259	676.846	0	963.905	1233.72	575.074
MSTRG.13067	chrNW_017215042.1	6211	6746	+		MSTRG.13067.1	NA	NA	NA	NA		172.262	443.8	409.508	837.367	988.216	570.231
MSTRG.1825	chrNC_030811.1	7917258	7921040	+	RARRES2	XM_018046618.1;XM_018046622.1;XM_018046626.1;XM_018046621.1;XM_018046625.1;XM_018046619.1;XM_018046623.1;XM_018046620.1;XM_013963442.2;NM_001312693.1	GO:0001523(retinoid metabolic process);GO:0001701(in utero embryonic development);GO:0001934(positive regulation of protein phosphorylation);GO:0005102(receptor binding);GO:0006954(inflammatory response);GO:0010759(positive regulation of macrophage chemotaxis);GO:0031012(extracellular matrix);GO:0045600(positive regulation of fat cell differentiation);GO:0048566(embryonic digestive tract developm…	NA	NA	NA	PREDICTED: Capra hircus retinoic acid receptor responder 2 (RARRES2), transcript variant X1, mRNA;PREDICTED: Capra hircus retinoic acid receptor responder 2 (RARRES2), transcript variant X5, mRNA;PREDICTED: Capra hircus retinoic acid receptor responder 2 (RARRES2), transcript variant X9, mRNA;PREDICTED: Capra hircus retinoic acid receptor responder 2 (RARRES2), transcript variant X4, mRNA;PREDICT…	701.804	578.765	544.217	534.824	476.174	567.157
MSTRG.1405	chrNC_030810.1	81708333	81709619	-		MSTRG.1405.1	NA	NA	NA	NA		450.533	546.068	116.146	739.616	948.361	560.145
MSTRG.9922	chrNC_030829.1	13153142	13156751	+	RPL14	XM_018067105.1	GO:0003735(structural constituent of ribosome);GO:0006364(rRNA processing);GO:0006412(translation);GO:0016020(membrane);GO:0022625(cytosolic large ribosomal subunit);GO:0042273(ribosomal large subunit biogenesis);GO:0044822(poly(A) RNA binding);GO:0070062(extracellular exosome)	03010(Ribosome)	K02875	NA	PREDICTED: Capra hircus ribosomal protein L14 (RPL14), mRNA	591.863	602.343	553.715	455.602	577.705	556.246
MSTRG.2931	chrNC_030813.1	45529111	45530584	.		MSTRG.2931.1	NA	NA	NA	NA		11.3808	745.982	370.135	708.038	939.482	555.004
MSTRG.8475	chrNC_030825.1	67086726	67092345	+	RPS5	XM_005693032.3	GO:0000028(ribosomal small subunit assembly);GO:0003729(mRNA binding);GO:0003735(structural constituent of ribosome);GO:0006412(translation);GO:0019843(rRNA binding);GO:0022627(cytosolic small ribosomal subunit)	03010(Ribosome)	K02989	NA	PREDICTED: Capra hircus ribosomal protein S5 (RPS5), mRNA	661.941	559.842	590.462	393.055	555.906	552.241
MSTRG.14	chrNC_005044.2	12919	14227	-	ND6	MSTRG.14.1;MSTRG.14.2;1485867	NA	NA	NA	NA		689.43	346.2	430.597	480.991	791.411	547.726
MSTRG.6640	chrNC_030822.1	6307216	6321787	-	F2	MSTRG.6640.1;XM_018059136.1	GO:0001934(positive regulation of protein phosphorylation);GO:0004252(serine-type endopeptidase activity);GO:0005102(receptor binding);GO:0005509(calcium ion binding);GO:0005515(protein binding);GO:0005829(cytosol);GO:0006508(proteolysis);GO:0006953(acute-phase response);GO:0007166(cell surface receptor signaling pathway);GO:0008284(positive regulation of cell proliferation);GO:0008360(regulation…	04080(Neuroactive ligand-receptor interaction);04810(Regulation of actin cytoskeleton);04610(Complement and coagulation cascades)	K01313	EC:3.4.21.5	PREDICTED: Capra hircus coagulation factor II, thrombin (F2), mRNA	509.821	516.725	575.959	586.196	522.425	542.225
MSTRG.10304	chrNC_030830.1	15586635	15628578	-	ECI2	MSTRG.10304.1;XM_018039032.1;MSTRG.10304.2;MSTRG.10304.3;MSTRG.10304.4;MSTRG.10304.5;MSTRG.10304.6;XM_018039037.1;XM_018039038.1;XM_018039039.1;XM_018039034.1;XM_018039036.1;XM_018039040.1;XM_018039033.1;XM_018039035.1;MSTRG.10304.16;MSTRG.10304.17;MSTRG.10304.18;MSTRG.10304.19;MSTRG.10304.20;MSTRG.10304.21;MSTRG.10304.22;MSTRG.10304.23;MSTRG.10304.24;MSTRG.10304.25;MSTRG.10304.26;MSTRG.10304.27;…	GO:0000062(fatty-acyl-CoA binding);GO:0004165(dodecenoyl-CoA delta-isomerase activity);GO:0005102(receptor binding);GO:0005654(nucleoplasm);GO:0005739(mitochondrion);GO:0005782(peroxisomal matrix);GO:0009062(fatty acid catabolic process);GO:0016020(membrane);GO:0016020(membrane)	00071(Fatty acid degradation);04146(Peroxisome);04146(Peroxisome)	K13239	EC:5.3.3.8	PREDICTED: Capra hircus enoyl-CoA delta isomerase 2 (ECI2), transcript variant X1, mRNA;PREDICTED: Capra hircus enoyl-CoA delta isomerase 2 (ECI2), transcript variant X6, mRNA;PREDICTED: Capra hircus enoyl-CoA delta isomerase 2 (ECI2), transcript variant X7, mRNA;PREDICTED: Capra hircus enoyl-CoA delta isomerase 2 (ECI2), transcript variant X8, mRNA;PREDICTED: Capra hircus enoyl-CoA delta isomera…	364.203	550.319	417.42	982.931	390.926	541.16
MSTRG.13058	chrNW_017214815.1	13288	14292	-	LOC108635380	XR_001917792.1	NA	NA	NA	NA	PREDICTED: Capra hircus uncharacterized LOC108635380 (LOC108635380), ncRNA	759.501	297.177	499.085	916.612	229.214	540.318
MSTRG.12944	chrNW_017191855.1	187	1552	.		MSTRG.12944.1	NA	NA	NA	NA		556.818	392.739	380.361	617.274	682.205	525.879
MSTRG.11355	chrNC_030832.1	39658666	39662075	+	ACTB	MSTRG.11355.1;MSTRG.11355.2;XM_018039831.1;MSTRG.11355.4;MSTRG.11355.5;NM_001314342.1	GO:0005856(cytoskeleton);GO:0005886(plasma membrane);GO:0005925(focal adhesion);GO:0097433(dense body);GO:0097433(dense body)	04015(Rap1 signaling pathway);04390(Hippo signaling pathway);04145(Phagosome);04810(Regulation of actin cytoskeleton);04210(Apoptosis);04510(Focal adhesion);04520(Adherens junction);04530(Tight junction);04611(Platelet activation);04670(Leukocyte transendothelial migration);04921(Oxytocin signaling pathway);04919(Thyroid hormone signaling pathway);05205(Proteoglycans in cancer);05410(Hypertrophic…	K05692	NA	PREDICTED: Capra hircus actin beta (ACTB), transcript variant X1, mRNA;Capra hircus actin beta (ACTB), mRNA	561.365	442.639	497.667	529.42	592.751	524.768
MSTRG.13	chrNC_005044.2	11748	13568	+	ND5	1485866	NA	NA	NA	NA		773.32	392.291	270.196	517.458	645.141	519.681
MSTRG.3417	chrNC_030814.1	67064238	67066843	-	CFD	XM_018050499.1	GO:0004252(serine-type endopeptidase activity);GO:0005576(extracellular region);GO:0006508(proteolysis);GO:0006957(complement activation, alternative pathway)	04610(Complement and coagulation cascades);05150(Staphylococcus aureus infection)	K01334	EC:3.4.21.46	PREDICTED: Capra hircus complement factor D (CFD), mRNA	803.681	384.609	510.882	513.13	327.388	507.938
MSTRG.8292	chrNC_030825.1	56959355	56961974	+	RPS11	XM_005692721.3	GO:0003735(structural constituent of ribosome);GO:0006412(translation);GO:0019843(rRNA binding);GO:0022627(cytosolic small ribosomal subunit)	03010(Ribosome)	K02949	NA	PREDICTED: Capra hircus ribosomal protein S11 (RPS11), mRNA	549.871	525.27	548.138	366.821	532.144	504.449
MSTRG.6375	chrNC_030821.1	16048416	16051780	-	RPL30	XM_005689213.3	GO:0003723(RNA binding);GO:0003735(structural constituent of ribosome);GO:0006412(translation);GO:0022625(cytosolic large ribosomal subunit)	03010(Ribosome)	K02908	NA	PREDICTED: Capra hircus ribosomal protein L30 (RPL30), mRNA	528.66	553.044	566.385	386.604	479.88	502.914
MSTRG.7711	chrNC_030824.1	68020620	68028594	-	FGG	XM_005691155.3;XM_005691156.3;MSTRG.7711.1	GO:0005102(receptor binding);GO:0005198(structural molecule activity);GO:0005577(fibrinogen complex);GO:0005938(cell cortex);GO:0007160(cell-matrix adhesion);GO:0007165(signal transduction);GO:0009306(protein secretion);GO:0009897(external side of plasma membrane);GO:0030674(protein binding, bridging);GO:0031091(platelet alpha granule);GO:0031639(plasminogen activation);GO:0034116(positive regula…	04610(Complement and coagulation cascades);04611(Platelet activation);05150(Staphylococcus aureus infection);05150(Staphylococcus aureus infection)	K03905	NA	PREDICTED: Capra hircus fibrinogen gamma chain (FGG), transcript variant X1, mRNA;PREDICTED: Capra hircus fibrinogen gamma chain (FGG), transcript variant X2, mRNA	592.919	560.719	586.304	358.037	355.722	490.74
MSTRG.7508	chrNC_030824.1	9277356	9282421	-	RPL6	XM_005709406.3;XM_013970794.2	GO:0000027(ribosomal large subunit assembly);GO:0002181(cytoplasmic translation);GO:0003735(structural constituent of ribosome);GO:0022625(cytosolic large ribosomal subunit);GO:0022625(cytosolic large ribosomal subunit)	03010(Ribosome);03010(Ribosome)	K02934	NA	PREDICTED: Capra hircus ribosomal protein L6 (RPL6), transcript variant X1, mRNA;PREDICTED: Capra hircus ribosomal protein L6 (RPL6), transcript variant X2, mRNA	475.539	527.443	481.519	434.291	524.71	488.7
MSTRG.10891	chrNC_030832.1	1430148	1432481	-	RPS2	XM_018040703.1;MSTRG.10891.1	GO:0003729(mRNA binding);GO:0003735(structural constituent of ribosome);GO:0005654(nucleoplasm);GO:0005925(focal adhesion);GO:0006412(translation);GO:0016020(membrane);GO:0017134(fibroblast growth factor binding);GO:0019899(enzyme binding);GO:0022627(cytosolic small ribosomal subunit);GO:0051347(positive regulation of transferase activity);GO:0070062(extracellular exosome)	03010(Ribosome)	K02981	NA	PREDICTED: Capra hircus ribosomal protein S2 (RPS2), mRNA	639.366	433.42	474.439	409.428	467.518	484.834
MSTRG.3838	chrNC_030814.1	104140061	104145710	+	UBA52	XM_018051446.1;XM_005682102.2;MSTRG.3838.3	GO:0003735(structural constituent of ribosome);GO:0005634(nucleus);GO:0005840(ribosome);GO:0006412(translation);GO:0043209(myelin sheath);GO:0043209(myelin sheath)	03010(Ribosome);03010(Ribosome)	K02927	NA	PREDICTED: Capra hircus ubiquitin A-52 residue ribosomal protein fusion product 1 (UBA52), transcript variant X1, mRNA;PREDICTED: Capra hircus ubiquitin A-52 residue ribosomal protein fusion product 1 (UBA52), transcript variant X2, mRNA	508.355	475.594	515.445	374.982	502.812	475.438
MSTRG.6797	chrNC_030822.1	35728164	35737497	-	HPX	MSTRG.6797.1;MSTRG.6797.2;MSTRG.6797.3;MSTRG.6797.4;MSTRG.6797.5;XM_005689766.3	GO:0002639(positive regulation of immunoglobulin production);GO:0002925(positive regulation of humoral immune response mediated by circulating immunoglobulin);GO:0005623(cell);GO:0006879(cellular iron ion homeostasis);GO:0015232(heme transporter activity);GO:0015886(heme transport);GO:0020027(hemoglobin metabolic process);GO:0042168(heme metabolic process);GO:0042511(positive regulation of tyrosi…	NA	NA	NA	PREDICTED: Capra hircus hemopexin (HPX), mRNA	584.718	375.517	437.908	547.224	418.021	472.678
MSTRG.6854	chrNC_030822.1	46920211	46923018	-	RPS13	XM_018059608.1	GO:0003729(mRNA binding);GO:0003735(structural constituent of ribosome);GO:0005730(nucleolus);GO:0005925(focal adhesion);GO:0006412(translation);GO:0016020(membrane);GO:0022627(cytosolic small ribosomal subunit);GO:0033119(negative regulation of RNA splicing);GO:0070062(extracellular exosome);GO:0070181(small ribosomal subunit rRNA binding)	03010(Ribosome)	K02953	NA	PREDICTED: Capra hircus ribosomal protein S13 (RPS13), mRNA	441.106	489.265	456.47	420.463	531.03	467.667
MSTRG.1170	chrNC_030810.1	19528475	19531122	+	RPS8	XM_005678553.3;MSTRG.1170.2	GO:0000462(maturation of SSU-rRNA from tricistronic rRNA transcript (SSU-rRNA, 5.8S rRNA, LSU-rRNA));GO:0003735(structural constituent of ribosome);GO:0006412(translation);GO:0016020(membrane);GO:0022627(cytosolic small ribosomal subunit);GO:0030529(intracellular ribonucleoprotein complex)	03010(Ribosome)	K02995	NA	PREDICTED: Capra hircus ribosomal protein S8 (RPS8), mRNA	472.17	482.027	526.824	355.974	420.616	451.522
MSTRG.4750	chrNC_030817.1	57236826	57242810	-	PPIB	XM_005685667.3	GO:0000413(protein peptidyl-prolyl isomerization);GO:0003755(peptidyl-prolyl cis-trans isomerase activity);GO:0005634(nucleus);GO:0005788(endoplasmic reticulum lumen);GO:0005925(focal adhesion);GO:0016020(membrane);GO:0032403(protein complex binding);GO:0032991(macromolecular complex);GO:0034663(endoplasmic reticulum chaperone complex);GO:0040018(positive regulation of multicellular organism grow…	04020(Calcium signaling pathway);04022(cGMP - PKG signaling pathway);05012(Parkinson's disease);05016(Huntington's disease);05145(Toxoplasmosis)	K09565	EC:5.2.1.8	PREDICTED: Capra hircus peptidylprolyl isomerase B (PPIB), mRNA	457.749	439.47	442.761	385.701	505.785	446.293
MSTRG.4373	chrNC_030816.1	56815375	56830671	+	ARG1	XM_013966479.2;XM_018052863.1;MSTRG.4373.3;NM_001285705.1	GO:0000050(urea cycle);GO:0004053(arginase activity);GO:0005634(nucleus);GO:0005737(cytoplasm);GO:0006525(arginine metabolic process);GO:0046872(metal ion binding);GO:0070062(extracellular exosome);GO:0070062(extracellular exosome)	01230(Biosynthesis of amino acids);00220(Arginine biosynthesis);00330(Arginine and proline metabolism);05146(Amoebiasis);05146(Amoebiasis)	K01476	EC:3.5.3.1	PREDICTED: Capra hircus arginase 1 (ARG1), transcript variant X1, mRNA;PREDICTED: Capra hircus arginase 1 (ARG1), transcript variant X2, mRNA;Capra hircus arginase 1 (ARG1), mRNA	449.835	469.551	415.009	504.604	375.605	442.921
MSTRG.5282	chrNC_030818.1	47527375	47534568	+	FABP1	MSTRG.5282.1;NM_001287558.1;MSTRG.5282.2	GO:0002230(positive regulation of defense response to virus by host);GO:0003682(chromatin binding);GO:0005215(transporter activity);GO:0005654(nucleoplasm);GO:0005737(cytoplasm);GO:0006810(transport);GO:0008289(lipid binding);GO:0016209(antioxidant activity);GO:0043154(negative regulation of cysteine-type endopeptidase activity involved in apoptotic process);GO:0070062(extracellular exosome);GO:0…	03320(PPAR signaling pathway);04975(Fat digestion and absorption)	K08750	NA	Capra hircus fatty acid binding protein 1 (FABP1), mRNA	596.48	367.052	298.635	325.406	609.142	439.343
MSTRG.8195	chrNC_030825.1	53708654	53713960	+	APOC4;APOC2	XM_018062564.1;MSTRG.8195.1;MSTRG.8195.2;XM_018062565.1;XM_018062566.1;XM_005701774.3;XM_013977105.2	GO:0005319(lipid transporter activity);GO:0006869(lipid transport);GO:0010890(positive regulation of sequestering of triglyceride);GO:0034361(very-low-density lipoprotein particle);GO:0034364(high-density lipoprotein particle);GO:0070328(triglyceride homeostasis);GO:0010898(positive regulation of triglyceride catabolic process);GO:0016042(lipid catabolic process);GO:0034362(low-density lipoprotei…	NA	NA	NA	PREDICTED: Capra hircus apolipoprotein C4 (APOC4), mRNA;PREDICTED: Capra hircus apolipoprotein C2 (APOC2), transcript variant X2, mRNA;PREDICTED: Capra hircus apolipoprotein C2 (APOC2), transcript variant X4, mRNA;PREDICTED: Capra hircus apolipoprotein C2 (APOC2), transcript variant X3, mRNA;PREDICTED: Capra hircus apolipoprotein C2 (APOC2), transcript variant X1, mRNA	486.685	419.194	401.975	464.527	361.743	426.825
MSTRG.3214	chrNC_030814.1	28364885	28366736	+	RPS23	XM_018050054.1	GO:0003735(structural constituent of ribosome);GO:0005730(nucleolus);GO:0006412(translation);GO:0016020(membrane);GO:0022627(cytosolic small ribosomal subunit);GO:0044822(poly(A) RNA binding)	03010(Ribosome)	K02973	NA	PREDICTED: Capra hircus ribosomal protein S23 (RPS23), mRNA	443.708	463.618	456.174	310.468	433.4	421.474
MSTRG.8473	chrNC_030825.1	67059815	67064689	-	A1BG	XM_018063545.1;MSTRG.8473.1;MSTRG.8473.2	GO:0070062(extracellular exosome);GO:0072562(blood microparticle)	04380(Osteoclast differentiation)	K06512	NA	PREDICTED: Capra hircus alpha-1-B glycoprotein (A1BG), mRNA	527.053	458.228	500.828	294.06	319.786	419.991
MSTRG.6719	chrNC_030822.1	28417119	28421784	-	RPS3	XM_005689986.2	GO:0003684(damaged DNA binding);GO:0003729(mRNA binding);GO:0003735(structural constituent of ribosome);GO:0005634(nucleus);GO:0005730(nucleolus);GO:0005743(mitochondrial inner membrane);GO:0005759(mitochondrial matrix);GO:0005844(polysome);GO:0005925(focal adhesion);GO:0006281(DNA repair);GO:0006351(transcription, DNA-templated);GO:0006412(translation);GO:0007059(chromosome segregation);GO:00070…	03010(Ribosome)	K02985	NA	PREDICTED: Capra hircus ribosomal protein S3 (RPS3), mRNA	473.255	450.098	450.686	289.299	421.394	416.946
MSTRG.12170	chrNC_030836.1	43751628	43753327	-	FAU	XM_005699885.3	GO:0003735(structural constituent of ribosome);GO:0022627(cytosolic small ribosomal subunit)	03010(Ribosome)	K02983	NA	PREDICTED: Capra hircus FAU, ubiquitin like and ribosomal protein S30 fusion (FAU), mRNA	413.617	409.076	432.384	352.902	476.176	416.831
MSTRG.3631	chrNC_030814.1	93458752	93459904	-	RPS28	XM_005682426.3	GO:0003735(structural constituent of ribosome);GO:0006364(rRNA processing);GO:0006407(rRNA export from nucleus);GO:0006412(translation);GO:0022627(cytosolic small ribosomal subunit);GO:0042274(ribosomal small subunit biogenesis);GO:0044822(poly(A) RNA binding);GO:0070062(extracellular exosome)	03010(Ribosome)	K02979	NA	PREDICTED: Capra hircus ribosomal protein S28 (RPS28), mRNA	389.835	370.723	367.936	490.081	465.51	416.817
MSTRG.7181	chrNC_030823.1	45672307	45679278	+	RPL22	XM_005690753.3	GO:0003735(structural constituent of ribosome);GO:0005634(nucleus);GO:0005925(focal adhesion);GO:0006412(translation);GO:0008201(heparin binding);GO:0022625(cytosolic large ribosomal subunit);GO:0044822(poly(A) RNA binding);GO:0046632(alpha-beta T cell differentiation);GO:0070062(extracellular exosome)	03010(Ribosome)	K02891	NA	PREDICTED: Capra hircus ribosomal protein L22 (RPL22), mRNA	382.535	427.085	393.691	429.779	448.216	416.261
MSTRG.4060	chrNC_030815.1	62810521	62834529	+	ANP32B	XM_018052214.1;XM_018052212.1	GO:0001944(vasculature development);GO:0005730(nucleolus);GO:0005737(cytoplasm);GO:0006334(nucleosome assembly);GO:0006919(activation of cysteine-type endopeptidase activity involved in apoptotic process);GO:0021591(ventricular system development);GO:0042393(histone binding);GO:0045596(negative regulation of cell differentiation);GO:0046827(positive regulation of protein export from nucleus);GO:0…	03040(Spliceosome);03040(Spliceosome)	K11092	NA	PREDICTED: Capra hircus acidic nuclear phosphoprotein 32 family member B (ANP32B), transcript variant X2, mRNA;PREDICTED: Capra hircus acidic nuclear phosphoprotein 32 family member B (ANP32B), transcript variant X1, mRNA	352.747	462.327	488.991	323.866	441.187	413.824
MSTRG.12551	chrNW_017189517.1	24623505	24627009	+	RPL39	XM_005700291.3	GO:0003723(RNA binding);GO:0003735(structural constituent of ribosome);GO:0006412(translation);GO:0022625(cytosolic large ribosomal subunit)	03010(Ribosome)	K02924	NA	PREDICTED: Capra hircus ribosomal protein L39 (RPL39), mRNA	383.745	399.326	381.401	416.27	485.01	413.15
MSTRG.3957	chrNC_030815.1	24797188	24801738	+	RPS6	XM_005683632.3	GO:0003735(structural constituent of ribosome);GO:0005634(nucleus);GO:0006364(rRNA processing);GO:0006412(translation);GO:0022627(cytosolic small ribosomal subunit);GO:0042274(ribosomal small subunit biogenesis);GO:0042593(glucose homeostasis);GO:0048471(perinuclear region of cytoplasm)	03010(Ribosome);04066(HIF-1 signaling pathway);04151(PI3K-Akt signaling pathway);04150(mTOR signaling pathway);04910(Insulin signaling pathway);05205(Proteoglycans in cancer)	K02991	NA	PREDICTED: Capra hircus ribosomal protein S6 (RPS6), mRNA	459.223	425.888	388.831	355.855	428.794	411.718
MSTRG.1362	chrNC_030810.1	69932568	69940746	+	RPL5	XM_005678097.3;XM_018045768.1	GO:0000027(ribosomal large subunit assembly);GO:0003735(structural constituent of ribosome);GO:0005730(nucleolus);GO:0005737(cytoplasm);GO:0006412(translation);GO:0008097(5S rRNA binding);GO:0022625(cytosolic large ribosomal subunit);GO:0022625(cytosolic large ribosomal subunit)	03010(Ribosome);03010(Ribosome)	K02932	NA	PREDICTED: Capra hircus ribosomal protein L5 (RPL5), transcript variant X1, mRNA;PREDICTED: Capra hircus ribosomal protein L5 (RPL5), transcript variant X2, mRNA	431.972	492.352	437.236	277.371	410.39	409.864
MSTRG.6566	chrNC_030821.1	81613582	81616285	+	RPL8	MSTRG.6566.1;XM_013969042.2	GO:0002181(cytoplasmic translation);GO:0003735(structural constituent of ribosome);GO:0005730(nucleolus);GO:0005925(focal adhesion);GO:0016020(membrane);GO:0019843(rRNA binding);GO:0022625(cytosolic large ribosomal subunit);GO:0044822(poly(A) RNA binding)	03010(Ribosome)	K02938	NA	PREDICTED: Capra hircus ribosomal protein L8 (RPL8), mRNA	478.089	430.436	446.453	281.557	411.617	409.63
MSTRG.11729	chrNC_030834.1	29083969	29084927	+	LOC108634081	XM_018041857.1	GO:0003729(mRNA binding);GO:0003735(structural constituent of ribosome);GO:0005654(nucleoplasm);GO:0005925(focal adhesion);GO:0006412(translation);GO:0016020(membrane);GO:0017134(fibroblast growth factor binding);GO:0019899(enzyme binding);GO:0022627(cytosolic small ribosomal subunit);GO:0051347(positive regulation of transferase activity);GO:0070062(extracellular exosome)	03010(Ribosome)	K02981	NA	PREDICTED: Capra hircus 40S ribosomal protein S2 (LOC108634081), mRNA	316.259	463.19	508.006	213.317	536.31	407.416
MSTRG.90	chrNC_030808.1	45797446	45802706	-	RPL24	XM_005674869.3	GO:0000027(ribosomal large subunit assembly);GO:0003735(structural constituent of ribosome);GO:0006412(translation);GO:0016020(membrane);GO:0022625(cytosolic large ribosomal subunit);GO:0044822(poly(A) RNA binding);GO:0070062(extracellular exosome);GO:1902626(assembly of large subunit precursor of preribosome)	03010(Ribosome)	K02896	NA	PREDICTED: Capra hircus ribosomal protein L24 (RPL24), mRNA	421.947	378.2	355.758	363.717	496.561	403.237
MSTRG.2417	chrNC_030812.1	56655438	56657822	-	RPS26	XM_013963957.2	GO:0003735(structural constituent of ribosome);GO:0005840(ribosome);GO:0006412(translation)	03010(Ribosome)	K02976	NA	PREDICTED: Capra hircus ribosomal protein S26 (RPS26), mRNA	422.379	392.033	413.247	321.883	441.131	398.135
MSTRG.10606	chrNC_030830.1	39288184	39290771	-	RPL10A	XM_005696250.2	GO:0000470(maturation of LSU-rRNA);GO:0003723(RNA binding);GO:0003735(structural constituent of ribosome);GO:0005730(nucleolus);GO:0005925(focal adhesion);GO:0006412(translation);GO:0016020(membrane);GO:0022625(cytosolic large ribosomal subunit);GO:0044822(poly(A) RNA binding);GO:0070062(extracellular exosome)	03010(Ribosome)	K02865	NA	PREDICTED: Capra hircus ribosomal protein L10a (RPL10A), mRNA	412.789	435.015	408.476	306.92	410.124	394.665
MSTRG.2720	chrNC_030812.1	109670475	109676709	-	RPL3	XM_005681086.3	GO:0000027(ribosomal large subunit assembly);GO:0003735(structural constituent of ribosome);GO:0005730(nucleolus);GO:0006412(translation);GO:0022625(cytosolic large ribosomal subunit)	03010(Ribosome)	K02925	NA	PREDICTED: Capra hircus ribosomal protein L3 (RPL3), mRNA	446.759	416.487	426.138	308.882	372.857	394.225
MSTRG.12239	chrNC_030836.1	45706795	45709304	-	RPLP2	XM_018042708.1	GO:0003735(structural constituent of ribosome);GO:0005840(ribosome);GO:0006414(translational elongation)	03010(Ribosome)	K02943	NA	PREDICTED: Capra hircus ribosomal protein lateral stalk subunit P2 (RPLP2), mRNA	365.6	370.272	374.603	387.763	472.4	394.128
MSTRG.2487	chrNC_030812.1	70369856	70372947	+	LOC102190762	XM_005680591.2	GO:0005576(extracellular region);GO:0005581(collagen trimer)	04920(Adipocytokine signaling pathway);03320(PPAR signaling pathway)	K07296	NA	PREDICTED: Capra hircus protein HP-25 homolog 1 (LOC102190762), mRNA	446.584	440.85	485.232	328.934	257.653	391.851
MSTRG.7705	chrNC_030824.1	67973405	67981196	+	FGB	MSTRG.7705.1;MSTRG.7705.2;XM_005691158.2;MSTRG.7705.4	GO:0005102(receptor binding);GO:0005198(structural molecule activity);GO:0005577(fibrinogen complex);GO:0005938(cell cortex);GO:0007160(cell-matrix adhesion);GO:0007165(signal transduction);GO:0009897(external side of plasma membrane);GO:0030674(protein binding, bridging);GO:0031091(platelet alpha granule);GO:0031639(plasminogen activation);GO:0034116(positive regulation of heterotypic cell-cell …	04610(Complement and coagulation cascades);04611(Platelet activation)	K03904	NA	PREDICTED: Capra hircus fibrinogen beta chain (FGB), mRNA	471.897	460.815	433.465	275.309	314.395	391.176
MSTRG.8093	chrNC_030825.1	49999720	50002248	-	RPS16	XM_018062391.1	GO:0000462(maturation of SSU-rRNA from tricistronic rRNA transcript (SSU-rRNA, 5.8S rRNA, LSU-rRNA));GO:0003735(structural constituent of ribosome);GO:0006412(translation);GO:0022627(cytosolic small ribosomal subunit)	03010(Ribosome)	K02960	NA	PREDICTED: Capra hircus ribosomal protein S16 (RPS16), mRNA	433.227	390.588	377.587	349.6	398.375	389.875
MSTRG.780	chrNC_030809.1	31149536	31178739	-	IGFBP2	NM_001314299.1	GO:0005615(extracellular space);GO:0032868(response to insulin)	04115(p53 signaling pathway);05202(Transcriptional misregulation in cancers)	K10138	NA	Capra hircus insulin like growth factor binding protein 2 (IGFBP2), mRNA	571.555	453.544	427.622	288.802	199.648	388.234
MSTRG.12405	chrNW_017189516.1	23050419	23052807	-	HSD17B10	XM_005700869.3	GO:0003857(3-hydroxyacyl-CoA dehydrogenase activity);GO:0005739(mitochondrion);GO:0008033(tRNA processing);GO:0030283(testosterone dehydrogenase [NAD(P)] activity);GO:0044822(poly(A) RNA binding);GO:0047015(3-hydroxy-2-methylbutyryl-CoA dehydrogenase activity);GO:0055114(oxidation-reduction process)	00280(Valine, leucine and isoleucine degradation);05010(Alzheimer's disease)	K08683	EC:1.1.1.35;EC:1.1.1.178	PREDICTED: Capra hircus hydroxysteroid 17-beta dehydrogenase 10 (HSD17B10), mRNA	388.867	428.952	444.759	333.533	297.255	378.673
MSTRG.8969	chrNC_030826.1	40330536	40331703	-	IGFBP4	MSTRG.8969.1;MSTRG.8969.2	NA	NA	NA	NA		424.126	379.056	358.673	365.347	344.236	374.288
MSTRG.5596	chrNC_030818.1	103662472	103665820	+	RPL7A	MSTRG.5596.1;XM_018056140.1	GO:0000470(maturation of LSU-rRNA);GO:0003723(RNA binding);GO:0005730(nucleolus);GO:0005925(focal adhesion);GO:0006412(translation);GO:0016020(membrane);GO:0022625(cytosolic large ribosomal subunit);GO:0042788(polysomal ribosome);GO:0044822(poly(A) RNA binding);GO:0070062(extracellular exosome)	03010(Ribosome)	K02936	NA	PREDICTED: Capra hircus ribosomal protein L7a (RPL7A), mRNA	420.008	392.362	391.149	283.117	371.205	371.568
MSTRG.702	chrNC_030809.1	16306356	16311598	-	PTMA	XM_018058360.1;XM_018058366.1;MSTRG.702.1	NA	05169(Epstein-Barr virus infection);05169(Epstein-Barr virus infection)	K13784	NA	PREDICTED: Capra hircus prothymosin, alpha (PTMA), transcript variant X1, mRNA;PREDICTED: Capra hircus prothymosin, alpha (PTMA), transcript variant X2, mRNA	386.543	360.359	308.94	335.093	429.99	364.185
MSTRG.3272	chrNC_030814.1	48647020	48650971	+	RPS14	XM_005683172.3;XM_005683173.3	GO:0022627(cytosolic small ribosomal subunit);GO:0000028(ribosomal small subunit assembly);GO:0000462(maturation of SSU-rRNA from tricistronic rRNA transcript (SSU-rRNA, 5.8S rRNA, LSU-rRNA));GO:0003735(structural constituent of ribosome);GO:0006412(translation);GO:0048027(mRNA 5'-UTR binding);GO:0070181(small ribosomal subunit rRNA binding);GO:0070181(small ribosomal subunit rRNA binding)	03010(Ribosome);03010(Ribosome)	K02955	NA	PREDICTED: Capra hircus ribosomal protein S14 (RPS14), transcript variant X1, mRNA;PREDICTED: Capra hircus ribosomal protein S14 (RPS14), transcript variant X2, mRNA	393.791	408.251	393.627	238.364	377.223	362.251
MSTRG.12459	chrNW_017189516.1	50632954	50635027	-	TMSB4X	NM_001287029.1	GO:0003785(actin monomer binding);GO:0007015(actin filament organization)	04810(Regulation of actin cytoskeleton)	K05764	NA	Capra hircus thymosin beta 4, X-linked (TMSB4X), mRNA	681.689	307.569	287.32	232.029	275.754	356.872
MSTRG.3446	chrNC_030814.1	70210717	70215393	+	RACK1	MSTRG.3446.1;XM_018050555.1	GO:0001891(phagocytic cup);GO:0001934(positive regulation of protein phosphorylation);GO:0005080(protein kinase C binding);GO:0005634(nucleus);GO:0005737(cytoplasm);GO:0005739(mitochondrion);GO:0005829(cytosol);GO:0006919(activation of cysteine-type endopeptidase activity involved in apoptotic process);GO:0007165(signal transduction);GO:0008200(ion channel inhibitor activity);GO:0008656(cysteine-…	05162(Measles)	K14753	NA	PREDICTED: Capra hircus receptor for activated C kinase 1 (RACK1), mRNA	354.533	359.058	364.543	321.418	370.643	354.039
MSTRG.9919	chrNC_030829.1	12539746	12553014	+	RPSA	XM_013973310.2;NM_001285749.1	GO:0000028(ribosomal small subunit assembly);GO:0003735(structural constituent of ribosome);GO:0005055(laminin receptor activity);GO:0005634(nucleus);GO:0005886(plasma membrane);GO:0006412(translation);GO:0007155(cell adhesion);GO:0022627(cytosolic small ribosomal subunit);GO:0043236(laminin binding);GO:0043236(laminin binding)	03010(Ribosome);03010(Ribosome)	K02998	NA	PREDICTED: Capra hircus ribosomal protein SA (RPSA), transcript variant X1, mRNA;Capra hircus ribosomal protein SA (RPSA), mRNA	243.421	397.496	432.398	264.058	417.012	350.877
MSTRG.639	chrNC_030809.1	10824577	10826710	+	ATPIF1	XM_018056878.1	GO:0001937(negative regulation of endothelial cell proliferation);GO:0005515(protein binding);GO:0005516(calmodulin binding);GO:0005739(mitochondrion);GO:0006783(heme biosynthetic process);GO:0009396(folic acid-containing compound biosynthetic process);GO:0009986(cell surface);GO:0030218(erythrocyte differentiation);GO:0030272(5-formyltetrahydrofolate cyclo-ligase activity);GO:0032780(negative re…	00670(One carbon pool by folate)	K01934	EC:6.3.3.2	PREDICTED: Capra hircus ATPase inhibitory factor 1 (ATPIF1), mRNA	326.33	372.792	457.545	314.682	275.865	349.443
MSTRG.9269	chrNC_030826.1	56459954	56464188	-	RPL38	XM_018063886.1;XM_018063887.1;XM_018063885.1	GO:0001501(skeletal system development);GO:0001503(ossification);GO:0003723(RNA binding);GO:0003735(structural constituent of ribosome);GO:0005925(focal adhesion);GO:0006412(translation);GO:0006417(regulation of translation);GO:0007605(sensory perception of sound);GO:0022618(ribonucleoprotein complex assembly);GO:0022625(cytosolic large ribosomal subunit);GO:0033291(eukaryotic 80S initiation comp…	03010(Ribosome);03010(Ribosome)	K02923	NA	PREDICTED: Capra hircus ribosomal protein L38 (RPL38), transcript variant X2, mRNA;PREDICTED: Capra hircus ribosomal protein L38 (RPL38), transcript variant X3, mRNA;PREDICTED: Capra hircus ribosomal protein L38 (RPL38), transcript variant X1, mRNA	318.885	310.668	309.912	387.958	407.783	347.041
MSTRG.2858	chrNC_030813.1	16990783	16995481	-	LOC102186381	XM_005681324.3	GO:0003723(RNA binding);GO:0003735(structural constituent of ribosome);GO:0005730(nucleolus);GO:0005739(mitochondrion);GO:0006412(translation);GO:0022625(cytosolic large ribosomal subunit);GO:0042254(ribosome biogenesis);GO:0070062(extracellular exosome)	03010(Ribosome)	K02915	NA	PREDICTED: Capra hircus 60S ribosomal protein L34 (LOC102186381), mRNA	338.407	347.416	353.219	312.682	367.646	343.874
MSTRG.12863	chrNW_017189992.1	5282	9551	+	LOC108634769	MSTRG.12863.1	NA	NA	NA	NA		458.552	197.154	215.729	453.519	368.297	338.65
MSTRG.8163	chrNC_030825.1	52179968	52263069	-	RPS19	MSTRG.8163.1;XM_018062504.1;XM_005692574.3	GO:0000028(ribosomal small subunit assembly);GO:0003735(structural constituent of ribosome);GO:0022627(cytosolic small ribosomal subunit);GO:0006412(translation);GO:0006412(translation)	03010(Ribosome);03010(Ribosome)	K02966	NA	PREDICTED: Capra hircus ribosomal protein S19 (RPS19), transcript variant X2, mRNA;PREDICTED: Capra hircus ribosomal protein S19 (RPS19), transcript variant X1, mRNA	364.203	309.025	340.669	298.71	377.671	338.056
MSTRG.6785	chrNC_030822.1	34071717	34073359	-	LOC102175876	XM_005689815.3	GO:0005344(oxygen transporter activity);GO:0005506(iron ion binding);GO:0005833(hemoglobin complex);GO:0015671(oxygen transport);GO:0019825(oxygen binding);GO:0020037(heme binding)	05144(Malaria);05143(African trypanosomiasis)	K13823	NA	PREDICTED: Capra hircus hemoglobin subunit beta-A-like (LOC102175876), mRNA	373.808	311.581	461.843	424.434	105.169	335.367
MSTRG.7874	chrNC_030825.1	25412231	25413865	-	LOC102188072	XM_005691999.2;MSTRG.7874.1	GO:0005634(nucleus);GO:0005737(cytoplasm);GO:0008270(zinc ion binding);GO:0036018(cellular response to erythropoietin);GO:0045926(negative regulation of growth);GO:0048471(perinuclear region of cytoplasm);GO:0071276(cellular response to cadmium ion);GO:0071294(cellular response to zinc ion)	04978(Mineral absorption)	K14739	NA	PREDICTED: Capra hircus metallothionein-2 (LOC102188072), mRNA	473.329	285.774	409.919	307.056	198.383	334.892
MSTRG.7707	chrNC_030824.1	67999800	68008159	-	FGA	MSTRG.7707.4;MSTRG.7707.3;MSTRG.7707.1;MSTRG.7707.2;XM_005691157.3	GO:0005102(receptor binding);GO:0005198(structural molecule activity);GO:0005577(fibrinogen complex);GO:0005938(cell cortex);GO:0007160(cell-matrix adhesion);GO:0007165(signal transduction);GO:0009897(external side of plasma membrane);GO:0030674(protein binding, bridging);GO:0031091(platelet alpha granule);GO:0031639(plasminogen activation);GO:0034116(positive regulation of heterotypic cell-cell …	04610(Complement and coagulation cascades);04611(Platelet activation)	K03903	NA	PREDICTED: Capra hircus fibrinogen alpha chain (FGA), mRNA	378.826	343.855	355.702	279.283	288.275	329.188
MSTRG.4382	chrNC_030816.1	58088823	58092096	+	RPS12	XM_005684773.3;MSTRG.4382.2	GO:0003735(structural constituent of ribosome);GO:0006412(translation);GO:0016020(membrane);GO:0022627(cytosolic small ribosomal subunit);GO:0044822(poly(A) RNA binding)	03010(Ribosome)	K02951	NA	PREDICTED: Capra hircus ribosomal protein S12 (RPS12), mRNA	383.219	363.114	368.39	251.596	277.04	328.672
MSTRG.3055	chrNC_030813.1	89441904	89443040	+	LOC102181854	XM_013964718.2	GO:0008201(heparin binding);GO:0016525(negative regulation of angiogenesis);GO:0019221(cytokine-mediated signaling pathway);GO:0030168(platelet activation);GO:0030595(leukocyte chemotaxis);GO:0030816(positive regulation of cAMP metabolic process);GO:0042127(regulation of cell proliferation);GO:0043950(positive regulation of cAMP-mediated signaling);GO:0045653(negative regulation of megakaryocyte …	04060(Cytokine-cytokine receptor interaction);04062(Chemokine signaling pathway)	K05407	NA	PREDICTED: Capra hircus platelet factor 4 (LOC102181854), mRNA	401.924	251.346	445.214	177.262	347.176	324.584
MSTRG.8691	chrNC_030826.1	22644651	22656868	+	SERPINF1	XM_005693317.3	GO:0004867(serine-type endopeptidase inhibitor activity);GO:0005576(extracellular region);GO:0005615(extracellular space);GO:0010951(negative regulation of endopeptidase activity);GO:0016525(negative regulation of angiogenesis);GO:0031012(extracellular matrix);GO:0042470(melanosome);GO:0050769(positive regulation of neurogenesis);GO:0060770(negative regulation of epithelial cell proliferation inv…	04310(Wnt signaling pathway)	K19614	NA	PREDICTED: Capra hircus serpin family F member 1 (SERPINF1), mRNA	356.183	387.453	362.623	208.739	298.242	322.648
MSTRG.2083	chrNC_030811.1	88678380	88678846	+	LOC102173911	XR_001295574.2;MSTRG.2083.2	GO:0005784(Sec61 translocon complex);GO:0006613(cotranslational protein targeting to membrane);GO:0016021(integral component of membrane)	03010(Ribosome)	K02957	NA	PREDICTED: Capra hircus 40S ribosomal protein S15a pseudogene (LOC102173911), misc_RNA	279.599	324.783	295.602	322.034	385.063	321.416
MSTRG.3266	chrNC_030814.1	48112334	48120522	-	GPX3	MSTRG.3266.1;XM_005683183.3	GO:0004602(glutathione peroxidase activity);GO:0005615(extracellular space);GO:0006979(response to oxidative stress);GO:0008430(selenium binding);GO:0051289(protein homotetramerization);GO:0055114(oxidation-reduction process)	00590(Arachidonic acid metabolism);00480(Glutathione metabolism);04918(Thyroid hormone synthesis)	K00432	EC:1.11.1.9	PREDICTED: Capra hircus glutathione peroxidase 3 (GPX3), mRNA	531.166	416.279	331.458	173.048	150.45	320.48
MSTRG.12688	chrNW_017189598.1	21366	25680	-	LOC102186286	XM_005700603.3	GO:0004129(cytochrome-c oxidase activity);GO:0005746(mitochondrial respiratory chain);GO:1902600(hydrogen ion transmembrane transport)	00190(Oxidative phosphorylation);04260(Cardiac muscle contraction);05010(Alzheimer's disease);05012(Parkinson's disease);05016(Huntington's disease);04932(Non-alcoholic fatty liver disease (NAFLD))	K02271	NA	PREDICTED: Capra hircus cytochrome c oxidase subunit 7B, mitochondrial (LOC102186286), mRNA	281.148	321.613	308.164	368.146	321.184	320.051
MSTRG.12996	chrNW_017201244.1	80559	84103	-	RPL10	MSTRG.12996.1;XM_018045354.1;MSTRG.12996.3;MSTRG.12996.2	GO:0000027(ribosomal large subunit assembly);GO:0003735(structural constituent of ribosome);GO:0006412(translation);GO:0022625(cytosolic large ribosomal subunit)	03010(Ribosome)	K02866	NA	PREDICTED: Capra hircus ribosomal protein L10 (RPL10), mRNA	367.366	319.958	327.099	266.073	311.013	318.302
MSTRG.10696	chrNC_030831.1	22228784	22229338	+	LOC102176283	XR_001297223.2	GO:0000027(ribosomal large subunit assembly);GO:0000166(nucleotide binding);GO:0003735(structural constituent of ribosome);GO:0005730(nucleolus);GO:0006412(translation);GO:0008283(cell proliferation);GO:0022625(cytosolic large ribosomal subunit);GO:0044822(poly(A) RNA binding);GO:0070062(extracellular exosome)	03010(Ribosome)	K02893	NA	PREDICTED: Capra hircus 60S ribosomal protein L23a pseudogene (LOC102176283), misc_RNA	352.111	344.017	350.393	255.021	286.189	317.546
MSTRG.7496	chrNC_030824.1	8561764	8565824	+	RPLP0	XM_005709526.3;MSTRG.7496.2;NM_001314331.1	GO:0002181(cytoplasmic translation);GO:0003735(structural constituent of ribosome);GO:0005634(nucleus);GO:0005737(cytoplasm);GO:0022625(cytosolic large ribosomal subunit);GO:0030529(intracellular ribonucleoprotein complex);GO:0030687(preribosome, large subunit precursor);GO:0042254(ribosome biogenesis);GO:0070180(large ribosomal subunit rRNA binding);GO:0070180(large ribosomal subunit rRNA bindin…	03010(Ribosome);03010(Ribosome)	K02941	NA	PREDICTED: Capra hircus ribosomal protein lateral stalk subunit P0 (RPLP0), transcript variant X1, mRNA;Capra hircus ribosomal protein lateral stalk subunit P0 (RPLP0), mRNA	390.521	338.828	372.278	182.589	273.787	311.601
MSTRG.6878	chrNC_030822.1	52675083	52682400	-	HMBS	MSTRG.6878.2;MSTRG.6878.1;MSTRG.6878.3;XM_005689536.3	GO:0004418(hydroxymethylbilane synthase activity);GO:0006782(protoporphyrinogen IX biosynthetic process);GO:0018160(peptidyl-pyrromethane cofactor linkage)	00860(Porphyrin and chlorophyll metabolism)	K01749	EC:2.5.1.61	PREDICTED: Capra hircus hydroxymethylbilane synthase (HMBS), mRNA	247.929	293.901	334.103	370.961	306.197	310.618
MSTRG.7060	chrNC_030823.1	24331730	24332707	+	LOC102179869	XR_001296630.2	GO:0000027(ribosomal large subunit assembly);GO:0003735(structural constituent of ribosome);GO:0005730(nucleolus);GO:0005737(cytoplasm);GO:0006412(translation);GO:0008097(5S rRNA binding);GO:0022625(cytosolic large ribosomal subunit)	03010(Ribosome)	K02932	NA	PREDICTED: Capra hircus 60S ribosomal protein L5 pseudogene (LOC102179869), misc_RNA	305.193	358.726	309.952	238.137	340.089	310.419
MSTRG.2726	chrNC_030812.1	109871658	109874009	+	ATF4	MSTRG.2726.1;XM_018048794.1;MSTRG.2726.3	GO:0000977(RNA polymerase II regulatory region sequence-specific DNA binding);GO:0000978(RNA polymerase II core promoter proximal region sequence-specific DNA binding);GO:0000981(RNA polymerase II transcription factor activity, sequence-specific DNA binding);GO:0001046(core promoter sequence-specific DNA binding);GO:0001077(transcriptional activator activity, RNA polymerase II core promoter proxi…	04141(Protein processing in endoplasmic reticulum);04010(MAPK signaling pathway);04668(TNF signaling pathway);04022(cGMP - PKG signaling pathway);04151(PI3K-Akt signaling pathway);04210(Apoptosis);04911(Insulin secretion);04922(Glucagon signaling pathway);04912(GnRH signaling pathway);04915(Estrogen signaling pathway);04918(Thyroid hormone synthesis);04925(Aldosterone synthesis and secretion);042…	K04374	NA	PREDICTED: Capra hircus activating transcription factor 4 (ATF4), mRNA	274.34	275.797	258.541	377.243	333.276	303.839
MSTRG.5873	chrNC_030820.1	12137728	12171339	+	ITIH2	MSTRG.5873.1;MSTRG.5873.2;MSTRG.5873.3;MSTRG.5873.4;XM_005687846.3;MSTRG.5873.6;MSTRG.5873.7;MSTRG.5873.8	GO:0004867(serine-type endopeptidase inhibitor activity);GO:0010951(negative regulation of endopeptidase activity);GO:0030212(hyaluronan metabolic process);GO:0070062(extracellular exosome);GO:0072562(blood microparticle)	NA	NA	NA	PREDICTED: Capra hircus inter-alpha-trypsin inhibitor heavy chain 2 (ITIH2), mRNA	266.69	350.444	357.964	255.052	282.072	302.444
MSTRG.11769	chrNC_030835.1	84115	95813	-	AGT	MSTRG.11769.1;XM_005699373.3	GO:0001822(kidney development);GO:0003014(renal system process);GO:0003081(regulation of systemic arterial blood pressure by renin-angiotensin);GO:0004867(serine-type endopeptidase inhibitor activity);GO:0005615(extracellular space);GO:0007186(G-protein coupled receptor signaling pathway);GO:0010535(positive regulation of activation of JAK2 kinase activity);GO:0010595(positive regulation of endot…	04924(Renin secretion);04614(Renin-angiotensin system);04270(Vascular smooth muscle contraction);05410(Hypertrophic cardiomyopathy (HCM))	K09821	NA	PREDICTED: Capra hircus angiotensinogen (AGT), mRNA	320.37	276.901	311.946	314.703	262.171	297.218
MSTRG.8419	chrNC_030825.1	63863196	63866377	-	RPL28	MSTRG.8419.1;MSTRG.8419.2;XM_018063075.1;XM_018063074.1	GO:0003735(structural constituent of ribosome);GO:0006412(translation);GO:0016020(membrane);GO:0022625(cytosolic large ribosomal subunit);GO:0030425(dendrite);GO:0036464(cytoplasmic ribonucleoprotein granule);GO:0044297(cell body);GO:0044822(poly(A) RNA binding);GO:0070062(extracellular exosome);GO:1903146(regulation of mitophagy);GO:1903146(regulation of mitophagy)	03010(Ribosome);03010(Ribosome)	K02903	NA	PREDICTED: Capra hircus ribosomal protein L28 (RPL28), transcript variant X2, mRNA;PREDICTED: Capra hircus ribosomal protein L28 (RPL28), transcript variant X1, mRNA	306.167	266.399	297.05	279.367	331.943	296.185
MSTRG.3751	chrNC_030814.1	97992275	97996125	-	CALR	MSTRG.3751.2;MSTRG.3751.1;XM_005682299.3	GO:0000122(negative regulation of transcription from RNA polymerase II promoter);GO:0001948(glycoprotein binding);GO:0002502(peptide antigen assembly with MHC class I protein complex);GO:0003729(mRNA binding);GO:0005178(integrin binding);GO:0005509(calcium ion binding);GO:0005615(extracellular space);GO:0005634(nucleus);GO:0005788(endoplasmic reticulum lumen);GO:0005829(cytosol);GO:0005844(polyso…	04141(Protein processing in endoplasmic reticulum);04145(Phagosome);04612(Antigen processing and presentation);05166(HTLV-I infection);05142(Chagas disease (American trypanosomiasis))	K08057	NA	PREDICTED: Capra hircus calreticulin (CALR), mRNA	322.918	301.828	289.659	250.538	314.741	295.937
MSTRG.12263	chrNC_030836.1	46057925	46059007	-	LOC108634238	XM_018043445.1	GO:0009607(response to biotic stimulus);GO:0016021(integral component of membrane)	04662(B cell receptor signaling pathway)	K19831	NA	PREDICTED: Capra hircus interferon-induced transmembrane protein 3-like (LOC108634238), mRNA	343.743	252.779	219.514	336.178	282.642	286.971
MSTRG.3397	chrNC_030814.1	66636574	66638473	-	RPS15	MSTRG.3397.1;XM_018050438.1	GO:0000028(ribosomal small subunit assembly);GO:0003735(structural constituent of ribosome);GO:0022627(cytosolic small ribosomal subunit)	03010(Ribosome)	K02958	NA	PREDICTED: Capra hircus ribosomal protein S15 (RPS15), mRNA	300.805	271.513	277.129	252.165	326.395	285.601
MSTRG.8280	chrNC_030825.1	56548701	56558091	+	BAX;FTL	XM_013971446.2;XM_018062750.1;MSTRG.8280.3;XM_018062751.1;MSTRG.8280.5;XM_018062752.1	GO:0001541(ovarian follicle development);GO:0001764(neuron migration);GO:0001777(T cell homeostatic proliferation);GO:0001782(B cell homeostasis);GO:0001783(B cell apoptotic process);GO:0001822(kidney development);GO:0001836(release of cytochrome c from mitochondria);GO:0001844(protein insertion into mitochondrial membrane involved in apoptotic signaling pathway);GO:0001974(blood vessel remodelin…	04141(Protein processing in endoplasmic reticulum);04071(Sphingolipid signaling pathway);04210(Apoptosis);04215(Apoptosis - multiple species);04115(p53 signaling pathway);04722(Neurotrophin signaling pathway);04211(Longevity regulating pathway - mammal);05200(Pathways in cancer);05203(Viral carcinogenesis);05210(Colorectal cancer);05014(Amyotrophic lateral sclerosis (ALS));05016(Huntington's dise…	K02159;K13625	NA	PREDICTED: Capra hircus BCL2 associated X, apoptosis regulator (BAX), transcript variant X3, mRNA;PREDICTED: Capra hircus BCL2 associated X, apoptosis regulator (BAX), transcript variant X1, mRNA;PREDICTED: Capra hircus BCL2 associated X, apoptosis regulator (BAX), transcript variant X2, mRNA;PREDICTED: Capra hircus ferritin light chain (FTL), mRNA	256.853	315.522	310.159	290.575	246.93	284.008
MSTRG.36	chrNC_030808.1	2266644	2307035	-	SOD1	MSTRG.36.1;NM_001285550.1	GO:0004784(superoxide dismutase activity);GO:0072593(reactive oxygen species metabolic process)	04146(Peroxisome);04213(Longevity regulating pathway - multiple species);05014(Amyotrophic lateral sclerosis (ALS));05016(Huntington's disease);05020(Prion diseases)	K04565	EC:1.15.1.1	Capra hircus superoxide dismutase 1 (SOD1), mRNA	285.187	276.528	308.891	264.458	283.051	283.623
MSTRG.3430	chrNC_030814.1	67269856	67276813	-	BSG	MSTRG.3430.1;XM_018050513.1	GO:0002080(acrosomal membrane);GO:0005739(mitochondrion);GO:0005886(plasma membrane);GO:0005925(focal adhesion);GO:0016021(integral component of membrane);GO:0070062(extracellular exosome)	NA	NA	NA	PREDICTED: Capra hircus basigin (Ok blood group) (BSG), mRNA	293.079	325.576	316.402	205.702	265.337	281.219
MSTRG.9711	chrNC_030828.1	54921050	54924334	+	SERF2	NM_001286962.1;MSTRG.9711.1;XM_013973129.2;MSTRG.9711.3;MSTRG.9711.4	GO:0005515(protein binding);GO:0005515(protein binding)	NA	NA	NA	Capra hircus small EDRK-rich factor 2 (SERF2), mRNA;PREDICTED: Capra hircus small EDRK-rich factor 2 (SERF2), transcript variant X1, mRNA	266.734	252.766	257.809	333.022	294.235	280.913
MSTRG.6900	chrNC_030822.1	54349683	54350189	-	LOC108637681	XR_001919241.1	GO:0003735(structural constituent of ribosome);GO:0006412(translation);GO:0016020(membrane);GO:0022627(cytosolic small ribosomal subunit);GO:0044822(poly(A) RNA binding)	03010(Ribosome)	K02951	NA	PREDICTED: Capra hircus 40S ribosomal protein S12 pseudogene (LOC108637681), misc_RNA	349.402	328.826	344.556	162.057	213.089	279.586
MSTRG.6392	chrNC_030821.1	18566570	18584122	-	PABPC1	XM_018058312.1;XM_018058311.1;MSTRG.6392.3	GO:0000166(nucleotide binding);GO:0000184(nuclear-transcribed mRNA catabolic process, nonsense-mediated decay);GO:0003723(RNA binding);GO:0005515(protein binding);GO:0005681(spliceosomal complex);GO:0006397(mRNA processing);GO:0008380(RNA splicing);GO:0010494(cytoplasmic stress granule);GO:0030529(intracellular ribonucleoprotein complex);GO:0031047(gene silencing by RNA);GO:0060213(positive regul…	03013(RNA transport);03015(mRNA surveillance pathway);03018(RNA degradation);03018(RNA degradation)	K13126	NA	PREDICTED: Capra hircus poly(A) binding protein cytoplasmic 1 (PABPC1), transcript variant X2, mRNA;PREDICTED: Capra hircus poly(A) binding protein cytoplasmic 1 (PABPC1), transcript variant X1, mRNA	309.005	334.154	239.184	202.191	292.492	275.405
MSTRG.5759	chrNC_030819.1	54101221	54105450	+	RPL21	XM_005687554.3;NM_001285632.1	GO:0003735(structural constituent of ribosome);GO:0006412(translation);GO:0022625(cytosolic large ribosomal subunit);GO:0022625(cytosolic large ribosomal subunit)	03010(Ribosome);03010(Ribosome)	K02889	NA	PREDICTED: Capra hircus ribosomal protein L21 (RPL21), transcript variant X1, mRNA;Capra hircus ribosomal protein L21 (RPL21), mRNA	288.259	315.062	309.976	222.564	239.697	275.112
MSTRG.9709	chrNC_030828.1	54881395	54900908	+	PDIA3	NM_001285732.1	GO:0003756(protein disulfide isomerase activity);GO:0005634(nucleus);GO:0005783(endoplasmic reticulum);GO:0005925(focal adhesion);GO:0009986(cell surface);GO:0043209(myelin sheath);GO:0044822(poly(A) RNA binding);GO:0045454(cell redox homeostasis);GO:0070062(extracellular exosome);GO:2001238(positive regulation of extrinsic apoptotic signaling pathway)	04141(Protein processing in endoplasmic reticulum);04612(Antigen processing and presentation)	K08056	EC:5.3.4.1	Capra hircus protein disulfide isomerase family A member 3 (PDIA3), mRNA	322.654	292.492	295.459	203.436	251.668	273.142
MSTRG.10399	chrNC_030830.1	21688672	21693129	+	TUBB	XM_013973992.2	GO:0003924(GTPase activity);GO:0005200(structural constituent of cytoskeleton);GO:0005525(GTP binding);GO:0005737(cytoplasm);GO:0005874(microtubule);GO:0007017(microtubule-based process)	04145(Phagosome);04540(Gap junction);05130(Pathogenic Escherichia coli infection)	K07375	NA	PREDICTED: Capra hircus tubulin beta class I (TUBB), mRNA	306.28	292.499	341.194	143.54	258.215	268.346
MSTRG.5771	chrNC_030819.1	56376438	56383261	-	HMGB1	XM_018056616.1;XM_018056617.1	GO:0000400(four-way junction DNA binding);GO:0000405(bubble DNA binding);GO:0000790(nuclear chromatin);GO:0000793(condensed chromosome);GO:0001530(lipopolysaccharide binding);GO:0001654(eye development);GO:0001773(myeloid dendritic cell activation);GO:0001935(endothelial cell proliferation);GO:0002250(adaptive immune response);GO:0002270(plasmacytoid dendritic cell activation);GO:0002281(macropha…	03410(Base excision repair);03410(Base excision repair)	K10802	NA	PREDICTED: Capra hircus high mobility group box 1 (HMGB1), transcript variant X1, mRNA;PREDICTED: Capra hircus high mobility group box 1 (HMGB1), transcript variant X2, mRNA	265.075	309.297	302.918	196.169	246.428	263.977
MSTRG.8560	chrNC_030826.1	14032984	14047871	+	LOC102171053	XM_005701409.3	GO:0000165(MAPK cascade);GO:0001649(osteoblast differentiation);GO:0001775(cell activation);GO:0002548(monocyte chemotaxis);GO:0004672(protein kinase activity);GO:0004698(calcium-dependent protein kinase C activity);GO:0005615(extracellular space);GO:0005622(intracellular);GO:0005737(cytoplasm);GO:0005829(cytosol);GO:0006468(protein phosphorylation);GO:0006816(calcium ion transport);GO:0006874(ce…	04060(Cytokine-cytokine receptor interaction);04620(Toll-like receptor signaling pathway);04062(Chemokine signaling pathway);05323(Rheumatoid arthritis);05132(Salmonella infection);05142(Chagas disease (American trypanosomiasis))	K05408	NA	PREDICTED: Capra hircus C-C motif chemokine 18 (LOC102171053), mRNA	235.88	340.938	320.7	174.203	243.862	263.117
MSTRG.8023	chrNC_030825.1	46821827	46823366	+	HAMP	XM_013971234.2;MSTRG.8023.2	GO:0002092(positive regulation of receptor internalization);GO:0005179(hormone activity);GO:0005615(extracellular space);GO:0005623(cell);GO:0006879(cellular iron ion homeostasis);GO:0010039(response to iron ion);GO:0034760(negative regulation of iron ion transmembrane transport);GO:0042742(defense response to bacterium);GO:0060586(multicellular organismal iron ion homeostasis);GO:1902916(positiv…	NA	NA	NA	PREDICTED: Capra hircus hepcidin antimicrobial peptide (HAMP), mRNA	266.696	247.722	257.299	505.767	36.9808	262.893
MSTRG.12265	chrNC_030836.1	46079126	46080203	+	LOC102180655	XM_005700083.3	GO:0009607(response to biotic stimulus);GO:0016021(integral component of membrane)	04662(B cell receptor signaling pathway)	K19831	NA	PREDICTED: Capra hircus interferon-induced transmembrane protein 3 (LOC102180655), mRNA	243.717	244.08	242.375	213.371	367.501	262.209
MSTRG.10033	chrNC_030829.1	47987806	48001710	-	ITIH3	MSTRG.10033.4;MSTRG.10033.6;MSTRG.10033.8;MSTRG.10033.1;MSTRG.10033.10;MSTRG.10033.11;MSTRG.10033.12;MSTRG.10033.13;MSTRG.10033.14;MSTRG.10033.15;MSTRG.10033.2;MSTRG.10033.3;MSTRG.10033.5;MSTRG.10033.7;MSTRG.10033.9;XM_013973522.2;XM_005695858.3	GO:0004867(serine-type endopeptidase inhibitor activity);GO:0010951(negative regulation of endopeptidase activity);GO:0030212(hyaluronan metabolic process);GO:0070062(extracellular exosome);GO:0070062(extracellular exosome)	03410(Base excision repair);03410(Base excision repair)	K10798	EC:2.4.2.30	PREDICTED: Capra hircus inter-alpha-trypsin inhibitor heavy chain 3 (ITIH3), transcript variant X2, mRNA;PREDICTED: Capra hircus inter-alpha-trypsin inhibitor heavy chain 3 (ITIH3), transcript variant X1, mRNA	280.842	285.856	276.439	270.504	192.472	261.223
MSTRG.579	chrNC_030809.1	6723078	6756122	+	RPL11	MSTRG.579.1;XM_013974382.2;XM_005676864.3	GO:0000027(ribosomal large subunit assembly);GO:0003735(structural constituent of ribosome);GO:0005730(nucleolus);GO:0006364(rRNA processing);GO:0006412(translation);GO:0006605(protein targeting);GO:0016020(membrane);GO:0019843(rRNA binding);GO:0022625(cytosolic large ribosomal subunit);GO:0034504(protein localization to nucleus);GO:0044822(poly(A) RNA binding);GO:0070062(extracellular exosome);G…	03010(Ribosome);03010(Ribosome)	K02868	NA	PREDICTED: Capra hircus ribosomal protein L11 (RPL11), transcript variant X1, mRNA;PREDICTED: Capra hircus ribosomal protein L11 (RPL11), transcript variant X2, mRNA	269.955	274.994	253.391	236.45	260.526	259.063
MSTRG.11209	chrNC_030832.1	35264989	35266715	+	HSPB1	XM_018040903.1	GO:0005634(nucleus);GO:0005737(cytoplasm);GO:0005819(spindle)	04010(MAPK signaling pathway);04370(VEGF signaling pathway);05169(Epstein-Barr virus infection);05146(Amoebiasis)	K04455	NA	PREDICTED: Capra hircus heat shock protein family B (small) member 1 (HSPB1), mRNA	236.51	229.883	225.52	227.218	364.9	256.806
MSTRG.1294	chrNC_030810.1	43638066	43640533	-	DIRAS3	MSTRG.1294.1;XM_018045397.1	GO:0005525(GTP binding);GO:0005622(intracellular);GO:0007264(small GTPase mediated signal transduction);GO:0016020(membrane)	04010(MAPK signaling pathway);04510(Focal adhesion)	K07836	NA	PREDICTED: Capra hircus DIRAS family GTPase 3 (DIRAS3), mRNA	328.879	251.536	268.737	254.956	164.669	253.755
MSTRG.6786	chrNC_030822.1	34118282	34119849	-	HBBC	XM_005689813.2	GO:0005344(oxygen transporter activity);GO:0005506(iron ion binding);GO:0005833(hemoglobin complex);GO:0015671(oxygen transport);GO:0019825(oxygen binding);GO:0020037(heme binding)	05144(Malaria);05143(African trypanosomiasis)	K13823	NA	PREDICTED: Capra hircus hemoglobin subunit beta-C-like (HBBC), mRNA	260.417	280.805	362.17	202.636	116.765	244.559
MSTRG.562	chrNC_030809.1	5156111	5160482	+	LOC102189078	XR_001918811.1	GO:0003700(transcription factor activity, sequence-specific DNA binding);GO:0006355(regulation of transcription, DNA-templated)	04722(Neurotrophin signaling pathway)	K12458	NA	PREDICTED: Capra hircus uncharacterized LOC102189078 (LOC102189078), misc_RNA	267.455	275.251	307.298	173.224	197.949	244.236
MSTRG.166	chrNC_030808.1	69937555	69941610	-	RPL35A	XM_005675050.3;XM_018046013.1;XM_005675049.3	GO:0002181(cytoplasmic translation);GO:0003735(structural constituent of ribosome);GO:0022625(cytosolic large ribosomal subunit);GO:0042273(ribosomal large subunit biogenesis);GO:0042273(ribosomal large subunit biogenesis)	03010(Ribosome);03010(Ribosome)	K02917	NA	PREDICTED: Capra hircus ribosomal protein L35a (RPL35A), transcript variant X2, mRNA;PREDICTED: Capra hircus ribosomal protein L35a (RPL35A), transcript variant X3, mRNA;PREDICTED: Capra hircus ribosomal protein L35a (RPL35A), transcript variant X1, mRNA	229.555	250.916	241.133	236.67	257.17	243.089
MSTRG.743	chrNC_030809.1	28609593	28613385	+	LOC102177846	XM_018059034.1	GO:0003924(GTPase activity);GO:0005200(structural constituent of cytoskeleton);GO:0005515(protein binding);GO:0005525(GTP binding);GO:0005737(cytoplasm);GO:0005874(microtubule);GO:0007017(microtubule-based process);GO:0019899(enzyme binding);GO:0070062(extracellular exosome)	04145(Phagosome);04210(Apoptosis);04540(Gap junction);05130(Pathogenic Escherichia coli infection)	K07374	NA	PREDICTED: Capra hircus tubulin alpha-4A chain (LOC102177846), mRNA	276.878	223.101	305.113	155.103	245.39	241.117
MSTRG.11796	chrNC_030835.1	4137133	4139437	-	ADIRF	XM_005699317.3	GO:0005634(nucleus);GO:0005654(nucleoplasm);GO:0005737(cytoplasm);GO:0045600(positive regulation of fat cell differentiation);GO:0045944(positive regulation of transcription from RNA polymerase II promoter);GO:0070062(extracellular exosome);GO:0071478(cellular response to radiation);GO:0072719(cellular response to cisplatin);GO:2001023(regulation of response to drug)	NA	NA	NA	PREDICTED: Capra hircus adipogenesis regulatory factor (ADIRF), mRNA	139.116	295.941	290.748	235.611	236.778	239.639
MSTRG.12373	chrNW_017189516.1	19599942	19615317	+	RGN	XM_018043994.1;MSTRG.12373.2;XM_018043995.1;XM_018043996.1;MSTRG.12373.5;XM_005700816.3;MSTRG.12373.7;XM_005700817.3;MSTRG.12373.10;MSTRG.12373.9;MSTRG.12373.11;MSTRG.12373.12	GO:0004341(gluconolactonase activity);GO:0005509(calcium ion binding);GO:0005634(nucleus);GO:0005654(nucleoplasm);GO:0005737(cytoplasm);GO:0006874(cellular calcium ion homeostasis);GO:0008270(zinc ion binding);GO:0019853(L-ascorbic acid biosynthetic process);GO:0030234(enzyme regulator activity);GO:0032781(positive regulation of ATPase activity);GO:0050848(regulation of calcium-mediated signaling…	01200(Carbon metabolism);00030(Pentose phosphate pathway);00053(Ascorbate and aldarate metabolism);00053(Ascorbate and aldarate metabolism)	K01053	EC:3.1.1.17	PREDICTED: Capra hircus regucalcin (RGN), transcript variant X3, mRNA;PREDICTED: Capra hircus regucalcin (RGN), transcript variant X4, mRNA;PREDICTED: Capra hircus regucalcin (RGN), transcript variant X5, mRNA;PREDICTED: Capra hircus regucalcin (RGN), transcript variant X1, mRNA;PREDICTED: Capra hircus regucalcin (RGN), transcript variant X2, mRNA	197.677	248.074	239.868	248.259	261.877	239.151
MSTRG.12935	chrNW_017190382.1	124	3454	-	LOC108634845	XM_018045203.1;MSTRG.12935.2	GO:0003674(molecular_function);GO:0005739(mitochondrion);GO:0043457(regulation of cellular respiration)	04611(Platelet activation);04974(Protein digestion and absorption);04933(AGE-RAGE signaling pathway in diabetic complications);05146(Amoebiasis)	K19720	NA	PREDICTED: Capra hircus basic proline-rich protein-like (LOC108634845), partial mRNA	248.154	138.564	141.722	247.705	417.838	238.797
MSTRG.6105	chrNC_030820.1	56781629	56848201	-	LOC102188874;LOC108633189	MSTRG.6105.1;XM_018057611.1;XM_018057612.1;XM_018057613.1;XM_018057614.1;XM_018057617.1;XM_018057616.1;MSTRG.6105.11;MSTRG.6105.10;MSTRG.6105.8;MSTRG.6105.9;XM_013968728.2;XM_018057618.1	GO:0003924(GTPase activity);GO:0004871(signal transducer activity);GO:0005525(GTP binding);GO:0007186(G-protein coupled receptor signaling pathway);GO:0031683(G-protein beta/gamma-subunit complex binding);GO:0005159(insulin-like growth factor receptor binding);GO:0005886(plasma membrane);GO:0007191(adenylate cyclase-activating dopamine receptor signaling pathway);GO:0007606(sensory perception of …	04015(Rap1 signaling pathway);04020(Calcium signaling pathway);04072(Phospholipase D signaling pathway);04024(cAMP signaling pathway);04540(Gap junction);04611(Platelet activation);04911(Insulin secretion);04922(Glucagon signaling pathway);04923(Regulation of lipolysis in adipocyte);04912(GnRH signaling pathway);04913(Ovarian Steroidogenesis);04915(Estrogen signaling pathway);04921(Oxytocin signa…	K04632	NA	PREDICTED: Capra hircus guanine nucleotide-binding protein G(s) subunit alpha isoforms short (LOC102188874), transcript variant X1, mRNA;PREDICTED: Capra hircus guanine nucleotide-binding protein G(s) subunit alpha isoforms short (LOC102188874), transcript variant X2, mRNA;PREDICTED: Capra hircus guanine nucleotide-binding protein G(s) subunit alpha isoforms short (LOC102188874), transcript varia…	205.646	248.868	223.34	259.097	245.123	236.415
MSTRG.12130	chrNC_030836.1	42693933	42695876	+	LOC102188021	XM_018043314.1	GO:0004129(cytochrome-c oxidase activity);GO:0005739(mitochondrion);GO:0016021(integral component of membrane);GO:1902600(hydrogen ion transmembrane transport)	00190(Oxidative phosphorylation);04260(Cardiac muscle contraction);05010(Alzheimer's disease);05012(Parkinson's disease);05016(Huntington's disease);04932(Non-alcoholic fatty liver disease (NAFLD))	K02273	NA	PREDICTED: Capra hircus cytochrome c oxidase subunit 8A, mitochondrial (LOC102188021), mRNA	260.626	240.413	267.096	207.219	205.833	236.237
MSTRG.10101	chrNC_030829.1	50585422	50590395	+	MST1	XM_018066659.1;MSTRG.10101.2;MSTRG.10101.3;MSTRG.10101.4;MSTRG.10101.5;MSTRG.10101.6;XM_018066658.1;MSTRG.10101.8	GO:0004252(serine-type endopeptidase activity);GO:0005773(vacuole);GO:0006508(proteolysis);GO:0007283(spermatogenesis);GO:0007566(embryo implantation);GO:0010628(positive regulation of gene expression);GO:0010758(regulation of macrophage chemotaxis);GO:0030317(sperm motility);GO:0033601(positive regulation of mammary gland epithelial cell proliferation);GO:0046425(regulation of JAK-STAT cascade);…	04060(Cytokine-cytokine receptor interaction);04510(Focal adhesion);04510(Focal adhesion)	K05460	NA	PREDICTED: Capra hircus macrophage stimulating 1 (MST1), transcript variant X2, mRNA;PREDICTED: Capra hircus macrophage stimulating 1 (MST1), transcript variant X1, mRNA	212.567	192.851	216.729	313.926	237.619	234.738
MSTRG.11318	chrNC_030832.1	37837862	37842935	+	ATP5J2	XM_005697871.3	GO:0005634(nucleus);GO:0005753(mitochondrial proton-transporting ATP synthase complex);GO:0006754(ATP biosynthetic process);GO:0015992(proton transport);GO:0016021(integral component of membrane);GO:0016887(ATPase activity);GO:0045263(proton-transporting ATP synthase complex, coupling factor F(o));GO:0070062(extracellular exosome)	00190(Oxidative phosphorylation)	K02130	NA	PREDICTED: Capra hircus ATP synthase, H+ transporting, mitochondrial Fo complex subunit F2 (ATP5J2), mRNA	187.191	209.569	222.377	257.169	291.445	233.55
MSTRG.3391	chrNC_030814.1	66497627	66500597	+	LOC102168533	XM_005682919.3	GO:0005743(mitochondrial inner membrane);GO:0008121(ubiquinol-cytochrome-c reductase activity);GO:0009055(electron carrier activity);GO:0016021(integral component of membrane);GO:0055114(oxidation-reduction process);GO:0070469(respiratory chain);GO:1902600(hydrogen ion transmembrane transport)	00190(Oxidative phosphorylation);04260(Cardiac muscle contraction);05010(Alzheimer's disease);05012(Parkinson's disease);05016(Huntington's disease);04932(Non-alcoholic fatty liver disease (NAFLD))	K00420	NA	PREDICTED: Capra hircus cytochrome b-c1 complex subunit 10 (LOC102168533), mRNA	221.267	198.038	211.338	291.097	240.013	232.351
MSTRG.3495	chrNC_030814.1	82415864	82416739	-	LOC102175205	XM_018050696.1	GO:0000470(maturation of LSU-rRNA);GO:0003723(RNA binding);GO:0005730(nucleolus);GO:0005925(focal adhesion);GO:0006412(translation);GO:0016020(membrane);GO:0022625(cytosolic large ribosomal subunit);GO:0042788(polysomal ribosome);GO:0044822(poly(A) RNA binding);GO:0070062(extracellular exosome)	03010(Ribosome)	K02936	NA	PREDICTED: Capra hircus 60S ribosomal protein L7a (LOC102175205), mRNA	274.209	255.127	258.457	144.225	214.894	229.382
MSTRG.7606	chrNC_030824.1	20309934	20313298	-	UBC	MSTRG.7606.1;XM_005691342.3;MSTRG.7606.3	GO:0005634(nucleus);GO:0005737(cytoplasm)	03320(PPAR signaling pathway)	K08770	NA	PREDICTED: Capra hircus ubiquitin C (UBC), mRNA	266.844	273.422	115.209	276.397	212.443	228.863
MSTRG.7439	chrNC_030824.1	3110152	3110809	+	LOC102183898	XR_001296727.2	GO:0003735(structural constituent of ribosome);GO:0006412(translation);GO:0015934(large ribosomal subunit)	03010(Ribosome)	K02880	NA	PREDICTED: Capra hircus 60S ribosomal protein L17 pseudogene (LOC102183898), misc_RNA	214.926	229.375	213.584	242.099	242.075	228.412
MSTRG.2104	chrNC_030811.1	106593643	106617350	+	SHFM1	XM_005678951.3	GO:0000502(proteasome complex);GO:0000724(double-strand break repair via homologous recombination);GO:0005634(nucleus);GO:0006406(mRNA export from nucleus);GO:0006508(proteolysis);GO:0008541(proteasome regulatory particle, lid subcomplex);GO:0043248(proteasome assembly)	03050(Proteasome);03440(Homologous recombination);05169(Epstein-Barr virus infection)	K10881	NA	PREDICTED: Capra hircus split hand/foot malformation (ectrodactyly) type 1 (SHFM1), mRNA	206.204	214.668	219.087	242.585	256.691	227.847
MSTRG.12347	chrNW_017189516.1	9710947	9715286	+	RPS4X	XM_005700650.3	GO:0003735(structural constituent of ribosome);GO:0006412(translation);GO:0019843(rRNA binding);GO:0022627(cytosolic small ribosomal subunit)	03010(Ribosome)	K02987	NA	PREDICTED: Capra hircus ribosomal protein S4, X-linked (RPS4X), mRNA	264.623	275.171	276.529	125.284	195.548	227.431
MSTRG.5578	chrNC_030818.1	102921461	102940501	-	UBAC1	XM_018056078.1;XM_018056077.1	GO:0005794(Golgi apparatus);GO:0005886(plasma membrane);GO:0070062(extracellular exosome);GO:0070062(extracellular exosome)	NA	NA	NA	PREDICTED: Capra hircus UBA domain containing 1 (UBAC1), transcript variant X2, mRNA;PREDICTED: Capra hircus UBA domain containing 1 (UBAC1), transcript variant X1, mRNA	218.509	242.379	264.359	167.285	243.278	227.162
MSTRG.12508	chrNW_017189517.1	11176219	11602965	+	GPC3	MSTRG.12508.1;MSTRG.12508.2;MSTRG.12508.3;MSTRG.12508.4;MSTRG.12508.5;MSTRG.12508.6;MSTRG.12508.7;MSTRG.12508.8;MSTRG.12508.9;XM_018044068.1	GO:0001658(branching involved in ureteric bud morphogenesis);GO:0005578(proteinaceous extracellular matrix);GO:0005764(lysosome);GO:0009948(anterior/posterior axis specification);GO:0010171(body morphogenesis);GO:0010466(negative regulation of peptidase activity);GO:0030282(bone mineralization);GO:0030316(osteoclast differentiation);GO:0030324(lung development);GO:0030513(positive regulation of B…	05205(Proteoglycans in cancer)	K08109	NA	PREDICTED: Capra hircus glypican 3 (GPC3), partial mRNA	246.984	264.63	298.394	139.013	184.903	226.785
MSTRG.9159	chrNC_030826.1	50629570	50632457	+	ACTG1	XM_018063603.1;MSTRG.9159.2	GO:0005856(cytoskeleton);GO:0005886(plasma membrane);GO:0005925(focal adhesion);GO:0097433(dense body)	04145(Phagosome);04810(Regulation of actin cytoskeleton);04510(Focal adhesion);04520(Adherens junction);04530(Tight junction);05132(Salmonella infection)	K05692	NA	PREDICTED: Capra hircus actin gamma 1 (ACTG1), mRNA	241.156	218.26	238.877	214.45	220.554	226.659
MSTRG.12630	chrNW_017189530.1	506352	513046	+	SERPIND1	MSTRG.12630.1;XM_018044381.1;XM_018044382.1	GO:0004867(serine-type endopeptidase inhibitor activity);GO:0005615(extracellular space);GO:0010951(negative regulation of endopeptidase activity);GO:0070062(extracellular exosome);GO:0070062(extracellular exosome)	04610(Complement and coagulation cascades);04610(Complement and coagulation cascades)	K03912	NA	PREDICTED: Capra hircus serpin family D member 1 (SERPIND1), transcript variant X1, mRNA;PREDICTED: Capra hircus serpin family D member 1 (SERPIND1), transcript variant X2, mRNA	225.707	239.992	252.065	214.743	199.07	226.315
MSTRG.9043	chrNC_030826.1	43701234	43718594	-	SLC4A1	MSTRG.9043.1;XM_018065222.1;MSTRG.9043.3;XM_018065223.1	GO:0005452(inorganic anion exchanger activity);GO:0005887(integral component of plasma membrane);GO:0008509(anion transmembrane transporter activity);GO:0015106(bicarbonate transmembrane transporter activity);GO:0015108(chloride transmembrane transporter activity);GO:0015301(anion:anion antiporter activity);GO:0015701(bicarbonate transport);GO:0016323(basolateral plasma membrane);GO:0030506(ankyr…	04966(Collecting duct acid secretion);04966(Collecting duct acid secretion)	K06573	NA	PREDICTED: Capra hircus solute carrier family 4 member 1 (Diego blood group) (SLC4A1), transcript variant X1, mRNA;PREDICTED: Capra hircus solute carrier family 4 member 1 (Diego blood group) (SLC4A1), transcript variant X2, mRNA	164.64	209.091	249.871	222.208	274.609	224.084
MSTRG.6379	chrNC_030821.1	16096003	16104730	-	RIDA	NM_001285713.1	GO:0004519(endonuclease activity);GO:0005739(mitochondrion);GO:0044822(poly(A) RNA binding);GO:0070062(extracellular exosome);GO:0090305(nucleic acid phosphodiester bond hydrolysis)	NA	NA	NA	Capra hircus reactive intermediate imine deaminase A homolog (RIDA), mRNA	197.249	213.615	201.509	262.391	232.703	221.494
MSTRG.3352	chrNC_030814.1	61282640	61283479	+		MSTRG.3352.1	NA	NA	NA	NA		125.85	181.732	155.312	282.314	358.985	220.839
MSTRG.857	chrNC_030809.1	64935652	64940898	-	DBI	XM_005676252.3	GO:0005794(Golgi apparatus);GO:0006810(transport);GO:0008289(lipid binding);GO:0036042(long-chain fatty acyl-CoA binding);GO:0036151(phosphatidylcholine acyl-chain remodeling);GO:0046983(protein dimerization activity);GO:0070062(extracellular exosome);GO:0097038(perinuclear endoplasmic reticulum)	03320(PPAR signaling pathway)	K08762	NA	PREDICTED: Capra hircus diazepam binding inhibitor, acyl-CoA binding protein (DBI), mRNA	200.107	223.047	195.729	246.713	235.211	220.162
MSTRG.7573	chrNC_030824.1	17758092	17770002	-	HPD	MSTRG.7573.1;MSTRG.7573.2;XM_005691406.3	GO:0003868(4-hydroxyphenylpyruvate dioxygenase activity);GO:0006559(L-phenylalanine catabolic process);GO:0006572(tyrosine catabolic process);GO:0046872(metal ion binding);GO:0055114(oxidation-reduction process)	00350(Tyrosine metabolism);00360(Phenylalanine metabolism);00130(Ubiquinone and other terpenoid-quinone biosynthesis)	K00457	EC:1.13.11.27	PREDICTED: Capra hircus 4-hydroxyphenylpyruvate dioxygenase (HPD), mRNA	236.5	227.782	239.319	205.167	181.949	218.143
MSTRG.5554	chrNC_030818.1	100242196	100293546	+	ASS1	XM_018055982.1	GO:0000050(urea cycle);GO:0000052(citrulline metabolic process);GO:0000053(argininosuccinate metabolic process);GO:0004055(argininosuccinate synthase activity);GO:0005524(ATP binding);GO:0005737(cytoplasm);GO:0006526(arginine biosynthetic process);GO:0006531(aspartate metabolic process);GO:0016597(amino acid binding);GO:0042802(identical protein binding);GO:0044822(poly(A) RNA binding);GO:0045429…	01230(Biosynthesis of amino acids);00250(Alanine, aspartate and glutamate metabolism);00220(Arginine biosynthesis)	K01940	EC:6.3.4.5	PREDICTED: Capra hircus argininosuccinate synthase 1 (ASS1), mRNA	259.556	213.243	256.286	168.409	191.561	217.811
MSTRG.3616	chrNC_030814.1	92699553	92735804	-	C3	MSTRG.3616.2;MSTRG.3616.3;MSTRG.3616.1;XM_018050944.1	GO:0001934(positive regulation of protein phosphorylation);GO:0004866(endopeptidase inhibitor activity);GO:0005615(extracellular space);GO:0006631(fatty acid metabolic process);GO:0006954(inflammatory response);GO:0006957(complement activation, alternative pathway);GO:0006958(complement activation, classical pathway);GO:0010828(positive regulation of glucose transport);GO:0010866(regulation of tr…	04145(Phagosome);04610(Complement and coagulation cascades);05203(Viral carcinogenesis);05322(Systemic lupus erythematosus);05133(Pertussis);05134(Legionellosis);05150(Staphylococcus aureus infection);05152(Tuberculosis);05168(Herpes simplex infection);05140(Leishmaniasis);05142(Chagas disease (American trypanosomiasis))	K03990	NA	PREDICTED: Capra hircus complement C3 (C3), mRNA	324.686	239.787	216.629	174.173	127.694	216.593
MSTRG.2778	chrNC_030812.1	112906645	112919429	+	TSPO	XM_018048872.1;XM_018048874.1;MSTRG.2778.3;XM_018048873.1	GO:0006869(lipid transport);GO:0016021(integral component of membrane);GO:0031966(mitochondrial membrane);GO:0031966(mitochondrial membrane)	04080(Neuroactive ligand-receptor interaction);05166(HTLV-I infection);05166(HTLV-I infection)	K05770	NA	PREDICTED: Capra hircus translocator protein (TSPO), transcript variant X1, mRNA;PREDICTED: Capra hircus translocator protein (TSPO), transcript variant X3, mRNA;PREDICTED: Capra hircus translocator protein (TSPO), transcript variant X2, mRNA	242.147	221.696	245.174	183.131	190.657	216.561
MSTRG.13070	chrNW_017215225.1	848	8644	-	LOC102184409	XM_018045558.1	GO:0004801(sedoheptulose-7-phosphate:D-glyceraldehyde-3-phosphate glyceronetransferase activity);GO:0005634(nucleus);GO:0005737(cytoplasm);GO:0005975(carbohydrate metabolic process);GO:0006098(pentose-phosphate shunt);GO:0070062(extracellular exosome)	01200(Carbon metabolism);01230(Biosynthesis of amino acids);00030(Pentose phosphate pathway)	K00616	EC:2.2.1.2	PREDICTED: Capra hircus transaldolase (LOC102184409), mRNA	230.546	200.348	221.086	221.317	203.3	215.319
MSTRG.2387	chrNC_030812.1	56095591	56107187	+	NACA	XM_005680328.3;XM_005680329.3;XM_013963935.1	GO:0003231(cardiac ventricle development);GO:0003677(DNA binding);GO:0003713(transcription coactivator activity);GO:0005515(protein binding);GO:0005634(nucleus);GO:0005737(cytoplasm);GO:0005854(nascent polypeptide-associated complex);GO:0006351(transcription, DNA-templated);GO:0006412(translation);GO:0010664(negative regulation of striated muscle cell apoptotic process);GO:0015031(protein transpo…	NA	NA	NA	PREDICTED: Capra hircus nascent polypeptide-associated complex alpha subunit (NACA), transcript variant X1, mRNA;PREDICTED: Capra hircus nascent polypeptide-associated complex alpha subunit (NACA), transcript variant X2, mRNA;PREDICTED: Capra hircus nascent polypeptide-associated complex alpha subunit (NACA), transcript variant X3, mRNA	218.57	228.593	222.765	191.366	208.825	214.024
MSTRG.3759	chrNC_030814.1	98100026	98105258	+	PRDX2	MSTRG.3759.1;MSTRG.3759.2;MSTRG.3759.3;MSTRG.3759.4;MSTRG.3759.5;XM_018051260.1;XM_018051261.1	GO:0005737(cytoplasm);GO:0008379(thioredoxin peroxidase activity);GO:0019430(removal of superoxide radicals);GO:0042981(regulation of apoptotic process);GO:0055114(oxidation-reduction process);GO:0070062(extracellular exosome);GO:0070062(extracellular exosome)	04146(Peroxisome);04146(Peroxisome)	K13279	EC:1.11.1.15	PREDICTED: Capra hircus peroxiredoxin 2 (PRDX2), transcript variant X1, mRNA;PREDICTED: Capra hircus peroxiredoxin 2 (PRDX2), transcript variant X2, mRNA	216.354	219.87	255.281	176.158	201.226	213.778
MSTRG.3357	chrNC_030814.1	63124731	63133432	+	LECT2	MSTRG.3357.1;XM_005682961.3	GO:0005576(extracellular region);GO:0006935(chemotaxis);GO:0042802(identical protein binding)	NA	NA	NA	PREDICTED: Capra hircus leukocyte cell derived chemotaxin 2 (LECT2), mRNA	216.882	240.834	240.181	205.516	165.037	213.69
MSTRG.7802	chrNC_030825.1	13164697	13171690	+	LOC102188434	XM_018061817.1	GO:0004129(cytochrome-c oxidase activity);GO:0005634(nucleus);GO:0005751(mitochondrial respiratory chain complex IV);GO:0006123(mitochondrial electron transport, cytochrome c to oxygen);GO:0016021(integral component of membrane);GO:0045277(respiratory chain complex IV);GO:0070062(extracellular exosome);GO:1902600(hydrogen ion transmembrane transport)	00190(Oxidative phosphorylation);04260(Cardiac muscle contraction);05010(Alzheimer's disease);05012(Parkinson's disease);05016(Huntington's disease);04932(Non-alcoholic fatty liver disease (NAFLD))	K02263	NA	PREDICTED: Capra hircus cytochrome c oxidase subunit 4 isoform 1, mitochondrial (LOC102188434), mRNA	226.401	217.212	229.507	180.724	208.925	212.554
MSTRG.899	chrNC_030809.1	95197087	95197973	-	LOC102174439	XR_001919577.1	GO:0005506(iron ion binding);GO:0006826(iron ion transport);GO:0006879(cellular iron ion homeostasis);GO:0008043(intracellular ferritin complex);GO:0008199(ferric iron binding)	04978(Mineral absorption)	K13625	NA	PREDICTED: Capra hircus ferritin light chain pseudogene (LOC102174439), misc_RNA	194.801	239.407	238.306	207.754	182.011	212.456
MSTRG.7892	chrNC_030825.1	27219290	27219735	+	LOC102172558	XM_018062056.1	GO:0003735(structural constituent of ribosome);GO:0005840(ribosome);GO:0006412(translation);GO:0022627(cytosolic small ribosomal subunit)	03010(Ribosome)	K02975	NA	PREDICTED: Capra hircus 40S ribosomal protein S25 (LOC102172558), mRNA	203.652	223.099	196.68	204.673	228.669	211.355
MSTRG.4261	chrNC_030816.1	179927	186462	-	EEF1A1	MSTRG.4261.1;XM_005684428.3;MSTRG.4261.3	GO:0000049(tRNA binding);GO:0003746(translation elongation factor activity);GO:0003924(GTPase activity);GO:0005515(protein binding);GO:0005525(GTP binding);GO:0005615(extracellular space);GO:0005622(intracellular);GO:0005634(nucleus);GO:0005730(nucleolus);GO:0005737(cytoplasm);GO:0005829(cytosol);GO:0006414(translational elongation);GO:0019901(protein kinase binding);GO:0030864(cortical actin cyt…	03013(RNA transport);05134(Legionellosis)	K03231	NA	PREDICTED: Capra hircus eukaryotic translation elongation factor 1 alpha 1 (EEF1A1), mRNA	273.721	242.904	245.026	117.024	176.902	211.116
MSTRG.8762	chrNC_030826.1	26765220	26767280	-	GABARAP	XM_005693485.3	GO:0000045(autophagosome assembly);GO:0000421(autophagosome membrane);GO:0000422(mitophagy);GO:0005829(cytosol);GO:0006995(cellular response to nitrogen starvation)	04068(FoxO signaling pathway);04140(Regulation of autophagy);04727(GABAergic synapse)	K08341	NA	PREDICTED: Capra hircus GABA type A receptor-associated protein (GABARAP), mRNA	223.204	212.306	216.783	171.039	210.458	206.758
MSTRG.6883	chrNC_030822.1	52758094	52760176	+	RPS25	MSTRG.6883.1;MSTRG.6883.2;XM_018059695.1	GO:0003735(structural constituent of ribosome);GO:0005840(ribosome);GO:0006412(translation);GO:0022627(cytosolic small ribosomal subunit)	03010(Ribosome)	K02975	NA	PREDICTED: Capra hircus ribosomal protein S25 (RPS25), mRNA	200.788	214.719	194.259	194.631	218.774	204.634
MSTRG.12936	chrNW_017190382.1	5042	14327	-	LOC108634846	XM_018045204.1	GO:0006355(regulation of transcription, DNA-templated);GO:0016021(integral component of membrane)	NA	NA	NA	PREDICTED: Capra hircus collagen alpha-1(I) chain-like (LOC108634846), mRNA	228.803	131.131	140.572	276.726	244.08	204.262
MSTRG.11819	chrNC_030835.1	11927125	11932483	-	RPS24	XM_005699248.3;XM_005699249.3;XM_005699251.3;XR_311186.3;MSTRG.11819.6;MSTRG.11819.7;MSTRG.11819.5;XM_005699250.3;XM_005699253.3	GO:0000166(nucleotide binding);GO:0000462(maturation of SSU-rRNA from tricistronic rRNA transcript (SSU-rRNA, 5.8S rRNA, LSU-rRNA));GO:0003735(structural constituent of ribosome);GO:0006412(translation);GO:0022627(cytosolic small ribosomal subunit);GO:0005840(ribosome);GO:0005840(ribosome)	03010(Ribosome);03010(Ribosome)	K02974	NA	PREDICTED: Capra hircus ribosomal protein S24 (RPS24), transcript variant X3, mRNA;PREDICTED: Capra hircus ribosomal protein S24 (RPS24), transcript variant X2, mRNA;PREDICTED: Capra hircus ribosomal protein S24 (RPS24), transcript variant X5, mRNA;PREDICTED: Capra hircus ribosomal protein S24 (RPS24), transcript variant X1, misc_RNA;PREDICTED: Capra hircus ribosomal protein S24 (RPS24), transcri…	177.22	203.61	196.489	191.811	249.954	203.817
MSTRG.12205	chrNC_030836.1	44502326	44504279	+	BANF1	XM_018043269.1;XM_005699911.3	GO:0003677(DNA binding);GO:0005654(nucleoplasm);GO:0005694(chromosome);GO:0005737(cytoplasm);GO:0015074(DNA integration);GO:0070062(extracellular exosome);GO:0070062(extracellular exosome)	NA	NA	NA	PREDICTED: Capra hircus barrier to autointegration factor 1 (BANF1), transcript variant X1, mRNA;PREDICTED: Capra hircus barrier to autointegration factor 1 (BANF1), transcript variant X2, mRNA	188.753	210.205	211.299	178.478	217.974	201.342
MSTRG.5641	chrNC_030818.1	106016620	106019084	-	TUBB4B	MSTRG.5641.1;XM_018056236.1	GO:0003924(GTPase activity);GO:0005200(structural constituent of cytoskeleton);GO:0005525(GTP binding);GO:0005737(cytoplasm);GO:0005874(microtubule);GO:0007017(microtubule-based process)	04145(Phagosome);04540(Gap junction);05130(Pathogenic Escherichia coli infection)	K07375	NA	PREDICTED: Capra hircus tubulin beta 4B class IVb (TUBB4B), mRNA	183.689	217.313	260.539	157.893	183.683	200.623
MSTRG.5867	chrNC_030820.1	7220378	7221010	-	LOC102186409	XM_005687825.3	GO:0003735(structural constituent of ribosome);GO:0006412(translation);GO:0015934(large ribosomal subunit)	03010(Ribosome)	K02880	NA	PREDICTED: Capra hircus 60S ribosomal protein L17 (LOC102186409), mRNA	253.442	197.281	184.394	159.388	191.105	197.122
MSTRG.6087	chrNC_030820.1	54184039	54185373	-	RPS21	XM_005688286.3	GO:0000447(endonucleolytic cleavage in ITS1 to separate SSU-rRNA from 5.8S rRNA and LSU-rRNA from tricistronic rRNA transcript (SSU-rRNA, 5.8S rRNA, LSU-rRNA));GO:0000461(endonucleolytic cleavage to generate mature 3'-end of SSU-rRNA from (SSU-rRNA, 5.8S rRNA, LSU-rRNA));GO:0003735(structural constituent of ribosome);GO:0022627(cytosolic small ribosomal subunit)	03010(Ribosome)	K02971	NA	PREDICTED: Capra hircus ribosomal protein S21 (RPS21), mRNA	190.706	164.367	173.265	233.325	223.377	197.008
MSTRG.6262	chrNC_030820.1	73767510	73772633	+	LOC102177641	XM_005688601.3	GO:0004867(serine-type endopeptidase inhibitor activity);GO:0010951(negative regulation of endopeptidase activity)	04610(Complement and coagulation cascades)	K03909	NA	PREDICTED: Capra hircus spleen trypsin inhibitor I (LOC102177641), mRNA	260.118	150.228	267.305	118.566	188.462	196.936
MSTRG.7697	chrNC_030824.1	64136546	64156761	+	RPS3A	XM_005691176.3;MSTRG.7697.1;MSTRG.7697.3	GO:0003735(structural constituent of ribosome);GO:0005730(nucleolus);GO:0005829(cytosol);GO:0005925(focal adhesion);GO:0006412(translation);GO:0022627(cytosolic small ribosomal subunit);GO:0030154(cell differentiation);GO:0030529(intracellular ribonucleoprotein complex);GO:0043066(negative regulation of apoptotic process);GO:0044822(poly(A) RNA binding);GO:0070062(extracellular exosome)	03010(Ribosome)	K02984	NA	PREDICTED: Capra hircus ribosomal protein S3A (RPS3A), mRNA	203.962	210.039	217.001	149.542	191.996	194.508
MSTRG.8773	chrNC_030826.1	26825394	26830560	+	EIF5A	MSTRG.8773.1;XM_018064569.1;MSTRG.8773.3;XM_018064570.1	GO:0003746(translation elongation factor activity);GO:0005643(nuclear pore);GO:0005789(endoplasmic reticulum membrane);GO:0006452(translational frameshifting);GO:0015031(protein transport);GO:0043022(ribosome binding);GO:0043065(positive regulation of apoptotic process);GO:0045901(positive regulation of translational elongation);GO:0045905(positive regulation of translational termination);GO:0051…	04120(Ubiquitin mediated proteolysis);04120(Ubiquitin mediated proteolysis)	K10447	NA	PREDICTED: Capra hircus eukaryotic translation initiation factor 5A (EIF5A), transcript variant X1, mRNA;PREDICTED: Capra hircus eukaryotic translation initiation factor 5A (EIF5A), transcript variant X2, mRNA	210.329	202.711	210.767	124.529	218.671	193.401
MSTRG.629	chrNC_030809.1	10302852	10306587	-	IFI6	XM_018056828.1;XM_018056827.1	GO:0001836(release of cytochrome c from mitochondria);GO:0005739(mitochondrion);GO:0043154(negative regulation of cysteine-type endopeptidase activity involved in apoptotic process);GO:0051902(negative regulation of mitochondrial depolarization);GO:2001240(negative regulation of extrinsic apoptotic signaling pathway in absence of ligand);GO:2001240(negative regulation of extrinsic apoptotic signa…	NA	NA	NA	PREDICTED: Capra hircus interferon alpha inducible protein 6 (IFI6), transcript variant X2, mRNA;PREDICTED: Capra hircus interferon alpha inducible protein 6 (IFI6), transcript variant X1, mRNA	357.48	136.27	133.62	270.862	61.7002	191.986
MSTRG.4785	chrNC_030817.1	60376270	60377558	+	RPL36AL	XM_005685626.2	GO:0003735(structural constituent of ribosome);GO:0005840(ribosome);GO:0006412(translation)	03010(Ribosome)	K02929	NA	PREDICTED: Capra hircus ribosomal protein L36a like (RPL36AL), mRNA	185.611	153.049	167.995	218.884	218.443	188.796
MSTRG.3717	chrNC_030814.1	96625946	96654146	-	TECR	XM_018051173.1;MSTRG.3717.3;MSTRG.3717.4;MSTRG.3717.2	GO:0005515(protein binding);GO:0005634(nucleus);GO:0005783(endoplasmic reticulum);GO:0005789(endoplasmic reticulum membrane);GO:0017099(very-long-chain-acyl-CoA dehydrogenase activity);GO:0030176(integral component of endoplasmic reticulum membrane);GO:0030497(fatty acid elongation);GO:0035338(long-chain fatty-acyl-CoA biosynthetic process);GO:0042761(very long-chain fatty acid biosynthetic proce…	01212(Fatty acid metabolism);00062(Fatty acid elongation);01040(Biosynthesis of unsaturated fatty acids)	K10258	EC:1.3.1.93	PREDICTED: Capra hircus trans-2,3-enoyl-CoA reductase (TECR), mRNA	171.345	159.303	181.605	208.558	217.448	187.652
MSTRG.12321	chrNC_030836.1	50549544	50556029	-	MRPL23	XM_018043526.1	GO:0000166(nucleotide binding);GO:0003723(RNA binding);GO:0003735(structural constituent of ribosome);GO:0005762(mitochondrial large ribosomal subunit);GO:0032543(mitochondrial translation)	03010(Ribosome)	K02892	NA	PREDICTED: Capra hircus mitochondrial ribosomal protein L23 (MRPL23), mRNA	194.943	166.966	183.772	201.392	188.084	187.031
MSTRG.11420	chrNC_030833.1	8676350	8677062	-	LOC102181054	XM_018041699.1	GO:0002181(cytoplasmic translation);GO:0003723(RNA binding);GO:0003735(structural constituent of ribosome);GO:0019843(rRNA binding);GO:0022625(cytosolic large ribosomal subunit)	03010(Ribosome)	K02940	NA	PREDICTED: Capra hircus 60S ribosomal protein L9 (LOC102181054), mRNA	167.368	269.409	258.049	90.027	148.79	186.729
MSTRG.4371	chrNC_030816.1	56622906	56623285	+	LOC108636730	XM_018053222.1	GO:0003735(structural constituent of ribosome);GO:0005634(nucleus);GO:0005925(focal adhesion);GO:0006412(translation);GO:0022625(cytosolic large ribosomal subunit);GO:0044822(poly(A) RNA binding);GO:0046872(metal ion binding);GO:0070062(extracellular exosome)	03010(Ribosome)	K02921	NA	PREDICTED: Capra hircus putative 60S ribosomal protein L37a (LOC108636730), mRNA	174.823	216.513	171.279	149.603	221.128	186.669
MSTRG.7872	chrNC_030825.1	25398869	25403156	-	LOC108637967	MSTRG.7872.1;XM_018062006.1;MSTRG.7872.4;MSTRG.7872.3	NA	NA	NA	NA	PREDICTED: Capra hircus metallothionein-1B (LOC108637967), mRNA	406.25	87.7521	214.701	166.318	47.4281	184.49
MSTRG.12316	chrNC_030836.1	50219448	50237824	-	CD81	MSTRG.12316.1;NM_001285676.1	GO:0005887(integral component of plasma membrane);GO:0007166(cell surface receptor signaling pathway);GO:0016020(membrane);GO:0031623(receptor internalization);GO:0071404(cellular response to low-density lipoprotein particle stimulus)	04662(B cell receptor signaling pathway);05160(Hepatitis C);05144(Malaria)	K06508	NA	Capra hircus CD81 molecule (CD81), mRNA	186.881	179.691	182.785	174.975	189.336	182.734
MSTRG.8035	chrNC_030825.1	47221135	47230386	+	LOC102179036	XM_005692298.3	GO:0004129(cytochrome-c oxidase activity);GO:0005739(mitochondrion);GO:0005743(mitochondrial inner membrane);GO:0005758(mitochondrial intermembrane space);GO:0045277(respiratory chain complex IV);GO:1902600(hydrogen ion transmembrane transport)	00190(Oxidative phosphorylation);04260(Cardiac muscle contraction);05010(Alzheimer's disease);05012(Parkinson's disease);05016(Huntington's disease);04932(Non-alcoholic fatty liver disease (NAFLD))	K02267	NA	PREDICTED: Capra hircus cytochrome c oxidase subunit 6B1 (LOC102179036), mRNA	180.067	182.626	172.835	170.992	194.472	180.198
MSTRG.9022	chrNC_030826.1	42698083	42702235	+	RPL27	MSTRG.9022.1;XM_005693883.3;XM_005693884.3;XM_018065160.1;XM_005693885.3;MSTRG.9022.5	GO:0003735(structural constituent of ribosome);GO:0022625(cytosolic large ribosomal subunit);GO:0022625(cytosolic large ribosomal subunit)	03010(Ribosome);03010(Ribosome)	K02901	NA	PREDICTED: Capra hircus ribosomal protein L27 (RPL27), transcript variant X1, mRNA;PREDICTED: Capra hircus ribosomal protein L27 (RPL27), transcript variant X2, mRNA;PREDICTED: Capra hircus ribosomal protein L27 (RPL27), transcript variant X4, mRNA;PREDICTED: Capra hircus ribosomal protein L27 (RPL27), transcript variant X3, mRNA	201.59	175.46	176.273	155.028	191.76	180.022
MSTRG.2405	chrNC_030812.1	56536624	56539821	-	MYL6	XM_005680364.3;XM_005680365.2;XM_005680366.2	GO:0005509(calcium ion binding);GO:0005829(cytosol);GO:0005903(brush border);GO:0008307(structural constituent of muscle);GO:0016020(membrane);GO:0016461(unconventional myosin complex);GO:0030898(actin-dependent ATPase activity);GO:0070062(extracellular exosome);GO:0003774(motor activity);GO:0006936(muscle contraction);GO:0007519(skeletal muscle tissue development);GO:0016459(myosin complex);GO:0…	04921(Oxytocin signaling pathway);04270(Vascular smooth muscle contraction);04270(Vascular smooth muscle contraction)	K12751	NA	PREDICTED: Capra hircus myosin light chain 6 (MYL6), transcript variant X1, mRNA;PREDICTED: Capra hircus myosin light chain 6 (MYL6), transcript variant X3, mRNA;PREDICTED: Capra hircus myosin light chain 6 (MYL6), transcript variant X2, mRNA	219.281	196.022	206.885	118.673	155.087	179.19
MSTRG.11917	chrNC_030835.1	37309848	37310409	-	LOC102169255	XR_001297388.2	GO:0000166(nucleotide binding);GO:0000462(maturation of SSU-rRNA from tricistronic rRNA transcript (SSU-rRNA, 5.8S rRNA, LSU-rRNA));GO:0003735(structural constituent of ribosome);GO:0006412(translation);GO:0022627(cytosolic small ribosomal subunit)	03010(Ribosome)	K02974	NA	PREDICTED: Capra hircus 40S ribosomal protein S24 pseudogene (LOC102169255), misc_RNA	144.091	186.836	174.057	160.681	228.716	178.876
MSTRG.5975	chrNC_030820.1	41538070	41542025	-	LOC102184534	XM_013968612.2	GO:0004869(cysteine-type endopeptidase inhibitor activity);GO:0005576(extracellular region);GO:0010951(negative regulation of endopeptidase activity)	04970(Salivary secretion)	K13899	NA	PREDICTED: Capra hircus cystatin-C (LOC102184534), mRNA	318.481	148.904	160.563	114.984	147.28	178.042
MSTRG.6068	chrNC_030820.1	53459839	53461498	-	PPDPF	MSTRG.6068.1;XM_018057534.1	GO:0001708(cell fate specification);GO:0031017(exocrine pancreas development)	NA	NA	NA	PREDICTED: Capra hircus pancreatic progenitor cell differentiation and proliferation factor (PPDPF), mRNA	173.254	182.312	182.922	156.927	188.66	176.815
MSTRG.4232	chrNC_030815.1	103251960	103265627	+	AGP	MSTRG.4232.1;MSTRG.4232.2;NM_001285630.1	GO:0002682(regulation of immune system process);GO:0005615(extracellular space);GO:0006810(transport);GO:0006953(acute-phase response)	NA	NA	NA	Capra hircus alpha 1 acid glycoprotein (AGP), mRNA	47.412	61.6669	32.7474	16.2553	716.323	174.881
MSTRG.4164	chrNC_030815.1	84259735	84271047	-	NINJ1	MSTRG.4164.1;XM_018052500.1	GO:0001954(positive regulation of cell-matrix adhesion);GO:0007155(cell adhesion);GO:0016021(integral component of membrane);GO:0042246(tissue regeneration);GO:1990384(hyaloid vascular plexus regression)	NA	NA	NA	PREDICTED: Capra hircus ninjurin 1 (NINJ1), mRNA	184.85	189.119	183.093	139.302	174.648	174.202
MSTRG.2563	chrNC_030812.1	92093670	92115554	-	MGST1	XM_018048426.1;XM_018048425.1;MSTRG.2563.3	GO:0004364(glutathione transferase activity);GO:0004602(glutathione peroxidase activity);GO:0005743(mitochondrial inner membrane);GO:0006749(glutathione metabolic process);GO:0016021(integral component of membrane);GO:0055114(oxidation-reduction process);GO:0071449(cellular response to lipid hydroperoxide);GO:0071449(cellular response to lipid hydroperoxide)	00480(Glutathione metabolism);00980(Metabolism of xenobiotics by cytochrome P450);00982(Drug metabolism - cytochrome P450);05204(Chemical carcinogenesis);05204(Chemical carcinogenesis)	K00799	EC:2.5.1.18	PREDICTED: Capra hircus microsomal glutathione S-transferase 1 (MGST1), transcript variant X2, mRNA;PREDICTED: Capra hircus microsomal glutathione S-transferase 1 (MGST1), transcript variant X1, mRNA	153.471	175.656	170.878	210.202	153.62	172.765
MSTRG.12415	chrNW_017189516.1	25494562	25521601	+	ALAS2	XM_005701303.3;XM_005701302.2;MSTRG.12415.1;MSTRG.12415.4;MSTRG.12415.5;MSTRG.12415.6;MSTRG.12415.7;MSTRG.12415.8	GO:0001666(response to hypoxia);GO:0003870(5-aminolevulinate synthase activity);GO:0005743(mitochondrial inner membrane);GO:0005759(mitochondrial matrix);GO:0006782(protoporphyrinogen IX biosynthetic process);GO:0006879(cellular iron ion homeostasis);GO:0030170(pyridoxal phosphate binding);GO:0030218(erythrocyte differentiation);GO:0042541(hemoglobin biosynthetic process);GO:0042541(hemoglobin bi…	00260(Glycine, serine and threonine metabolism);00860(Porphyrin and chlorophyll metabolism);00860(Porphyrin and chlorophyll metabolism)	K00643	EC:2.3.1.37	PREDICTED: Capra hircus 5'-aminolevulinate synthase 2 (ALAS2), transcript variant X2, mRNA;PREDICTED: Capra hircus 5'-aminolevulinate synthase 2 (ALAS2), transcript variant X1, mRNA	170.101	189.492	236.006	112.527	154.98	172.621
MSTRG.10747	chrNC_030831.1	37779684	37789428	+	LOC102174891	XM_005697075.3;XM_005697074.3	GO:0001725(stress fiber);GO:0005509(calcium ion binding);GO:0016460(myosin II complex);GO:0030018(Z disc);GO:0032036(myosin heavy chain binding);GO:0070527(platelet aggregation);GO:0070527(platelet aggregation)	04810(Regulation of actin cytoskeleton);04510(Focal adhesion);04530(Tight junction);04611(Platelet activation);04670(Leukocyte transendothelial migration);04670(Leukocyte transendothelial migration)	K12757	NA	PREDICTED: Capra hircus myosin regulatory light polypeptide 9 (LOC102174891), transcript variant X1, mRNA;PREDICTED: Capra hircus myosin regulatory light polypeptide 9 (LOC102174891), transcript variant X2, mRNA	174.303	181.322	181.547	139.632	184.468	172.254
MSTRG.12697	chrNW_017189614.1	35339	40278	-	LOC102178813	XM_018044555.1	GO:0003735(structural constituent of ribosome);GO:0005215(transporter activity);GO:0005634(nucleus);GO:0005743(mitochondrial inner membrane);GO:0006412(translation);GO:0006915(apoptotic process);GO:0016021(integral component of membrane);GO:0055085(transmembrane transport)	04020(Calcium signaling pathway);04022(cGMP - PKG signaling pathway);05012(Parkinson's disease);05016(Huntington's disease);05166(HTLV-I infection)	K05863	NA	PREDICTED: Capra hircus ADP/ATP translocase 3 (LOC102178813), mRNA	227.463	186.242	195.772	100.899	141.734	170.422
MSTRG.51	chrNC_030808.1	23867189	23868605	.		MSTRG.51.1	NA	NA	NA	NA		10.0036	121.885	133.693	286.749	299.507	170.368
MSTRG.11858	chrNC_030835.1	18558841	18563796	+	PCBD1	MSTRG.11858.1;XM_018042610.1	GO:0003713(transcription coactivator activity);GO:0004505(phenylalanine 4-monooxygenase activity);GO:0005515(protein binding);GO:0005654(nucleoplasm);GO:0005737(cytoplasm);GO:0005829(cytosol);GO:0006351(transcription, DNA-templated);GO:0006559(L-phenylalanine catabolic process);GO:0006729(tetrahydrobiopterin biosynthetic process);GO:0008124(4-alpha-hydroxytetrahydrobiopterin dehydratase activity)…	00230(Purine metabolism);00240(Pyrimidine metabolism);03020(RNA polymerase)	K03005	NA	PREDICTED: Capra hircus pterin-4 alpha-carbinolamine dehydratase 1 (PCBD1), mRNA	170.583	172.618	189.838	140.557	175.883	169.896
MSTRG.3399	chrNC_030814.1	66666943	66669986	+	GAMT	MSTRG.3399.1;MSTRG.3399.2;XM_018050447.1	GO:0005634(nucleus);GO:0005737(cytoplasm);GO:0006601(creatine biosynthetic process);GO:0007283(spermatogenesis);GO:0009887(organ morphogenesis);GO:0030731(guanidinoacetate N-methyltransferase activity);GO:0032259(methylation);GO:0040014(regulation of multicellular organism growth);GO:0046498(S-adenosylhomocysteine metabolic process);GO:0046500(S-adenosylmethionine metabolic process);GO:0070062(ex…	00260(Glycine, serine and threonine metabolism);00330(Arginine and proline metabolism)	K00542	EC:2.1.1.2	PREDICTED: Capra hircus guanidinoacetate N-methyltransferase (GAMT), mRNA	198.018	197.22	183.5	129.485	134.386	168.522
MSTRG.12275	chrNC_030836.1	46486739	46489886	+	LOC100861197	XM_018043050.1	GO:0004364(glutathione transferase activity);GO:0005615(extracellular space);GO:0005634(nucleus);GO:0005739(mitochondrion);GO:0006749(glutathione metabolic process);GO:0006805(xenobiotic metabolic process);GO:0032691(negative regulation of interleukin-1 beta production);GO:0032720(negative regulation of tumor necrosis factor production);GO:0035730(S-nitrosoglutathione binding);GO:0035731(dinitros…	00480(Glutathione metabolism);00980(Metabolism of xenobiotics by cytochrome P450);00982(Drug metabolism - cytochrome P450);05204(Chemical carcinogenesis)	K00799	EC:2.5.1.18	PREDICTED: Capra hircus glutathione S-transferase P-like (LOC100861197), mRNA	188.115	133.294	159.322	156.221	199.525	167.295
MSTRG.7365	chrNC_030824.1	68860	69744	-	MIF	XM_018060897.1	GO:0001516(prostaglandin biosynthetic process);GO:0002906(negative regulation of mature B cell apoptotic process);GO:0004167(dopachrome isomerase activity);GO:0005125(cytokine activity);GO:0005126(cytokine receptor binding);GO:0005615(extracellular space);GO:0005654(nucleoplasm);GO:0005737(cytoplasm);GO:0007166(cell surface receptor signaling pathway);GO:0007569(cell aging);GO:0008283(cell prolif…	00350(Tyrosine metabolism);00360(Phenylalanine metabolism)	K07253	EC:5.3.2.1	PREDICTED: Capra hircus macrophage migration inhibitory factor (glycosylation-inhibiting factor) (MIF), mRNA	148.988	143.845	143.886	166.361	231.064	166.829
MSTRG.6862	chrNC_030822.1	48651348	48655824	+	HSPA8	XM_005689565.3;MSTRG.6862.4;NM_001314233.1;MSTRG.6862.2;MSTRG.6862.3	GO:0000151(ubiquitin ligase complex);GO:0000974(Prp19 complex);GO:0001664(G-protein coupled receptor binding);GO:0001786(phosphatidylserine binding);GO:0005515(protein binding);GO:0005524(ATP binding);GO:0005634(nucleus);GO:0005681(spliceosomal complex);GO:0005730(nucleolus);GO:0005770(late endosome);GO:0005829(cytosol);GO:0005886(plasma membrane);GO:0005925(focal adhesion);GO:0006351(transcripti…	03040(Spliceosome);04141(Protein processing in endoplasmic reticulum);04010(MAPK signaling pathway);04144(Endocytosis);04612(Antigen processing and presentation);04915(Estrogen signaling pathway);04213(Longevity regulating pathway - multiple species);05134(Legionellosis);05162(Measles);05164(Influenza A);05169(Epstein-Barr virus infection);05145(Toxoplasmosis);05145(Toxoplasmosis)	K03283	NA	PREDICTED: Capra hircus heat shock protein family A (Hsp70) member 8 (HSPA8), transcript variant X1, mRNA;Capra hircus heat shock protein family A (Hsp70) member 8 (HSPA8), mRNA	140.172	178.985	169.659	186.067	151.351	165.247
MSTRG.12492	chrNW_017189517.1	2200001	2200579	+	LOC108634465	XM_018044256.1	GO:0003735(structural constituent of ribosome);GO:0006412(translation);GO:0022625(cytosolic large ribosomal subunit)	03010(Ribosome)	K02889	NA	PREDICTED: Capra hircus 60S ribosomal protein L21 (LOC108634465), mRNA	162.806	180.173	177.9	149.894	152.805	164.715
MSTRG.6114	chrNC_030820.1	58050187	58065874	-	RBM38	XM_018057629.1	GO:0000166(nucleotide binding);GO:0003730(mRNA 3'-UTR binding);GO:0005634(nucleus);GO:0005829(cytosol);GO:0006977(DNA damage response, signal transduction by p53 class mediator resulting in cell cycle arrest);GO:0006978(DNA damage response, signal transduction by p53 class mediator resulting in transcription of p21 class mediator);GO:0007050(cell cycle arrest);GO:0008285(negative regulation of ce…	03015(mRNA surveillance pathway)	K14411	NA	PREDICTED: Capra hircus RNA binding motif protein 38 (RBM38), mRNA	172.84	168.172	194.707	136.253	151.109	164.616
MSTRG.6157	chrNC_030820.1	61992831	62003061	+	LOC102171351	XM_018057719.1	GO:0008289(lipid binding)	NA	NA	NA	PREDICTED: Capra hircus short palate, lung and nasal epithelium carcinoma-associated protein 2B (LOC102171351), mRNA	115.447	218.532	126.657	134.738	214.046	161.884
MSTRG.1114	chrNC_030810.1	13827869	13833212	+	NDUFS5	XM_005678668.2	GO:0005747(mitochondrial respiratory chain complex I);GO:0005758(mitochondrial intermembrane space);GO:0032981(mitochondrial respiratory chain complex I assembly);GO:0055114(oxidation-reduction process)	00190(Oxidative phosphorylation);05010(Alzheimer's disease);05012(Parkinson's disease);05016(Huntington's disease);04932(Non-alcoholic fatty liver disease (NAFLD))	K03938	NA	PREDICTED: Capra hircus NADH:ubiquinone oxidoreductase subunit S5 (NDUFS5), mRNA	147.907	143.577	150.511	164.387	199.079	161.092
MSTRG.4488	chrNC_030816.1	83879697	83927836	-	PLG	MSTRG.4488.2;MSTRG.4488.3;MSTRG.4488.1;XM_005684954.3	GO:0004252(serine-type endopeptidase activity);GO:0005576(extracellular region);GO:0006508(proteolysis);GO:0007596(blood coagulation);GO:0019897(extrinsic component of plasma membrane);GO:0042246(tissue regeneration);GO:0042730(fibrinolysis);GO:0045445(myoblast differentiation);GO:0046716(muscle cell cellular homeostasis);GO:0048771(tissue remodeling);GO:0060707(trophoblast giant cell differentia…	04080(Neuroactive ligand-receptor interaction);04610(Complement and coagulation cascades);05150(Staphylococcus aureus infection);05164(Influenza A)	K01315	EC:3.4.21.7	PREDICTED: Capra hircus plasminogen (PLG), mRNA	168.648	186.149	192.175	149.834	108.423	161.046
MSTRG.1960	chrNC_030811.1	43460693	43464662	+	PPIA	XM_018047035.1;MSTRG.1960.2;XM_018047036.1	GO:0000413(protein peptidyl-prolyl isomerization);GO:0003755(peptidyl-prolyl cis-trans isomerase activity);GO:0005576(extracellular region);GO:0005634(nucleus);GO:0005829(cytosol);GO:0006457(protein folding);GO:0042277(peptide binding);GO:0045069(regulation of viral genome replication);GO:0045069(regulation of viral genome replication)	04020(Calcium signaling pathway);04020(Calcium signaling pathway)	K09565	EC:5.2.1.8	PREDICTED: Capra hircus peptidylprolyl isomerase A (PPIA), transcript variant X1, mRNA;PREDICTED: Capra hircus peptidylprolyl isomerase A (PPIA), transcript variant X2, mRNA	162.984	169.817	159.693	128.234	177.639	159.673
MSTRG.3407	chrNC_030814.1	66891529	66893834	-	GPX4	MSTRG.3407.1;NM_001285712.1	GO:0004602(glutathione peroxidase activity);GO:0005739(mitochondrion);GO:0006979(response to oxidative stress);GO:0007275(multicellular organism development);GO:0047066(phospholipid-hydroperoxide glutathione peroxidase activity);GO:0055114(oxidation-reduction process)	00480(Glutathione metabolism)	K05361	EC:1.11.1.12	Capra hircus glutathione peroxidase 4 (GPX4), mRNA	130.072	136.696	142.882	201.35	187.288	159.658
MSTRG.10798	chrNC_030831.1	49347697	49352278	-	LOC100861018	MSTRG.10798.1;MSTRG.10798.2;XM_005697189.3	GO:0003735(structural constituent of ribosome);GO:0006412(translation);GO:0015934(large ribosomal subunit)	03010(Ribosome)	K02880	NA	PREDICTED: Capra hircus 60S ribosomal protein L17 (LOC100861018), mRNA	110.076	173.955	168.461	180.38	162.046	158.983
MSTRG.11629	chrNC_030834.1	3606165	3610144	+	RPL15	XM_018041842.1;XM_018041843.1	GO:0003735(structural constituent of ribosome);GO:0005634(nucleus);GO:0006412(translation);GO:0022625(cytosolic large ribosomal subunit);GO:0044822(poly(A) RNA binding);GO:0070062(extracellular exosome);GO:0070062(extracellular exosome)	03010(Ribosome);03010(Ribosome)	K02877	NA	PREDICTED: Capra hircus ribosomal protein L15 (RPL15), transcript variant X1, mRNA;PREDICTED: Capra hircus ribosomal protein L15 (RPL15), transcript variant X2, mRNA	163.259	177.94	170.233	122.789	155.227	157.889
MSTRG.12633	chrNW_017189536.1	16226	17866	+		MSTRG.12633.1	NA	NA	NA	NA		153.772	140.222	138.183	238.768	112.336	156.656
MSTRG.6771	chrNC_030822.1	31955085	31958609	-	LOC102178093	MSTRG.6771.2;MSTRG.6771.1;XM_018059421.1;XM_018059422.1	GO:0003956(NAD(P)+-protein-arginine ADP-ribosyltransferase activity);GO:0006471(protein ADP-ribosylation);GO:0006471(protein ADP-ribosylation)	00760(Nicotinate and nicotinamide metabolism);00760(Nicotinate and nicotinamide metabolism)	K19980	EC:2.4.2.31;EC:3.2.2.5	PREDICTED: Capra hircus ecto-ADP-ribosyltransferase 5 (LOC102178093), transcript variant X1, mRNA;PREDICTED: Capra hircus ecto-ADP-ribosyltransferase 5 (LOC102178093), transcript variant X2, mRNA	125.241	152.022	158.164	203.266	143.353	156.409
MSTRG.10137	chrNC_030829.1	51478200	51480196	-	LOC102190274	MSTRG.10137.1;XR_001917021.1	NA	NA	NA	NA	PREDICTED: Capra hircus uncharacterized LOC102190274 (LOC102190274), ncRNA	136.619	150.78	126.581	204.997	154.763	154.748
MSTRG.2470	chrNC_030812.1	66288024	66306511	+	HSP90B1	XM_018048184.1;MSTRG.2470.2	GO:0030433(ER-associated ubiquitin-dependent protein catabolic process)	04141(Protein processing in endoplasmic reticulum);04621(NOD-like receptor signaling pathway)	K09487	NA	PREDICTED: Capra hircus heat shock protein 90 beta family member 1 (HSP90B1), mRNA	157.643	159.265	147.726	140.121	166.509	154.253
MSTRG.983	chrNC_030809.1	131423694	131434165	+	PROC	XM_018065804.1;XM_018065808.1;XM_018065812.1;MSTRG.983.10;MSTRG.983.11;MSTRG.983.4;MSTRG.983.5;MSTRG.983.6;MSTRG.983.7;MSTRG.983.8;MSTRG.983.9;XM_018065813.1;XM_018065814.1;XM_018065815.1;XM_018065818.1;MSTRG.983.16;MSTRG.983.17;XM_018065820.1	GO:0004252(serine-type endopeptidase activity);GO:0005509(calcium ion binding);GO:0005576(extracellular region);GO:0006508(proteolysis);GO:0007596(blood coagulation);GO:0007596(blood coagulation)	04610(Complement and coagulation cascades);04610(Complement and coagulation cascades)	K01344	EC:3.4.21.69	PREDICTED: Capra hircus protein C, inactivator of coagulation factors Va and VIIIa (PROC), transcript variant X1, mRNA;PREDICTED: Capra hircus protein C, inactivator of coagulation factors Va and VIIIa (PROC), transcript variant X2, mRNA;PREDICTED: Capra hircus protein C, inactivator of coagulation factors Va and VIIIa (PROC), transcript variant X3, mRNA;PREDICTED: Capra hircus protein C, inactiv…	154.723	155.343	158.211	179.747	119.199	153.445
MSTRG.9747	chrNC_030828.1	58661454	58674311	+	SERPINA5	XM_005695358.3;MSTRG.9747.2	GO:0001972(retinoic acid binding);GO:0002020(protease binding);GO:0002080(acrosomal membrane);GO:0004867(serine-type endopeptidase inhibitor activity);GO:0005615(extracellular space);GO:0006869(lipid transport);GO:0007283(spermatogenesis);GO:0007338(single fertilization);GO:0008201(heparin binding);GO:0009897(external side of plasma membrane);GO:0010951(negative regulation of endopeptidase activi…	04610(Complement and coagulation cascades)	K03913	NA	PREDICTED: Capra hircus serpin family A member 5 (SERPINA5), mRNA	173.179	182.758	166.573	112.025	130.652	153.038
MSTRG.3763	chrNC_030814.1	98151727	98154850	+	C7H19orf43	XM_018051268.1;XM_018051269.1;MSTRG.3763.2	GO:0003674(molecular_function);GO:0005575(cellular_component);GO:0008150(biological_process);GO:0008150(biological_process)	NA	NA	NA	PREDICTED: Capra hircus chromosome 7 C19orf43 homolog (C7H19orf43), transcript variant X1, mRNA;PREDICTED: Capra hircus chromosome 7 C19orf43 homolog (C7H19orf43), transcript variant X2, mRNA	146.251	153.747	159.069	149.026	155.92	152.803
MSTRG.13068	chrNW_017215042.1	6211	6746	-		MSTRG.13068.1	NA	NA	NA	NA		314.992	443.605	0	0	0	151.719
MSTRG.8466	chrNC_030825.1	65561896	65584443	-	PEG3	MSTRG.8466.3;MSTRG.8466.10;XM_018063410.1;MSTRG.8466.7;MSTRG.8466.11;MSTRG.8466.5;MSTRG.8466.1;MSTRG.8466.2;MSTRG.8466.4;MSTRG.8466.6;MSTRG.8466.8;MSTRG.8466.9;XM_018063405.1;XM_018063406.1;XM_018063407.1;XM_018063408.1;XM_018063409.1;MSTRG.8466.19;MSTRG.8466.20;MSTRG.8466.18;MSTRG.8466.21;MSTRG.8466.22	GO:0000981(RNA polymerase II transcription factor activity, sequence-specific DNA binding);GO:0005634(nucleus);GO:0005634(nucleus)	04722(Neurotrophin signaling pathway);04974(Protein digestion and absorption);04974(Protein digestion and absorption)	K19721;K12458	NA	PREDICTED: Capra hircus paternally expressed 3 (PEG3), transcript variant X6, mRNA;PREDICTED: Capra hircus paternally expressed 3 (PEG3), transcript variant X1, mRNA;PREDICTED: Capra hircus paternally expressed 3 (PEG3), transcript variant X2, mRNA;PREDICTED: Capra hircus paternally expressed 3 (PEG3), transcript variant X3, mRNA;PREDICTED: Capra hircus paternally expressed 3 (PEG3), transcript v…	100.649	199.523	177.593	104.404	171.001	150.634
MSTRG.2816	chrNC_030812.1	118739536	118742312	+	MIOX	MSTRG.2816.1;XM_018048982.1	GO:0005737(cytoplasm);GO:0008199(ferric iron binding);GO:0019310(inositol catabolic process);GO:0050113(inositol oxygenase activity);GO:0055114(oxidation-reduction process)	00053(Ascorbate and aldarate metabolism);00562(Inositol phosphate metabolism)	K00469	EC:1.13.99.1	PREDICTED: Capra hircus myo-inositol oxygenase (MIOX), mRNA	86.6703	162.739	180.845	157.203	148.286	147.149
MSTRG.9146	chrNC_030826.1	50405062	50415000	+	P4HB	XM_005694059.3;MSTRG.9146.2	GO:0003756(protein disulfide isomerase activity);GO:0004656(procollagen-proline 4-dioxygenase activity);GO:0005178(integrin binding);GO:0005793(endoplasmic reticulum-Golgi intermediate compartment);GO:0005925(focal adhesion);GO:0006457(protein folding);GO:0009897(external side of plasma membrane);GO:0016222(procollagen-proline 4-dioxygenase complex);GO:0018401(peptidyl-proline hydroxylation to 4-…	04141(Protein processing in endoplasmic reticulum)	K09580	EC:5.3.4.1	PREDICTED: Capra hircus prolyl 4-hydroxylase subunit beta (P4HB), mRNA	177.251	143.766	159.363	142.346	106.08	145.761
MSTRG.12040	chrNC_030836.1	32617056	32617972	-	LOC102171034	XR_311205.3	GO:0003729(mRNA binding);GO:0003735(structural constituent of ribosome);GO:0005654(nucleoplasm);GO:0005925(focal adhesion);GO:0006412(translation);GO:0016020(membrane);GO:0017134(fibroblast growth factor binding);GO:0019899(enzyme binding);GO:0022627(cytosolic small ribosomal subunit);GO:0051347(positive regulation of transferase activity);GO:0070062(extracellular exosome)	03010(Ribosome)	K02981	NA	PREDICTED: Capra hircus 40S ribosomal protein S2 pseudogene (LOC102171034), misc_RNA	46.1603	222.223	231.946	22.9742	200.477	144.756
MSTRG.10926	chrNC_030832.1	2170432	2174774	+	TCEB2	XM_018040152.1	GO:0003746(translation elongation factor activity);GO:0006368(transcription elongation from RNA polymerase II promoter);GO:0006414(translational elongation);GO:0030891(VCB complex);GO:0070449(elongin complex)	04120(Ubiquitin mediated proteolysis);04066(HIF-1 signaling pathway);05200(Pathways in cancer);05211(Renal cell carcinoma)	K03873	NA	PREDICTED: Capra hircus transcription elongation factor B subunit 2 (TCEB2), mRNA	134.451	125.783	127.934	159.066	173.701	144.187
MSTRG.5347	chrNC_030818.1	68140769	68142511	+	PCBP1	XM_005686838.3	GO:0003697(single-stranded DNA binding);GO:0003723(RNA binding);GO:0005634(nucleus);GO:0005737(cytoplasm);GO:0030529(intracellular ribonucleoprotein complex)	03040(Spliceosome)	K12889	NA	PREDICTED: Capra hircus poly(rC) binding protein 1 (PCBP1), mRNA	143.679	151.316	148.471	135.745	133.649	142.572
MSTRG.12589	chrNW_017189517.1	40653027	40656312	+	RPL36A	XM_005700144.2;MSTRG.12589.2	GO:0003735(structural constituent of ribosome);GO:0005840(ribosome);GO:0006412(translation)	03010(Ribosome)	K02929	NA	PREDICTED: Capra hircus ribosomal protein L36a (RPL36A), mRNA	122.328	138.737	131.107	145.704	169.927	141.561
MSTRG.7257	chrNC_030823.1	53789277	53799979	-	SERPINC1	MSTRG.7257.2;MSTRG.7257.1;XM_005690896.2	GO:0002020(protease binding);GO:0004867(serine-type endopeptidase inhibitor activity);GO:0008201(heparin binding);GO:0010951(negative regulation of endopeptidase activity);GO:0070062(extracellular exosome);GO:0072562(blood microparticle);GO:2000266(regulation of blood coagulation, intrinsic pathway)	04610(Complement and coagulation cascades)	K03911	NA	PREDICTED: Capra hircus serpin family C member 1 (SERPINC1), mRNA	152.662	178.002	180.057	105.286	90.8789	141.377
MSTRG.7075	chrNC_030823.1	27403098	27441537	+	EPHX1	MSTRG.7075.1;XM_013970075.2;XM_018059920.1;XM_013970074.2;NM_001285557.1	GO:0006725(cellular aromatic compound metabolic process);GO:0014070(response to organic cyclic compound);GO:0033961(cis-stilbene-oxide hydrolase activity);GO:0033961(cis-stilbene-oxide hydrolase activity)	00980(Metabolism of xenobiotics by cytochrome P450);04976(Bile secretion);05204(Chemical carcinogenesis);05204(Chemical carcinogenesis)	K01253	EC:3.3.2.9	PREDICTED: Capra hircus epoxide hydrolase 1 (EPHX1), transcript variant X3, mRNA;PREDICTED: Capra hircus epoxide hydrolase 1 (EPHX1), transcript variant X1, mRNA;PREDICTED: Capra hircus epoxide hydrolase 1 (EPHX1), transcript variant X2, mRNA;Capra hircus epoxide hydrolase 1 (EPHX1), mRNA	165.485	149.578	143.317	111.732	128.363	139.695
MSTRG.6681	chrNC_030822.1	17920347	17956943	-	CAT	XM_005690077.3;MSTRG.6681.1	GO:0001649(osteoblast differentiation);GO:0004046(aminoacylase activity);GO:0004096(catalase activity);GO:0005102(receptor binding);GO:0005739(mitochondrion);GO:0005777(peroxisome);GO:0005778(peroxisomal membrane);GO:0005925(focal adhesion);GO:0006641(triglyceride metabolic process);GO:0008203(cholesterol metabolic process);GO:0009060(aerobic respiration);GO:0009650(UV protection);GO:0014068(posi…	01200(Carbon metabolism);00630(Glyoxylate and dicarboxylate metabolism);00380(Tryptophan metabolism);04068(FoxO signaling pathway);04146(Peroxisome);04211(Longevity regulating pathway - mammal);04213(Longevity regulating pathway - multiple species);05014(Amyotrophic lateral sclerosis (ALS))	K03781	EC:1.11.1.6	PREDICTED: Capra hircus catalase (CAT), mRNA	149.738	123.25	250.872	87.8079	81.3561	138.605
MSTRG.8612	chrNC_030826.1	19008034	19106187	+	LOC106503912;LOC102187127	MSTRG.8612.2;MSTRG.8612.1;MSTRG.8612.4;MSTRG.8612.5;MSTRG.8612.3;XM_018064285.1;XM_018064284.1;MSTRG.8612.8;XM_018064287.1;MSTRG.8612.10;MSTRG.8612.11;XM_018064288.1	GO:0030246(carbohydrate binding);GO:0030246(carbohydrate binding)	NA	NA	NA	PREDICTED: Capra hircus galectin-9B-like (LOC106503912), transcript variant X2, mRNA;PREDICTED: Capra hircus galectin-9B-like (LOC106503912), transcript variant X1, mRNA;PREDICTED: Capra hircus galectin-9 (LOC102187127), transcript variant X1, mRNA;PREDICTED: Capra hircus galectin-9 (LOC102187127), transcript variant X2, mRNA	116.112	125.931	147.935	134.057	166.117	138.03
MSTRG.9141	chrNC_030826.1	50368071	50373189	-	ANAPC11	MSTRG.9141.1;XM_018065456.1;XM_018065455.1	GO:0005680(anaphase-promoting complex);GO:0042787(protein ubiquitination involved in ubiquitin-dependent protein catabolic process);GO:0045842(positive regulation of mitotic metaphase/anaphase transition);GO:0061630(ubiquitin protein ligase activity);GO:0097602(cullin family protein binding);GO:0097602(cullin family protein binding)	04120(Ubiquitin mediated proteolysis);04110(Cell cycle);04114(Oocyte meiosis);04914(Progesterone-mediated oocyte maturation);05166(HTLV-I infection);05166(HTLV-I infection)	K03358	NA	PREDICTED: Capra hircus anaphase promoting complex subunit 11 (ANAPC11), transcript variant X2, mRNA;PREDICTED: Capra hircus anaphase promoting complex subunit 11 (ANAPC11), transcript variant X1, mRNA	127.412	141.156	152.369	118.201	143.688	136.565
MSTRG.800	chrNC_030809.1	41428132	41431033	-	EEF1B2	NM_001314314.1	GO:0003746(translation elongation factor activity);GO:0005783(endoplasmic reticulum);GO:0005853(eukaryotic translation elongation factor 1 complex);GO:0006414(translational elongation)	00970(Aminoacyl-tRNA biosynthesis)	K01890	EC:6.1.1.20	Capra hircus eukaryotic translation elongation factor 1 beta 2 (EEF1B2), mRNA	141.776	143.532	151.055	100.131	132.197	133.738
MSTRG.10460	chrNC_030830.1	22553205	22559438	+	CFB	MSTRG.10460.1;MSTRG.10460.2;MSTRG.10460.3;MSTRG.10460.4;XM_018038701.1	GO:0004252(serine-type endopeptidase activity);GO:0005576(extracellular region);GO:0006508(proteolysis);GO:0006957(complement activation, alternative pathway)	04610(Complement and coagulation cascades);05150(Staphylococcus aureus infection)	K01335	EC:3.4.21.47	PREDICTED: Capra hircus complement factor B (CFB), mRNA	202.899	148.14	135.98	113.796	63.4178	132.847
MSTRG.1406	chrNC_030810.1	81708911	81709619	+		MSTRG.1406.1	NA	NA	NA	NA		0.402388	0.972958	658.214	0	1.86418	132.291
MSTRG.6997	chrNC_030823.1	2407126	2445248	+	TMCC2	XM_018060046.1;MSTRG.6997.2;MSTRG.6997.3;MSTRG.6997.4	GO:0016021(integral component of membrane)	NA	NA	NA	PREDICTED: Capra hircus transmembrane and coiled-coil domain family 2 (TMCC2), mRNA	125.909	130.541	156.615	108.929	137.866	131.972
MSTRG.12328	chrNC_030836.1	50723504	50732855	+	CTSD	MSTRG.12328.1;XM_018043344.1	GO:0000045(autophagosome assembly);GO:0004190(aspartic-type endopeptidase activity);GO:0005739(mitochondrion);GO:0005764(lysosome);GO:0006508(proteolysis)	04071(Sphingolipid signaling pathway);04142(Lysosome);04210(Apoptosis);05152(Tuberculosis)	K01379	EC:3.4.23.5	PREDICTED: Capra hircus cathepsin D (CTSD), mRNA	163.384	109.07	135.342	128.202	118.711	130.942
MSTRG.44	chrNC_030808.1	9102534	9110466	+	ATP5J	XM_005674730.3;XM_005674729.2	GO:0000276(mitochondrial proton-transporting ATP synthase complex, coupling factor F(o));GO:0015078(hydrogen ion transmembrane transporter activity);GO:0015986(ATP synthesis coupled proton transport);GO:0015986(ATP synthesis coupled proton transport)	00190(Oxidative phosphorylation);05010(Alzheimer's disease);05012(Parkinson's disease);05016(Huntington's disease);05016(Huntington's disease)	K02131	NA	PREDICTED: Capra hircus ATP synthase, H+ transporting, mitochondrial Fo complex subunit F6 (ATP5J), transcript variant X2, mRNA;PREDICTED: Capra hircus ATP synthase, H+ transporting, mitochondrial Fo complex subunit F6 (ATP5J), transcript variant X1, mRNA	124.917	128.583	125.77	134.158	139.734	130.633
MSTRG.9787	chrNC_030828.1	64899151	64907338	+	DLK1	XM_018065822.1;XM_018065823.1;XM_018065824.1;XM_018065825.1;XM_018065826.1;MSTRG.9787.6;NM_001314212.1	GO:0005509(calcium ion binding);GO:0005615(extracellular space);GO:0016021(integral component of membrane);GO:0045746(negative regulation of Notch signaling pathway);GO:0045746(negative regulation of Notch signaling pathway)	04330(Notch signaling pathway);04330(Notch signaling pathway)	K06051	NA	PREDICTED: Capra hircus delta like non-canonical Notch ligand 1 (DLK1), transcript variant X1, mRNA;PREDICTED: Capra hircus delta like non-canonical Notch ligand 1 (DLK1), transcript variant X2, mRNA;PREDICTED: Capra hircus delta like non-canonical Notch ligand 1 (DLK1), transcript variant X3, mRNA;PREDICTED: Capra hircus delta like non-canonical Notch ligand 1 (DLK1), transcript variant X4, mRNA…	142.538	137.314	120.644	134.83	117.118	130.489
MSTRG.3492	chrNC_030814.1	79869796	79870245	+	LOC102173562	XM_018050680.1	GO:0004129(cytochrome-c oxidase activity);GO:0005743(mitochondrial inner membrane);GO:0016021(integral component of membrane);GO:0045277(respiratory chain complex IV);GO:1902600(hydrogen ion transmembrane transport)	00190(Oxidative phosphorylation);04260(Cardiac muscle contraction);05010(Alzheimer's disease);05012(Parkinson's disease);05016(Huntington's disease);04932(Non-alcoholic fatty liver disease (NAFLD))	K02272	NA	PREDICTED: Capra hircus cytochrome c oxidase subunit 7C, mitochondrial (LOC102173562), mRNA	107.167	124.491	121.686	147.865	150.61	130.364
MSTRG.4744	chrNC_030817.1	56223043	56226522	-	RPS27L	XM_005685681.3	GO:0000028(ribosomal small subunit assembly);GO:0003735(structural constituent of ribosome);GO:0006412(translation);GO:0022627(cytosolic small ribosomal subunit)	03010(Ribosome)	K02978	NA	PREDICTED: Capra hircus ribosomal protein S27 like (RPS27L), mRNA	127.055	125.003	130.232	129.599	138.643	130.106
MSTRG.9753	chrNC_030828.1	58747787	58843792	-	LOC102174926;LOC102175387;LOC102174605	MSTRG.9753.1;MSTRG.9753.3;MSTRG.9753.2;MSTRG.9753.4;MSTRG.9753.5;MSTRG.9753.8;MSTRG.9753.6;MSTRG.9753.7;MSTRG.9753.9;MSTRG.9753.10;XM_018066378.1;MSTRG.9753.12;MSTRG.9753.13;XM_005701462.3;MSTRG.9753.14;XM_018066379.1;XM_005695361.3	GO:0004867(serine-type endopeptidase inhibitor activity);GO:0005615(extracellular space);GO:0010951(negative regulation of endopeptidase activity);GO:0005615(extracellular space)	04610(Complement and coagulation cascades);04610(Complement and coagulation cascades)	K03984	NA	PREDICTED: Capra hircus serpin A3-5-like (LOC102175387), mRNA;PREDICTED: Capra hircus serpin A3-7 (LOC102174926), transcript variant X1, mRNA;PREDICTED: Capra hircus serpin A3-7 (LOC102174926), transcript variant X2, mRNA;PREDICTED: Capra hircus serpin A3-8 (LOC102174605), mRNA	163.894	135.673	139.012	77.3462	134.252	130.035
MSTRG.8573	chrNC_030826.1	14111554	14118670	+	CCL16	MSTRG.8573.1;MSTRG.8573.2;XM_005701404.3;MSTRG.8573.4;MSTRG.8573.3;MSTRG.8573.5	GO:0002548(monocyte chemotaxis);GO:0005615(extracellular space);GO:0006954(inflammatory response);GO:0007186(G-protein coupled receptor signaling pathway);GO:0008009(chemokine activity);GO:0030593(neutrophil chemotaxis);GO:0042056(chemoattractant activity);GO:0043547(positive regulation of GTPase activity);GO:0048020(CCR chemokine receptor binding);GO:0048247(lymphocyte chemotaxis);GO:0050729(pos…	04060(Cytokine-cytokine receptor interaction);04062(Chemokine signaling pathway)	K05514	NA	PREDICTED: Capra hircus C-C motif chemokine ligand 16 (CCL16), mRNA	143.469	147.579	123.534	115.345	119.212	129.828
MSTRG.12392	chrNW_017189516.1	21026975	21033705	+	GATA1	MSTRG.12392.1;XM_018043633.1	GO:0000122(negative regulation of transcription from RNA polymerase II promoter);GO:0000977(RNA polymerase II regulatory region sequence-specific DNA binding);GO:0000978(RNA polymerase II core promoter proximal region sequence-specific DNA binding);GO:0000979(RNA polymerase II core promoter sequence-specific DNA binding);GO:0001077(transcriptional activator activity, RNA polymerase II core promot…	05321(Inflammatiory bowel disease (IBD))	K17895	NA	PREDICTED: Capra hircus GATA binding protein 1 (GATA1), mRNA	122.832	137.109	141.649	115.786	131.111	129.697
MSTRG.1131	chrNC_030810.1	17249139	17268236	+	YBX1	XM_018042673.1;XM_018042676.1;MSTRG.1131.3	GO:0003677(DNA binding);GO:0006355(regulation of transcription, DNA-templated);GO:0006355(regulation of transcription, DNA-templated)	04530(Tight junction);04530(Tight junction)	K06099	NA	PREDICTED: Capra hircus Y-box binding protein 1 (YBX1), transcript variant X1, mRNA;PREDICTED: Capra hircus Y-box binding protein 1 (YBX1), transcript variant X2, mRNA	128.459	141.512	135.778	104.015	129.985	127.95
MSTRG.12195	chrNC_030836.1	44381782	44385360	-	CFL1	XM_018043098.1	GO:0003779(actin binding);GO:0005615(extracellular space);GO:0005737(cytoplasm);GO:0005925(focal adhesion);GO:0007010(cytoskeleton organization);GO:0009615(response to virus);GO:0015629(actin cytoskeleton);GO:0016363(nuclear matrix);GO:0022604(regulation of cell morphogenesis);GO:0030042(actin filament depolymerization);GO:0031258(lamellipodium membrane);GO:0032587(ruffle membrane);GO:0044794(pos…	04810(Regulation of actin cytoskeleton);04666(Fc gamma R-mediated phagocytosis);04360(Axon guidance);05133(Pertussis)	K05765	NA	PREDICTED: Capra hircus cofilin 1 (CFL1), mRNA	153.769	138.46	135.924	86.4536	124.324	127.786
MSTRG.3556	chrNC_030814.1	90521523	90530383	-	EEF2	MSTRG.3556.2;MSTRG.3556.1;XM_005682572.3	GO:0002244(hematopoietic progenitor cell differentiation);GO:0003746(translation elongation factor activity);GO:0003924(GTPase activity);GO:0005525(GTP binding);GO:0005622(intracellular);GO:0005634(nucleus);GO:0005737(cytoplasm);GO:0005844(polysome);GO:0005886(plasma membrane);GO:0006412(translation);GO:0006414(translational elongation);GO:0016235(aggresome);GO:0019901(protein kinase binding);GO:…	04152(AMPK signaling pathway);04921(Oxytocin signaling pathway)	K03234	NA	PREDICTED: Capra hircus eukaryotic translation elongation factor 2 (EEF2), mRNA	132.553	135.788	139.052	102.199	122.531	126.424
MSTRG.8690	chrNC_030826.1	22629867	22637599	+	SERPINF2	MSTRG.8690.1;MSTRG.8690.2;MSTRG.8690.3;MSTRG.8690.4;MSTRG.8690.5;MSTRG.8690.6;MSTRG.8690.7;MSTRG.8690.8;MSTRG.8690.9;XM_005693314.3;XM_005693315.3;MSTRG.8690.12;XM_018064401.1	GO:0002020(protease binding);GO:0002034(regulation of blood vessel size by renin-angiotensin);GO:0004867(serine-type endopeptidase inhibitor activity);GO:0005577(fibrinogen complex);GO:0005615(extracellular space);GO:0006953(acute-phase response);GO:0009986(cell surface);GO:0010757(negative regulation of plasminogen activation);GO:0010951(negative regulation of endopeptidase activity);GO:0030199(…	04610(Complement and coagulation cascades);04610(Complement and coagulation cascades)	K03983	NA	PREDICTED: Capra hircus serpin family F member 2 (SERPINF2), transcript variant X1, mRNA;PREDICTED: Capra hircus serpin family F member 2 (SERPINF2), transcript variant X2, mRNA;PREDICTED: Capra hircus serpin family F member 2 (SERPINF2), transcript variant X3, mRNA	137.703	162.184	97.9313	135.518	97.5618	126.18
MSTRG.2583	chrNC_030812.1	95502462	95542185	+	HEBP1	XM_005680810.3	GO:0005737(cytoplasm);GO:0020037(heme binding)	NA	NA	NA	PREDICTED: Capra hircus heme binding protein 1 (HEBP1), mRNA	136.412	112.521	131.308	121.888	128.16	126.058
MSTRG.2277	chrNC_030812.1	30301909	30344895	+	TUBA1A;LOC102178700	XM_018047843.1;MSTRG.2277.1;MSTRG.2277.3;XM_005680002.2	GO:0003924(GTPase activity);GO:0005200(structural constituent of cytoskeleton);GO:0005525(GTP binding);GO:0005634(nucleus);GO:0005881(cytoplasmic microtubule);GO:0007017(microtubule-based process);GO:0036464(cytoplasmic ribonucleoprotein granule);GO:0043209(myelin sheath);GO:0055037(recycling endosome);GO:0070062(extracellular exosome);GO:0000226(microtubule cytoskeleton organization);GO:0003725(…	04145(Phagosome);04210(Apoptosis);04540(Gap junction);05130(Pathogenic Escherichia coli infection);04540(Gap junction)	K07374	NA	PREDICTED: Capra hircus tubulin alpha 1a (TUBA1A), mRNA;PREDICTED: Capra hircus tubulin alpha-1B chain (LOC102178700), mRNA	175.856	100.514	154.267	71.4476	120.28	124.473
MSTRG.8463	chrNC_030825.1	65497787	65498403	+	LOC102189516	MSTRG.8463.1	NA	NA	NA	NA		109.959	111.487	106.268	154.536	138.664	124.183
MSTRG.10258	chrNC_030830.1	4933844	4940628	+	LOC102178029	XM_005696858.3;XM_013974155.2	GO:0005743(mitochondrial inner membrane);GO:0006783(heme biosynthetic process);GO:0006839(mitochondrial transport);GO:0016021(integral component of membrane);GO:0030218(erythrocyte differentiation);GO:0070453(regulation of heme biosynthetic process);GO:0070453(regulation of heme biosynthetic process)	NA	NA	NA	PREDICTED: Capra hircus transmembrane protein 14C (LOC102178029), transcript variant X2, mRNA;PREDICTED: Capra hircus transmembrane protein 14C (LOC102178029), transcript variant X1, mRNA	121.556	146.613	139.382	88.0163	123.387	123.791
MSTRG.223	chrNC_030808.1	80206861	80214843	-	HRG	MSTRG.223.3;MSTRG.223.1;MSTRG.223.2;XM_005675159.3	GO:0002839(positive regulation of immune response to tumor cell);GO:0004869(cysteine-type endopeptidase inhibitor activity);GO:0005102(receptor binding);GO:0008201(heparin binding);GO:0008270(zinc ion binding);GO:0008285(negative regulation of cell proliferation);GO:0010468(regulation of gene expression);GO:0010593(negative regulation of lamellipodium assembly);GO:0010951(negative regulation of e…	NA	NA	NA	PREDICTED: Capra hircus histidine rich glycoprotein (HRG), mRNA	148.992	171.584	157.61	81.9538	58.3829	123.705
MSTRG.7489	chrNC_030824.1	8380112	8382037	-	LOC102172376	XM_018061130.1	GO:0004129(cytochrome-c oxidase activity);GO:0005751(mitochondrial respiratory chain complex IV);GO:1902600(hydrogen ion transmembrane transport)	00190(Oxidative phosphorylation);04260(Cardiac muscle contraction);05010(Alzheimer's disease);05012(Parkinson's disease);05016(Huntington's disease);04932(Non-alcoholic fatty liver disease (NAFLD))	K02266	NA	PREDICTED: Capra hircus cytochrome c oxidase subunit 6A1, mitochondrial (LOC102172376), mRNA	127.777	134.2	144.539	87.9184	122.619	123.411
MSTRG.5483	chrNC_030818.1	95624833	95629167	-	HSPA5	XM_005687138.3;MSTRG.5483.2;NM_001287571.1	GO:0000166(nucleotide binding);GO:0001666(response to hypoxia);GO:0001878(response to yeast);GO:0005524(ATP binding);GO:0005576(extracellular region);GO:0005576(extracellular region)	03060(Protein export);04141(Protein processing in endoplasmic reticulum);04141(Protein processing in endoplasmic reticulum)	K09490	NA	PREDICTED: Capra hircus heat shock protein family A (Hsp70) member 5 (HSPA5), transcript variant X1, mRNA;Capra hircus heat shock protein family A (Hsp70) member 5 (HSPA5), mRNA	128.833	118.468	124.468	123.6	120.598	123.193
MSTRG.8607	chrNC_030826.1	18922190	19035585	+	LOC102187672;LOC102189615;LOC108638256	XM_018064280.1;MSTRG.8607.1;MSTRG.8607.3;XM_018064282.1;XM_018064283.1;MSTRG.8607.6;MSTRG.8607.7;MSTRG.8607.8;XM_018064286.1	GO:0030246(carbohydrate binding);GO:0030246(carbohydrate binding)	NA	NA	NA	PREDICTED: Capra hircus galectin-9-like (LOC102187672), mRNA;PREDICTED: Capra hircus galectin-9 (LOC102189615), transcript variant X1, mRNA;PREDICTED: Capra hircus galectin-9 (LOC102189615), transcript variant X2, mRNA;PREDICTED: Capra hircus galectin-9-like (LOC108638256), mRNA	114.098	153.322	152.222	86.7768	107.141	122.712
MSTRG.5385	chrNC_030818.1	72287736	72289098	+	OST4	XM_005686924.2;XM_005686923.2	GO:0005789(endoplasmic reticulum membrane);GO:0016021(integral component of membrane);GO:0016021(integral component of membrane)	04146(Peroxisome);04146(Peroxisome)	K13355	EC:3.6.1.-	PREDICTED: Capra hircus oligosaccharyltransferase complex subunit 4, non-catalytic (OST4), transcript variant X2, mRNA;PREDICTED: Capra hircus oligosaccharyltransferase complex subunit 4, non-catalytic (OST4), transcript variant X1, mRNA	137.568	130.513	122.65	95.797	126.863	122.678
MSTRG.7163	chrNC_030823.1	43110101	43124014	+	ENO1	XM_018060394.1;XM_018060395.1	GO:0000015(phosphopyruvate hydratase complex);GO:0000287(magnesium ion binding);GO:0004634(phosphopyruvate hydratase activity);GO:0006096(glycolytic process);GO:0006096(glycolytic process)	01200(Carbon metabolism);01230(Biosynthesis of amino acids);00010(Glycolysis / Gluconeogenesis);03018(RNA degradation);04066(HIF-1 signaling pathway);04066(HIF-1 signaling pathway)	K01689	EC:4.2.1.11	PREDICTED: Capra hircus enolase 1 (ENO1), transcript variant X1, mRNA;PREDICTED: Capra hircus enolase 1 (ENO1), transcript variant X2, mRNA	123.663	115.323	117.289	117.529	138.374	122.436
MSTRG.8017	chrNC_030825.1	46605948	46627059	+	HPN	MSTRG.8017.1;XM_018063369.1;MSTRG.8017.3;XM_018063370.1	GO:0004252(serine-type endopeptidase activity);GO:0005737(cytoplasm);GO:0005789(endoplasmic reticulum membrane);GO:0005886(plasma membrane);GO:0005887(integral component of plasma membrane);GO:0005911(cell-cell junction);GO:0006508(proteolysis);GO:0008236(serine-type peptidase activity);GO:0008360(regulation of cell shape);GO:0009986(cell surface);GO:0010628(positive regulation of gene expression…	05203(Viral carcinogenesis);05203(Viral carcinogenesis)	K08665	EC:3.4.21.106	PREDICTED: Capra hircus hepsin (HPN), transcript variant X1, mRNA;PREDICTED: Capra hircus hepsin (HPN), transcript variant X2, mRNA	137.808	117.126	119.699	134.622	94.7274	120.796
MSTRG.3009	chrNC_030813.1	80847215	80847727	+	LOC108636228	XR_001918199.1	GO:0002181(cytoplasmic translation);GO:0003735(structural constituent of ribosome);GO:0005925(focal adhesion);GO:0006414(translational elongation);GO:0022625(cytosolic large ribosomal subunit);GO:0030295(protein kinase activator activity);GO:0030687(preribosome, large subunit precursor);GO:0032147(activation of protein kinase activity);GO:0045860(positive regulation of protein kinase activity);GO…	03010(Ribosome)	K02942	NA	PREDICTED: Capra hircus 60S acidic ribosomal protein P1 pseudogene (LOC108636228), misc_RNA	155.797	77.336	75.9348	187.799	105.168	120.407
MSTRG.2045	chrNC_030811.1	74726766	74727484	+	LOC102168414	XR_001295592.2	GO:0003735(structural constituent of ribosome);GO:0005634(nucleus);GO:0006412(translation);GO:0016020(membrane);GO:0022625(cytosolic large ribosomal subunit);GO:0044822(poly(A) RNA binding)	03010(Ribosome)	K02873	NA	PREDICTED: Capra hircus 60S ribosomal protein L13 pseudogene (LOC102168414), misc_RNA	113.376	122.323	111.544	118.104	136.478	120.365
MSTRG.7082	chrNC_030823.1	27641233	27649632	+	LOC102189503	MSTRG.7082.1;XM_018060224.1	GO:0000786(nucleosome);GO:0003677(DNA binding);GO:0005700(polytene chromosome);GO:0006333(chromatin assembly or disassembly);GO:0007140(male meiosis);GO:0007155(cell adhesion);GO:0008360(regulation of cell shape);GO:0046982(protein heterodimerization activity)	05202(Transcriptional misregulation in cancers);05322(Systemic lupus erythematosus);05034(Alcoholism)	K11253	NA	PREDICTED: Capra hircus histone H3.3 (LOC102189503), mRNA	123.385	129.317	138.966	92.9285	111.826	119.284
MSTRG.10031	chrNC_030829.1	47968434	47987804	+	ITIH4	MSTRG.10031.1;XR_001297127.2;MSTRG.10031.3;MSTRG.10031.4;XM_005695856.3;XM_013973579.2;XM_013973580.2;MSTRG.10031.8;MSTRG.10031.10;MSTRG.10031.11;MSTRG.10031.9	GO:0004867(serine-type endopeptidase inhibitor activity);GO:0005576(extracellular region);GO:0006953(acute-phase response);GO:0010951(negative regulation of endopeptidase activity);GO:0030212(hyaluronan metabolic process);GO:0005737(cytoplasm);GO:0005886(plasma membrane);GO:0034097(response to cytokine);GO:0070062(extracellular exosome);GO:0072562(blood microparticle);GO:0072562(blood micropartic…	04144(Endocytosis);04144(Endocytosis)	K18466	NA	PREDICTED: Capra hircus inter-alpha-trypsin inhibitor heavy chain family member 4 (ITIH4), transcript variant X4, misc_RNA;PREDICTED: Capra hircus inter-alpha-trypsin inhibitor heavy chain family member 4 (ITIH4), transcript variant X1, mRNA;PREDICTED: Capra hircus inter-alpha-trypsin inhibitor heavy chain family member 4 (ITIH4), transcript variant X2, mRNA;PREDICTED: Capra hircus inter-alpha-tr…	149.173	111.599	109.964	135.68	81.5882	117.601
MSTRG.7501	chrNC_030824.1	8980630	8988187	+	ERP29	XM_005691552.3	GO:0000187(activation of MAPK activity);GO:0005524(ATP binding);GO:0005783(endoplasmic reticulum);GO:0005788(endoplasmic reticulum lumen);GO:0006457(protein folding);GO:0006886(intracellular protein transport);GO:0009306(protein secretion);GO:0009986(cell surface);GO:0010628(positive regulation of gene expression);GO:0010629(negative regulation of gene expression);GO:0016020(membrane);GO:0016887(…	04141(Protein processing in endoplasmic reticulum)	K09586	NA	PREDICTED: Capra hircus endoplasmic reticulum protein 29 (ERP29), mRNA	145.27	129.287	125.698	91.1946	96.4643	117.583
MSTRG.8679	chrNC_030826.1	22312742	22347199	-	YWHAE	XM_018064382.1;XM_018064381.1	GO:0001764(neuron migration);GO:0005739(mitochondrion);GO:0005925(focal adhesion);GO:0006605(protein targeting);GO:0015459(potassium channel regulator activity);GO:0016020(membrane);GO:0019904(protein domain specific binding);GO:0021762(substantia nigra development);GO:0021766(hippocampus development);GO:0021987(cerebral cortex development);GO:0023026(MHC class II protein complex binding);GO:0031…	04390(Hippo signaling pathway);04151(PI3K-Akt signaling pathway);04110(Cell cycle);04114(Oocyte meiosis);04722(Neurotrophin signaling pathway);05203(Viral carcinogenesis);05169(Epstein-Barr virus infection);05169(Epstein-Barr virus infection)	K06630	NA	PREDICTED: Capra hircus tyrosine 3-monooxygenase/tryptophan 5-monooxygenase activation protein epsilon (YWHAE), transcript variant X2, mRNA;PREDICTED: Capra hircus tyrosine 3-monooxygenase/tryptophan 5-monooxygenase activation protein epsilon (YWHAE), transcript variant X1, mRNA	111.204	114.213	103.516	100.589	155.554	117.015
MSTRG.10880	chrNC_030832.1	988740	999731	+	GNPTG	XM_018040420.1;MSTRG.10880.2;MSTRG.10880.3;XM_018040422.1	GO:0005794(Golgi apparatus);GO:0042803(protein homodimerization activity);GO:0046835(carbohydrate phosphorylation);GO:0070062(extracellular exosome);GO:0070062(extracellular exosome)	04142(Lysosome);04142(Lysosome)	K10087	NA	PREDICTED: Capra hircus N-acetylglucosamine-1-phosphate transferase gamma subunit (GNPTG), transcript variant X1, mRNA;PREDICTED: Capra hircus N-acetylglucosamine-1-phosphate transferase gamma subunit (GNPTG), transcript variant X2, mRNA	104.571	99.5724	104.679	151.786	123.994	116.92
MSTRG.10622	chrNC_030830.1	40363287	40372174	-	HMGA1	MSTRG.10622.2;MSTRG.10622.1;XM_018039155.1;XM_018039156.1;MSTRG.10622.5	NA	NA	NA	NA	PREDICTED: Capra hircus high mobility group AT-hook 1 (HMGA1), transcript variant X1, mRNA;PREDICTED: Capra hircus high mobility group AT-hook 1 (HMGA1), transcript variant X2, mRNA	132.352	132.947	79.4675	86.1761	151.004	116.389
MSTRG.6362	chrNC_030821.1	14224175	14228968	-	LOC102183616	XM_005689224.3	GO:0005750(mitochondrial respiratory chain complex III);GO:0006122(mitochondrial electron transport, ubiquinol to cytochrome c);GO:0008121(ubiquinol-cytochrome-c reductase activity);GO:0009060(aerobic respiration);GO:0034551(mitochondrial respiratory chain complex III assembly);GO:1902600(hydrogen ion transmembrane transport)	00190(Oxidative phosphorylation);04260(Cardiac muscle contraction);05010(Alzheimer's disease);05012(Parkinson's disease);05016(Huntington's disease);04932(Non-alcoholic fatty liver disease (NAFLD))	K00417	NA	PREDICTED: Capra hircus cytochrome b-c1 complex subunit 7 (LOC102183616), mRNA	91.2927	122.145	130.998	121.918	114.813	116.233
MSTRG.1173	chrNC_030810.1	19735233	19738693	+	UROD	XM_005678547.3;MSTRG.1173.2;MSTRG.1173.3;MSTRG.1173.4;XM_005678549.3;MSTRG.1173.6	GO:0004853(uroporphyrinogen decarboxylase activity);GO:0005654(nucleoplasm);GO:0005829(cytosol);GO:0006782(protoporphyrinogen IX biosynthetic process);GO:0006783(heme biosynthetic process);GO:0006783(heme biosynthetic process)	00860(Porphyrin and chlorophyll metabolism);00860(Porphyrin and chlorophyll metabolism)	K01599	EC:4.1.1.37	PREDICTED: Capra hircus uroporphyrinogen decarboxylase (UROD), transcript variant X1, mRNA;PREDICTED: Capra hircus uroporphyrinogen decarboxylase (UROD), transcript variant X2, mRNA	116.128	107.632	126.272	112.284	113.051	115.073
MSTRG.6911	chrNC_030822.1	54847463	54850797	+	LOC102179867	XM_018058922.1	GO:0005576(extracellular region);GO:0006869(lipid transport);GO:0008289(lipid binding);GO:0042157(lipoprotein metabolic process)	03320(PPAR signaling pathway);04975(Fat digestion and absorption);04977(Vitamin digestion and absorption);05143(African trypanosomiasis)	K08757	NA	PREDICTED: Capra hircus apolipoprotein A-I (LOC102179867), mRNA	107.57	136.553	129.759	88.4581	110.616	114.591
MSTRG.4410	chrNC_030816.1	68460968	68535689	-	SF3B5	MSTRG.4410.1;MSTRG.4410.2;MSTRG.4410.4;MSTRG.4410.3;MSTRG.4410.5;MSTRG.4410.6;XM_005684877.3;XM_005684878.3	GO:0000398(mRNA splicing, via spliceosome);GO:0005686(U2 snRNP);GO:0005689(U12-type spliceosomal complex);GO:0071011(precatalytic spliceosome);GO:0071011(precatalytic spliceosome)	03040(Spliceosome);03040(Spliceosome)	K12832	NA	PREDICTED: Capra hircus splicing factor 3b subunit 5 (SF3B5), transcript variant X1, mRNA;PREDICTED: Capra hircus splicing factor 3b subunit 5 (SF3B5), transcript variant X2, mRNA	115.909	123.343	122.798	104.123	106.239	114.482
MSTRG.2207	chrNC_030812.1	26112613	26120763	+	ATP5G2	XM_018047660.1;MSTRG.2207.2;XM_005679870.3	GO:0008289(lipid binding);GO:0015078(hydrogen ion transmembrane transporter activity);GO:0015986(ATP synthesis coupled proton transport);GO:0015991(ATP hydrolysis coupled proton transport);GO:0016021(integral component of membrane);GO:0031966(mitochondrial membrane);GO:0045263(proton-transporting ATP synthase complex, coupling factor F(o));GO:0045263(proton-transporting ATP synthase complex, coup…	00190(Oxidative phosphorylation);05010(Alzheimer's disease);05012(Parkinson's disease);05016(Huntington's disease);05016(Huntington's disease)	K02128	NA	PREDICTED: Capra hircus ATP synthase, H+ transporting, mitochondrial Fo complex subunit C2 (subunit 9) (ATP5G2), transcript variant X1, mRNA;PREDICTED: Capra hircus ATP synthase, H+ transporting, mitochondrial Fo complex subunit C2 (subunit 9) (ATP5G2), transcript variant X2, mRNA	132.411	132.915	123.491	69.1906	113.117	114.225
MSTRG.9252	chrNC_030826.1	55617258	55622079	+	ATP5H	XM_005694151.3	GO:0000276(mitochondrial proton-transporting ATP synthase complex, coupling factor F(o));GO:0005753(mitochondrial proton-transporting ATP synthase complex);GO:0015078(hydrogen ion transmembrane transporter activity);GO:0015986(ATP synthesis coupled proton transport)	00190(Oxidative phosphorylation);05010(Alzheimer's disease);05012(Parkinson's disease);05016(Huntington's disease)	K02138	NA	PREDICTED: Capra hircus ATP synthase, H+ transporting, mitochondrial Fo complex subunit D (ATP5H), mRNA	112.931	111.974	110.848	103.286	131.449	114.098
MSTRG.5201	chrNC_030818.1	24994157	25009468	-	HAAO	MSTRG.5201.1;XM_013967594.2;XM_005686543.3;XM_013967592.2;MSTRG.5201.11;XM_013967593.2;MSTRG.5201.10;MSTRG.5201.5;MSTRG.5201.6;MSTRG.5201.7;MSTRG.5201.8;MSTRG.5201.9	GO:0000334(3-hydroxyanthranilate 3,4-dioxygenase activity);GO:0005737(cytoplasm);GO:0005829(cytosol);GO:0006569(tryptophan catabolic process);GO:0008198(ferrous iron binding);GO:0010043(response to zinc ion);GO:0019805(quinolinate biosynthetic process);GO:0034354('de novo' NAD biosynthetic process from tryptophan);GO:0043420(anthranilate metabolic process);GO:0046686(response to cadmium ion);GO:0…	00380(Tryptophan metabolism);00380(Tryptophan metabolism)	K00452	EC:1.13.11.6	PREDICTED: Capra hircus 3-hydroxyanthranilate 3,4-dioxygenase (HAAO), transcript variant X4, mRNA;PREDICTED: Capra hircus 3-hydroxyanthranilate 3,4-dioxygenase (HAAO), transcript variant X3, mRNA;PREDICTED: Capra hircus 3-hydroxyanthranilate 3,4-dioxygenase (HAAO), transcript variant X2, mRNA;PREDICTED: Capra hircus 3-hydroxyanthranilate 3,4-dioxygenase (HAAO), transcript variant X1, mRNA	130.16	118.2	120.35	98.2509	98.1314	113.018
MSTRG.10449	chrNC_030830.1	22440675	22458638	+	HSP70.1;LOC102178315;LOC102178582	NM_001285703.1;MSTRG.10449.5;MSTRG.10449.4;MSTRG.10449.7;MSTRG.10449.6;MSTRG.10449.3;MSTRG.10449.2;MSTRG.10449.1;XM_013974027.2;102178582	GO:0000151(ubiquitin ligase complex);GO:0000723(telomere maintenance);GO:0001664(G-protein coupled receptor binding);GO:0005515(protein binding);GO:0005524(ATP binding);GO:0005739(mitochondrion);GO:0005814(centriole);GO:0005829(cytosol);GO:0005925(focal adhesion);GO:0006281(DNA repair);GO:0016234(inclusion body);GO:0031072(heat shock protein binding);GO:0031397(negative regulation of protein ubiq…	03040(Spliceosome);04141(Protein processing in endoplasmic reticulum);04010(MAPK signaling pathway);04144(Endocytosis);04612(Antigen processing and presentation);04915(Estrogen signaling pathway);04213(Longevity regulating pathway - multiple species);05134(Legionellosis);05162(Measles);05164(Influenza A);05169(Epstein-Barr virus infection);05145(Toxoplasmosis);05145(Toxoplasmosis)	K03283	NA	Capra hircus heat shock protein 70.1 (HSP70.1), mRNA;PREDICTED: Capra hircus heat shock 70 kDa protein 1B (LOC102178315), mRNA	67.5406	90.2242	154.844	157.855	93.5632	112.805
MSTRG.3835	chrNC_030814.1	104013934	104017198	-	ISYNA1	MSTRG.3835.3;MSTRG.3835.1;MSTRG.3835.2;XM_018051437.1	GO:0004512(inositol-3-phosphate synthase activity);GO:0005737(cytoplasm);GO:0006021(inositol biosynthetic process);GO:0008654(phospholipid biosynthetic process)	00562(Inositol phosphate metabolism)	K01858	EC:5.5.1.4	PREDICTED: Capra hircus inositol-3-phosphate synthase 1 (ISYNA1), mRNA	105.691	101.933	107.795	120.038	125.101	112.112
MSTRG.9802	chrNC_030828.1	66200079	66205435	-	HSP90AA1	MSTRG.9802.1;MSTRG.9802.2;XM_018066239.1;MSTRG.9802.4	GO:0005634(nucleus);GO:0005737(cytoplasm);GO:0009408(response to heat);GO:0009409(response to cold);GO:0046677(response to antibiotic)	04141(Protein processing in endoplasmic reticulum);04151(PI3K-Akt signaling pathway);04621(NOD-like receptor signaling pathway);04612(Antigen processing and presentation);04915(Estrogen signaling pathway);04914(Progesterone-mediated oocyte maturation);05200(Pathways in cancer);05215(Prostate cancer)	K04079	NA	PREDICTED: Capra hircus heat shock protein 90 alpha family class A member 1 (HSP90AA1), mRNA	101.499	118.76	109.018	99.8744	129.53	111.736
MSTRG.2425	chrNC_030812.1	56891819	56895668	+	CD63	MSTRG.2425.1;XM_018048120.1;XM_018048119.1;XM_018048121.1	GO:0016021(integral component of membrane);GO:0016021(integral component of membrane)	04142(Lysosome);05205(Proteoglycans in cancer);05205(Proteoglycans in cancer)	K06497	NA	PREDICTED: Capra hircus CD63 molecule (CD63), transcript variant X2, mRNA;PREDICTED: Capra hircus CD63 molecule (CD63), transcript variant X1, mRNA;PREDICTED: Capra hircus CD63 molecule (CD63), transcript variant X3, mRNA	110.509	113.908	116.546	115.729	100.332	111.405
MSTRG.6413	chrNC_030821.1	34390312	34489552	-	EIF3H	XM_018058369.1	GO:0001731(formation of translation preinitiation complex);GO:0003743(translation initiation factor activity);GO:0005852(eukaryotic translation initiation factor 3 complex);GO:0006413(translational initiation);GO:0016020(membrane);GO:0016282(eukaryotic 43S preinitiation complex);GO:0033290(eukaryotic 48S preinitiation complex);GO:0044822(poly(A) RNA binding);GO:0070062(extracellular exosome);GO:0…	03013(RNA transport);05162(Measles)	K03247	NA	PREDICTED: Capra hircus eukaryotic translation initiation factor 3 subunit H (EIF3H), mRNA	114.28	119.319	106.696	95.3753	120.348	111.204
MSTRG.8418	chrNC_030825.1	63853025	63857165	+	UBE2S	XM_018063069.1	GO:0000209(protein polyubiquitination);GO:0004842(ubiquitin-protein transferase activity);GO:0005524(ATP binding);GO:0005634(nucleus);GO:0005680(anaphase-promoting complex);GO:0005737(cytoplasm);GO:0006511(ubiquitin-dependent protein catabolic process);GO:0010458(exit from mitosis);GO:0010994(free ubiquitin chain polymerization);GO:0031145(anaphase-promoting complex-dependent catabolic process);G…	04120(Ubiquitin mediated proteolysis)	K10583	EC:2.3.2.23	PREDICTED: Capra hircus ubiquitin conjugating enzyme E2 S (UBE2S), mRNA	89.5931	114.831	127.456	102.478	119.281	110.728
MSTRG.3716	chrNC_030814.1	96621432	96625883	+	NDUFB7	XM_018051174.1	GO:0005747(mitochondrial respiratory chain complex I);GO:0005758(mitochondrial intermembrane space);GO:0008137(NADH dehydrogenase (ubiquinone) activity);GO:0055114(oxidation-reduction process)	00190(Oxidative phosphorylation);05010(Alzheimer's disease);05012(Parkinson's disease);05016(Huntington's disease);04932(Non-alcoholic fatty liver disease (NAFLD))	K03963	NA	PREDICTED: Capra hircus NADH:ubiquinone oxidoreductase subunit B7 (NDUFB7), mRNA	112.518	97.1843	101.723	121.545	119.09	110.412
MSTRG.6133	chrNC_030820.1	60490422	60491573	+	ID1	XM_005688450.3	GO:0000122(negative regulation of transcription from RNA polymerase II promoter);GO:0001886(endothelial cell morphogenesis);GO:0003700(transcription factor activity, sequence-specific DNA binding);GO:0005654(nucleoplasm);GO:0005794(Golgi apparatus);GO:0006351(transcription, DNA-templated);GO:0007507(heart development);GO:0007623(circadian rhythm);GO:0030509(BMP signaling pathway);GO:0031648(prote…	04015(Rap1 signaling pathway);04350(TGF-beta signaling pathway);04390(Hippo signaling pathway);04550(Signaling pathways regulating pluripotency of stem cells)	K04680	NA	PREDICTED: Capra hircus inhibitor of DNA binding 1, HLH protein (ID1), mRNA	89.3959	115.472	144.969	158.847	42.4155	110.22
MSTRG.7759	chrNC_030825.1	4175025	4176347	-	LOC108637952	MSTRG.7759.1;XM_018061736.1	GO:0004867(serine-type endopeptidase inhibitor activity);GO:0005524(ATP binding);GO:0005634(nucleus);GO:0005737(cytoplasm);GO:0008289(lipid binding);GO:0010951(negative regulation of endopeptidase activity);GO:0019901(protein kinase binding);GO:0044822(poly(A) RNA binding);GO:0070062(extracellular exosome)	NA	NA	NA	PREDICTED: Capra hircus phosphatidylethanolamine-binding protein 1 (LOC108637952), mRNA	109.806	119.847	129.039	86.6628	105.319	110.135
MSTRG.8973	chrNC_030826.1	41549567	41552136	+	EIF1	XM_018065096.1	GO:0003743(translation initiation factor activity);GO:0005634(nucleus);GO:0005737(cytoplasm);GO:0006413(translational initiation);GO:0006446(regulation of translational initiation);GO:0044822(poly(A) RNA binding)	03013(RNA transport)	K03113	NA	PREDICTED: Capra hircus eukaryotic translation initiation factor 1 (EIF1), mRNA	115.614	117.098	113.61	84.0471	118.813	109.837
MSTRG.4528	chrNC_030817.1	14239465	14245318	-	SLIRP	XM_005686168.3	GO:0000166(nucleotide binding);GO:0003723(RNA binding);GO:0005634(nucleus);GO:0005739(mitochondrion);GO:0006351(transcription, DNA-templated);GO:0006355(regulation of transcription, DNA-templated)	03015(mRNA surveillance pathway)	K14411	NA	PREDICTED: Capra hircus SRA stem-loop interacting RNA binding protein (SLIRP), mRNA	89.9216	104.51	96.2751	113.195	144.731	109.727
MSTRG.10847	chrNC_030832.1	325874	334150	+	DECR2	MSTRG.10847.1;XM_018040919.1	GO:0008670(2,4-dienoyl-CoA reductase (NADPH) activity)	04146(Peroxisome)	K13237	EC:1.3.1.34	PREDICTED: Capra hircus 2,4-dienoyl-CoA reductase 2, peroxisomal (DECR2), mRNA	113.352	111.733	121.349	113.217	84.1266	108.755
MSTRG.12324	chrNC_030836.1	50413437	50441348	+	IGF2;MIR483	MSTRG.12324.1;MSTRG.12324.3;MSTRG.12324.2;MSTRG.12324.5;MSTRG.12324.6;MSTRG.12324.4;MSTRG.12324.7;MSTRG.12324.8;MSTRG.12324.9;MSTRG.12324.10;MSTRG.12324.11;MSTRG.12324.12;NM_001287042.1;NM_001287041.1;MSTRG.12324.15;MSTRG.12324.16;MSTRG.12324.17;MSTRG.12324.18;MSTRG.12324.19;MSTRG.12324.20;MSTRG.12324.21;MSTRG.12324.28;MSTRG.12324.29;MSTRG.12324.26;MSTRG.12324.27;MSTRG.12324.30;MSTRG.12324.22;MST…	GO:0005615(extracellular space);GO:0005615(extracellular space)	05205(Proteoglycans in cancer);05205(Proteoglycans in cancer)	K13769	NA	Capra hircus insulin like growth factor 2 (IGF2), transcript variant 3, mRNA;Capra hircus insulin like growth factor 2 (IGF2), transcript variant 2, mRNA;Capra hircus microRNA 483 (MIR483), microRNA	115.3	93.7261	167.542	65.4271	101.644	108.728
MSTRG.11255	chrNC_030832.1	36369683	36373330	+	FIS1	XM_005697811.3	GO:0000266(mitochondrial fission);GO:0000422(mitophagy);GO:0001836(release of cytochrome c from mitochondria);GO:0005102(receptor binding);GO:0005777(peroxisome);GO:0005779(integral component of peroxisomal membrane);GO:0005783(endoplasmic reticulum);GO:0005829(cytosol);GO:0006626(protein targeting to mitochondrion);GO:0007204(positive regulation of cytosolic calcium ion concentration);GO:0008053…	NA	NA	NA	PREDICTED: Capra hircus fission, mitochondrial 1 (FIS1), mRNA	109.975	115.63	128.65	91.7433	95.2448	108.249
MSTRG.6176	chrNC_030820.1	63264059	63279821	-	AHCY	MSTRG.6176.1;XM_018057737.1	GO:0004013(adenosylhomocysteinase activity);GO:0005829(cytosol);GO:0006730(one-carbon metabolic process);GO:0033353(S-adenosylmethionine cycle);GO:0042470(melanosome);GO:0070062(extracellular exosome)	00270(Cysteine and methionine metabolism)	K01251	EC:3.3.1.1	PREDICTED: Capra hircus adenosylhomocysteinase (AHCY), mRNA	97.3371	109.789	126.872	111.377	95.2658	108.128
MSTRG.4183	chrNC_030815.1	90929878	90954107	-	ALDOB	MSTRG.4183.1;MSTRG.4183.2;XM_013966241.2;XM_005684250.3	GO:0004332(fructose-bisphosphate aldolase activity);GO:0006000(fructose metabolic process);GO:0006096(glycolytic process);GO:0006116(NADH oxidation);GO:0008092(cytoskeletal protein binding);GO:0030388(fructose 1,6-bisphosphate metabolic process);GO:0032781(positive regulation of ATPase activity);GO:0034451(centriolar satellite);GO:0042802(identical protein binding);GO:0051117(ATPase binding);GO:0…	01200(Carbon metabolism);01230(Biosynthesis of amino acids);00010(Glycolysis / Gluconeogenesis);00030(Pentose phosphate pathway);00051(Fructose and mannose metabolism);00051(Fructose and mannose metabolism)	K01623	EC:4.1.2.13	PREDICTED: Capra hircus aldolase, fructose-bisphosphate B (ALDOB), transcript variant X2, mRNA;PREDICTED: Capra hircus aldolase, fructose-bisphosphate B (ALDOB), transcript variant X1, mRNA	123.065	80.2008	155.896	91.7426	88.7905	107.939
MSTRG.10298	chrNC_030830.1	15210943	15215342	+	PSMG4	XM_018038805.1	GO:0043248(proteasome assembly)	NA	NA	NA	PREDICTED: Capra hircus proteasome assembly chaperone 4 (PSMG4), mRNA	103.577	90.5407	94.2421	119.173	129.717	107.45
MSTRG.7492	chrNC_030824.1	8470981	8477328	+	PLA2G1B	XM_005691564.3	GO:0004623(phospholipase A2 activity);GO:0005509(calcium ion binding);GO:0005576(extracellular region);GO:0016042(lipid catabolic process)	00564(Glycerophospholipid metabolism);00565(Ether lipid metabolism);00590(Arachidonic acid metabolism);00591(Linoleic acid metabolism);00592(alpha-Linolenic acid metabolism);04014(Ras signaling pathway);04270(Vascular smooth muscle contraction);04972(Pancreatic secretion);04975(Fat digestion and absorption)	K01047	EC:3.1.1.4	PREDICTED: Capra hircus phospholipase A2 group IB (PLA2G1B), mRNA	83.183	121.98	157.497	76.9163	85.109	104.937
MSTRG.13024	chrNW_017209257.1	16974	17955	.		MSTRG.13024.1	NA	NA	NA	NA		72.9591	72.6533	58.9977	147.811	167.375	103.959
MSTRG.12232	chrNC_030836.1	45684293	45686013	+	POLR2L	XM_018042698.1	GO:0003677(DNA binding);GO:0003899(DNA-directed RNA polymerase activity);GO:0005634(nucleus);GO:0005665(DNA-directed RNA polymerase II, core complex);GO:0006351(transcription, DNA-templated);GO:0006366(transcription from RNA polymerase II promoter);GO:0008270(zinc ion binding)	00230(Purine metabolism);00240(Pyrimidine metabolism);03020(RNA polymerase);04623(Cytosolic DNA-sensing pathway);05016(Huntington's disease);05169(Epstein-Barr virus infection)	K03007	NA	PREDICTED: Capra hircus RNA polymerase II subunit L (POLR2L), mRNA	99.57	92.4632	100.128	106.901	120.419	103.896
MSTRG.11628	chrNC_030834.1	3595845	3596781	+	LOC102173161	XR_311166.3	GO:0000027(ribosomal large subunit assembly);GO:0002181(cytoplasmic translation);GO:0003735(structural constituent of ribosome);GO:0022625(cytosolic large ribosomal subunit)	03010(Ribosome)	K02934	NA	PREDICTED: Capra hircus 60S ribosomal protein L6 pseudogene (LOC102173161), misc_RNA	114.278	119.972	110.05	72.5207	102.448	103.854
MSTRG.11192	chrNC_030832.1	32995899	33018921	-	EIF4H	MSTRG.11192.1;XM_018040728.1	GO:0000166(nucleotide binding);GO:0001731(formation of translation preinitiation complex);GO:0002181(cytoplasmic translation);GO:0003743(translation initiation factor activity);GO:0005844(polysome);GO:0016020(membrane);GO:0016281(eukaryotic translation initiation factor 4F complex);GO:0019953(sexual reproduction);GO:0033592(RNA strand annealing activity);GO:0034057(RNA strand-exchange activity);G…	03013(RNA transport);04150(mTOR signaling pathway)	K03258	NA	PREDICTED: Capra hircus eukaryotic translation initiation factor 4H (EIF4H), mRNA	118.737	110.14	117.773	74.8106	97.5063	103.793
MSTRG.12838	chrNW_017189926.1	20560	21649	-	LOC108634738	MSTRG.12838.1	NA	NA	NA	NA		72.9256	77.9939	61.2571	145.108	161.6	103.777
MSTRG.10441	chrNC_030830.1	22379723	22383265	-	DDAH2	XM_018038621.1;MSTRG.10441.1;XM_018038620.1	GO:0000052(citrulline metabolic process);GO:0005739(mitochondrion);GO:0005813(centrosome);GO:0006527(arginine catabolic process);GO:0016403(dimethylargininase activity);GO:0045429(positive regulation of nitric oxide biosynthetic process);GO:0070062(extracellular exosome);GO:0070062(extracellular exosome)	NA	NA	NA	PREDICTED: Capra hircus dimethylarginine dimethylaminohydrolase 2 (DDAH2), transcript variant X2, mRNA;PREDICTED: Capra hircus dimethylarginine dimethylaminohydrolase 2 (DDAH2), transcript variant X1, mRNA	79.925	88.0567	103.381	118.441	128.577	103.676
MSTRG.2638	chrNC_030812.1	102580649	102602830	-	PTMS	MSTRG.2638.1;MSTRG.2638.2;XM_018048558.1	GO:0002376(immune system process);GO:0008150(biological_process)	NA	NA	NA	PREDICTED: Capra hircus parathymosin (PTMS), mRNA	167.792	153.723	136.474	28.053	32.2186	103.652
MSTRG.7421	chrNC_030824.1	2368966	2371138	-	LOC102187154	XM_005691619.3	GO:0005750(mitochondrial respiratory chain complex III);GO:0006122(mitochondrial electron transport, ubiquinol to cytochrome c);GO:0008121(ubiquinol-cytochrome-c reductase activity);GO:0009060(aerobic respiration);GO:0034551(mitochondrial respiratory chain complex III assembly);GO:0070062(extracellular exosome);GO:1902600(hydrogen ion transmembrane transport)	00190(Oxidative phosphorylation);04260(Cardiac muscle contraction);05010(Alzheimer's disease);05012(Parkinson's disease);05016(Huntington's disease);04932(Non-alcoholic fatty liver disease (NAFLD))	K00419	NA	PREDICTED: Capra hircus cytochrome b-c1 complex subunit 9 (LOC102187154), mRNA	94.2608	109.072	102.376	91.2176	119.648	103.315
MSTRG.12771	chrNW_017189797.1	23167	27486	-	LOC108634681	XM_018044756.1;MSTRG.12771.1	GO:0005576(extracellular region);GO:0006957(complement activation, alternative pathway)	04610(Complement and coagulation cascades);05150(Staphylococcus aureus infection)	K04004	NA	PREDICTED: Capra hircus complement factor H-like (LOC108634681), mRNA	173.119	111.549	82.0213	83.0709	65.293	103.011
MSTRG.3402	chrNC_030814.1	66797814	66799988	-	ATP5D	XM_005682906.3	GO:0000275(mitochondrial proton-transporting ATP synthase complex, catalytic core F(1));GO:0005740(mitochondrial envelope);GO:0005753(mitochondrial proton-transporting ATP synthase complex);GO:0015078(hydrogen ion transmembrane transporter activity);GO:0015986(ATP synthesis coupled proton transport);GO:0015992(proton transport);GO:0045259(proton-transporting ATP synthase complex);GO:0046933(proto…	00190(Oxidative phosphorylation);05010(Alzheimer's disease);05012(Parkinson's disease);05016(Huntington's disease)	K02134	NA	PREDICTED: Capra hircus ATP synthase, H+ transporting, mitochondrial F1 complex, delta subunit (ATP5D), mRNA	114.679	107.193	120.9	88.2381	82.3059	102.663
MSTRG.8284	chrNC_030825.1	56619039	56633500	+	SNRNP70	XM_018062758.1;MSTRG.8284.2;MSTRG.8284.3;MSTRG.8284.4;MSTRG.8284.5;MSTRG.8284.6;MSTRG.8284.7;MSTRG.8284.8;XM_018062757.1;MSTRG.8284.10	GO:0000166(nucleotide binding);GO:0000243(commitment complex);GO:0000398(mRNA splicing, via spliceosome);GO:0003729(mRNA binding);GO:0005654(nucleoplasm);GO:0005685(U1 snRNP);GO:0030619(U1 snRNA binding);GO:0048026(positive regulation of mRNA splicing, via spliceosome);GO:0071004(U2-type prespliceosome);GO:0071011(precatalytic spliceosome);GO:0003723(RNA binding);GO:0005681(spliceosomal complex);…	03040(Spliceosome);03040(Spliceosome)	K11093	NA	PREDICTED: Capra hircus small nuclear ribonucleoprotein U1 subunit 70 (SNRNP70), transcript variant X2, mRNA;PREDICTED: Capra hircus small nuclear ribonucleoprotein U1 subunit 70 (SNRNP70), transcript variant X1, mRNA	91.2667	102.576	100.526	109.723	105.671	101.953
MSTRG.2569	chrNC_030812.1	93666051	93737901	-	C5H12orf60;LOC108636046	MSTRG.2569.1;MSTRG.2569.2;MSTRG.2569.3;XM_018048447.1	GO:0000790(nuclear chromatin);GO:0003677(DNA binding);GO:0006342(chromatin silencing)	05322(Systemic lupus erythematosus);05034(Alcoholism)	K11251	NA	PREDICTED: Capra hircus histone H2A.J (LOC108636046), mRNA	136.166	115.916	122.317	110.398	24.3458	101.828
MSTRG.10522	chrNC_030830.1	31094597	31100346	-	HSP90AB1	MSTRG.10522.2;XM_005696358.2;MSTRG.10522.1	GO:0005634(nucleus);GO:0005737(cytoplasm);GO:0043627(response to estrogen)	04141(Protein processing in endoplasmic reticulum);04151(PI3K-Akt signaling pathway);04621(NOD-like receptor signaling pathway);04612(Antigen processing and presentation);04915(Estrogen signaling pathway);04914(Progesterone-mediated oocyte maturation);05200(Pathways in cancer);05215(Prostate cancer)	K04079	NA	PREDICTED: Capra hircus heat shock protein 90 alpha family class B member 1 (HSP90AB1), mRNA	93.1232	114.712	105.017	83	112.686	101.708
MSTRG.10890	chrNC_030832.1	1427552	1429957	+	NDUFB10	XM_018040705.1	GO:0005747(mitochondrial respiratory chain complex I);GO:0070062(extracellular exosome)	00190(Oxidative phosphorylation);05010(Alzheimer's disease);05012(Parkinson's disease);05016(Huntington's disease);04932(Non-alcoholic fatty liver disease (NAFLD))	K03966	NA	PREDICTED: Capra hircus NADH:ubiquinone oxidoreductase subunit B10 (NDUFB10), mRNA	107.885	100.035	111.768	82.9257	104.241	101.371
MSTRG.1625	chrNC_030810.1	105357832	105365078	-	SSR2	XM_005677365.3;XM_005677363.3	GO:0005783(endoplasmic reticulum);GO:0016021(integral component of membrane);GO:0005789(endoplasmic reticulum membrane);GO:0005789(endoplasmic reticulum membrane)	04141(Protein processing in endoplasmic reticulum);04141(Protein processing in endoplasmic reticulum)	K13250	NA	PREDICTED: Capra hircus signal sequence receptor subunit 2 (SSR2), transcript variant X2, mRNA;PREDICTED: Capra hircus signal sequence receptor subunit 2 (SSR2), transcript variant X1, mRNA	113.587	115.222	101.517	67.0356	108.34	101.14
MSTRG.1615	chrNC_030810.1	104685834	104688459	-	KRTCAP2	MSTRG.1615.1;XM_018046232.1	GO:0008250(oligosaccharyltransferase complex);GO:0016021(integral component of membrane)	NA	NA	NA	PREDICTED: Capra hircus keratinocyte associated protein 2 (KRTCAP2), mRNA	93.1124	94.1486	83.4502	109.636	123.518	100.773
MSTRG.12815	chrNW_017189851.1	761761	766096	-	DGCR6L	XM_018044861.1;XM_018044862.1	GO:0003674(molecular_function);GO:0005578(proteinaceous extracellular matrix);GO:0005634(nucleus);GO:0007155(cell adhesion);GO:0009887(organ morphogenesis);GO:0009887(organ morphogenesis)	04512(ECM-receptor interaction);04640(Hematopoietic cell lineage);04611(Platelet activation);04611(Platelet activation)	K06262	NA	PREDICTED: Capra hircus DiGeorge syndrome critical region gene 6-like (DGCR6L), transcript variant X1, mRNA;PREDICTED: Capra hircus DiGeorge syndrome critical region gene 6-like (DGCR6L), transcript variant X2, mRNA	102.721	85.2718	92.5578	114.625	108.007	100.637
MSTRG.6438	chrNC_030821.1	45488761	45493161	+	RPL7	MSTRG.6438.1;XM_005689063.3	GO:0000463(maturation of LSU-rRNA from tricistronic rRNA transcript (SSU-rRNA, 5.8S rRNA, LSU-rRNA));GO:0002181(cytoplasmic translation);GO:0003735(structural constituent of ribosome);GO:0022625(cytosolic large ribosomal subunit);GO:0044822(poly(A) RNA binding)	03010(Ribosome)	K02937	NA	PREDICTED: Capra hircus ribosomal protein L7 (RPL7), mRNA	105.589	100.721	103.926	89.62	102.035	100.378
MSTRG.7614	chrNC_030824.1	24605538	24606004	-	LOC106503036	XR_001919397.1	GO:0002181(cytoplasmic translation);GO:0003735(structural constituent of ribosome);GO:0022625(cytosolic large ribosomal subunit);GO:0042273(ribosomal large subunit biogenesis)	03010(Ribosome)	K02917	NA	PREDICTED: Capra hircus 60S ribosomal protein L35a pseudogene (LOC106503036), misc_RNA	105.651	114.205	106.971	82.5158	91.6736	100.203
MSTRG.7977	chrNC_030825.1	38083608	38084147	-	LOC102174238	XR_310693.3	GO:0003735(structural constituent of ribosome);GO:0005840(ribosome);GO:0006412(translation)	03010(Ribosome)	K02977	NA	PREDICTED: Capra hircus ubiquitin-40S ribosomal protein S27a pseudogene (LOC102174238), misc_RNA	104.009	118.461	114.212	55.3753	108.375	100.086
MSTRG.12872	chrNW_017190051.1	128444	136035	-	SNRPD3	XM_018045026.1;MSTRG.12872.1;XM_018045027.1	GO:0000243(commitment complex);GO:0000245(spliceosomal complex assembly);GO:0000387(spliceosomal snRNP assembly);GO:0003723(RNA binding);GO:0005654(nucleoplasm);GO:0005682(U5 snRNP);GO:0005683(U7 snRNP);GO:0005685(U1 snRNP);GO:0005686(U2 snRNP);GO:0005687(U4 snRNP);GO:0005689(U12-type spliceosomal complex);GO:0005697(telomerase holoenzyme complex);GO:0005829(cytosol);GO:0006479(protein methylatio…	03040(Spliceosome);05322(Systemic lupus erythematosus);05322(Systemic lupus erythematosus)	K11088	NA	PREDICTED: Capra hircus small nuclear ribonucleoprotein D3 polypeptide (SNRPD3), transcript variant X1, mRNA;PREDICTED: Capra hircus small nuclear ribonucleoprotein D3 polypeptide (SNRPD3), transcript variant X2, mRNA	105.836	102.589	114.573	78.5923	98.4552	100.009
MSTRG.9650	chrNC_030828.1	33446086	33509732	-	CLK3	MSTRG.9650.1;XM_018066134.1;XM_018066137.1;XM_018066136.1;XM_018066135.1	GO:0001669(acrosomal vesicle);GO:0004674(protein serine/threonine kinase activity);GO:0004712(protein serine/threonine/tyrosine kinase activity);GO:0004713(protein tyrosine kinase activity);GO:0005524(ATP binding);GO:0005634(nucleus);GO:0005654(nucleoplasm);GO:0016020(membrane);GO:0018108(peptidyl-tyrosine phosphorylation);GO:0043484(regulation of RNA splicing);GO:0044822(poly(A) RNA binding);GO:…	05134(Legionellosis);05134(Legionellosis)	K08823	EC:2.7.12.1	PREDICTED: Capra hircus CDC like kinase 3 (CLK3), transcript variant X1, mRNA;PREDICTED: Capra hircus CDC like kinase 3 (CLK3), transcript variant X4, mRNA;PREDICTED: Capra hircus CDC like kinase 3 (CLK3), transcript variant X3, mRNA;PREDICTED: Capra hircus CDC like kinase 3 (CLK3), transcript variant X2, mRNA	77.1326	90.2448	92.7077	124.391	114.776	99.8503
MSTRG.5400	chrNC_030818.1	73277614	73278175	+	LOC102190045	XR_001296292.2	GO:0000027(ribosomal large subunit assembly);GO:0000166(nucleotide binding);GO:0003735(structural constituent of ribosome);GO:0005730(nucleolus);GO:0006412(translation);GO:0008283(cell proliferation);GO:0022625(cytosolic large ribosomal subunit);GO:0044822(poly(A) RNA binding);GO:0070062(extracellular exosome)	03010(Ribosome)	K02893	NA	PREDICTED: Capra hircus 60S ribosomal protein L23a pseudogene (LOC102190045), misc_RNA	97.7049	91.5995	98.901	111.671	99.1849	99.8122
MSTRG.4080	chrNC_030815.1	68909916	68999810	+	XPO7	XM_018052255.1;XM_005683969.3;XM_013966097.2;MSTRG.4080.4;MSTRG.4080.5;MSTRG.4080.6;MSTRG.4080.7	GO:0005622(intracellular);GO:0006886(intracellular protein transport);GO:0008536(Ran GTPase binding);GO:0005049(nuclear export signal receptor activity);GO:0005643(nuclear pore);GO:0005737(cytoplasm);GO:0006611(protein export from nucleus);GO:0006611(protein export from nucleus)	NA	NA	NA	PREDICTED: Capra hircus exportin 7 (XPO7), transcript variant X3, mRNA;PREDICTED: Capra hircus exportin 7 (XPO7), transcript variant X2, mRNA;PREDICTED: Capra hircus exportin 7 (XPO7), transcript variant X1, mRNA	92.5861	107.482	114.179	84.8364	99.2594	99.6687
MSTRG.3273	chrNC_030814.1	48668848	48676702	+	CD74	MSTRG.3273.1;XM_018050158.1;XM_018050159.1	GO:0001516(prostaglandin biosynthetic process);GO:0001540(beta-amyloid binding);GO:0001961(positive regulation of cytokine-mediated signaling pathway);GO:0002606(positive regulation of dendritic cell antigen processing and presentation);GO:0002792(negative regulation of peptide secretion);GO:0002830(positive regulation of type 2 immune response);GO:0002906(negative regulation of mature B cell apo…	04612(Antigen processing and presentation);05152(Tuberculosis);05168(Herpes simplex infection);05168(Herpes simplex infection)	K06505	NA	PREDICTED: Capra hircus CD74 molecule (CD74), transcript variant X1, mRNA;PREDICTED: Capra hircus CD74 molecule (CD74), transcript variant X2, mRNA	183.757	100.366	105.881	21.5295	86.713	99.6493
MSTRG.2217	chrNC_030812.1	26386328	26461758	-	PFDN5	MSTRG.2217.1;XM_005679909.1	GO:0006457(protein folding);GO:0016272(prefoldin complex);GO:0045892(negative regulation of transcription, DNA-templated);GO:0051082(unfolded protein binding);GO:0060041(retina development in camera-type eye);GO:0090090(negative regulation of canonical Wnt signaling pathway)	03018(RNA degradation)	K03678	NA	PREDICTED: Capra hircus prefoldin subunit 5 (PFDN5), mRNA	94.8701	104.516	104.886	90.8209	103.106	99.6398
MSTRG.11652	chrNC_030834.1	8364573	8376630	-	VDAC3	XM_018041874.1;XM_018041875.1;XM_018041873.1;XM_018041876.1	GO:0005741(mitochondrial outer membrane);GO:0006820(anion transport);GO:0008308(voltage-gated anion channel activity);GO:0055085(transmembrane transport);GO:1902017(regulation of cilium assembly);GO:0000166(nucleotide binding);GO:0015288(porin activity);GO:0046930(pore complex);GO:0046930(pore complex)	04020(Calcium signaling pathway);04022(cGMP - PKG signaling pathway);05203(Viral carcinogenesis);05012(Parkinson's disease);05016(Huntington's disease);05166(HTLV-I infection);05161(Hepatitis B);05161(Hepatitis B)	K15041	NA	PREDICTED: Capra hircus voltage dependent anion channel 3 (VDAC3), transcript variant X2, mRNA;PREDICTED: Capra hircus voltage dependent anion channel 3 (VDAC3), transcript variant X3, mRNA;PREDICTED: Capra hircus voltage dependent anion channel 3 (VDAC3), transcript variant X1, mRNA;PREDICTED: Capra hircus voltage dependent anion channel 3 (VDAC3), transcript variant X4, mRNA	98.7429	104.317	117.725	86.3713	90.3393	99.4993
MSTRG.8610	chrNC_030826.1	18933353	19107103	-	LOC102189615	MSTRG.8610.1	NA	NA	NA	NA		78.0153	62.3507	121.3	76.8326	154.337	98.5672
MSTRG.8761	chrNC_030826.1	26707548	26710922	-	ASGR1	XM_005693480.2;MSTRG.8761.5;MSTRG.8761.4;MSTRG.8761.2;MSTRG.8761.3;XM_005693481.3	GO:0016021(integral component of membrane);GO:0016021(integral component of membrane)	04918(Thyroid hormone synthesis);04918(Thyroid hormone synthesis)	K10063	NA	PREDICTED: Capra hircus asialoglycoprotein receptor 1 (ASGR1), transcript variant X1, mRNA;PREDICTED: Capra hircus asialoglycoprotein receptor 1 (ASGR1), transcript variant X2, mRNA	102.235	104.293	114.397	102.169	66.8112	97.9811
MSTRG.8278	chrNC_030825.1	56502509	56518351	+	NUCB1	XM_018062749.1	GO:0003677(DNA binding);GO:0005509(calcium ion binding);GO:0005615(extracellular space);GO:0005793(endoplasmic reticulum-Golgi intermediate compartment);GO:0005794(Golgi apparatus);GO:0015630(microtubule cytoskeleton);GO:0016020(membrane);GO:0070062(extracellular exosome)	04142(Lysosome)	K12385	NA	PREDICTED: Capra hircus nucleobindin 1 (NUCB1), mRNA	141.749	98.1009	83.7891	72.9844	91.87	97.6987
MSTRG.694	chrNC_030809.1	15503748	15504257	+	LOC108637496	XR_001919101.1	GO:0003735(structural constituent of ribosome);GO:0006412(translation);GO:0016020(membrane);GO:0022627(cytosolic small ribosomal subunit);GO:0044822(poly(A) RNA binding);GO:0070062(extracellular exosome)	03010(Ribosome)	K02969	NA	PREDICTED: Capra hircus 40S ribosomal protein S20 pseudogene (LOC108637496), misc_RNA	104.785	105.734	101.029	69.9878	103.845	97.0761
MSTRG.3382	chrNC_030814.1	66022563	66023859	-	LOC102171149	XM_018050399.1	GO:0005743(mitochondrial inner membrane);GO:0008121(ubiquinol-cytochrome-c reductase activity);GO:0021539(subthalamus development);GO:0021548(pons development);GO:0021680(cerebellar Purkinje cell layer development);GO:0021766(hippocampus development);GO:0021794(thalamus development);GO:0021854(hypothalamus development);GO:0021860(pyramidal neuron development);GO:0030901(midbrain development);GO:0…	00190(Oxidative phosphorylation);04260(Cardiac muscle contraction);05010(Alzheimer's disease);05012(Parkinson's disease);05016(Huntington's disease);04932(Non-alcoholic fatty liver disease (NAFLD))	K00418	NA	PREDICTED: Capra hircus cytochrome b-c1 complex subunit 8 (LOC102171149), mRNA	92.7129	93.8435	98.0065	90.4996	106.877	96.388
MSTRG.1741	chrNC_030810.1	118934052	118934707	+	LOC102171393	102171393	NA	NA	NA	NA		100.508	105.203	106.587	75.5177	93.2499	96.2131
MSTRG.1614	chrNC_030810.1	104670431	104671044	-	DPM3	XM_018046229.1;XM_005677406.2;XM_005677407.2	GO:0004582(dolichyl-phosphate beta-D-mannosyltransferase activity);GO:0005789(endoplasmic reticulum membrane);GO:0006506(GPI anchor biosynthetic process);GO:0030176(integral component of endoplasmic reticulum membrane);GO:0031647(regulation of protein stability);GO:0033185(dolichol-phosphate-mannose synthase complex);GO:0035269(protein O-linked mannosylation);GO:0035269(protein O-linked mannosyla…	00510(N-Glycan biosynthesis);00510(N-Glycan biosynthesis)	K09659	NA	PREDICTED: Capra hircus dolichyl-phosphate mannosyltransferase subunit 3 (DPM3), transcript variant X3, mRNA;PREDICTED: Capra hircus dolichyl-phosphate mannosyltransferase subunit 3 (DPM3), transcript variant X1, mRNA;PREDICTED: Capra hircus dolichyl-phosphate mannosyltransferase subunit 3 (DPM3), transcript variant X2, mRNA	86.1386	86.0834	77.1013	112.695	118.979	96.1995
MSTRG.8464	chrNC_030825.1	65512054	65540357	-	LOC102172380;LOC108638100	MSTRG.8464.2;XM_018063496.1;MSTRG.8464.1;XM_018063253.1	NA	NA	NA	NA	PREDICTED: Capra hircus uncharacterized LOC102172380 (LOC102172380), mRNA;PREDICTED: Capra hircus collagen alpha-1(I) chain-like (LOC108638100), mRNA	96.4127	89.8808	92.6834	110.392	87.3596	95.3457
MSTRG.12453	chrNW_017189516.1	46220673	46223754	-	SAT1	XM_005700998.3;MSTRG.12453.2	GO:0001525(angiogenesis);GO:0004145(diamine N-acetyltransferase activity);GO:0042127(regulation of cell proliferation)	00330(Arginine and proline metabolism)	K00657	EC:2.3.1.57	PREDICTED: Capra hircus spermidine/spermine N1-acetyltransferase 1 (SAT1), mRNA	108.044	121.071	100.018	69.633	75.3235	94.8179
MSTRG.4900	chrNC_030817.1	79231157	79253686	-	DAD1	XM_005685282.3	GO:0001824(blastocyst development);GO:0004576(oligosaccharyl transferase activity);GO:0004579(dolichyl-diphosphooligosaccharide-protein glycotransferase activity);GO:0006486(protein glycosylation);GO:0006915(apoptotic process);GO:0008250(oligosaccharyltransferase complex);GO:0016021(integral component of membrane);GO:0043066(negative regulation of apoptotic process);GO:0070062(extracellular exoso…	00510(N-Glycan biosynthesis);04141(Protein processing in endoplasmic reticulum)	K12668	NA	PREDICTED: Capra hircus defender against cell death 1 (DAD1), mRNA	95.9354	96.5358	94.6088	80.6497	105.948	94.7355
MSTRG.5830	chrNC_030819.1	68510295	68535084	-	ITM2B	XM_018056750.1	GO:0001540(beta-amyloid binding);GO:0005615(extracellular space);GO:0005794(Golgi apparatus);GO:0005886(plasma membrane);GO:0007399(nervous system development);GO:0010008(endosome membrane);GO:0030660(Golgi-associated vesicle membrane);GO:0031301(integral component of organelle membrane);GO:0042985(negative regulation of amyloid precursor protein biosynthetic process);GO:0070062(extracellular exo…	NA	NA	NA	PREDICTED: Capra hircus integral membrane protein 2B (ITM2B), mRNA	110.675	107.199	96.4019	74.0612	85.2541	94.7183
MSTRG.9764	chrNC_030828.1	59734031	59744691	+	GLRX5	XM_018066452.1	GO:0005759(mitochondrial matrix);GO:0009055(electron carrier activity);GO:0015035(protein disulfide oxidoreductase activity);GO:0045454(cell redox homeostasis);GO:0055114(oxidation-reduction process)	NA	NA	NA	PREDICTED: Capra hircus glutaredoxin 5 (GLRX5), mRNA	101.389	93.7636	111.329	79.7574	87.1174	94.6714
MSTRG.4502	chrNC_030817.1	143203	148886	-	B2M	XM_018053818.1	GO:0001895(retina homeostasis);GO:0001916(positive regulation of T cell mediated cytotoxicity);GO:0001948(glycoprotein binding);GO:0002481(antigen processing and presentation of exogenous protein antigen via MHC class Ib, TAP-dependent);GO:0002726(positive regulation of T cell cytokine production);GO:0003254(regulation of membrane depolarization);GO:0005615(extracellular space);GO:0005794(Golgi a…	04612(Antigen processing and presentation)	K08055	NA	PREDICTED: Capra hircus beta-2-microglobulin (B2M), mRNA	322.57	36.1101	35.3797	37.6277	40.4912	94.4358
MSTRG.11440	chrNC_030833.1	12647736	12656856	+	PRDX3	XM_005698533.3	GO:0001893(maternal placenta development);GO:0005739(mitochondrion);GO:0005769(early endosome);GO:0007005(mitochondrion organization);GO:0008022(protein C-terminus binding);GO:0008284(positive regulation of cell proliferation);GO:0008379(thioredoxin peroxidase activity);GO:0008385(IkappaB kinase complex);GO:0018171(peptidyl-cysteine oxidation);GO:0019901(protein kinase binding);GO:0030099(myeloid…	04146(Peroxisome)	K13279	EC:1.11.1.15	PREDICTED: Capra hircus peroxiredoxin 3 (PRDX3), mRNA	96.2004	91.4159	96.7573	85.7646	101.969	94.4214
MSTRG.9843	chrNC_030828.1	68626506	68631075	+	SIVA1	XM_018065982.1;XM_018065984.1	GO:0005175(CD27 receptor binding);GO:0005654(nucleoplasm);GO:0005739(mitochondrion);GO:0006924(activation-induced cell death of T cells);GO:0008270(zinc ion binding);GO:0032088(negative regulation of NF-kappaB transcription factor activity);GO:0097191(extrinsic apoptotic signaling pathway);GO:0097193(intrinsic apoptotic signaling pathway);GO:1901030(positive regulation of mitochondrial outer memb…	NA	NA	NA	PREDICTED: Capra hircus SIVA1 apoptosis inducing factor (SIVA1), transcript variant X1, mRNA;PREDICTED: Capra hircus SIVA1 apoptosis inducing factor (SIVA1), transcript variant X2, mRNA	87.2273	95.3256	97.942	80.3797	108.171	93.8091
MSTRG.10092	chrNC_030829.1	50212955	50227828	-	SLC38A3	MSTRG.10092.6;MSTRG.10092.11;MSTRG.10092.1;MSTRG.10092.10;MSTRG.10092.2;MSTRG.10092.3;MSTRG.10092.4;MSTRG.10092.5;MSTRG.10092.7;MSTRG.10092.8;MSTRG.10092.9;XM_018067128.1	GO:0005290(L-histidine transmembrane transporter activity);GO:0005887(integral component of plasma membrane);GO:0006867(asparagine transport);GO:0006868(glutamine transport);GO:0015180(L-alanine transmembrane transporter activity);GO:0015182(L-asparagine transmembrane transporter activity);GO:0015186(L-glutamine transmembrane transporter activity);GO:0015808(L-alanine transport);GO:0015817(histid…	04964(Proximal tubule bicarbonate reclamation);04724(Glutamatergic synapse);04727(GABAergic synapse)	K13576	NA	PREDICTED: Capra hircus solute carrier family 38 member 3 (SLC38A3), mRNA	87.193	112.969	99.3205	80.1286	87.4596	93.4141
MSTRG.9037	chrNC_030826.1	43547105	43552048	+	G6PC3	XM_005693916.3;XM_018065207.1;MSTRG.9037.3;MSTRG.9037.4	GO:0004346(glucose-6-phosphatase activity);GO:0006094(gluconeogenesis);GO:0015760(glucose-6-phosphate transport);GO:0016311(dephosphorylation);GO:0030176(integral component of endoplasmic reticulum membrane);GO:0051156(glucose 6-phosphate metabolic process);GO:0051156(glucose 6-phosphate metabolic process)	00010(Glycolysis / Gluconeogenesis);00052(Galactose metabolism);00500(Starch and sucrose metabolism);04068(FoxO signaling pathway);04151(PI3K-Akt signaling pathway);04152(AMPK signaling pathway);04910(Insulin signaling pathway);04922(Glucagon signaling pathway);04920(Adipocytokine signaling pathway);04973(Carbohydrate digestion and absorption);04931(Insulin resistance);04931(Insulin resistance)	K01084	EC:3.1.3.9	PREDICTED: Capra hircus glucose-6-phosphatase catalytic subunit 3 (G6PC3), transcript variant X1, mRNA;PREDICTED: Capra hircus glucose-6-phosphatase catalytic subunit 3 (G6PC3), transcript variant X2, mRNA	75.6862	75.8539	95.8487	121.332	97.9647	93.337
MSTRG.12675	chrNW_017189579.1	37168	40719	+	EDF1	XM_018044501.1	GO:0003713(transcription coactivator activity);GO:0005516(calmodulin binding);GO:0005669(transcription factor TFIID complex);GO:0005730(nucleolus);GO:0005737(cytoplasm);GO:0006351(transcription, DNA-templated);GO:0006355(regulation of transcription, DNA-templated);GO:0007275(multicellular organism development);GO:0030154(cell differentiation);GO:0043388(positive regulation of DNA binding);GO:0043…	NA	NA	NA	PREDICTED: Capra hircus endothelial differentiation related factor 1 (EDF1), mRNA	89.1325	89.0248	101.717	86.2118	99.5239	93.1219
MSTRG.255	chrNC_030808.1	82653120	82662103	-	AP2M1	XM_005675196.3;MSTRG.255.7;MSTRG.255.4;MSTRG.255.2;MSTRG.255.3;MSTRG.255.5;MSTRG.255.6;XM_005675197.3;MSTRG.255.9;XM_013964104.2;XM_018047286.1	GO:0005048(signal sequence binding);GO:0005739(mitochondrion);GO:0005886(plasma membrane);GO:0005905(clathrin-coated pit);GO:0006886(intracellular protein transport);GO:0006897(endocytosis);GO:0008289(lipid binding);GO:0030131(clathrin adaptor complex);GO:0044325(ion channel binding);GO:0070062(extracellular exosome);GO:1903077(negative regulation of protein localization to plasma membrane);GO:00…	04144(Endocytosis);04961(Endocrine and other factor-regulated calcium reabsorption);04721(Synaptic vesicle cycle);05016(Huntington's disease);05016(Huntington's disease)	K11826	NA	PREDICTED: Capra hircus adaptor related protein complex 2 mu 1 subunit (AP2M1), transcript variant X3, mRNA;PREDICTED: Capra hircus adaptor related protein complex 2 mu 1 subunit (AP2M1), transcript variant X4, mRNA;PREDICTED: Capra hircus adaptor related protein complex 2 mu 1 subunit (AP2M1), transcript variant X2, mRNA;PREDICTED: Capra hircus adaptor related protein complex 2 mu 1 subunit (AP2…	111.254	107.826	111.56	81.4943	52.832	92.9932
MSTRG.4501	chrNC_030816.1	91508837	91530370	-	PSMB1	XM_005685017.3	GO:0004298(threonine-type endopeptidase activity);GO:0005634(nucleus);GO:0005737(cytoplasm);GO:0005839(proteasome core complex);GO:0051603(proteolysis involved in cellular protein catabolic process);GO:0070062(extracellular exosome)	03050(Proteasome)	K02732	EC:3.4.25.1	PREDICTED: Capra hircus proteasome subunit beta 1 (PSMB1), mRNA	113.063	111.169	113.627	55.2199	69.0707	92.4299
MSTRG.13002	chrNW_017202952.1	8351	11478	-	LOC108635079	XM_018045374.1;MSTRG.13002.2	NA	NA	NA	NA	PREDICTED: Capra hircus basic salivary proline-rich protein 1-like (LOC108635079), mRNA	66.302	62.7044	49.4703	136.167	146.162	92.1612
MSTRG.2818	chrNC_030812.1	118758895	118768821	+	NCAPH2	XM_018048985.1;XM_018048986.1;XM_018048987.1;XM_018048988.1;MSTRG.2818.10;MSTRG.2818.11;MSTRG.2818.5;MSTRG.2818.6;MSTRG.2818.7;MSTRG.2818.8;MSTRG.2818.9;XM_018048989.1;XM_018048990.1;MSTRG.2818.14	GO:0005634(nucleus);GO:0030261(chromosome condensation);GO:0030261(chromosome condensation)	04010(MAPK signaling pathway);04510(Focal adhesion);05132(Salmonella infection);05132(Salmonella infection)	K04437	NA	PREDICTED: Capra hircus non-SMC condensin II complex subunit H2 (NCAPH2), transcript variant X1, mRNA;PREDICTED: Capra hircus non-SMC condensin II complex subunit H2 (NCAPH2), transcript variant X2, mRNA;PREDICTED: Capra hircus non-SMC condensin II complex subunit H2 (NCAPH2), transcript variant X3, mRNA;PREDICTED: Capra hircus non-SMC condensin II complex subunit H2 (NCAPH2), transcript variant …	76.9695	74.9821	82.7286	128.871	96.7504	92.0603
MSTRG.8042	chrNC_030825.1	47345564	47370351	-	LOC106503109;PRODH2	MSTRG.8042.1;MSTRG.8042.11;MSTRG.8042.4;MSTRG.8042.5;MSTRG.8042.6;MSTRG.8042.7;MSTRG.8042.8;XM_018063310.1;XM_018063311.1;XM_018063312.1;MSTRG.8042.10;MSTRG.8042.2;MSTRG.8042.3;MSTRG.8042.9;XM_018063368.1	GO:0000776(kinetochore);GO:0000777(condensed chromosome kinetochore);GO:0004672(protein kinase activity);GO:0005524(ATP binding);GO:0005623(cell);GO:0005737(cytoplasm);GO:0006468(protein phosphorylation);GO:0007094(mitotic spindle assembly checkpoint);GO:0007140(male meiosis);GO:0008608(attachment of spindle microtubules to kinetochore);GO:0019901(protein kinase binding);GO:0030496(midbody);GO:00…	00330(Arginine and proline metabolism);00330(Arginine and proline metabolism)	K11394	EC:1.5.-.-	PREDICTED: Capra hircus inactive serine/threonine-protein kinase TEX14 (LOC106503109), transcript variant X1, mRNA;PREDICTED: Capra hircus inactive serine/threonine-protein kinase TEX14 (LOC106503109), transcript variant X2, mRNA;PREDICTED: Capra hircus inactive serine/threonine-protein kinase TEX14 (LOC106503109), transcript variant X3, mRNA;PREDICTED: Capra hircus proline dehydrogenase 2 (PRODH…	77.1463	91.6584	105.103	109.932	76.34	92.036
MSTRG.10376	chrNC_030830.1	22205945	22217016	-	DDX39B	XM_018039045.1;MSTRG.10376.4;MSTRG.10376.2;MSTRG.10376.3;MSTRG.10376.5;MSTRG.10376.10;MSTRG.10376.8;MSTRG.10376.9;MSTRG.10376.7;MSTRG.10376.6;MSTRG.10376.11	GO:0000245(spliceosomal complex assembly);GO:0000346(transcription export complex);GO:0000398(mRNA splicing, via spliceosome);GO:0004004(ATP-dependent RNA helicase activity);GO:0005524(ATP binding);GO:0005681(spliceosomal complex);GO:0005687(U4 snRNP);GO:0005688(U6 snRNP);GO:0005737(cytoplasm);GO:0006406(mRNA export from nucleus);GO:0006974(cellular response to DNA damage stimulus);GO:0010468(reg…	03040(Spliceosome);03013(RNA transport);03015(mRNA surveillance pathway);05164(Influenza A)	K12812	EC:3.6.4.13	PREDICTED: Capra hircus DEAD-box helicase 39B (DDX39B), mRNA	73.1407	91.1878	79.2268	118.053	98.5416	92.0299
MSTRG.6337	chrNC_030821.1	5152875	5170159	+	LOC102174762	XM_018058179.1	GO:0005737(cytoplasm);GO:0005886(plasma membrane);GO:0038166(angiotensin-activated signaling pathway);GO:0044070(regulation of anion transport);GO:0051453(regulation of intracellular pH);GO:2001150(positive regulation of dipeptide transmembrane transport)	00910(Nitrogen metabolism);04971(Gastric acid secretion);04972(Pancreatic secretion);04976(Bile secretion);04964(Proximal tubule bicarbonate reclamation);04966(Collecting duct acid secretion)	K18245	EC:4.2.1.1	PREDICTED: Capra hircus carbonic anhydrase 2 (LOC102174762), mRNA	129.313	110.956	116.199	52.4933	50.9369	91.9795
MSTRG.12779	chrNW_017189840.1	75803	104944	+	BCAP31	XM_018044779.1;XM_018044780.1	GO:0000139(Golgi membrane);GO:0005739(mitochondrion);GO:0005784(Sec61 translocon complex);GO:0005811(lipid particle);GO:0005887(integral component of plasma membrane);GO:0006886(intracellular protein transport);GO:0006888(ER to Golgi vesicle-mediated transport);GO:0007204(positive regulation of cytosolic calcium ion concentration);GO:0007283(spermatogenesis);GO:0032403(protein complex binding);GO…	04141(Protein processing in endoplasmic reticulum);04141(Protein processing in endoplasmic reticulum)	K14009	NA	PREDICTED: Capra hircus B-cell receptor-associated protein 31 (BCAP31), transcript variant X1, mRNA;PREDICTED: Capra hircus B-cell receptor-associated protein 31 (BCAP31), transcript variant X2, mRNA	98.7816	88.916	73.7587	93.5109	104.827	91.9589
MSTRG.8032	chrNC_030825.1	47030433	47032163	+	TMEM147	MSTRG.8032.1;MSTRG.8032.2;MSTRG.8032.3;NM_001314309.1	GO:0005789(endoplasmic reticulum membrane);GO:0016021(integral component of membrane);GO:0031648(protein destabilization)	NA	NA	NA	Capra hircus transmembrane protein 147 (TMEM147), mRNA	89.1494	88.7636	89.8065	91.3063	98.3633	91.4778
MSTRG.6731	chrNC_030822.1	29614181	29620958	+	UCP2	XM_018058858.1;MSTRG.6731.2;NM_001314147.1	GO:0001666(response to hypoxia);GO:0003735(structural constituent of ribosome);GO:0005743(mitochondrial inner membrane);GO:0006412(translation);GO:0006839(mitochondrial transport);GO:0016021(integral component of membrane);GO:0051881(regulation of mitochondrial membrane potential);GO:0051881(regulation of mitochondrial membrane potential)	03320(PPAR signaling pathway);05016(Huntington's disease);05016(Huntington's disease)	K08769	NA	PREDICTED: Capra hircus uncoupling protein 2 (UCP2), transcript variant X1, mRNA;Capra hircus uncoupling protein 2 (UCP2), mRNA	96.457	124.252	131.197	51.0514	53.434	91.2783
MSTRG.2937	chrNC_030813.1	45532206	45533458	-		MSTRG.2937.1	NA	NA	NA	NA		1.27708	90.8958	22.1536	161.646	177.313	90.6572
MSTRG.9045	chrNC_030826.1	43763699	43768342	-	SLC25A39	MSTRG.9045.2;XM_018065235.1;MSTRG.9045.1;XM_018065236.1;XM_018065234.1;XM_018065237.1	GO:0003735(structural constituent of ribosome);GO:0005743(mitochondrial inner membrane);GO:0006412(translation);GO:0006783(heme biosynthetic process);GO:0006810(transport);GO:0016021(integral component of membrane);GO:0016021(integral component of membrane)	NA	NA	NA	PREDICTED: Capra hircus solute carrier family 25 member 39 (SLC25A39), transcript variant X2, mRNA;PREDICTED: Capra hircus solute carrier family 25 member 39 (SLC25A39), transcript variant X3, mRNA;PREDICTED: Capra hircus solute carrier family 25 member 39 (SLC25A39), transcript variant X1, mRNA;PREDICTED: Capra hircus solute carrier family 25 member 39 (SLC25A39), transcript variant X4, mRNA	93.9842	93.4265	94.7766	63.847	103.405	89.8878
MSTRG.12281	chrNC_030836.1	46603414	46607673	+	NDUFS8	XM_018042921.1;MSTRG.12281.2;XM_018042920.1	GO:0005747(mitochondrial respiratory chain complex I);GO:0006979(response to oxidative stress);GO:0008137(NADH dehydrogenase (ubiquinone) activity);GO:0032981(mitochondrial respiratory chain complex I assembly);GO:0046872(metal ion binding);GO:0051539(4 iron, 4 sulfur cluster binding);GO:0055114(oxidation-reduction process);GO:0055114(oxidation-reduction process)	00190(Oxidative phosphorylation);05010(Alzheimer's disease);05012(Parkinson's disease);05016(Huntington's disease);04932(Non-alcoholic fatty liver disease (NAFLD));04932(Non-alcoholic fatty liver disease (NAFLD))	K03941	EC:1.6.5.3;EC:1.6.99.3	PREDICTED: Capra hircus NADH:ubiquinone oxidoreductase core subunit S8 (NDUFS8), transcript variant X2, mRNA;PREDICTED: Capra hircus NADH:ubiquinone oxidoreductase core subunit S8 (NDUFS8), transcript variant X1, mRNA	83.2185	70.9504	73.4636	112.757	108.169	89.7116
MSTRG.844	chrNC_030809.1	57063317	57110275	-	GYPC	XM_005676274.3;XM_005676275.3	GO:0016021(integral component of membrane);GO:0030863(cortical cytoskeleton);GO:0070492(oligosaccharide binding);GO:0070492(oligosaccharide binding)	05144(Malaria);05144(Malaria)	K06576	NA	PREDICTED: Capra hircus glycophorin C (Gerbich blood group) (GYPC), transcript variant X1, mRNA;PREDICTED: Capra hircus glycophorin C (Gerbich blood group) (GYPC), transcript variant X2, mRNA	85.7185	91.4218	103.083	76.9926	89.3071	89.3045
MSTRG.7709	chrNC_030824.1	68002012	68002606	+	FGA	MSTRG.7709.10;MSTRG.7709.11;MSTRG.7709.12;MSTRG.7709.3;MSTRG.7709.9;MSTRG.7709.13;MSTRG.7709.14;MSTRG.7709.4;MSTRG.7709.7;MSTRG.7709.8;MSTRG.7709.2;MSTRG.7709.1;MSTRG.7709.5;MSTRG.7709.6;MSTRG.7709.15;MSTRG.7709.16	NA	NA	NA	NA		121.792	104.906	109.89	39.6814	70.1909	89.2921
MSTRG.3210	chrNC_030814.1	24246430	24252894	-	LOC108633170	MSTRG.3210.1;MSTRG.3210.2;XM_005683410.3	GO:0004129(cytochrome-c oxidase activity);GO:0005743(mitochondrial inner membrane);GO:0016021(integral component of membrane);GO:0045277(respiratory chain complex IV);GO:1902600(hydrogen ion transmembrane transport)	00190(Oxidative phosphorylation);04260(Cardiac muscle contraction);05010(Alzheimer's disease);05012(Parkinson's disease);05016(Huntington's disease);04932(Non-alcoholic fatty liver disease (NAFLD))	K02272	NA	PREDICTED: Capra hircus cytochrome c oxidase subunit 7C, mitochondrial (LOC108633170), mRNA	72.7307	84.461	82.6302	101.982	102.877	88.9362
MSTRG.3859	chrNC_030814.1	104940939	104949199	+	NDUFA13	XM_005682081.3	GO:0005654(nucleoplasm);GO:0005737(cytoplasm);GO:0005739(mitochondrion);GO:0005746(mitochondrial respiratory chain);GO:0005747(mitochondrial respiratory chain complex I);GO:0008137(NADH dehydrogenase (ubiquinone) activity);GO:0016021(integral component of membrane);GO:0030308(negative regulation of cell growth);GO:0045892(negative regulation of transcription, DNA-templated);GO:0055114(oxidation-r…	00190(Oxidative phosphorylation);05010(Alzheimer's disease);05012(Parkinson's disease);05016(Huntington's disease);04932(Non-alcoholic fatty liver disease (NAFLD))	K11353	NA	PREDICTED: Capra hircus NADH:ubiquinone oxidoreductase subunit A13 (NDUFA13), mRNA	83.4999	83.4484	88.2067	91.7679	97.4418	88.873
MSTRG.8070	chrNC_030825.1	49279617	49292292	+	EIF3K	XM_005692376.3;MSTRG.8070.2;XM_005692375.3	GO:0001731(formation of translation preinitiation complex);GO:0003743(translation initiation factor activity);GO:0005634(nucleus);GO:0005852(eukaryotic translation initiation factor 3 complex);GO:0006413(translational initiation);GO:0006446(regulation of translational initiation);GO:0016020(membrane);GO:0016282(eukaryotic 43S preinitiation complex);GO:0033290(eukaryotic 48S preinitiation complex)…	NA	NA	NA	PREDICTED: Capra hircus eukaryotic translation initiation factor 3 subunit K (EIF3K), transcript variant X2, mRNA;PREDICTED: Capra hircus eukaryotic translation initiation factor 3 subunit K (EIF3K), transcript variant X1, mRNA	88.6606	89.199	96.7897	66.0421	102.386	88.6155
MSTRG.1179	chrNC_030810.1	20210224	20220796	-	PRDX1	XM_005678534.3	GO:0001895(retina homeostasis);GO:0005615(extracellular space);GO:0005634(nucleus);GO:0005739(mitochondrion);GO:0006979(response to oxidative stress);GO:0008283(cell proliferation);GO:0008379(thioredoxin peroxidase activity);GO:0019430(removal of superoxide radicals);GO:0032872(regulation of stress-activated MAPK cascade);GO:0034101(erythrocyte homeostasis);GO:0042267(natural killer cell mediated…	04146(Peroxisome)	K13279	EC:1.11.1.15	PREDICTED: Capra hircus peroxiredoxin 1 (PRDX1), mRNA	90.6705	86.5942	94.8996	81.6457	88.3584	88.4337
MSTRG.12174	chrNC_030836.1	43836059	43837077	-	LOC108634231	XM_018043265.1	GO:0000786(nucleosome);GO:0003677(DNA binding);GO:0005700(polytene chromosome);GO:0006333(chromatin assembly or disassembly);GO:0007140(male meiosis);GO:0007155(cell adhesion);GO:0008360(regulation of cell shape);GO:0046982(protein heterodimerization activity)	05202(Transcriptional misregulation in cancers);05322(Systemic lupus erythematosus);05034(Alcoholism)	K11253	NA	PREDICTED: Capra hircus histone H3.3-like (LOC108634231), mRNA	77.2854	97.9723	91.7663	79.4038	94.8012	88.2458
MSTRG.2105	chrNC_030811.1	106935062	106936361	+	LOC102184218	XR_001295571.2	GO:0000027(ribosomal large subunit assembly);GO:0003735(structural constituent of ribosome);GO:0005730(nucleolus);GO:0006412(translation);GO:0022625(cytosolic large ribosomal subunit)	03010(Ribosome)	K02925	NA	PREDICTED: Capra hircus 60S ribosomal protein L3 pseudogene (LOC102184218), misc_RNA	85.8269	93.0109	88.7554	77.5132	94.7606	87.9734
MSTRG.6387	chrNC_030821.1	17750940	17762058	-	LOC108637473	XM_018058082.1	GO:0004129(cytochrome-c oxidase activity);GO:0005743(mitochondrial inner membrane);GO:0016021(integral component of membrane);GO:0045277(respiratory chain complex IV);GO:1902600(hydrogen ion transmembrane transport)	00190(Oxidative phosphorylation);04260(Cardiac muscle contraction);05010(Alzheimer's disease);05012(Parkinson's disease);05016(Huntington's disease);04932(Non-alcoholic fatty liver disease (NAFLD))	K02268	NA	PREDICTED: Capra hircus uncharacterized LOC108637473 (LOC108637473), mRNA	83.4915	89.2993	87.1263	81.426	98.1859	87.9058
MSTRG.13003	chrNW_017202952.1	11815	13913	+	LOC108635081	XM_018045376.1	GO:0003674(molecular_function);GO:0005575(cellular_component);GO:0008150(biological_process)	NA	NA	NA	PREDICTED: Capra hircus translation initiation factor IF-2-like (LOC108635081), mRNA	80.1297	70.325	55.4121	108.883	122.842	87.5183
MSTRG.971	chrNC_030809.1	129717867	129742563	-	SLC40A1	XM_018065526.1;MSTRG.971.1;MSTRG.971.3;MSTRG.971.4;MSTRG.971.5	GO:0002260(lymphocyte homeostasis);GO:0003158(endothelium development);GO:0004872(receptor activity);GO:0005771(multivesicular body);GO:0006879(cellular iron ion homeostasis);GO:0008021(synaptic vesicle);GO:0015093(ferrous iron transmembrane transporter activity);GO:0016021(integral component of membrane);GO:0016323(basolateral plasma membrane);GO:0017046(peptide hormone binding);GO:0034395(regul…	04978(Mineral absorption)	K14685	NA	PREDICTED: Capra hircus solute carrier family 40 member 1 (SLC40A1), mRNA	66.8193	105.563	77.9448	87.0664	99.501	87.3788
MSTRG.11155	chrNC_030832.1	27137943	27148139	+	FUS	XM_018040751.1;XM_018040752.1;MSTRG.11155.3;MSTRG.11155.4;MSTRG.11155.5;MSTRG.11155.6;MSTRG.11155.7;MSTRG.11155.10;MSTRG.11155.8;MSTRG.11155.9;MSTRG.11155.11;MSTRG.11155.12;MSTRG.11155.13	GO:0000166(nucleotide binding);GO:0003676(nucleic acid binding);GO:0008270(zinc ion binding);GO:0008270(zinc ion binding)	05202(Transcriptional misregulation in cancers);05202(Transcriptional misregulation in cancers)	K13098	NA	PREDICTED: Capra hircus FUS RNA binding protein (FUS), transcript variant X1, mRNA;PREDICTED: Capra hircus FUS RNA binding protein (FUS), transcript variant X2, mRNA	78.6281	90.9515	88.5773	94.611	83.5731	87.2682
MSTRG.373	chrNC_030808.1	129094905	129120967	+	RBP1	XM_018049852.1	GO:0002138(retinoic acid biosynthetic process);GO:0005215(transporter activity);GO:0005829(cytosol);GO:0006776(vitamin A metabolic process);GO:0006810(transport);GO:0019841(retinol binding);GO:0030852(regulation of granulocyte differentiation);GO:0033189(response to vitamin A);GO:0042572(retinol metabolic process);GO:0044297(cell body)	00760(Nicotinate and nicotinamide metabolism)	K06210	EC:2.7.7.1;EC:2.7.7.18	PREDICTED: Capra hircus retinol binding protein 1 (RBP1), mRNA	77.5577	84.7268	93.2835	63.9964	116.353	87.1834
MSTRG.3656	chrNC_030814.1	94321232	94328666	+	UBL5	MSTRG.3656.1;MSTRG.3656.2;MSTRG.3656.3;MSTRG.3656.4;MSTRG.3656.5;XM_005682339.3;XM_005682340.1	GO:0000398(mRNA splicing, via spliceosome);GO:0005634(nucleus);GO:0005737(cytoplasm);GO:0006464(cellular protein modification process);GO:0031386(protein tag);GO:0031386(protein tag)	04212(Longevity regulating pathway - worm);04212(Longevity regulating pathway - worm)	K13113	NA	PREDICTED: Capra hircus ubiquitin like 5 (UBL5), transcript variant X1, mRNA;PREDICTED: Capra hircus ubiquitin like 5 (UBL5), transcript variant X2, mRNA	92.6079	71.8663	81.1544	90.086	98.7797	86.8989
MSTRG.8757	chrNC_030826.1	26609172	26610915	+	RNASEK	MSTRG.8757.1;XM_005693473.3	GO:0004521(endoribonuclease activity);GO:0005575(cellular_component);GO:0009303(rRNA transcription);GO:0016021(integral component of membrane);GO:0090502(RNA phosphodiester bond hydrolysis, endonucleolytic)	04514(Cell adhesion molecules (CAMs));04144(Endocytosis);04145(Phagosome);05168(Herpes simplex infection)	K06751	NA	PREDICTED: Capra hircus ribonuclease K (RNASEK), mRNA	99.649	95.0802	101.299	57.6896	80.1114	86.7658
MSTRG.6	chrNC_005044.2	4015	14976	-	ND2;COX1;ND6	MSTRG.6.1;MSTRG.6.2;MSTRG.6.3;MSTRG.6.4;MSTRG.6.5;MSTRG.6.6;MSTRG.6.7;MSTRG.6.8	NA	NA	NA	NA		9.12173	97.1624	21.0158	182.062	123.93	86.6585
MSTRG.442	chrNC_030808.1	143428261	143431756	-	LOC102186806	XM_005675654.3	GO:0004869(cysteine-type endopeptidase inhibitor activity);GO:0005737(cytoplasm);GO:0010951(negative regulation of endopeptidase activity)	NA	NA	NA	PREDICTED: Capra hircus cystatin-B (LOC102186806), mRNA	101.539	69.2626	88.3123	70.8114	102.681	86.5213
MSTRG.10732	chrNC_030831.1	34950014	34960684	-	SNRPD1	XM_018039587.1;XM_018039588.1	GO:0000243(commitment complex);GO:0000245(spliceosomal complex assembly);GO:0000387(spliceosomal snRNP assembly);GO:0003723(RNA binding);GO:0005682(U5 snRNP);GO:0005685(U1 snRNP);GO:0005686(U2 snRNP);GO:0005687(U4 snRNP);GO:0005689(U12-type spliceosomal complex);GO:0034715(pICln-Sm protein complex);GO:0034719(SMN-Sm protein complex);GO:0071010(prespliceosome);GO:0071011(precatalytic spliceosome);…	03040(Spliceosome);05322(Systemic lupus erythematosus);05322(Systemic lupus erythematosus)	K11087	NA	PREDICTED: Capra hircus small nuclear ribonucleoprotein D1 polypeptide (SNRPD1), transcript variant X1, mRNA;PREDICTED: Capra hircus small nuclear ribonucleoprotein D1 polypeptide (SNRPD1), transcript variant X2, mRNA	70.9894	81.383	80.5632	90.7512	107.718	86.281
MSTRG.8748	chrNC_030826.1	26382115	26388520	-	TM4SF5	XM_018064535.1	GO:0016021(integral component of membrane)	NA	NA	NA	PREDICTED: Capra hircus transmembrane 4 L six family member 5 (TM4SF5), mRNA	123.724	73.194	86.5973	100.192	47.6557	86.2726
MSTRG.2412	chrNC_030812.1	56580236	56581775	-	LOC102168701	MSTRG.2412.1;MSTRG.2412.2;XR_001295696.2	NA	NA	NA	NA	PREDICTED: Capra hircus uncharacterized LOC102168701 (LOC102168701), ncRNA	92.9172	98.4918	90.9223	71.1769	75.9004	85.8817
MSTRG.9	chrNC_005044.2	7176	16643	-	ND4;ND6;CYTB	MSTRG.9.1;MSTRG.9.2;MSTRG.9.3;MSTRG.9.4;MSTRG.9.5;MSTRG.9.6	NA	NA	NA	NA		43.7531	73.9984	53.6289	151.694	106.267	85.8683
MSTRG.1237	chrNC_030810.1	27079397	27086987	+	GPX7	XM_018044200.1	GO:0004096(catalase activity);GO:0004602(glutathione peroxidase activity);GO:0005576(extracellular region);GO:0005783(endoplasmic reticulum);GO:0006979(response to oxidative stress);GO:0055114(oxidation-reduction process)	00590(Arachidonic acid metabolism);00480(Glutathione metabolism);04918(Thyroid hormone synthesis)	K00432	EC:1.11.1.9	PREDICTED: Capra hircus glutathione peroxidase 7 (GPX7), mRNA	94.3422	92.1877	92.4872	70.7415	79.0896	85.7696
MSTRG.12710	chrNW_017189630.1	22947	142790	+	MAMLD1	MSTRG.12710.1;MSTRG.12710.2;MSTRG.12710.3;MSTRG.12710.4;MSTRG.12710.5;MSTRG.12710.6;MSTRG.12710.7;MSTRG.12710.8;MSTRG.12710.9;XM_018044593.1;XM_018044594.1;XM_018044592.1	GO:0006357(regulation of transcription from RNA polymerase II promoter);GO:0008584(male gonad development);GO:0008584(male gonad development)	04142(Lysosome);04978(Mineral absorption);04330(Notch signaling pathway);04330(Notch signaling pathway)	K06061;K12347	NA	PREDICTED: Capra hircus mastermind like domain containing 1 (MAMLD1), transcript variant X2, mRNA;PREDICTED: Capra hircus mastermind like domain containing 1 (MAMLD1), transcript variant X3, mRNA;PREDICTED: Capra hircus mastermind like domain containing 1 (MAMLD1), transcript variant X1, mRNA	106.971	108.144	101.759	53.5636	53.0375	84.695
MSTRG.13073	chrNW_017215238.1	6412	7787	+	LOC108635405	MSTRG.13073.1	NA	NA	NA	NA		22.384	49.9475	50.735	167.511	132.205	84.5565
MSTRG.5953	chrNC_030820.1	37433646	37481144	-	RRBP1	MSTRG.5953.8;MSTRG.5953.7;MSTRG.5953.1;MSTRG.5953.2;MSTRG.5953.3;MSTRG.5953.4;MSTRG.5953.5;MSTRG.5953.6;XM_018057225.1;XM_018057227.1;XM_018057228.1;XM_018057226.1	GO:0004872(receptor activity);GO:0005840(ribosome);GO:0006412(translation);GO:0030176(integral component of endoplasmic reticulum membrane);GO:0030176(integral component of endoplasmic reticulum membrane)	04141(Protein processing in endoplasmic reticulum);04141(Protein processing in endoplasmic reticulum)	K14000	NA	PREDICTED: Capra hircus ribosome binding protein 1 (RRBP1), transcript variant X1, mRNA;PREDICTED: Capra hircus ribosome binding protein 1 (RRBP1), transcript variant X3, mRNA;PREDICTED: Capra hircus ribosome binding protein 1 (RRBP1), transcript variant X4, mRNA;PREDICTED: Capra hircus ribosome binding protein 1 (RRBP1), transcript variant X2, mRNA	70.0746	80.2155	75.6764	101.202	95.078	84.4494
MSTRG.2193	chrNC_030812.1	25245764	25253820	+	PPP1R1A	XM_018047639.1;XM_018047640.1;MSTRG.2193.3	GO:0004865(protein serine/threonine phosphatase inhibitor activity);GO:0005615(extracellular space);GO:0005737(cytoplasm);GO:0005977(glycogen metabolic process);GO:0006469(negative regulation of protein kinase activity);GO:0035556(intracellular signal transduction);GO:0035556(intracellular signal transduction)	04261(Adrenergic signaling in cardiomyocytes);04720(Long-term potentiation);04720(Long-term potentiation)	K08050	NA	PREDICTED: Capra hircus protein phosphatase 1 regulatory inhibitor subunit 1A (PPP1R1A), transcript variant X1, mRNA;PREDICTED: Capra hircus protein phosphatase 1 regulatory inhibitor subunit 1A (PPP1R1A), transcript variant X2, mRNA	81.9661	77.3548	87.4804	86.2944	89.1335	84.4458
MSTRG.570	chrNC_030809.1	5789994	5797051	+	C1QB	XM_005676883.3;MSTRG.570.2	GO:0005581(collagen trimer);GO:0006958(complement activation, classical pathway);GO:0042803(protein homodimerization activity);GO:0045087(innate immune response);GO:0048839(inner ear development);GO:0070062(extracellular exosome);GO:0072562(blood microparticle)	04610(Complement and coagulation cascades);05322(Systemic lupus erythematosus);05020(Prion diseases);05133(Pertussis);05150(Staphylococcus aureus infection);05142(Chagas disease (American trypanosomiasis))	K03987	NA	PREDICTED: Capra hircus complement C1q B chain (C1QB), mRNA	216.611	51.7301	64.0827	47.2511	41.0304	84.1411
MSTRG.4265	chrNC_030816.1	4444365	4445130	+	LOC102171608	XR_001296046.2	GO:0000151(ubiquitin ligase complex);GO:0000974(Prp19 complex);GO:0001664(G-protein coupled receptor binding);GO:0001786(phosphatidylserine binding);GO:0005515(protein binding);GO:0005524(ATP binding);GO:0005634(nucleus);GO:0005681(spliceosomal complex);GO:0005730(nucleolus);GO:0005770(late endosome);GO:0005829(cytosol);GO:0005886(plasma membrane);GO:0005925(focal adhesion);GO:0006351(transcripti…	03040(Spliceosome);04141(Protein processing in endoplasmic reticulum);04010(MAPK signaling pathway);04144(Endocytosis);04612(Antigen processing and presentation);04915(Estrogen signaling pathway);04213(Longevity regulating pathway - multiple species);05134(Legionellosis);05162(Measles);05164(Influenza A);05169(Epstein-Barr virus infection);05145(Toxoplasmosis)	K03283	NA	PREDICTED: Capra hircus heat shock cognate 71 kDa protein pseudogene (LOC102171608), misc_RNA	66.2099	93.438	82.7777	95.2851	82.4109	84.0243
MSTRG.3766	chrNC_030814.1	98194120	98207527	+	WDR83OS	MSTRG.3766.1;XM_005682290.3	GO:0016021(integral component of membrane)	NA	NA	NA	PREDICTED: Capra hircus WD repeat domain 83 opposite strand (WDR83OS), mRNA	89.2852	85.7142	82.5446	81.7914	79.3954	83.7462
MSTRG.6527	chrNC_030821.1	80920572	80932331	-	EEF1D	XM_018058065.1;MSTRG.6527.1;NM_001314225.1	GO:0003677(DNA binding);GO:0003746(translation elongation factor activity);GO:0004871(signal transducer activity);GO:0005730(nucleolus);GO:0005783(endoplasmic reticulum);GO:0005853(eukaryotic translation elongation factor 1 complex);GO:0006414(translational elongation);GO:0007165(signal transduction);GO:0009299(mRNA transcription);GO:0010941(regulation of cell death);GO:0031072(heat shock protein…	05168(Herpes simplex infection);05168(Herpes simplex infection)	K15410	NA	PREDICTED: Capra hircus eukaryotic translation elongation factor 1 delta (EEF1D), transcript variant X1, mRNA;Capra hircus eukaryotic translation elongation factor 1 delta (EEF1D), mRNA	75.2871	74.45	77.4528	85.4876	105.757	83.6868
MSTRG.7483	chrNC_030824.1	8277027	8311809	-	RNF10	MSTRG.7483.1;XM_018061127.1	GO:0004842(ubiquitin-protein transferase activity);GO:0005634(nucleus);GO:0005737(cytoplasm);GO:0008270(zinc ion binding);GO:0045893(positive regulation of transcription, DNA-templated);GO:0051865(protein autoubiquitination)	04146(Peroxisome)	K13346	NA	PREDICTED: Capra hircus ring finger protein 10 (RNF10), mRNA	95.0219	86.0155	96.8915	60.7017	79.2523	83.5766
MSTRG.219	chrNC_030808.1	80100418	80201003	-	KNG1	MSTRG.219.1;MSTRG.219.2;MSTRG.219.3;XM_005675157.3;MSTRG.219.5;XM_005675156.3	GO:0004869(cysteine-type endopeptidase inhibitor activity);GO:0010951(negative regulation of endopeptidase activity);GO:0010951(negative regulation of endopeptidase activity)	04610(Complement and coagulation cascades);04610(Complement and coagulation cascades)	K03898	NA	PREDICTED: Capra hircus kininogen 1 (KNG1), transcript variant X2, mRNA;PREDICTED: Capra hircus kininogen 1 (KNG1), transcript variant X1, mRNA	78.2754	94.4659	90.2092	77.8945	75.4512	83.2592
MSTRG.8759	chrNC_030826.1	26659254	26681787	-	ASGR2	MSTRG.8759.2;MSTRG.8759.1;MSTRG.8759.3;MSTRG.8759.4;MSTRG.8759.5;MSTRG.8759.6;MSTRG.8759.7;XM_005693478.3;XM_018064543.1;XM_005693479.2	GO:0009100(glycoprotein metabolic process);GO:0016021(integral component of membrane);GO:0031647(regulation of protein stability);GO:0055088(lipid homeostasis);GO:0055088(lipid homeostasis)	04918(Thyroid hormone synthesis);04918(Thyroid hormone synthesis)	K10064	NA	PREDICTED: Capra hircus asialoglycoprotein receptor 2 (ASGR2), transcript variant X1, mRNA;PREDICTED: Capra hircus asialoglycoprotein receptor 2 (ASGR2), transcript variant X3, mRNA;PREDICTED: Capra hircus asialoglycoprotein receptor 2 (ASGR2), transcript variant X2, mRNA	78.4686	112.559	82.9251	81.1701	55.7581	82.1762
MSTRG.4205	chrNC_030815.1	99557654	99569691	-	TXN	XM_005684290.3;MSTRG.4205.2	GO:0009314(response to radiation);GO:0033158(regulation of protein import into nucleus, translocation);GO:0043388(positive regulation of DNA binding);GO:0055114(oxidation-reduction process)	04141(Protein processing in endoplasmic reticulum)	K01456	EC:3.5.1.52	PREDICTED: Capra hircus thioredoxin (TXN), mRNA	80.1492	62.7312	71.5553	90.7532	105.301	82.0979
MSTRG.3612	chrNC_030814.1	92506493	92512508	-	TUBB4A	MSTRG.3612.1;XM_018050940.1	GO:0003924(GTPase activity);GO:0005200(structural constituent of cytoskeleton);GO:0005525(GTP binding);GO:0005634(nucleus);GO:0005737(cytoplasm);GO:0005874(microtubule);GO:0005929(cilium);GO:0007017(microtubule-based process);GO:0033269(internode region of axon);GO:0043025(neuronal cell body);GO:0043209(myelin sheath);GO:0070062(extracellular exosome)	04145(Phagosome);04540(Gap junction);05130(Pathogenic Escherichia coli infection)	K07375	NA	PREDICTED: Capra hircus tubulin beta 4A class IVa (TUBB4A), mRNA	88.4522	88.4807	89.998	66.4367	72.0043	81.0744
MSTRG.8216	chrNC_030825.1	54307236	54310114	-	SNRPD2	XM_005692647.2	GO:0000387(spliceosomal snRNP assembly);GO:0005682(U5 snRNP);GO:0005685(U1 snRNP);GO:0005686(U2 snRNP);GO:0005687(U4 snRNP);GO:0005829(cytosol);GO:0034709(methylosome);GO:0034715(pICln-Sm protein complex);GO:0034719(SMN-Sm protein complex);GO:0046540(U4/U6 x U5 tri-snRNP complex);GO:0071011(precatalytic spliceosome);GO:0071013(catalytic step 2 spliceosome)	03040(Spliceosome)	K11096	NA	PREDICTED: Capra hircus small nuclear ribonucleoprotein D2 polypeptide (SNRPD2), mRNA	70.222	73.6486	70.94	94.2372	96.2894	81.0674
MSTRG.13066	chrNW_017215042.1	1707	3378	+		MSTRG.13066.1	NA	NA	NA	NA		82.374	57.5213	60.2246	97.9599	107.187	81.0533
MSTRG.9227	chrNC_030826.1	55044362	55047811	+	LOC102190909	XM_018063796.1	GO:0000786(nucleosome);GO:0003677(DNA binding);GO:0005700(polytene chromosome);GO:0006333(chromatin assembly or disassembly);GO:0007140(male meiosis);GO:0007155(cell adhesion);GO:0008360(regulation of cell shape);GO:0046982(protein heterodimerization activity)	05202(Transcriptional misregulation in cancers);05322(Systemic lupus erythematosus);05034(Alcoholism)	K11253	NA	PREDICTED: Capra hircus histone H3.3 (LOC102190909), mRNA	86.922	91.534	90.855	61.5839	74.1824	81.0155
MSTRG.2613	chrNC_030812.1	100471098	100542189	-	LOC102175560	MSTRG.2613.4;MSTRG.2613.3;MSTRG.2613.1;MSTRG.2613.2;XM_005680884.3;XM_018048527.1	GO:0001869(negative regulation of complement activation, lectin pathway);GO:0002020(protease binding);GO:0004867(serine-type endopeptidase inhibitor activity);GO:0005102(receptor binding);GO:0010951(negative regulation of endopeptidase activity);GO:0019959(interleukin-8 binding);GO:0019966(interleukin-1 binding);GO:0043120(tumor necrosis factor binding);GO:0048306(calcium-dependent protein bindin…	04610(Complement and coagulation cascades);04610(Complement and coagulation cascades)	K03910	NA	PREDICTED: Capra hircus alpha-2-macroglobulin (LOC102175560), transcript variant X1, mRNA;PREDICTED: Capra hircus alpha-2-macroglobulin (LOC102175560), transcript variant X2, mRNA	107.443	92.6848	97.4854	52.9154	54.3914	80.984
MSTRG.11346	chrNC_030832.1	39142386	39162223	+	RAC1	XM_018040436.1;XM_018040435.1	GO:0001934(positive regulation of protein phosphorylation);GO:0005515(protein binding);GO:0005525(GTP binding);GO:0005829(cytosol);GO:0005886(plasma membrane);GO:0007264(small GTPase mediated signal transduction);GO:0016020(membrane);GO:0030334(regulation of cell migration);GO:0042470(melanosome);GO:0048870(cell motility);GO:0051022(Rho GDP-dissociation inhibitor binding);GO:0071526(semaphorin-pl…	04014(Ras signaling pathway);04015(Rap1 signaling pathway);04010(MAPK signaling pathway);04310(Wnt signaling pathway);04370(VEGF signaling pathway);04071(Sphingolipid signaling pathway);04024(cAMP signaling pathway);04151(PI3K-Akt signaling pathway);04145(Phagosome);04810(Regulation of actin cytoskeleton);04510(Focal adhesion);04520(Adherens junction);04620(Toll-like receptor signaling pathway);0…	K04392	NA	PREDICTED: Capra hircus ras-related C3 botulinum toxin substrate 1 (rho family, small GTP binding protein Rac1) (RAC1), transcript variant X2, mRNA;PREDICTED: Capra hircus ras-related C3 botulinum toxin substrate 1 (rho family, small GTP binding protein Rac1) (RAC1), transcript variant X1, mRNA	85.1997	85.1554	85.92	61.947	86.2023	80.8849
MSTRG.11332	chrNC_030832.1	38607621	38614540	-	BRI3	MSTRG.11332.1;XM_018040636.1;MSTRG.11332.2	GO:0016021(integral component of membrane)	NA	NA	NA	PREDICTED: Capra hircus brain protein I3 (BRI3), mRNA	90.2393	84.2249	84.7163	68.7225	76.0967	80.7999
MSTRG.6552	chrNC_030821.1	81372718	81386296	+	ADCK5	XM_018058741.1;XR_001919177.1;XM_018058738.1;XM_018058739.1;XM_018058740.1;MSTRG.6552.6;MSTRG.6552.10;MSTRG.6552.11;MSTRG.6552.7;MSTRG.6552.8;MSTRG.6552.9;XM_018058742.1	GO:0004674(protein serine/threonine kinase activity);GO:0005515(protein binding);GO:0006468(protein phosphorylation);GO:0016021(integral component of membrane);GO:0016021(integral component of membrane)	NA	NA	NA	PREDICTED: Capra hircus aarF domain containing kinase 5 (ADCK5), transcript variant X4, mRNA;PREDICTED: Capra hircus aarF domain containing kinase 5 (ADCK5), transcript variant X6, misc_RNA;PREDICTED: Capra hircus aarF domain containing kinase 5 (ADCK5), transcript variant X1, mRNA;PREDICTED: Capra hircus aarF domain containing kinase 5 (ADCK5), transcript variant X2, mRNA;PREDICTED: Capra hircus…	62.369	62.3867	64.9575	123.965	88.6803	80.4718
MSTRG.4207	chrNC_030815.1	100704391	100734181	-	PTGR1	XM_005684303.3;MSTRG.4207.1;MSTRG.4207.3	GO:0005737(cytoplasm);GO:0008270(zinc ion binding);GO:0032440(2-alkenal reductase [NAD(P)] activity);GO:0047522(15-oxoprostaglandin 13-oxidase activity);GO:0055114(oxidation-reduction process);GO:0070062(extracellular exosome)	NA	NA	NA	PREDICTED: Capra hircus prostaglandin reductase 1 (PTGR1), mRNA	80.8099	83.9025	95.7941	76.0691	64.9998	80.3151
MSTRG.12941	chrNW_017191089.1	3260	4690	+		MSTRG.12941.1;MSTRG.12941.2	NA	NA	NA	NA		59.4564	56.5858	54.7434	109.846	120.452	80.2167
MSTRG.7150	chrNC_030823.1	41651621	41666295	-	PGD	XM_013970231.2;MSTRG.7150.3;MSTRG.7150.5;MSTRG.7150.2;MSTRG.7150.4	GO:0004616(phosphogluconate dehydrogenase (decarboxylating) activity);GO:0006098(pentose-phosphate shunt)	01200(Carbon metabolism);00030(Pentose phosphate pathway);00480(Glutathione metabolism)	K00033	EC:1.1.1.44;EC:1.1.1.343	PREDICTED: Capra hircus phosphogluconate dehydrogenase (PGD), mRNA	73.9051	71.5853	80.2326	74.3401	98.8886	79.7903
MSTRG.12754	chrNW_017189737.1	24588	32098	-		MSTRG.12754.1	NA	NA	NA	NA		60.3494	58.7562	49.3196	107.855	121.405	79.5369
MSTRG.8869	chrNC_030826.1	34427348	34463596	+	PEMT	XM_018064798.1;XM_018064799.1;XM_018064791.1;MSTRG.8869.4;XM_018064792.1;XM_018064796.1;MSTRG.8869.7;MSTRG.8869.8;XM_018064793.1;XM_018064794.1;XM_018064795.1;XM_018064797.1	GO:0000773(phosphatidyl-N-methylethanolamine N-methyltransferase activity);GO:0004608(phosphatidylethanolamine N-methyltransferase activity);GO:0005789(endoplasmic reticulum membrane);GO:0006656(phosphatidylcholine biosynthetic process);GO:0016021(integral component of membrane);GO:0031966(mitochondrial membrane);GO:0032259(methylation);GO:0080101(phosphatidyl-N-dimethylethanolamine N-methyltrans…	00564(Glycerophospholipid metabolism);00564(Glycerophospholipid metabolism)	K00551	EC:2.1.1.17	PREDICTED: Capra hircus phosphatidylethanolamine N-methyltransferase (PEMT), transcript variant X8, mRNA;PREDICTED: Capra hircus phosphatidylethanolamine N-methyltransferase (PEMT), transcript variant X9, mRNA;PREDICTED: Capra hircus phosphatidylethanolamine N-methyltransferase (PEMT), transcript variant X1, mRNA;PREDICTED: Capra hircus phosphatidylethanolamine N-methyltransferase (PEMT), transcr…	78.8675	74.6516	90.002	68.0233	85.1822	79.3453
MSTRG.10099	chrNC_030829.1	50559094	50586854	-	RNF123	XM_018066653.1;XM_018066650.1;XM_018066655.1;XM_018066652.1;XM_018066651.1;XM_018066654.1;MSTRG.10099.7;MSTRG.10099.8;MSTRG.10099.10;MSTRG.10099.9;MSTRG.10099.11	GO:0005737(cytoplasm);GO:0008270(zinc ion binding);GO:0008270(zinc ion binding)	04020(Calcium signaling pathway);04024(cAMP signaling pathway);04911(Insulin secretion);04921(Oxytocin signaling pathway);04260(Cardiac muscle contraction);04261(Adrenergic signaling in cardiomyocytes);04972(Pancreatic secretion);04713(Circadian entrainment);05410(Hypertrophic cardiomyopathy (HCM));05412(Arrhythmogenic right ventricular cardiomyopathy (ARVC));05414(Dilated cardiomyopathy (DCM));0…	K04962	NA	PREDICTED: Capra hircus ring finger protein 123 (RNF123), transcript variant X4, mRNA;PREDICTED: Capra hircus ring finger protein 123 (RNF123), transcript variant X1, mRNA;PREDICTED: Capra hircus ring finger protein 123 (RNF123), transcript variant X6, mRNA;PREDICTED: Capra hircus ring finger protein 123 (RNF123), transcript variant X3, mRNA;PREDICTED: Capra hircus ring finger protein 123 (RNF123…	72.8614	69.0413	79.5835	106.3	67.822	79.1215
MSTRG.11095	chrNC_030832.1	26032587	26040605	-	LOC102183750;SLX1A	XM_005697657.3;XM_018040158.1;XM_018040159.1;XM_018040161.1;XM_018040162.1;XM_018040163.1;MSTRG.11095.1;MSTRG.11095.2;MSTRG.11095.3;MSTRG.11095.4;XM_018040166.1	GO:0004062(aryl sulfotransferase activity);GO:0005737(cytoplasm);GO:0006584(catecholamine metabolic process);GO:0008202(steroid metabolic process);GO:0006281(DNA repair);GO:0006310(DNA recombination);GO:0008821(crossover junction endodeoxyribonuclease activity);GO:0017108(5'-flap endonuclease activity);GO:0033557(Slx1-Slx4 complex);GO:0046872(metal ion binding);GO:0090305(nucleic acid phosphodies…	05204(Chemical carcinogenesis);03460(Fanconi anemia pathway)	K01014;K15078	EC:2.8.2.1;EC:3.6.1.-	PREDICTED: Capra hircus sulfotransferase 1A1 (LOC102183750), transcript variant X1, mRNA;PREDICTED: Capra hircus sulfotransferase 1A1 (LOC102183750), transcript variant X2, mRNA;PREDICTED: Capra hircus sulfotransferase 1A1 (LOC102183750), transcript variant X3, mRNA;PREDICTED: Capra hircus sulfotransferase 1A1 (LOC102183750), transcript variant X4, mRNA;PREDICTED: Capra hircus sulfotransferase 1A…	85.8266	77.1088	83.0387	83.2717	65.4911	78.9474
MSTRG.569	chrNC_030809.1	5777650	5782031	+	C1QC	MSTRG.569.1;XM_018055450.1;XM_013974500.2	GO:0005581(collagen trimer);GO:0030853(negative regulation of granulocyte differentiation);GO:0045650(negative regulation of macrophage differentiation);GO:0070062(extracellular exosome);GO:0072562(blood microparticle);GO:0072562(blood microparticle)	04610(Complement and coagulation cascades);05322(Systemic lupus erythematosus);05020(Prion diseases);05133(Pertussis);05150(Staphylococcus aureus infection);05142(Chagas disease (American trypanosomiasis));05142(Chagas disease (American trypanosomiasis))	K03988	NA	PREDICTED: Capra hircus complement C1q C chain (C1QC), transcript variant X2, mRNA;PREDICTED: Capra hircus complement C1q C chain (C1QC), transcript variant X1, mRNA	193.092	50.0433	60.0118	47.2284	41.6353	78.4023
MSTRG.3349	chrNC_030814.1	61231541	61290498	+		MSTRG.3349.3;MSTRG.3349.2;MSTRG.3349.1;MSTRG.3349.4;MSTRG.3349.5;MSTRG.3349.6	NA	NA	NA	NA		2.49335	185.853	105.517	65.2876	31.4755	78.1253
MSTRG.2284	chrNC_030812.1	30520782	30524239	+	FKBP11	XM_018047851.1	GO:0000413(protein peptidyl-prolyl isomerization);GO:0003755(peptidyl-prolyl cis-trans isomerase activity);GO:0006457(protein folding);GO:0016021(integral component of membrane)	NA	NA	NA	PREDICTED: Capra hircus FK506 binding protein 11 (FKBP11), mRNA	87.8742	58.1066	59.0431	78.6085	106.834	78.0933
MSTRG.6198	chrNC_030820.1	64475924	64477584	+	ROMO1	XM_005688505.3	GO:0001302(replicative cell aging);GO:0003674(molecular_function);GO:0005739(mitochondrion);GO:0005743(mitochondrial inner membrane);GO:0008284(positive regulation of cell proliferation);GO:0016021(integral component of membrane);GO:0034614(cellular response to reactive oxygen species);GO:0042742(defense response to bacterium);GO:2000379(positive regulation of reactive oxygen species metabolic pr…	NA	NA	NA	PREDICTED: Capra hircus reactive oxygen species modulator 1 (ROMO1), mRNA	71.9567	80.7448	75.9583	79.0798	80.6961	77.6872
MSTRG.10916	chrNC_030832.1	1672290	1685556	-	ECI1	MSTRG.10916.1;MSTRG.10916.2;XM_018040613.1	GO:0004165(dodecenoyl-CoA delta-isomerase activity);GO:0005743(mitochondrial inner membrane);GO:0006635(fatty acid beta-oxidation);GO:0070062(extracellular exosome)	00071(Fatty acid degradation)	K13238	EC:5.3.3.8	PREDICTED: Capra hircus enoyl-CoA delta isomerase 1 (ECI1), mRNA	98.2026	77.626	91.1755	73.8256	47.3071	77.6273
MSTRG.2265	chrNC_030812.1	29763942	29781257	-	TMBIM6	XM_005679983.3;MSTRG.2265.2;MSTRG.2265.3;XM_018047820.1	GO:0005789(endoplasmic reticulum membrane);GO:0006914(autophagy);GO:0006986(response to unfolded protein);GO:0016021(integral component of membrane);GO:0031625(ubiquitin protein ligase binding);GO:0031966(mitochondrial membrane);GO:0032091(negative regulation of protein binding);GO:0032469(endoplasmic reticulum calcium ion homeostasis);GO:0051025(negative regulation of immunoglobulin secretion);G…	NA	NA	NA	PREDICTED: Capra hircus transmembrane BAX inhibitor motif containing 6 (TMBIM6), transcript variant X1, mRNA;PREDICTED: Capra hircus transmembrane BAX inhibitor motif containing 6 (TMBIM6), transcript variant X2, mRNA	91.4041	96.9838	90.2593	52.9741	55.2619	77.3766
MSTRG.8968	chrNC_030826.1	40320361	40330549	+	IGFBP4	NM_001285678.1	GO:0001558(regulation of cell growth);GO:0005615(extracellular space);GO:0010906(regulation of glucose metabolic process);GO:0031994(insulin-like growth factor I binding);GO:0031995(insulin-like growth factor II binding);GO:0043410(positive regulation of MAPK cascade);GO:0043567(regulation of insulin-like growth factor receptor signaling pathway);GO:0043568(positive regulation of insulin-like gro…	04115(p53 signaling pathway);05202(Transcriptional misregulation in cancers)	K10138	NA	Capra hircus insulin like growth factor binding protein 4 (IGFBP4), mRNA	116.262	98.6192	108.05	24.0477	39.4685	77.2895
MSTRG.2494	chrNC_030812.1	70395754	70400178	-	LOC102191308	XM_005680593.3	GO:0005576(extracellular region);GO:0005581(collagen trimer)	04974(Protein digestion and absorption)	K19479	NA	PREDICTED: Capra hircus protein HP-20 homolog (LOC102191308), mRNA	100.187	103.891	89.2731	58.8675	33.1189	77.0674
MSTRG.2764	chrNC_030812.1	112033843	112073351	-	LOC102169002;LOC102177333	MSTRG.2764.1;MSTRG.2764.2;MSTRG.2764.3;XM_018048846.1;MSTRG.2764.5;XM_018048845.1;MSTRG.2764.6;MSTRG.2764.7;MSTRG.2764.8;MSTRG.2764.9;MSTRG.2764.4;MSTRG.2764.13;MSTRG.2764.12;XM_018048841.1;XM_018048843.1;XM_018048842.1;MSTRG.2764.17;MSTRG.2764.18;MSTRG.2764.19;XM_018048844.1	GO:0005506(iron ion binding);GO:0005789(endoplasmic reticulum membrane);GO:0008392(arachidonic acid epoxygenase activity);GO:0008395(steroid hydroxylase activity);GO:0019369(arachidonic acid metabolic process);GO:0020037(heme binding);GO:0055114(oxidation-reduction process);GO:0070330(aromatase activity);GO:0070330(aromatase activity)	00140(Steroid hormone biosynthesis);04726(Serotonergic synapse);04726(Serotonergic synapse)	K07414	EC:1.14.14.1	PREDICTED: Capra hircus cytochrome P450 2D14 (LOC102177333), transcript variant X2, mRNA;PREDICTED: Capra hircus cytochrome P450 2D14 (LOC102177333), transcript variant X1, mRNA;PREDICTED: Capra hircus cytochrome P450 2D14 (LOC102169002), transcript variant X1, mRNA;PREDICTED: Capra hircus cytochrome P450 2D14 (LOC102169002), transcript variant X3, mRNA;PREDICTED: Capra hircus cytochrome P450 2D1…	54.2376	44.1173	64.185	139.049	81.334	76.5845
MSTRG.2398	chrNC_030812.1	56369002	56370982	+	LOC102189738	XM_005680345.3;XM_013963951.2;MSTRG.2398.3;XM_013963950.2	GO:0016021(integral component of membrane);GO:0016021(integral component of membrane)	NA	NA	NA	PREDICTED: Capra hircus apolipoprotein F (LOC102189738), transcript variant X1, mRNA;PREDICTED: Capra hircus apolipoprotein F (LOC102189738), transcript variant X2, mRNA;PREDICTED: Capra hircus apolipoprotein F (LOC102189738), transcript variant X3, mRNA	101.71	84.0696	80.0727	67.8799	47.9048	76.3273
MSTRG.2775	chrNC_030812.1	112845530	112939130	-	TTLL12	MSTRG.2775.1;XM_018048875.1	GO:0006464(cellular protein modification process)	NA	NA	NA	PREDICTED: Capra hircus tubulin tyrosine ligase like 12 (TTLL12), mRNA	82.5011	80.0251	86.558	60.7647	70.3537	76.0405
MSTRG.3906	chrNC_030815.1	5681461	5683931	-	HMGB2	MSTRG.3906.1;XM_018051816.1	GO:0000400(four-way junction DNA binding);GO:0000790(nuclear chromatin);GO:0000793(condensed chromosome);GO:0001158(enhancer sequence-specific DNA binding);GO:0002437(inflammatory response to antigenic stimulus);GO:0003684(damaged DNA binding);GO:0003690(double-stranded DNA binding);GO:0003697(single-stranded DNA binding);GO:0005615(extracellular space);GO:0005634(nucleus);GO:0005737(cytoplasm);G…	03410(Base excision repair)	K10802	NA	PREDICTED: Capra hircus high mobility group box 2 (HMGB2), mRNA	93.0443	88.3273	94.9747	42.8966	60.7598	76.0005
MSTRG.6526	chrNC_030821.1	80916269	80919467	-	NAPRT	XM_018058679.1;XM_018058680.1;MSTRG.6526.10;MSTRG.6526.3;MSTRG.6526.4;MSTRG.6526.5;MSTRG.6526.6;MSTRG.6526.7;MSTRG.6526.8;MSTRG.6526.9;XM_018058681.1	GO:0004514(nicotinate-nucleotide diphosphorylase (carboxylating) activity);GO:0004516(nicotinate phosphoribosyltransferase activity);GO:0005829(cytosol);GO:0009435(NAD biosynthetic process);GO:0016874(ligase activity);GO:0019358(nicotinate nucleotide salvage);GO:0019358(nicotinate nucleotide salvage)	00760(Nicotinate and nicotinamide metabolism);00760(Nicotinate and nicotinamide metabolism)	K00763	EC:6.3.4.21	PREDICTED: Capra hircus nicotinate phosphoribosyltransferase (NAPRT), transcript variant X1, mRNA;PREDICTED: Capra hircus nicotinate phosphoribosyltransferase (NAPRT), transcript variant X2, mRNA;PREDICTED: Capra hircus nicotinate phosphoribosyltransferase (NAPRT), transcript variant X3, mRNA	70.1214	61.2807	78.4475	85.8301	83.1424	75.7644
MSTRG.9902	chrNC_030829.1	11460323	11485462	-	ACAA1	MSTRG.9902.1;MSTRG.9902.3;XM_018067177.1;MSTRG.9902.2	GO:0000038(very long-chain fatty acid metabolic process);GO:0005777(peroxisome);GO:0006635(fatty acid beta-oxidation);GO:0008206(bile acid metabolic process);GO:0016020(membrane);GO:0016401(palmitoyl-CoA oxidase activity);GO:0016747(transferase activity, transferring acyl groups other than amino-acyl groups)	01212(Fatty acid metabolism);00071(Fatty acid degradation);00592(alpha-Linolenic acid metabolism);01040(Biosynthesis of unsaturated fatty acids);00280(Valine, leucine and isoleucine degradation);04146(Peroxisome);03320(PPAR signaling pathway)	K07513	EC:2.3.1.16	PREDICTED: Capra hircus acetyl-CoA acyltransferase 1 (ACAA1), mRNA	82.4181	67.7754	89.4503	81.7666	55.8607	75.4542
MSTRG.606	chrNC_030809.1	8769309	8797830	-	STMN1	XM_018056181.1;XM_005676827.3	GO:0005737(cytoplasm);GO:0005829(cytosol);GO:0005874(microtubule);GO:0007019(microtubule depolymerization);GO:0007409(axonogenesis);GO:0015631(tubulin binding);GO:0016020(membrane);GO:0031115(negative regulation of microtubule polymerization);GO:0031175(neuron projection development);GO:0043005(neuron projection);GO:0051272(positive regulation of cellular component movement);GO:0051493(regulation…	04010(MAPK signaling pathway);05206(MicroRNAs in cancer);05206(MicroRNAs in cancer)	K04381	NA	PREDICTED: Capra hircus stathmin 1 (STMN1), transcript variant X1, mRNA;PREDICTED: Capra hircus stathmin 1 (STMN1), transcript variant X2, mRNA	90.7358	76.7416	82.8623	50.5222	75.246	75.2216
MSTRG.1325	chrNC_030810.1	61606245	61615282	-	GNG5	XM_018045676.1	GO:0004871(signal transducer activity);GO:0005834(heterotrimeric G-protein complex);GO:0007186(G-protein coupled receptor signaling pathway)	04014(Ras signaling pathway);04151(PI3K-Akt signaling pathway);04062(Chemokine signaling pathway);04724(Glutamatergic synapse);04727(GABAergic synapse);04725(Cholinergic synapse);04728(Dopaminergic synapse);04726(Serotonergic synapse);04723(Retrograde endocannabinoid signaling);04713(Circadian entrainment);05200(Pathways in cancer);05032(Morphine addiction);05034(Alcoholism)	K04542	NA	PREDICTED: Capra hircus G protein subunit gamma 5 (GNG5), mRNA	89.5471	82.8695	80.3156	49.8721	71.6153	74.8439
MSTRG.1848	chrNC_030811.1	14325024	14376120	+	KEL	XM_005679618.2;MSTRG.1848.6;MSTRG.1848.4;MSTRG.1848.5;MSTRG.1848.2;MSTRG.1848.3;MSTRG.1848.7;MSTRG.1848.8	GO:0004222(metalloendopeptidase activity);GO:0005623(cell);GO:0006508(proteolysis);GO:0006874(cellular calcium ion homeostasis);GO:0008361(regulation of cell size);GO:0010961(cellular magnesium ion homeostasis);GO:0016021(integral component of membrane);GO:0031133(regulation of axon diameter);GO:0042552(myelination);GO:0048741(skeletal muscle fiber development);GO:1901380(negative regulation of p…	04640(Hematopoietic cell lineage);04614(Renin-angiotensin system);04974(Protein digestion and absorption);05010(Alzheimer's disease)	K01389	EC:3.4.24.11	PREDICTED: Capra hircus Kell blood group, metallo-endopeptidase (KEL), mRNA	59.7387	62.561	71.6444	100.158	79.5856	74.7375
MSTRG.2465	chrNC_030812.1	65286583	65371807	-	PAH	XM_005680540.2	GO:0004505(phenylalanine 4-monooxygenase activity);GO:0005506(iron ion binding);GO:0006559(L-phenylalanine catabolic process);GO:0016597(amino acid binding);GO:0055114(oxidation-reduction process);GO:0070062(extracellular exosome)	01230(Biosynthesis of amino acids);00360(Phenylalanine metabolism);00400(Phenylalanine, tyrosine and tryptophan biosynthesis)	K00500	EC:1.14.16.1	PREDICTED: Capra hircus phenylalanine hydroxylase (PAH), mRNA	79.9396	86.6108	78.8218	57.4865	70.4524	74.6622
MSTRG.8914	chrNC_030826.1	37264137	37266910	-	ATP5G1	XM_013972310.2;XM_005693700.3	GO:0005753(mitochondrial proton-transporting ATP synthase complex);GO:0005753(mitochondrial proton-transporting ATP synthase complex)	00190(Oxidative phosphorylation);05010(Alzheimer's disease);05012(Parkinson's disease);05016(Huntington's disease);05016(Huntington's disease)	K02128	NA	PREDICTED: Capra hircus ATP synthase, H+ transporting, mitochondrial Fo complex subunit C1 (subunit 9) (ATP5G1), transcript variant X2, mRNA;PREDICTED: Capra hircus ATP synthase, H+ transporting, mitochondrial Fo complex subunit C1 (subunit 9) (ATP5G1), transcript variant X1, mRNA	84.008	71.1939	77.868	55.8377	83.1954	74.4206
MSTRG.4503	chrNC_030817.1	164424	170743	-	LOC102168547	XM_018053819.1	GO:0001895(retina homeostasis);GO:0001916(positive regulation of T cell mediated cytotoxicity);GO:0001948(glycoprotein binding);GO:0002481(antigen processing and presentation of exogenous protein antigen via MHC class Ib, TAP-dependent);GO:0002726(positive regulation of T cell cytokine production);GO:0003254(regulation of membrane depolarization);GO:0005615(extracellular space);GO:0005794(Golgi a…	04612(Antigen processing and presentation)	K08055	NA	PREDICTED: Capra hircus beta-2-microglobulin (LOC102168547), mRNA	229.252	31.267	36.3374	34.7644	37.8606	73.8962
MSTRG.2521	chrNC_030812.1	74111450	74119443	-	TST	XM_005680673.3;MSTRG.2521.3;XM_018048291.1;MSTRG.2521.1;MSTRG.2521.2	GO:0004792(thiosulfate sulfurtransferase activity);GO:0005615(extracellular space);GO:0005743(mitochondrial inner membrane);GO:0008097(5S rRNA binding);GO:0030855(epithelial cell differentiation);GO:0035928(rRNA import into mitochondrion);GO:0070062(extracellular exosome);GO:0005515(protein binding);GO:0005759(mitochondrial matrix);GO:0051029(rRNA transport);GO:0051029(rRNA transport)	00920(Sulfur metabolism);00270(Cysteine and methionine metabolism);04122(Sulfur relay system);04122(Sulfur relay system)	K01011	EC:2.8.1.1;EC:2.8.1.2	PREDICTED: Capra hircus thiosulfate sulfurtransferase (TST), transcript variant X1, mRNA;PREDICTED: Capra hircus thiosulfate sulfurtransferase (TST), transcript variant X2, mRNA	86.0839	78.5104	80.9819	72.8614	50.3058	73.7487
MSTRG.12818	chrNW_017189852.1	86298	90462	+	EBP	XM_005700790.3;MSTRG.12818.1;MSTRG.12818.3	GO:0000247(C-8 sterol isomerase activity);GO:0005783(endoplasmic reticulum);GO:0016021(integral component of membrane);GO:0016126(sterol biosynthetic process);GO:0030097(hemopoiesis);GO:0047750(cholestenol delta-isomerase activity)	00100(Steroid biosynthesis)	K01824	EC:5.3.3.5	PREDICTED: Capra hircus emopamil binding protein (sterol isomerase) (EBP), mRNA	79.7697	74.9818	69.3108	68.9872	74.4549	73.5009
MSTRG.1967	chrNC_030811.1	44056832	44065021	-	IGFBP3	MSTRG.1967.1;NM_001314219.1	GO:0005615(extracellular space);GO:0032868(response to insulin)	04115(p53 signaling pathway);05202(Transcriptional misregulation in cancers)	K10138	NA	Capra hircus insulin like growth factor binding protein 3 (IGFBP3), mRNA	74.6165	101.094	77.6165	51.7727	62.2057	73.4611
MSTRG.2234	chrNC_030812.1	26768168	26775646	+	KRT8	XM_005679931.3	GO:0005198(structural molecule activity);GO:0005654(nucleoplasm);GO:0005737(cytoplasm);GO:0016363(nuclear matrix);GO:0045095(keratin filament)	05206(MicroRNAs in cancer);05169(Epstein-Barr virus infection)	K07606	NA	PREDICTED: Capra hircus keratin 8 (KRT8), mRNA	92.2323	86.0879	91.147	44.7157	52.8151	73.3996
MSTRG.12537	chrNW_017189517.1	20154897	20156142	-	LOC108634461	XM_018044186.1	GO:0005515(protein binding)	NA	NA	NA	PREDICTED: Capra hircus protein FAM127 (LOC108634461), mRNA	76.8183	63.1408	66.48	93.1394	66.6326	73.2422
MSTRG.10042	chrNC_030829.1	48196086	48247959	+	NT5DC2	XM_018066740.1	GO:0008253(5'-nucleotidase activity);GO:0016311(dephosphorylation);GO:0046872(metal ion binding)	00230(Purine metabolism);00240(Pyrimidine metabolism);00760(Nicotinate and nicotinamide metabolism)	K01081	EC:3.1.3.5	PREDICTED: Capra hircus 5'-nucleotidase domain containing 2 (NT5DC2), mRNA	69.4444	64.6616	65.5512	73.9803	92.24	73.1755
MSTRG.10458	chrNC_030830.1	22534593	22602196	+	LOC102189753	MSTRG.10458.1;MSTRG.10458.2;MSTRG.10458.4;MSTRG.10458.3;MSTRG.10458.5;XM_018038899.1;XM_018038898.1;MSTRG.10458.8;MSTRG.10458.9	GO:0004866(endopeptidase inhibitor activity);GO:0005615(extracellular space);GO:0006954(inflammatory response);GO:0006956(complement activation);GO:0010951(negative regulation of endopeptidase activity);GO:0010951(negative regulation of endopeptidase activity)	04610(Complement and coagulation cascades);05322(Systemic lupus erythematosus);05133(Pertussis);05150(Staphylococcus aureus infection);05150(Staphylococcus aureus infection)	K03989	NA	PREDICTED: Capra hircus complement C4 (LOC102189753), transcript variant X2, mRNA;PREDICTED: Capra hircus complement C4 (LOC102189753), transcript variant X1, mRNA	87.1298	50.3042	64.6518	109.802	53.4952	73.0767
MSTRG.2809	chrNC_030812.1	118598371	118603453	-	LOC108633277	MSTRG.2809.1;MSTRG.2809.2;XM_018048960.1	GO:0001843(neural tube closure);GO:0001932(regulation of protein phosphorylation);GO:0002116(semaphorin receptor complex);GO:0005887(integral component of plasma membrane);GO:0007162(negative regulation of cell adhesion);GO:0007405(neuroblast proliferation);GO:0007420(brain development);GO:0008360(regulation of cell shape);GO:0009986(cell surface);GO:0017154(semaphorin receptor activity);GO:00303…	04360(Axon guidance)	K06821	NA	PREDICTED: Capra hircus plexin-B2 (LOC108633277), mRNA	62.4265	64.4548	63.4849	108.449	66.3314	73.0293
MSTRG.6602	chrNC_030822.1	2420352	2440367	-	SERPING1	MSTRG.6602.1;XM_018059056.1;XR_001919194.1;XM_018059057.1;MSTRG.6602.3;MSTRG.6602.2	GO:0001869(negative regulation of complement activation, lectin pathway);GO:0004867(serine-type endopeptidase inhibitor activity);GO:0005615(extracellular space);GO:0010951(negative regulation of endopeptidase activity);GO:0070062(extracellular exosome);GO:0072562(blood microparticle);GO:0072562(blood microparticle)	04610(Complement and coagulation cascades);05133(Pertussis);05133(Pertussis)	K04001	NA	PREDICTED: Capra hircus serpin family G member 1 (SERPING1), transcript variant X1, mRNA;PREDICTED: Capra hircus serpin family G member 1 (SERPING1), transcript variant X2, misc_RNA;PREDICTED: Capra hircus serpin family G member 1 (SERPING1), transcript variant X3, mRNA	116.797	81.1667	79.2879	34.6563	52.7232	72.9262
MSTRG.9242	chrNC_030826.1	55507303	55516162	+	SUMO2	XM_018063832.1	GO:0005634(nucleus);GO:0016925(protein sumoylation);GO:0031386(protein tag)	03013(RNA transport)	K12160	NA	PREDICTED: Capra hircus small ubiquitin-like modifier 2 (SUMO2), mRNA	89.7783	77.847	83.2708	49.1731	64.3822	72.8903
MSTRG.575	chrNC_030809.1	6482505	6529370	-	TCEA3	MSTRG.575.1;XM_018055592.1;XM_018055597.1	GO:0003677(DNA binding);GO:0005634(nucleus);GO:0006351(transcription, DNA-templated);GO:0006357(regulation of transcription from RNA polymerase II promoter);GO:0008270(zinc ion binding);GO:0032784(regulation of DNA-templated transcription, elongation);GO:0032784(regulation of DNA-templated transcription, elongation)	00230(Purine metabolism);00240(Pyrimidine metabolism);03020(RNA polymerase);03020(RNA polymerase)	K03019	NA	PREDICTED: Capra hircus transcription elongation factor A3 (TCEA3), transcript variant X1, mRNA;PREDICTED: Capra hircus transcription elongation factor A3 (TCEA3), transcript variant X2, mRNA	80.9795	61.6043	74.4231	80.1139	67.2242	72.869
MSTRG.54	chrNC_030808.1	23875271	23876671	+		MSTRG.54.1	NA	NA	NA	NA		44.0938	46.3178	52.7967	77.5855	142.827	72.7242
MSTRG.8650	chrNC_030826.1	20234065	20247732	+	PIPOX	XM_013971877.2;MSTRG.8650.2;MSTRG.8650.3;MSTRG.8650.4;XM_005693276.3	GO:0005102(receptor binding);GO:0005777(peroxisome);GO:0008115(sarcosine oxidase activity);GO:0033514(L-lysine catabolic process to acetyl-CoA via L-pipecolate);GO:0046653(tetrahydrofolate metabolic process);GO:0050031(L-pipecolate oxidase activity);GO:0055114(oxidation-reduction process);GO:0055114(oxidation-reduction process)	00260(Glycine, serine and threonine metabolism);00310(Lysine degradation);04146(Peroxisome);04146(Peroxisome)	K00306	EC:1.5.3.1;EC:1.5.3.7	PREDICTED: Capra hircus pipecolic acid and sarcosine oxidase (PIPOX), transcript variant X1, mRNA;PREDICTED: Capra hircus pipecolic acid and sarcosine oxidase (PIPOX), transcript variant X2, mRNA	68.6872	87.177	62.4403	91.8801	52.9902	72.635
MSTRG.10503	chrNC_030830.1	23996962	24081070	+	LOC102174444;LOC102186642;LOC102173702	XM_005696425.3;MSTRG.10503.2;XR_001917065.1;XM_005696422.3	GO:0004364(glutathione transferase activity);GO:0008152(metabolic process);GO:0005737(cytoplasm);GO:0006749(glutathione metabolic process);GO:0006749(glutathione metabolic process)	00480(Glutathione metabolism);00980(Metabolism of xenobiotics by cytochrome P450);00982(Drug metabolism - cytochrome P450);05204(Chemical carcinogenesis);05204(Chemical carcinogenesis)	K00799	EC:2.5.1.18	PREDICTED: Capra hircus glutathione S-transferase A2 (LOC102174444), mRNA;PREDICTED: Capra hircus glutathione S-transferase A1-like (LOC102186642), misc_RNA;PREDICTED: Capra hircus glutathione S-transferase A2 (LOC102173702), mRNA	73.0526	89.3433	95.9217	54.4956	49.8222	72.5271
MSTRG.6293	chrNC_030820.1	76907173	76910019	+	LOC102189880	XR_310506.3	NA	NA	NA	NA	PREDICTED: Capra hircus uncharacterized LOC102189880 (LOC102189880), ncRNA	74.9304	73.6328	75.7421	71.049	67.1104	72.4929
MSTRG.12755	chrNW_017189737.1	24588	26343	+		MSTRG.12755.1	NA	NA	NA	NA		59.8646	49.9532	54.3116	93.1731	104.459	72.3523
MSTRG.1681	chrNC_030810.1	110156294	110163934	-	TAGLN2	XM_005677238.3	GO:0030855(epithelial cell differentiation);GO:0070062(extracellular exosome)	00510(N-Glycan biosynthesis)	K07441	EC:2.4.1.141	PREDICTED: Capra hircus transgelin 2 (TAGLN2), mRNA	89.9632	70.3525	73.1199	52.584	72.7601	71.7559
MSTRG.11475	chrNC_030833.1	26946173	26960401	-	LOC102189370	XM_005698440.3;XM_005698439.3;XM_005698441.3;XM_018041416.1	GO:0004364(glutathione transferase activity);GO:0005737(cytoplasm);GO:0006749(glutathione metabolic process);GO:0006749(glutathione metabolic process)	00480(Glutathione metabolism);00980(Metabolism of xenobiotics by cytochrome P450);00982(Drug metabolism - cytochrome P450);05204(Chemical carcinogenesis);05204(Chemical carcinogenesis)	K00799	EC:2.5.1.18	PREDICTED: Capra hircus glutathione S-transferase omega-1 (LOC102189370), transcript variant X3, mRNA;PREDICTED: Capra hircus glutathione S-transferase omega-1 (LOC102189370), transcript variant X1, mRNA;PREDICTED: Capra hircus glutathione S-transferase omega-1 (LOC102189370), transcript variant X4, mRNA;PREDICTED: Capra hircus glutathione S-transferase omega-1 (LOC102189370), transcript variant …	80.8236	77.5835	72.989	67.8389	58.9898	71.645
MSTRG.8778	chrNC_030826.1	26894520	26895740	-	TMEM256	XM_005694201.3	GO:0005743(mitochondrial inner membrane);GO:0016021(integral component of membrane)	NA	NA	NA	PREDICTED: Capra hircus transmembrane protein 256 (TMEM256), mRNA	85.3826	68.8844	71.2093	63.9892	68.4558	71.5843
MSTRG.3864	chrNC_030814.1	105799917	105817504	+	ARF1	XM_018051587.1;MSTRG.3864.2;MSTRG.3864.3	GO:0005525(GTP binding);GO:0005794(Golgi apparatus);GO:0005829(cytosol);GO:0005925(focal adhesion);GO:0006878(cellular copper ion homeostasis);GO:0007264(small GTPase mediated signal transduction);GO:0016192(vesicle-mediated transport);GO:0030017(sarcomere);GO:0031252(cell leading edge);GO:0044822(poly(A) RNA binding);GO:0070062(extracellular exosome)	04072(Phospholipase D signaling pathway);04144(Endocytosis);05134(Legionellosis)	K07937	NA	PREDICTED: Capra hircus ADP ribosylation factor 1 (ARF1), mRNA	79.6438	80.611	79.1738	52.8115	65.5916	71.5663
MSTRG.1984	chrNC_030811.1	50469472	50479267	-	HNRNPA2B1	XM_005679282.3;XM_013963372.2;MSTRG.1984.3;MSTRG.1984.4;MSTRG.1984.6;MSTRG.1984.7;MSTRG.1984.8;XR_309952.3;MSTRG.1984.5;XM_005679280.3;XM_005679283.3;MSTRG.1984.16;MSTRG.1984.12;MSTRG.1984.13;MSTRG.1984.14;MSTRG.1984.15;XM_005679284.3	GO:0000122(negative regulation of transcription from RNA polymerase II promoter);GO:0000166(nucleotide binding);GO:0000398(mRNA splicing, via spliceosome);GO:0003730(mRNA 3'-UTR binding);GO:0005634(nucleus);GO:0005654(nucleoplasm);GO:0005737(cytoplasm);GO:0006406(mRNA export from nucleus);GO:0016020(membrane);GO:0030529(intracellular ribonucleoprotein complex);GO:0031053(primary miRNA processing)…	03040(Spliceosome);03040(Spliceosome)	K12741	NA	PREDICTED: Capra hircus heterogeneous nuclear ribonucleoprotein A2/B1 (HNRNPA2B1), transcript variant X3, mRNA;PREDICTED: Capra hircus heterogeneous nuclear ribonucleoprotein A2/B1 (HNRNPA2B1), transcript variant X6, mRNA;PREDICTED: Capra hircus heterogeneous nuclear ribonucleoprotein A2/B1 (HNRNPA2B1), transcript variant X2, misc_RNA;PREDICTED: Capra hircus heterogeneous nuclear ribonucleoprotei…	70.4718	77.9162	75.1033	65.182	66.2945	70.9936
MSTRG.8255	chrNC_030825.1	55704915	55709429	+	SEPW1	MSTRG.8255.1;XM_005709381.3	GO:0005737(cytoplasm);GO:0016209(antioxidant activity)	NA	NA	NA	PREDICTED: Capra hircus selenoprotein W, 1 (SEPW1), mRNA	77.6963	74.6795	75.528	56.9217	69.3242	70.8299
MSTRG.789	chrNC_030809.1	37394563	37534852	-	CPS1	XM_005676491.3	GO:0000050(urea cycle);GO:0004070(aspartate carbamoyltransferase activity);GO:0004087(carbamoyl-phosphate synthase (ammonia) activity);GO:0004088(carbamoyl-phosphate synthase (glutamine-hydrolyzing) activity);GO:0004151(dihydroorotase activity);GO:0005524(ATP binding);GO:0005737(cytoplasm);GO:0005980(glycogen catabolic process);GO:0006207('de novo' pyrimidine nucleobase biosynthetic process);GO:0…	01200(Carbon metabolism);01230(Biosynthesis of amino acids);00910(Nitrogen metabolism);00250(Alanine, aspartate and glutamate metabolism);00220(Arginine biosynthesis)	K01948	EC:6.3.4.16	PREDICTED: Capra hircus carbamoyl-phosphate synthase 1 (CPS1), mRNA	62.1745	68.617	73.3532	71.254	77.7798	70.6357
MSTRG.568	chrNC_030809.1	5770402	5773472	+	C1QA	MSTRG.568.1;MSTRG.568.2;XM_005676887.3;XM_013974515.2	GO:0005581(collagen trimer);GO:0006958(complement activation, classical pathway);GO:0070062(extracellular exosome);GO:0070062(extracellular exosome)	04610(Complement and coagulation cascades);05322(Systemic lupus erythematosus);05020(Prion diseases);05133(Pertussis);05150(Staphylococcus aureus infection);05142(Chagas disease (American trypanosomiasis));05142(Chagas disease (American trypanosomiasis))	K03986	NA	PREDICTED: Capra hircus complement C1q A chain (C1QA), transcript variant X1, mRNA;PREDICTED: Capra hircus complement C1q A chain (C1QA), transcript variant X2, mRNA	171.709	46.3123	54.973	45.9917	34.0343	70.6041
MSTRG.6604	chrNC_030822.1	2455781	2469358	+	UBE2L6	XM_018059058.1;XM_018059059.1	GO:0005524(ATP binding);GO:0016567(protein ubiquitination);GO:0019941(modification-dependent protein catabolic process);GO:0032020(ISG15-protein conjugation);GO:0042296(ISG15 transferase activity);GO:0042296(ISG15 transferase activity)	04120(Ubiquitin mediated proteolysis);05012(Parkinson's disease);05012(Parkinson's disease)	K04553	EC:2.3.2.23	PREDICTED: Capra hircus ubiquitin conjugating enzyme E2 L6 (UBE2L6), transcript variant X1, mRNA;PREDICTED: Capra hircus ubiquitin conjugating enzyme E2 L6 (UBE2L6), transcript variant X2, mRNA	86.6843	73.4878	84.1094	64.086	44.3979	70.5531
MSTRG.2202	chrNC_030812.1	25517594	25524609	-	HNRNPA1	MSTRG.2202.1;MSTRG.2202.3;MSTRG.2202.2;MSTRG.2202.4;XR_001295656.2;XR_001295657.2;XM_005679849.3;XM_005679851.3	GO:0000166(nucleotide binding);GO:0005654(nucleoplasm);GO:0005737(cytoplasm);GO:0006397(mRNA processing);GO:0008380(RNA splicing);GO:0016020(membrane);GO:0030529(intracellular ribonucleoprotein complex);GO:0032211(negative regulation of telomere maintenance via telomerase);GO:0032212(positive regulation of telomere maintenance via telomerase);GO:0044822(poly(A) RNA binding);GO:0051028(mRNA transp…	03040(Spliceosome);03040(Spliceosome)	K12741	NA	PREDICTED: Capra hircus heterogeneous nuclear ribonucleoprotein A1 (HNRNPA1), transcript variant X2, misc_RNA;PREDICTED: Capra hircus heterogeneous nuclear ribonucleoprotein A1 (HNRNPA1), transcript variant X4, misc_RNA;PREDICTED: Capra hircus heterogeneous nuclear ribonucleoprotein A1 (HNRNPA1), transcript variant X1, mRNA;PREDICTED: Capra hircus heterogeneous nuclear ribonucleoprotein A1 (HNRNP…	69.3522	69.3951	98.3139	39.6783	74.5854	70.265
MSTRG.12813	chrNW_017189851.1	630686	636007	+	RANBP1	XM_018044820.1	GO:0000082(G1/S transition of mitotic cell cycle);GO:0005096(GTPase activator activity);GO:0005634(nucleus);GO:0005737(cytoplasm);GO:0005813(centrosome);GO:0006405(RNA export from nucleus);GO:0006511(ubiquitin-dependent protein catabolic process);GO:0006606(protein import into nucleus);GO:0007051(spindle organization);GO:0008536(Ran GTPase binding);GO:0043547(positive regulation of GTPase activit…	05203(Viral carcinogenesis);05166(HTLV-I infection)	K15306	NA	PREDICTED: Capra hircus RAN binding protein 1 (RANBP1), mRNA	62.2758	61.5499	61.9047	74.1159	89.6253	69.8943
MSTRG.1549	chrNC_030810.1	100590778	100599379	+	PSMD4	XM_005677612.3;XM_005677613.3	GO:0005654(nucleoplasm);GO:0005737(cytoplasm);GO:0006511(ubiquitin-dependent protein catabolic process);GO:0008540(proteasome regulatory particle, base subcomplex);GO:0005634(nucleus);GO:0005829(cytosol);GO:0022624(proteasome accessory complex);GO:0031593(polyubiquitin binding);GO:0042802(identical protein binding);GO:0043161(proteasome-mediated ubiquitin-dependent protein catabolic process);GO:0…	03050(Proteasome);05169(Epstein-Barr virus infection);05169(Epstein-Barr virus infection)	K03029	NA	PREDICTED: Capra hircus proteasome 26S subunit, non-ATPase 4 (PSMD4), transcript variant X1, mRNA;PREDICTED: Capra hircus proteasome 26S subunit, non-ATPase 4 (PSMD4), transcript variant X2, mRNA	66.0251	68.9474	74.6928	68.9942	70.0669	69.7453
MSTRG.4480	chrNC_030816.1	83335353	83345254	+	ACAT2	XM_018053432.1	GO:0003985(acetyl-CoA C-acetyltransferase activity);GO:0005730(nucleolus);GO:0005737(cytoplasm);GO:0008152(metabolic process);GO:0070062(extracellular exosome)	01200(Carbon metabolism);01212(Fatty acid metabolism);00620(Pyruvate metabolism);00630(Glyoxylate and dicarboxylate metabolism);00640(Propanoate metabolism);00650(Butanoate metabolism);00071(Fatty acid degradation);00072(Synthesis and degradation of ketone bodies);00280(Valine, leucine and isoleucine degradation);00310(Lysine degradation);00380(Tryptophan metabolism);00900(Terpenoid backbone bios…	K00626	EC:2.3.1.9	PREDICTED: Capra hircus acetyl-CoA acetyltransferase 2 (ACAT2), mRNA	74.0015	73.2369	72.8026	62.3101	66.2338	69.717
MSTRG.2954	chrNC_030813.1	59153591	59158319	-	RPL9	MSTRG.2954.2;MSTRG.2954.1;XM_005681517.3	GO:0002181(cytoplasmic translation);GO:0003723(RNA binding);GO:0003735(structural constituent of ribosome);GO:0019843(rRNA binding);GO:0022625(cytosolic large ribosomal subunit)	03010(Ribosome)	K02940	NA	PREDICTED: Capra hircus ribosomal protein L9 (RPL9), mRNA	82.4748	60.221	61.7957	68.7528	73.811	69.4111
MSTRG.8018	chrNC_030825.1	46671285	46677816	+	FXYD3	XM_013971231.2;XM_013971232.2;MSTRG.8018.3	GO:0005216(ion channel activity);GO:0005254(chloride channel activity);GO:0005515(protein binding);GO:0005789(endoplasmic reticulum membrane);GO:0005887(integral component of plasma membrane);GO:0006810(transport);GO:0006811(ion transport);GO:0006821(chloride transport);GO:0016020(membrane);GO:0016021(integral component of membrane);GO:0017080(sodium channel regulator activity);GO:0034707(chlorid…	04960(Aldosterone-regulated sodium reabsorption);04960(Aldosterone-regulated sodium reabsorption)	K13359	NA	PREDICTED: Capra hircus FXYD domain containing ion transport regulator 3 (FXYD3), transcript variant X1, mRNA;PREDICTED: Capra hircus FXYD domain containing ion transport regulator 3 (FXYD3), transcript variant X2, mRNA	58.2845	60.7562	66.0964	81.4593	79.9021	69.2997
MSTRG.11245	chrNC_030832.1	35488128	35492594	+	POLR2J	XM_005697804.3	GO:0001055(RNA polymerase II activity);GO:0005665(DNA-directed RNA polymerase II, core complex)	00230(Purine metabolism);00240(Pyrimidine metabolism);03020(RNA polymerase);05016(Huntington's disease);05169(Epstein-Barr virus infection)	K03008	NA	PREDICTED: Capra hircus RNA polymerase II subunit J (POLR2J), mRNA	58.6252	71.8544	67.7629	71.5071	76.2967	69.2092
MSTRG.6173	chrNC_030820.1	62969108	63070709	+	RALY	XM_018057731.1;XM_018057732.1;XM_018057733.1;MSTRG.6173.1;MSTRG.6173.5	GO:0005634(nucleus);GO:0044822(poly(A) RNA binding);GO:0000166(nucleotide binding);GO:0071013(catalytic step 2 spliceosome);GO:0071013(catalytic step 2 spliceosome)	03040(Spliceosome);03040(Spliceosome)	K12884	NA	PREDICTED: Capra hircus RALY heterogeneous nuclear ribonucleoprotein (RALY), transcript variant X1, mRNA;PREDICTED: Capra hircus RALY heterogeneous nuclear ribonucleoprotein (RALY), transcript variant X2, mRNA;PREDICTED: Capra hircus RALY heterogeneous nuclear ribonucleoprotein (RALY), transcript variant X3, mRNA	73.8995	64.3911	71.8225	64.8107	69.1057	68.8059
MSTRG.690	chrNC_030809.1	15050022	15073060	-	AK2	XM_005676684.3;MSTRG.690.2;XM_005676683.2;XM_018058087.1	GO:0004017(adenylate kinase activity);GO:0005524(ATP binding);GO:0005739(mitochondrion);GO:0005743(mitochondrial inner membrane);GO:0005758(mitochondrial intermembrane space);GO:0006172(ADP biosynthetic process);GO:0046033(AMP metabolic process);GO:0046034(ATP metabolic process);GO:0046939(nucleotide phosphorylation);GO:0070062(extracellular exosome);GO:0097226(sperm mitochondrial sheath);GO:0006…	00230(Purine metabolism);00230(Purine metabolism)	K00939	EC:2.7.4.3	PREDICTED: Capra hircus adenylate kinase 2 (AK2), transcript variant X2, mRNA;PREDICTED: Capra hircus adenylate kinase 2 (AK2), transcript variant X1, mRNA;PREDICTED: Capra hircus adenylate kinase 2 (AK2), transcript variant X3, mRNA	74.2173	69.2155	80.5146	49.9057	69.4433	68.6593
MSTRG.8570	chrNC_030826.1	14066856	14072606	+	LOC102170772	XM_005701408.3	GO:0002548(monocyte chemotaxis);GO:0005615(extracellular space);GO:0006954(inflammatory response);GO:0007186(G-protein coupled receptor signaling pathway);GO:0008009(chemokine activity);GO:0008201(heparin binding);GO:0030593(neutrophil chemotaxis);GO:0043547(positive regulation of GTPase activity);GO:0048020(CCR chemokine receptor binding);GO:0048247(lymphocyte chemotaxis);GO:0050729(positive reg…	04060(Cytokine-cytokine receptor interaction);04620(Toll-like receptor signaling pathway);04062(Chemokine signaling pathway);05323(Rheumatoid arthritis);05132(Salmonella infection);05142(Chagas disease (American trypanosomiasis))	K05408	NA	PREDICTED: Capra hircus regakine-1 (LOC102170772), mRNA	181.927	33.1037	51.3065	49.9326	26.1038	68.4747
MSTRG.6118	chrNC_030820.1	58864336	58875132	-	FAM210B	XM_018057637.1;MSTRG.6118.2	GO:0016021(integral component of membrane)	NA	NA	NA	PREDICTED: Capra hircus family with sequence similarity 210 member B (FAM210B), mRNA	54.4065	63.1563	75.0448	59.6923	88.6397	68.188
MSTRG.7484	chrNC_030824.1	8311879	8334865	-	DYNLL1	MSTRG.7484.1;MSTRG.7484.2;XM_018061128.1	GO:0000776(kinetochore);GO:0005737(cytoplasm);GO:0005813(centrosome);GO:0007017(microtubule-based process);GO:0008180(COP9 signalosome);GO:0016020(membrane);GO:0021762(substantia nigra development);GO:0030286(dynein complex);GO:0042326(negative regulation of phosphorylation);GO:0070062(extracellular exosome);GO:0072686(mitotic spindle)	04962(Vasopressin-regulated water reabsorption)	K10418	NA	PREDICTED: Capra hircus dynein light chain LC8-type 1 (DYNLL1), mRNA	66.3545	72.2964	72.232	64	65.5693	68.0904
MSTRG.4602	chrNC_030817.1	21933903	21947121	+	ERH	XM_018054040.1	GO:0001649(osteoblast differentiation);GO:0006221(pyrimidine nucleotide biosynthetic process);GO:0007049(cell cycle);GO:0008327(methyl-CpG binding);GO:0016020(membrane);GO:0030496(midbody);GO:0034709(methylosome);GO:0044822(poly(A) RNA binding);GO:0045747(positive regulation of Notch signaling pathway)	04340(Hedgehog signaling pathway)	K06233	NA	PREDICTED: Capra hircus enhancer of rudimentary homolog (Drosophila) (ERH), mRNA	69.2753	71.4811	72.8706	59.0754	66.909	67.9223
MSTRG.3456	chrNC_030814.1	71335314	71341985	-	HNRNPAB	MSTRG.3456.1;MSTRG.3456.3;MSTRG.3456.2;XM_018050576.1;XM_018050577.1;XM_018050578.1	GO:0000166(nucleotide binding);GO:0005654(nucleoplasm);GO:0019013(viral nucleocapsid);GO:0030529(intracellular ribonucleoprotein complex);GO:0044822(poly(A) RNA binding);GO:0044822(poly(A) RNA binding)	03015(mRNA surveillance pathway);03015(mRNA surveillance pathway)	K14411	NA	PREDICTED: Capra hircus heterogeneous nuclear ribonucleoprotein A/B (HNRNPAB), transcript variant X1, mRNA;PREDICTED: Capra hircus heterogeneous nuclear ribonucleoprotein A/B (HNRNPAB), transcript variant X2, mRNA;PREDICTED: Capra hircus heterogeneous nuclear ribonucleoprotein A/B (HNRNPAB), transcript variant X3, mRNA	67.4445	69.7028	71.4224	65.4407	65.3132	67.8647
MSTRG.6221	chrNC_030820.1	65750256	65759991	+	LOC108637357	XM_018056870.1	GO:0004579(dolichyl-diphosphooligosaccharide-protein glycotransferase activity);GO:0005634(nucleus);GO:0006487(protein N-linked glycosylation);GO:0008250(oligosaccharyltransferase complex);GO:0016021(integral component of membrane)	00510(N-Glycan biosynthesis);04141(Protein processing in endoplasmic reticulum)	K12667	NA	PREDICTED: Capra hircus dolichyl-diphosphooligosaccharide--protein glycosyltransferase subunit 2-like (LOC108637357), mRNA	66.0871	59.9039	60.8303	88.8961	63.1713	67.7777
MSTRG.3836	chrNC_030814.1	104108074	104118328	-	FKBP8	MSTRG.3836.1;XM_018049967.1;XM_018049966.1;XM_018049968.1;MSTRG.3836.5;NM_001285571.1	GO:0001708(cell fate specification);GO:0005740(mitochondrial envelope);GO:0006457(protein folding);GO:0007224(smoothened signaling pathway);GO:0021904(dorsal/ventral neural tube patterning);GO:0030176(integral component of endoplasmic reticulum membrane);GO:0030513(positive regulation of BMP signaling pathway);GO:0035264(multicellular organism growth);GO:0042802(identical protein binding);GO:0043…	NA	NA	NA	PREDICTED: Capra hircus FK506 binding protein 8 (FKBP8), transcript variant X2, mRNA;PREDICTED: Capra hircus FK506 binding protein 8 (FKBP8), transcript variant X1, mRNA;PREDICTED: Capra hircus FK506 binding protein 8 (FKBP8), transcript variant X3, mRNA;Capra hircus FK506 binding protein 8 (FKBP8), mRNA	70.0866	68.7301	72.2837	60.0138	66.6862	67.5601
MSTRG.3746	chrNC_030814.1	97984531	97990654	-	RAD23A	MSTRG.3746.1;XM_005682272.3;XM_018051252.1	GO:0003684(damaged DNA binding);GO:0005634(nucleus);GO:0006289(nucleotide-excision repair);GO:0031593(polyubiquitin binding);GO:0032434(regulation of proteasomal ubiquitin-dependent protein catabolic process);GO:0043161(proteasome-mediated ubiquitin-dependent protein catabolic process);GO:0045070(positive regulation of viral genome replication);GO:1990381(ubiquitin-specific protease binding);GO:1…	04141(Protein processing in endoplasmic reticulum);03420(Nucleotide excision repair);03420(Nucleotide excision repair)	K10839	NA	PREDICTED: Capra hircus RAD23 homolog A, nucleotide excision repair protein (RAD23A), transcript variant X1, mRNA;PREDICTED: Capra hircus RAD23 homolog A, nucleotide excision repair protein (RAD23A), transcript variant X2, mRNA	68.5996	72.413	83.4967	50.0767	62.1877	67.3547
MSTRG.6613	chrNC_030822.1	2733072	2742821	+	SSRP1	XM_018059073.1;XM_018059074.1;MSTRG.6613.3;MSTRG.6613.4	GO:0003677(DNA binding);GO:0003682(chromatin binding);GO:0005515(protein binding);GO:0005634(nucleus);GO:0005654(nucleoplasm);GO:0005694(chromosome);GO:0005730(nucleolus);GO:0005737(cytoplasm);GO:0006260(DNA replication);GO:0006281(DNA repair);GO:0006355(regulation of transcription, DNA-templated);GO:0006366(transcription from RNA polymerase II promoter);GO:0006368(transcription elongation from R…	03410(Base excision repair);03410(Base excision repair)	K10802	NA	PREDICTED: Capra hircus structure specific recognition protein 1 (SSRP1), transcript variant X1, mRNA;PREDICTED: Capra hircus structure specific recognition protein 1 (SSRP1), transcript variant X2, mRNA	74.7338	73.4752	72.5059	52.5312	63.3633	67.3219
MSTRG.12583	chrNW_017189517.1	37413943	37426081	-	MORF4L2	XM_005700188.3;XM_005700186.3;XM_005700189.3;MSTRG.12583.1;XM_005700187.3;XM_005700190.3	GO:0005730(nucleolus);GO:0005886(plasma membrane);GO:0006338(chromatin remodeling);GO:0006342(chromatin silencing);GO:0016575(histone deacetylation);GO:0035267(NuA4 histone acetyltransferase complex);GO:0043967(histone H4 acetylation);GO:0043968(histone H2A acetylation);GO:0043968(histone H2A acetylation)	04310(Wnt signaling pathway);04310(Wnt signaling pathway)	K03068	NA	PREDICTED: Capra hircus mortality factor 4 like 2 (MORF4L2), transcript variant X3, mRNA;PREDICTED: Capra hircus mortality factor 4 like 2 (MORF4L2), transcript variant X1, mRNA;PREDICTED: Capra hircus mortality factor 4 like 2 (MORF4L2), transcript variant X4, mRNA;PREDICTED: Capra hircus mortality factor 4 like 2 (MORF4L2), transcript variant X2, mRNA;PREDICTED: Capra hircus mortality factor 4 …	64.8375	71.1644	70.3604	74.2954	55.5812	67.2478
MSTRG.2063	chrNC_030811.1	79940290	79988091	+	LOC100860959	MSTRG.2063.1;MSTRG.2063.2;XM_013963208.2;XM_013963211.2;XM_013963212.2;XM_013963206.2;XM_013963209.2;XM_013963210.2;NM_001285580.1	GO:0005794(Golgi apparatus);GO:0006955(immune response);GO:0007155(cell adhesion);GO:0007166(cell surface receptor signaling pathway);GO:0007204(positive regulation of cytosolic calcium ion concentration);GO:0016020(membrane);GO:0016021(integral component of membrane);GO:0016324(apical plasma membrane);GO:0030299(intestinal cholesterol absorption);GO:0031526(brush border membrane);GO:0031623(rece…	04152(AMPK signaling pathway);04512(ECM-receptor interaction);04145(Phagosome);04640(Hematopoietic cell lineage);04920(Adipocytokine signaling pathway);03320(PPAR signaling pathway);04975(Fat digestion and absorption);04931(Insulin resistance);05144(Malaria);05144(Malaria)	K06259	NA	PREDICTED: Capra hircus CD36-like protein (LOC100860959), transcript variant X2, mRNA;PREDICTED: Capra hircus CD36-like protein (LOC100860959), transcript variant X5, mRNA;PREDICTED: Capra hircus CD36-like protein (LOC100860959), transcript variant X6, mRNA;PREDICTED: Capra hircus CD36-like protein (LOC100860959), transcript variant X1, mRNA;PREDICTED: Capra hircus CD36-like protein (LOC100860959…	57.1443	66.3468	74.3029	77.9877	60.3961	67.2356
MSTRG.12573	chrNW_017189517.1	36718191	36816385	-	RNF128	XM_013976196.2;XM_018044229.1;MSTRG.12573.3;MSTRG.12573.5;MSTRG.12573.4;MSTRG.12573.7;MSTRG.12573.6	GO:0005770(late endosome);GO:0005783(endoplasmic reticulum);GO:0005794(Golgi apparatus);GO:0008270(zinc ion binding);GO:0016021(integral component of membrane);GO:0016567(protein ubiquitination);GO:0031647(regulation of protein stability);GO:0042036(negative regulation of cytokine biosynthetic process);GO:0061630(ubiquitin protein ligase activity);GO:0061630(ubiquitin protein ligase activity)	NA	NA	NA	PREDICTED: Capra hircus ring finger protein 128, E3 ubiquitin protein ligase (RNF128), transcript variant X1, mRNA;PREDICTED: Capra hircus ring finger protein 128, E3 ubiquitin protein ligase (RNF128), transcript variant X2, mRNA	56.9479	60.8181	59.6971	61.4467	96.0878	66.9995
MSTRG.11379	chrNC_030832.1	42506859	42518919	-	ADAP1	MSTRG.11379.2;XM_018039917.1;MSTRG.11379.1	GO:0005096(GTPase activator activity);GO:0005634(nucleus);GO:0005737(cytoplasm);GO:0005886(plasma membrane);GO:0043547(positive regulation of GTPase activity)	04144(Endocytosis)	K12486	NA	PREDICTED: Capra hircus ArfGAP with dual PH domains 1 (ADAP1), mRNA	72.381	58.7495	69.4439	72.664	61.443	66.9363
MSTRG.5426	chrNC_030818.1	77590208	77634096	+	APOB	MSTRG.5426.3;XM_018055590.1;MSTRG.5426.2;MSTRG.5426.4;MSTRG.5426.5	GO:0001701(in utero embryonic development);GO:0005543(phospholipid binding);GO:0005783(endoplasmic reticulum);GO:0005794(Golgi apparatus);GO:0005886(plasma membrane);GO:0006642(triglyceride mobilization);GO:0007283(spermatogenesis);GO:0007399(nervous system development);GO:0008201(heparin binding);GO:0008203(cholesterol metabolic process);GO:0009566(fertilization);GO:0009615(response to virus);GO…	04975(Fat digestion and absorption);04977(Vitamin digestion and absorption)	K14462	NA	PREDICTED: Capra hircus apolipoprotein B (APOB), mRNA	57.232	65.1627	60.7295	93.1545	57.4444	66.7446
MSTRG.7601	chrNC_030824.1	19459530	19460040	-	LOC102179223	XM_005691346.3	GO:0000398(mRNA splicing, via spliceosome);GO:0005634(nucleus);GO:0005737(cytoplasm);GO:0006464(cellular protein modification process);GO:0031386(protein tag)	04212(Longevity regulating pathway - worm)	K13113	NA	PREDICTED: Capra hircus ubiquitin-like protein 5 (LOC102179223), mRNA	67.0539	69.2183	61.9892	64.7289	69.1052	66.4191
MSTRG.12671	chrNW_017189579.1	38	2034	-	LOC102183974	MSTRG.12671.2;XM_018044492.1;MSTRG.12671.1;MSTRG.12671.4;MSTRG.12671.5;MSTRG.12671.6;MSTRG.12671.7	GO:0070062(extracellular exosome);GO:0072562(blood microparticle)	04610(Complement and coagulation cascades);05322(Systemic lupus erythematosus);05020(Prion diseases);05146(Amoebiasis)	K03999	NA	PREDICTED: Capra hircus complement component C8 gamma chain (LOC102183974), mRNA	64.8768	59.4417	62.2696	82.5931	62.816	66.3994
MSTRG.787	chrNC_030809.1	32406990	32476380	+	FN1	XM_005676508.3;XM_018059785.1;XM_018059810.1;XM_018059789.1;XM_018059841.1;MSTRG.787.6;XM_018059793.1;XM_018059825.1;XM_018059801.1;XM_018059817.1;XM_018059832.1;XM_018059847.1;MSTRG.787.13;MSTRG.787.14;MSTRG.787.15;MSTRG.787.16;MSTRG.787.17	GO:0002020(protease binding);GO:0005178(integrin binding);GO:0005577(fibrinogen complex);GO:0005605(basal lamina);GO:0005793(endoplasmic reticulum-Golgi intermediate compartment);GO:0007044(cell-substrate junction assembly);GO:0007161(calcium-independent cell-matrix adhesion);GO:0010628(positive regulation of gene expression);GO:0010952(positive regulation of peptidase activity);GO:0016324(apical…	04151(PI3K-Akt signaling pathway);04512(ECM-receptor interaction);04810(Regulation of actin cytoskeleton);04510(Focal adhesion);05200(Pathways in cancer);05205(Proteoglycans in cancer);05222(Small cell lung cancer);04933(AGE-RAGE signaling pathway in diabetic complications);05100(Bacterial invasion of epithelial cells);05146(Amoebiasis);05146(Amoebiasis)	K05717	NA	PREDICTED: Capra hircus fibronectin 1 (FN1), transcript variant X1, mRNA;PREDICTED: Capra hircus fibronectin 1 (FN1), transcript variant X2, mRNA;PREDICTED: Capra hircus fibronectin 1 (FN1), transcript variant X6, mRNA;PREDICTED: Capra hircus fibronectin 1 (FN1), transcript variant X3, mRNA;PREDICTED: Capra hircus fibronectin 1 (FN1), transcript variant X10, mRNA;PREDICTED: Capra hircus fibronect…	73.6132	80.6267	74.861	67.4256	35.2634	66.358
MSTRG.9439	chrNC_030827.1	62535221	62598456	+	DAP	XM_018065627.1	GO:0006914(autophagy);GO:0010507(negative regulation of autophagy);GO:0034198(cellular response to amino acid starvation);GO:0070513(death domain binding);GO:0097190(apoptotic signaling pathway)	NA	NA	NA	PREDICTED: Capra hircus death associated protein (DAP), mRNA	84.9804	60.4455	76.3954	47.4347	59.9845	65.8481
MSTRG.10541	chrNC_030830.1	31923729	31950245	-	SLC22A7	MSTRG.10541.1;MSTRG.10541.2;MSTRG.10541.3;MSTRG.10541.4;MSTRG.10541.5;MSTRG.10541.6;MSTRG.10541.7;MSTRG.10541.8;XM_005696333.3;XM_013973922.2;MSTRG.10541.11;MSTRG.10541.12	GO:0016021(integral component of membrane);GO:0022857(transmembrane transporter activity);GO:0055085(transmembrane transport);GO:0055085(transmembrane transport)	04976(Bile secretion);04976(Bile secretion)	K08204	NA	PREDICTED: Capra hircus solute carrier family 22 member 7 (SLC22A7), transcript variant X1, mRNA;PREDICTED: Capra hircus solute carrier family 22 member 7 (SLC22A7), transcript variant X2, mRNA	61.6493	70.4328	68.8366	77.0937	50.5561	65.7137
MSTRG.5084	chrNC_030818.1	2784462	2873516	-	LOC102179291	MSTRG.5084.1;XM_005686262.3	GO:0004129(cytochrome-c oxidase activity);GO:0005743(mitochondrial inner membrane);GO:0045277(respiratory chain complex IV);GO:0046872(metal ion binding);GO:1902600(hydrogen ion transmembrane transport)	00190(Oxidative phosphorylation);04260(Cardiac muscle contraction);05010(Alzheimer's disease);05012(Parkinson's disease);05016(Huntington's disease);04932(Non-alcoholic fatty liver disease (NAFLD))	K02265	NA	PREDICTED: Capra hircus cytochrome c oxidase subunit 5B, mitochondrial (LOC102179291), mRNA	118.563	59.3594	69.0895	33.9158	45.9726	65.3801
MSTRG.9427	chrNC_030827.1	48369920	48370755	+	LOC102187166	XR_001296975.2	GO:0003735(structural constituent of ribosome);GO:0005634(nucleus);GO:0006364(rRNA processing);GO:0006412(translation);GO:0022627(cytosolic small ribosomal subunit);GO:0042274(ribosomal small subunit biogenesis);GO:0042593(glucose homeostasis);GO:0048471(perinuclear region of cytoplasm)	03010(Ribosome);04066(HIF-1 signaling pathway);04151(PI3K-Akt signaling pathway);04150(mTOR signaling pathway);04910(Insulin signaling pathway);05205(Proteoglycans in cancer)	K02991	NA	PREDICTED: Capra hircus 40S ribosomal protein S6 pseudogene (LOC102187166), misc_RNA	61.6896	57.5566	58.4776	75.7849	72.8868	65.2791
MSTRG.3461	chrNC_030814.1	71513376	71517243	-	TMED9	MSTRG.3461.1;XM_005682768.3	GO:0005789(endoplasmic reticulum membrane);GO:0006810(transport);GO:0016021(integral component of membrane)	04068(FoxO signaling pathway);04213(Longevity regulating pathway - multiple species);04931(Insulin resistance)	K07200	NA	PREDICTED: Capra hircus transmembrane p24 trafficking protein 9 (TMED9), mRNA	76.3757	67.8766	65.3792	52.4317	64.0418	65.221
MSTRG.6803	chrNC_030822.1	35888955	35890379	-	TAF10	MSTRG.6803.3;MSTRG.6803.1;MSTRG.6803.2;XM_018059475.1	GO:0000125(PCAF complex);GO:0003700(transcription factor activity, sequence-specific DNA binding);GO:0003713(transcription coactivator activity);GO:0004402(histone acetyltransferase activity);GO:0005669(transcription factor TFIID complex);GO:0006355(regulation of transcription, DNA-templated);GO:0006367(transcription initiation from RNA polymerase II promoter);GO:0016578(histone deubiquitination)…	03022(Basal transcription factors);05168(Herpes simplex infection)	K03134	NA	PREDICTED: Capra hircus TATA-box binding protein associated factor 10 (TAF10), mRNA	65.2437	59.1231	55.6419	72.6495	73.199	65.1715
MSTRG.8323	chrNC_030825.1	58452560	58465286	-	ETFB	MSTRG.8323.2;MSTRG.8323.1;XM_018062964.1	GO:0005759(mitochondrial matrix);GO:0009055(electron carrier activity);GO:0033539(fatty acid beta-oxidation using acyl-CoA dehydrogenase);GO:0070062(extracellular exosome)	NA	NA	NA	PREDICTED: Capra hircus electron transfer flavoprotein beta subunit (ETFB), mRNA	66.604	64.577	63.3013	68.7535	62.5415	65.1554
MSTRG.10169	chrNC_030829.1	54138066	54167766	-	CLEC3B	MSTRG.10169.1;XM_018067001.1	GO:0001652(granular component);GO:0005509(calcium ion binding);GO:0005615(extracellular space);GO:0005737(cytoplasm);GO:0008201(heparin binding);GO:0010756(positive regulation of plasminogen activation);GO:0030246(carbohydrate binding);GO:0030282(bone mineralization);GO:0036143(kringle domain binding);GO:0070062(extracellular exosome);GO:0071560(cellular response to transforming growth factor bet…	NA	NA	NA	PREDICTED: Capra hircus C-type lectin domain family 3 member B (CLEC3B), mRNA	74.7188	55.5362	57.7242	83.8277	51.2516	64.6117
MSTRG.7307	chrNC_030823.1	69321569	69323198	+	FLVCR1	MSTRG.7307.1;MSTRG.7307.2	NA	NA	NA	NA		65.4943	53.7034	103.604	63.799	35.5411	64.4283
MSTRG.1841	chrNC_030811.1	13807206	13815866	-	ZYX	MSTRG.1841.2;MSTRG.1841.1;XM_018046841.1	GO:0001725(stress fiber);GO:0005515(protein binding);GO:0005634(nucleus);GO:0005737(cytoplasm);GO:0005856(cytoskeleton);GO:0005913(cell-cell adherens junction);GO:0005925(focal adhesion);GO:0007155(cell adhesion);GO:0007160(cell-matrix adhesion);GO:0007179(transforming growth factor beta receptor signaling pathway);GO:0007229(integrin-mediated signaling pathway);GO:0008270(zinc ion binding);GO:00…	04510(Focal adhesion)	K06273	NA	PREDICTED: Capra hircus zyxin (ZYX), mRNA	70.8977	51.3138	68.0201	58.7779	71.046	64.0111
MSTRG.5629	chrNC_030818.1	105784369	105785017	-	MRPL41	XM_005687389.3	GO:0003735(structural constituent of ribosome);GO:0005762(mitochondrial large ribosomal subunit);GO:0006412(translation);GO:0044822(poly(A) RNA binding)	NA	NA	NA	PREDICTED: Capra hircus mitochondrial ribosomal protein L41 (MRPL41), mRNA	65.5105	61.5454	66.7009	60.4846	65.7226	63.9928
MSTRG.11165	chrNC_030832.1	27568663	27628320	-	CHCHD2	MSTRG.11165.1;XM_005697756.3	GO:0005634(nucleus);GO:0005739(mitochondrion);GO:0008134(transcription factor binding);GO:0043565(sequence-specific DNA binding);GO:0045944(positive regulation of transcription from RNA polymerase II promoter);GO:1900037(regulation of cellular response to hypoxia)	00270(Cysteine and methionine metabolism);05206(MicroRNAs in cancer)	K00558	EC:2.1.1.37	PREDICTED: Capra hircus coiled-coil-helix-coiled-coil-helix domain containing 2 (CHCHD2), mRNA	78.3901	65.0501	69.8392	52.8216	52.5654	63.7333
MSTRG.10927	chrNC_030832.1	2174775	2192889	-	SRRM2	XR_001917221.1;XM_018040148.1;XM_018040149.1;XR_001917220.1;XR_001917222.1;XR_001917226.1;XR_001917227.1;XR_001917228.1;XR_001917229.1;XR_001917230.1;MSTRG.10927.11;MSTRG.10927.13;MSTRG.10927.12;MSTRG.10927.14;MSTRG.10927.16;MSTRG.10927.15;MSTRG.10927.17;XR_001917223.1;XR_001917225.1;MSTRG.10927.22;MSTRG.10927.21;MSTRG.10927.23;MSTRG.10927.24;MSTRG.10927.20;XR_001917224.1;MSTRG.10927.26;MSTRG.109…	GO:0015030(Cajal body);GO:0016607(nuclear speck);GO:0044822(poly(A) RNA binding);GO:0047485(protein N-terminus binding);GO:0070742(C2H2 zinc finger domain binding);GO:0071013(catalytic step 2 spliceosome);GO:0071013(catalytic step 2 spliceosome)	NA	NA	NA	PREDICTED: Capra hircus serine/arginine repetitive matrix 2 (SRRM2), transcript variant X2, misc_RNA;PREDICTED: Capra hircus serine/arginine repetitive matrix 2 (SRRM2), transcript variant X8, mRNA;PREDICTED: Capra hircus serine/arginine repetitive matrix 2 (SRRM2), transcript variant X9, mRNA;PREDICTED: Capra hircus serine/arginine repetitive matrix 2 (SRRM2), transcript variant X1, misc_RNA;PRE…	80.5238	69.113	70.2262	44.5263	54.0841	63.6947
MSTRG.3767	chrNC_030814.1	98208395	98223571	+	MAN2B1	MSTRG.3767.1;NM_001314340.1;MSTRG.3767.3;MSTRG.3767.4	GO:0004559(alpha-mannosidase activity);GO:0005764(lysosome);GO:0006013(mannose metabolic process);GO:0006517(protein deglycosylation);GO:0007611(learning or memory);GO:0008270(zinc ion binding);GO:0030246(carbohydrate binding)	00511(Other glycan degradation);04142(Lysosome)	K12311	EC:3.2.1.24	Capra hircus mannosidase alpha class 2B member 1 (MAN2B1), mRNA	66.1955	57.9566	57.286	67.3804	68.4231	63.4483
MSTRG.8787	chrNC_030826.1	27044782	27050942	+	EIF4A1	XM_005693519.2;MSTRG.8787.2	GO:0003725(double-stranded RNA binding);GO:0003743(translation initiation factor activity);GO:0004004(ATP-dependent RNA helicase activity);GO:0005524(ATP binding);GO:0005737(cytoplasm);GO:0006413(translational initiation);GO:0006446(regulation of translational initiation);GO:0010468(regulation of gene expression);GO:0010501(RNA secondary structure unwinding);GO:0016020(membrane);GO:0044822(poly(A…	03013(RNA transport)	K03257	NA	PREDICTED: Capra hircus eukaryotic translation initiation factor 4A1 (EIF4A1), mRNA	63.8934	63.0824	69.7585	55.0299	64.4483	63.2425
MSTRG.5748	chrNC_030819.1	51160795	51161452	+	MRPL57	XM_018056552.1;XM_018056553.1	GO:0003735(structural constituent of ribosome);GO:0005761(mitochondrial ribosome);GO:0032543(mitochondrial translation);GO:0032543(mitochondrial translation)	NA	NA	NA	PREDICTED: Capra hircus mitochondrial ribosomal protein L57 (MRPL57), transcript variant X1, mRNA;PREDICTED: Capra hircus mitochondrial ribosomal protein L57 (MRPL57), transcript variant X2, mRNA	51.4476	41.4895	52.7786	84.1777	85.2313	63.0249
MSTRG.5966	chrNC_030820.1	39613841	39614573	-	LOC102181791	XR_001296396.2	GO:0000470(maturation of LSU-rRNA);GO:0003723(RNA binding);GO:0003735(structural constituent of ribosome);GO:0005730(nucleolus);GO:0005925(focal adhesion);GO:0006412(translation);GO:0016020(membrane);GO:0022625(cytosolic large ribosomal subunit);GO:0044822(poly(A) RNA binding);GO:0070062(extracellular exosome)	03010(Ribosome)	K02865	NA	PREDICTED: Capra hircus 60S ribosomal protein L10a pseudogene (LOC102181791), misc_RNA	64.1665	70.1443	62.0756	52.5728	65.9998	62.9918
MSTRG.5875	chrNC_030820.1	12201703	12215444	+	ATP5C1	XM_018056966.1;XM_018056965.1	GO:0005515(protein binding);GO:0005753(mitochondrial proton-transporting ATP synthase complex);GO:0015986(ATP synthesis coupled proton transport);GO:0043209(myelin sheath);GO:0044822(poly(A) RNA binding);GO:0045261(proton-transporting ATP synthase complex, catalytic core F(1));GO:0046933(proton-transporting ATP synthase activity, rotational mechanism);GO:0046961(proton-transporting ATPase activit…	00190(Oxidative phosphorylation);05010(Alzheimer's disease);05012(Parkinson's disease);05016(Huntington's disease);05016(Huntington's disease)	K02136	NA	PREDICTED: Capra hircus ATP synthase, H+ transporting, mitochondrial F1 complex, gamma polypeptide 1 (ATP5C1), transcript variant X2, mRNA;PREDICTED: Capra hircus ATP synthase, H+ transporting, mitochondrial F1 complex, gamma polypeptide 1 (ATP5C1), transcript variant X1, mRNA	70.5347	65.8288	72.5128	45.1289	59.3899	62.679
MSTRG.9831	chrNC_030828.1	67734943	67740374	-	LOC108638524	MSTRG.9831.1;XR_001919908.1	GO:0005753(mitochondrial proton-transporting ATP synthase complex);GO:0016021(integral component of membrane)	NA	NA	NA	PREDICTED: Capra hircus uncharacterized LOC108638524 (LOC108638524), ncRNA	63.9337	61.9521	63.2614	62.7664	60.6855	62.5198
MSTRG.9745	chrNC_030828.1	58459085	58460222	+	LOC102185401	MSTRG.9745.1;MSTRG.9745.2	NA	NA	NA	NA		77.7047	61.6155	56.4597	60.0052	56.5087	62.4587
MSTRG.5442	chrNC_030818.1	86459667	86482730	+	PDIA6	XM_018055659.1;MSTRG.5442.2;MSTRG.5442.3;MSTRG.5442.4	GO:0003756(protein disulfide isomerase activity);GO:0005783(endoplasmic reticulum);GO:0005793(endoplasmic reticulum-Golgi intermediate compartment);GO:0006457(protein folding);GO:0034976(response to endoplasmic reticulum stress);GO:0043277(apoptotic cell clearance);GO:0045454(cell redox homeostasis);GO:0070062(extracellular exosome)	04141(Protein processing in endoplasmic reticulum)	K09584	EC:5.3.4.1	PREDICTED: Capra hircus protein disulfide isomerase family A member 6 (PDIA6), mRNA	76.1388	59.2517	60.7082	55.4673	60.5135	62.4159
MSTRG.2848	chrNC_030813.1	15922309	15965996	+	CFI	XM_005681316.3	GO:0004252(serine-type endopeptidase activity);GO:0005044(scavenger receptor activity);GO:0005615(extracellular space);GO:0006508(proteolysis);GO:0006898(receptor-mediated endocytosis);GO:0016020(membrane);GO:0070062(extracellular exosome)	04610(Complement and coagulation cascades);05150(Staphylococcus aureus infection)	K01333	EC:3.4.21.45	PREDICTED: Capra hircus complement factor I (CFI), mRNA	85.948	66.8425	65.8872	54.6218	38.5449	62.3689
MSTRG.468	chrNC_030808.1	145806199	145824726	-	FTCD	MSTRG.468.1;MSTRG.468.2;XM_018052349.1;XM_018052343.1;MSTRG.468.14;MSTRG.468.12;MSTRG.468.10;MSTRG.468.11;MSTRG.468.13;MSTRG.468.6;MSTRG.468.7;MSTRG.468.8;MSTRG.468.9;MSTRG.468.5;XM_018052357.1	GO:0000139(Golgi membrane);GO:0005542(folic acid binding);GO:0005829(cytosol);GO:0008017(microtubule binding);GO:0016740(transferase activity);GO:0030412(formimidoyltetrahydrofolate cyclodeaminase activity);GO:0030868(smooth endoplasmic reticulum membrane);GO:0044237(cellular metabolic process);GO:0070062(extracellular exosome);GO:0070062(extracellular exosome)	00340(Histidine metabolism);00670(One carbon pool by folate);00670(One carbon pool by folate)	K13990	EC:2.1.2.5;EC:4.3.1.4	PREDICTED: Capra hircus formimidoyltransferase cyclodeaminase (FTCD), transcript variant X2, mRNA;PREDICTED: Capra hircus formimidoyltransferase cyclodeaminase (FTCD), transcript variant X1, mRNA;PREDICTED: Capra hircus formimidoyltransferase cyclodeaminase (FTCD), transcript variant X3, mRNA	56.8117	62	64.0763	80.1552	48.5615	62.3209
MSTRG.12374	chrNW_017189516.1	19657457	19659943	-	NDUFB11	XM_005700819.2	GO:0005747(mitochondrial respiratory chain complex I);GO:0016021(integral component of membrane);GO:0055114(oxidation-reduction process)	00190(Oxidative phosphorylation);05010(Alzheimer's disease);05012(Parkinson's disease);05016(Huntington's disease);04932(Non-alcoholic fatty liver disease (NAFLD))	K11351	NA	PREDICTED: Capra hircus NADH:ubiquinone oxidoreductase subunit B11 (NDUFB11), mRNA	73.0172	68.3946	71.0828	44.037	54.3279	62.1719
MSTRG.434	chrNC_030808.1	142847021	142860162	-	U2AF1	XM_018051755.1;XM_018051757.1	GO:0000166(nucleotide binding);GO:0000398(mRNA splicing, via spliceosome);GO:0003723(RNA binding);GO:0016607(nuclear speck);GO:0046872(metal ion binding);GO:0050733(RS domain binding);GO:0089701(U2AF);GO:0089701(U2AF)	03040(Spliceosome);05131(Shigellosis);05131(Shigellosis)	K12836	NA	PREDICTED: Capra hircus U2 small nuclear RNA auxiliary factor 1 (U2AF1), transcript variant X1, mRNA;PREDICTED: Capra hircus U2 small nuclear RNA auxiliary factor 1 (U2AF1), transcript variant X2, mRNA	62.0916	64.0302	61.3169	60.6507	61.8697	61.9918
MSTRG.4640	chrNC_030817.1	30771191	30771755	-	LOC102177244	XM_005685937.3	GO:0003735(structural constituent of ribosome);GO:0006412(translation);GO:0022625(cytosolic large ribosomal subunit)	03010(Ribosome)	K02889	NA	PREDICTED: Capra hircus 60S ribosomal protein L21-like (LOC102177244), mRNA	52.7565	57.673	57.2194	72.8229	68.4114	61.7766
MSTRG.7456	chrNC_030824.1	6737301	6743467	+	ISCU	XM_018061082.1	GO:0005759(mitochondrial matrix);GO:0005829(cytosol);GO:0006879(cellular iron ion homeostasis);GO:0008198(ferrous iron binding);GO:0032947(protein complex scaffold);GO:0036455(iron-sulfur transferase activity);GO:0044571([2Fe-2S] cluster assembly);GO:0051537(2 iron, 2 sulfur cluster binding);GO:0051539(4 iron, 4 sulfur cluster binding);GO:0097428(protein maturation by iron-sulfur cluster transfer)	NA	NA	NA	PREDICTED: Capra hircus iron-sulfur cluster assembly enzyme (ISCU), mRNA	70.1656	63.3877	69.8104	50.9467	54.3867	61.7394
MSTRG.1831	chrNC_030811.1	8465509	8483328	+	PDIA4	XM_018046820.1;MSTRG.1831.2;MSTRG.1831.3	GO:0003756(protein disulfide isomerase activity);GO:0005788(endoplasmic reticulum lumen);GO:0009986(cell surface);GO:0044822(poly(A) RNA binding);GO:0045454(cell redox homeostasis)	04141(Protein processing in endoplasmic reticulum);04918(Thyroid hormone synthesis)	K09582	EC:5.3.4.1	PREDICTED: Capra hircus protein disulfide isomerase family A member 4 (PDIA4), mRNA	73.8437	49.9352	53.0144	55.4619	76.4376	61.7386
MSTRG.396	chrNC_030808.1	135201755	135247216	-	LOC102172488	MSTRG.396.3;MSTRG.396.2;XM_005675552.3;XM_005675553.3;MSTRG.396.1;MSTRG.396.6;MSTRG.396.7;MSTRG.396.8	GO:0004857(enzyme inhibitor activity);GO:0005615(extracellular space);GO:0043086(negative regulation of catalytic activity);GO:0043086(negative regulation of catalytic activity)	04066(HIF-1 signaling pathway);04978(Mineral absorption);04978(Mineral absorption)	K14736	NA	PREDICTED: Capra hircus inhibitor of carbonic anhydrase (LOC102172488), transcript variant X1, mRNA;PREDICTED: Capra hircus inhibitor of carbonic anhydrase (LOC102172488), transcript variant X2, mRNA	57.7076	54.1721	59.6135	82.929	54.0321	61.6908
MSTRG.1563	chrNC_030810.1	101825755	101830579	-	S100A11	XM_005677583.3	GO:0001726(ruffle);GO:0005509(calcium ion binding);GO:0005615(extracellular space);GO:0005634(nucleus);GO:0005737(cytoplasm);GO:0042127(regulation of cell proliferation);GO:0042803(protein homodimerization activity);GO:0044548(S100 protein binding);GO:0048306(calcium-dependent protein binding);GO:0070062(extracellular exosome)	NA	NA	NA	PREDICTED: Capra hircus S100 calcium binding protein A11 (S100A11), mRNA	47.0023	96.8586	61.6483	26.4724	76.2391	61.6441
MSTRG.1149	chrNC_030810.1	18187099	18190216	-	HYI	MSTRG.1149.1;XM_005709577.3;XM_018042897.1;XM_018042904.1	GO:0003674(molecular_function);GO:0005515(protein binding);GO:0005575(cellular_component);GO:0008150(biological_process);GO:0008903(hydroxypyruvate isomerase activity);GO:0008903(hydroxypyruvate isomerase activity)	00630(Glyoxylate and dicarboxylate metabolism);00630(Glyoxylate and dicarboxylate metabolism)	K01816	EC:5.3.1.22	PREDICTED: Capra hircus hydroxypyruvate isomerase (putative) (HYI), transcript variant X1, mRNA;PREDICTED: Capra hircus hydroxypyruvate isomerase (putative) (HYI), transcript variant X2, mRNA;PREDICTED: Capra hircus hydroxypyruvate isomerase (putative) (HYI), transcript variant X3, mRNA	71.6627	58.9515	69.8085	54.9412	52.7887	61.6305
MSTRG.11516	chrNC_030833.1	30347409	30416348	-	SCD;LOC102175922	MSTRG.11516.1;XR_001297322.2;MSTRG.11516.3;NM_001285619.1	GO:0000049(tRNA binding);GO:0003746(translation elongation factor activity);GO:0003924(GTPase activity);GO:0005515(protein binding);GO:0005525(GTP binding);GO:0005615(extracellular space);GO:0005622(intracellular);GO:0005634(nucleus);GO:0005730(nucleolus);GO:0005737(cytoplasm);GO:0005829(cytosol);GO:0006414(translational elongation);GO:0019901(protein kinase binding);GO:0030864(cortical actin cyt…	03013(RNA transport);05134(Legionellosis);01212(Fatty acid metabolism);01040(Biosynthesis of unsaturated fatty acids);04152(AMPK signaling pathway);03320(PPAR signaling pathway)	K03231;K00507	EC:1.14.19.1	PREDICTED: Capra hircus elongation factor 1-alpha 1 pseudogene (LOC102175922), misc_RNA;Capra hircus stearoyl-CoA desaturase (SCD), mRNA	62.9107	66.6078	63.7183	57.2885	57.2791	61.5609
MSTRG.6048	chrNC_030820.1	51867864	51873257	-	NOP56	MSTRG.6048.7;MSTRG.6048.2;MSTRG.6048.3;MSTRG.6048.4;MSTRG.6048.5;MSTRG.6048.6;MSTRG.6048.1;XM_018057443.1	GO:0000154(rRNA modification);GO:0005654(nucleoplasm);GO:0005737(cytoplasm);GO:0030515(snoRNA binding);GO:0031428(box C/D snoRNP complex);GO:0032040(small-subunit processome)	03008(Ribosome biogenesis in eukaryotes)	K14564	NA	PREDICTED: Capra hircus NOP56 ribonucleoprotein (NOP56), mRNA	45.5907	57.5789	48.3842	77.6167	78.5104	61.5362
MSTRG.11795	chrNC_030835.1	4070614	4109970	+	GLUD1	XM_005699318.3;MSTRG.11795.2;MSTRG.11795.3;MSTRG.11795.4;MSTRG.11795.5	GO:0004352(glutamate dehydrogenase (NAD+) activity);GO:0004353(glutamate dehydrogenase [NAD(P)+] activity);GO:0005515(protein binding);GO:0005524(ATP binding);GO:0005525(GTP binding);GO:0005737(cytoplasm);GO:0005739(mitochondrion);GO:0005759(mitochondrial matrix);GO:0006537(glutamate biosynthetic process);GO:0006538(glutamate catabolic process);GO:0006541(glutamine metabolic process);GO:0008652(c…	01200(Carbon metabolism);00910(Nitrogen metabolism);00250(Alanine, aspartate and glutamate metabolism);00220(Arginine biosynthesis);00471(D-Glutamine and D-glutamate metabolism);04964(Proximal tubule bicarbonate reclamation)	K00261	EC:1.4.1.3	PREDICTED: Capra hircus glutamate dehydrogenase 1 (GLUD1), mRNA	74.4643	52.969	53.3817	46.1447	80.4509	61.4821
MSTRG.5222	chrNC_030818.1	29156107	29169684	-	CALM2	XM_018055199.1;XM_005686574.3	GO:0000922(spindle pole);GO:0002027(regulation of heart rate);GO:0005509(calcium ion binding);GO:0005513(detection of calcium ion);GO:0005634(nucleus);GO:0005813(centrosome);GO:0005876(spindle microtubule);GO:0010880(regulation of release of sequestered calcium ion into cytosol by sarcoplasmic reticulum);GO:0019901(protein kinase binding);GO:0019904(protein domain specific binding);GO:0021762(sub…	04020(Calcium signaling pathway);04070(Phosphatidylinositol signaling system);04114(Oocyte meiosis);04910(Insulin signaling pathway);04912(GnRH signaling pathway);04916(Melanogenesis);04261(Adrenergic signaling in cardiomyocytes);04270(Vascular smooth muscle contraction);04744(Phototransduction);04014(Ras signaling pathway);04015(Rap1 signaling pathway);04024(cAMP signaling pathway);04022(cGMP - …	K02183	NA	PREDICTED: Capra hircus calmodulin 2 (CALM2), transcript variant X2, mRNA;PREDICTED: Capra hircus calmodulin 2 (CALM2), transcript variant X1, mRNA	73.8878	67.9046	66.8376	43.8568	53.7463	61.2466
MSTRG.11854	chrNC_030835.1	17625879	17658855	+	PSAP	XM_005699158.3;XM_018042179.1;XM_018042181.1;MSTRG.11854.4	GO:0005764(lysosome);GO:0006665(sphingolipid metabolic process);GO:0001664(G-protein coupled receptor binding);GO:0005615(extracellular space);GO:0005737(cytoplasm);GO:0006687(glycosphingolipid metabolic process);GO:0007193(adenylate cyclase-inhibiting G-protein coupled receptor signaling pathway);GO:0008047(enzyme activator activity);GO:0019216(regulation of lipid metabolic process);GO:0043085(p…	04142(Lysosome);04142(Lysosome)	K12382	NA	PREDICTED: Capra hircus prosaposin (PSAP), transcript variant X1, mRNA;PREDICTED: Capra hircus prosaposin (PSAP), transcript variant X2, mRNA;PREDICTED: Capra hircus prosaposin (PSAP), transcript variant X3, mRNA	100.348	51.8543	66.1702	46.0571	40.5985	61.0056
MSTRG.1279	chrNC_030810.1	37914413	37923843	+	ANGPTL3	NM_001285709.1;MSTRG.1279.1	GO:0004859(phospholipase inhibitor activity);GO:0005178(integrin binding);GO:0005615(extracellular space);GO:0005769(early endosome);GO:0005794(Golgi apparatus);GO:0006071(glycerol metabolic process);GO:0006631(fatty acid metabolic process);GO:0007160(cell-matrix adhesion);GO:0007165(signal transduction);GO:0008083(growth factor activity);GO:0008203(cholesterol metabolic process);GO:0009395(phosp…	03320(PPAR signaling pathway)	K08767	NA	Capra hircus angiopoietin like 3 (ANGPTL3), mRNA	65.715	76.4202	65.9866	47.4488	49.3166	60.9774
MSTRG.12179	chrNC_030836.1	44090907	44098361	+		MSTRG.12179.1;MSTRG.12179.2;MSTRG.12179.3;MSTRG.12179.4;MSTRG.12179.5	NA	NA	NA	NA		60.9338	60.842	67.0014	78.0532	37.5137	60.8688
MSTRG.4176	chrNC_030815.1	88552405	88557241	-	CKS2	XM_005684236.3	GO:0007127(meiosis I);GO:0016538(cyclin-dependent protein serine/threonine kinase regulator activity);GO:0045859(regulation of protein kinase activity);GO:0051301(cell division)	05200(Pathways in cancer);05222(Small cell lung cancer)	K02219	NA	PREDICTED: Capra hircus CDC28 protein kinase regulatory subunit 2 (CKS2), mRNA	58.7139	63.6079	72.2496	49.2761	59.9928	60.7681
MSTRG.8202	chrNC_030825.1	53907712	53934647	+	LOC102169696	MSTRG.8202.1;MSTRG.8202.2;MSTRG.8202.3;MSTRG.8202.4;XM_018062587.1	GO:0016021(integral component of membrane);GO:0016491(oxidoreductase activity);GO:0055114(oxidation-reduction process)	01212(Fatty acid metabolism);00062(Fatty acid elongation);00140(Steroid hormone biosynthesis);01040(Biosynthesis of unsaturated fatty acids)	K10251	EC:1.1.1.62;EC:1.1.1.330	PREDICTED: Capra hircus very-long-chain 3-oxoacyl-CoA reductase-B (LOC102169696), mRNA	74.0021	60.4545	57.7424	60.8833	50.5527	60.727
MSTRG.4108	chrNC_030815.1	74466218	74490532	+	LOC102186117	XM_005684043.3;MSTRG.4108.2;MSTRG.4108.3;MSTRG.4108.4;XM_005684044.3;MSTRG.4108.6;MSTRG.4108.7	GO:0003885(D-arabinono-1,4-lactone oxidase activity);GO:0005789(endoplasmic reticulum membrane);GO:0016021(integral component of membrane);GO:0019853(L-ascorbic acid biosynthetic process);GO:0050105(L-gulonolactone oxidase activity);GO:0050660(flavin adenine dinucleotide binding);GO:0055114(oxidation-reduction process);GO:0055114(oxidation-reduction process)	00053(Ascorbate and aldarate metabolism);00053(Ascorbate and aldarate metabolism)	K00103	EC:1.1.3.8	PREDICTED: Capra hircus L-gulonolactone oxidase (LOC102186117), transcript variant X1, mRNA;PREDICTED: Capra hircus L-gulonolactone oxidase (LOC102186117), transcript variant X2, mRNA	76.513	65.0182	62.998	51.5689	47.1572	60.6511
MSTRG.13071	chrNW_017215238.1	182	4546	-	LOC108635404	MSTRG.13071.1;XM_018045559.1;MSTRG.13071.3	GO:0003674(molecular_function);GO:0005739(mitochondrion);GO:0043457(regulation of cellular respiration)	04611(Platelet activation);04974(Protein digestion and absorption);04933(AGE-RAGE signaling pathway in diabetic complications);05146(Amoebiasis)	K19720	NA	PREDICTED: Capra hircus collagen alpha-1(I) chain-like (LOC108635404), partial mRNA	47.5888	42.2294	41.8163	76.4139	94.8046	60.5706
MSTRG.2389	chrNC_030812.1	56168087	56173841	+	ATP5B	XM_005680331.2;MSTRG.2389.2	GO:0001525(angiogenesis);GO:0001649(osteoblast differentiation);GO:0005515(protein binding);GO:0005524(ATP binding);GO:0005634(nucleus);GO:0005753(mitochondrial proton-transporting ATP synthase complex);GO:0005886(plasma membrane);GO:0006629(lipid metabolic process);GO:0006933(negative regulation of cell adhesion involved in substrate-bound cell migration);GO:0009986(cell surface);GO:0015986(ATP …	00190(Oxidative phosphorylation);05010(Alzheimer's disease);05012(Parkinson's disease);05016(Huntington's disease)	K02133	EC:3.6.3.14	PREDICTED: Capra hircus ATP synthase, H+ transporting, mitochondrial F1 complex, beta polypeptide (ATP5B), mRNA	82.3277	61.3543	76.0134	37.3352	45.4038	60.4869
MSTRG.12781	chrNW_017189840.1	156463	162313	-	DUSP9	XM_018044793.1;MSTRG.12781.1;XM_018044792.1	GO:0000188(inactivation of MAPK activity);GO:0004725(protein tyrosine phosphatase activity);GO:0005737(cytoplasm);GO:0017017(MAP kinase tyrosine/serine/threonine phosphatase activity);GO:0035335(peptidyl-tyrosine dephosphorylation);GO:0035335(peptidyl-tyrosine dephosphorylation)	04010(MAPK signaling pathway);04550(Signaling pathways regulating pluripotency of stem cells);04550(Signaling pathways regulating pluripotency of stem cells)	K18498	EC:3.1.3.16;EC:3.1.3.48	PREDICTED: Capra hircus dual specificity phosphatase 9 (DUSP9), transcript variant X2, mRNA;PREDICTED: Capra hircus dual specificity phosphatase 9 (DUSP9), transcript variant X1, mRNA	68.6576	63.9826	81.4116	37.3361	49.6345	60.2045
MSTRG.3703	chrNC_030814.1	95774367	95805881	-	ACP5	MSTRG.3703.2;XM_018051132.1;XM_018051133.1;MSTRG.3703.1	GO:0003993(acid phosphatase activity);GO:0005764(lysosome);GO:0008198(ferrous iron binding);GO:0008199(ferric iron binding);GO:0016311(dephosphorylation);GO:0032496(response to lipopolysaccharide);GO:0032691(negative regulation of interleukin-1 beta production);GO:0032695(negative regulation of interleukin-12 production);GO:0032720(negative regulation of tumor necrosis factor production);GO:00329…	04142(Lysosome);04380(Osteoclast differentiation);05323(Rheumatoid arthritis);05323(Rheumatoid arthritis)	K14379	EC:3.1.3.2	PREDICTED: Capra hircus acid phosphatase 5, tartrate resistant (ACP5), transcript variant X1, mRNA;PREDICTED: Capra hircus acid phosphatase 5, tartrate resistant (ACP5), transcript variant X2, mRNA	73.1848	67.6796	64.6005	50.8367	43.3435	59.929
MSTRG.12478	chrNW_017189516.1	55224752	55225629	-	LOC102187665	XM_005701085.3	GO:0003735(structural constituent of ribosome);GO:0006412(translation);GO:0019843(rRNA binding);GO:0022627(cytosolic small ribosomal subunit)	03010(Ribosome)	K02987	NA	PREDICTED: Capra hircus 40S ribosomal protein S4, X isoform (LOC102187665), mRNA	65.5158	73.0369	73.2161	29.9735	57.8968	59.9278
MSTRG.2096	chrNC_030811.1	101517039	101525261	+	NDUFA4	MSTRG.2096.1;XM_005678973.3	GO:0004129(cytochrome-c oxidase activity);GO:0005747(mitochondrial respiratory chain complex I);GO:0005751(mitochondrial respiratory chain complex IV);GO:0032403(protein complex binding);GO:0055114(oxidation-reduction process);GO:0070062(extracellular exosome);GO:1902600(hydrogen ion transmembrane transport)	00190(Oxidative phosphorylation);05010(Alzheimer's disease);05012(Parkinson's disease);05016(Huntington's disease);04932(Non-alcoholic fatty liver disease (NAFLD))	K03948	NA	PREDICTED: Capra hircus NDUFA4, mitochondrial complex associated (NDUFA4), mRNA	64.3126	73.1859	61.6843	50.9494	49.198	59.866
MSTRG.2228	chrNC_030812.1	26595725	26608650	-	SOAT2	MSTRG.2228.1;MSTRG.2228.2;XM_005679929.3;XM_013963765.2;XM_013963764.2;XM_005679926.3;XM_005679927.3;XR_001295667.2;MSTRG.2228.9;XR_001295666.2;XM_013963766.2;XM_005679930.3;MSTRG.2228.13;MSTRG.2228.14;MSTRG.2228.15;MSTRG.2228.16;MSTRG.2228.17;MSTRG.2228.18;XM_018047699.1;MSTRG.2228.20;MSTRG.2228.21;MSTRG.2228.22;XM_018047700.1;MSTRG.2228.25;MSTRG.2228.26;MSTRG.2228.24;MSTRG.2228.27;XM_018047698.…	GO:0000062(fatty-acyl-CoA binding);GO:0005789(endoplasmic reticulum membrane);GO:0005903(brush border);GO:0008203(cholesterol metabolic process);GO:0015485(cholesterol binding);GO:0016021(integral component of membrane);GO:0033344(cholesterol efflux);GO:0034379(very-low-density lipoprotein particle assembly);GO:0034435(cholesterol esterification);GO:0034736(cholesterol O-acyltransferase activity)…	00100(Steroid biosynthesis);00100(Steroid biosynthesis)	K00637	EC:2.3.1.26	PREDICTED: Capra hircus sterol O-acyltransferase 2 (SOAT2), transcript variant X7, mRNA;PREDICTED: Capra hircus sterol O-acyltransferase 2 (SOAT2), transcript variant X6, mRNA;PREDICTED: Capra hircus sterol O-acyltransferase 2 (SOAT2), transcript variant X5, mRNA;PREDICTED: Capra hircus sterol O-acyltransferase 2 (SOAT2), transcript variant X1, mRNA;PREDICTED: Capra hircus sterol O-acyltransferas…	57.3123	56.9838	56.2022	62.4408	66.3058	59.849
MSTRG.10338	chrNC_030830.1	18187692	18194933	+	LOC102184572	XM_005696750.3;XM_005696751.3	GO:0000788(nuclear nucleosome);GO:0003677(DNA binding);GO:0005654(nucleoplasm);GO:0005737(cytoplasm);GO:0006334(nucleosome assembly);GO:0046982(protein heterodimerization activity);GO:0070062(extracellular exosome);GO:0070062(extracellular exosome)	05203(Viral carcinogenesis);05322(Systemic lupus erythematosus);05034(Alcoholism);05034(Alcoholism)	K11252	NA	PREDICTED: Capra hircus histone H2B type 1-M (LOC102184572), transcript variant X1, mRNA;PREDICTED: Capra hircus histone H2B type 1-M (LOC102184572), transcript variant X2, mRNA	73.6753	62.9652	67.5239	52.5975	42.2901	59.8104
MSTRG.549	chrNC_030809.1	3980920	3993678	-	DDOST	MSTRG.549.2;MSTRG.549.1;XM_005677030.3	GO:0004576(oligosaccharyl transferase activity);GO:0006486(protein glycosylation);GO:0008250(oligosaccharyltransferase complex);GO:0016021(integral component of membrane);GO:0018279(protein N-linked glycosylation via asparagine)	00510(N-Glycan biosynthesis);04141(Protein processing in endoplasmic reticulum)	K12670	NA	PREDICTED: Capra hircus dolichyl-diphosphooligosaccharide--protein glycosyltransferase non-catalytic subunit (DDOST), mRNA	60.9236	64.6197	60.8888	55.2257	57.3875	59.8091
MSTRG.532	chrNC_030809.1	2263122	2295344	-	ALDH4A1	MSTRG.532.1;MSTRG.532.3;MSTRG.532.2;XM_018054760.1	GO:0003842(1-pyrroline-5-carboxylate dehydrogenase activity);GO:0004029(aldehyde dehydrogenase (NAD) activity);GO:0005759(mitochondrial matrix);GO:0006537(glutamate biosynthetic process);GO:0006561(proline biosynthetic process);GO:0010133(proline catabolic process to glutamate);GO:0042802(identical protein binding);GO:0055114(oxidation-reduction process)	00250(Alanine, aspartate and glutamate metabolism);00330(Arginine and proline metabolism)	K00294	EC:1.2.1.88	PREDICTED: Capra hircus aldehyde dehydrogenase 4 family member A1 (ALDH4A1), mRNA	70.0819	54.3886	65.7627	58.3461	50.1113	59.7381
MSTRG.12146	chrNC_030836.1	42966457	42969481	+	FKBP2	XM_005699849.2;XM_005699851.3;XM_005699850.3;XM_018042788.1	GO:0000413(protein peptidyl-prolyl isomerization);GO:0003755(peptidyl-prolyl cis-trans isomerase activity);GO:0006457(protein folding);GO:0016021(integral component of membrane);GO:0005528(FK506 binding);GO:0005789(endoplasmic reticulum membrane);GO:0061077(chaperone-mediated protein folding);GO:0061077(chaperone-mediated protein folding)	04915(Estrogen signaling pathway);04915(Estrogen signaling pathway)	K09571	EC:5.2.1.8	PREDICTED: Capra hircus FK506 binding protein 2 (FKBP2), transcript variant X1, mRNA;PREDICTED: Capra hircus FK506 binding protein 2 (FKBP2), transcript variant X3, mRNA;PREDICTED: Capra hircus FK506 binding protein 2 (FKBP2), transcript variant X2, mRNA;PREDICTED: Capra hircus FK506 binding protein 2 (FKBP2), transcript variant X4, mRNA	56.8294	56.445	55.9564	60.221	69.1909	59.7286
MSTRG.3806	chrNC_030814.1	102951174	102956644	+	ANKLE1	MSTRG.3806.1;MSTRG.3806.2;XM_018051374.1	GO:0016021(integral component of membrane)	00790(Folate biosynthesis)	K01077	EC:3.1.3.1	PREDICTED: Capra hircus ankyrin repeat and LEM domain containing 1 (ANKLE1), mRNA	53.4645	60.4547	65.7761	58.0855	60.2445	59.6051
MSTRG.126	chrNC_030808.1	64133324	64141467	-	LOC102170266	XM_005674965.2	GO:0005758(mitochondrial intermembrane space);GO:0006825(copper ion transport);GO:0016531(copper chaperone activity)	00190(Oxidative phosphorylation)	K02260	NA	PREDICTED: Capra hircus cytochrome c oxidase copper chaperone (LOC102170266), mRNA	55.3503	50.6993	56.4743	76.1283	58.6547	59.4614
MSTRG.6201	chrNC_030820.1	64665608	64666531	-	SCAND1	XM_018057796.1	GO:0003700(transcription factor activity, sequence-specific DNA binding);GO:0003713(transcription coactivator activity);GO:0005634(nucleus);GO:0006355(regulation of transcription, DNA-templated)	04722(Neurotrophin signaling pathway)	K12458	NA	PREDICTED: Capra hircus SCAN domain containing 1 (SCAND1), mRNA	86.1876	51.728	59.8377	55.136	44.2698	59.4318
MSTRG.3381	chrNC_030814.1	66005364	66018441	-	LEAP2;AFF4	MSTRG.3381.1;MSTRG.3381.2;MSTRG.3381.3;MSTRG.3381.5;MSTRG.3381.4;XM_005682929.3	GO:0005576(extracellular region);GO:0042742(defense response to bacterium)	NA	NA	NA	PREDICTED: Capra hircus liver enriched antimicrobial peptide 2 (LEAP2), mRNA	75.0869	57.5934	65.0612	49.4049	49.697	59.3687
MSTRG.5242	chrNC_030818.1	37788806	37790555	-	LOC108637143	XR_001918790.1;MSTRG.5242.2;MSTRG.5242.3	GO:0000049(tRNA binding);GO:0003746(translation elongation factor activity);GO:0003924(GTPase activity);GO:0005515(protein binding);GO:0005525(GTP binding);GO:0005615(extracellular space);GO:0005622(intracellular);GO:0005634(nucleus);GO:0005730(nucleolus);GO:0005737(cytoplasm);GO:0005829(cytosol);GO:0006414(translational elongation);GO:0019901(protein kinase binding);GO:0030864(cortical actin cyt…	03013(RNA transport);05134(Legionellosis)	K03231	NA	PREDICTED: Capra hircus elongation factor 1-alpha 1 pseudogene (LOC108637143), misc_RNA	124.535	47.0347	47.094	40.7704	37.2051	59.3279
MSTRG.1620	chrNC_030810.1	104756259	104765241	-	CLK2	XM_018046236.1;XM_018046237.1;XM_018046240.1;MSTRG.1620.7;MSTRG.1620.4;MSTRG.1620.5;MSTRG.1620.6;XM_018046238.1;XM_018046239.1	GO:0004674(protein serine/threonine kinase activity);GO:0005524(ATP binding);GO:0005634(nucleus);GO:0005654(nucleoplasm);GO:0006468(protein phosphorylation);GO:0004713(protein tyrosine kinase activity);GO:0010212(response to ionizing radiation);GO:0018108(peptidyl-tyrosine phosphorylation);GO:0032526(response to retinoic acid);GO:0043484(regulation of RNA splicing);GO:0045721(negative regulation …	05134(Legionellosis);05134(Legionellosis)	K08823	EC:2.7.12.1	PREDICTED: Capra hircus CDC like kinase 2 (CLK2), transcript variant X1, mRNA;PREDICTED: Capra hircus CDC like kinase 2 (CLK2), transcript variant X2, mRNA;PREDICTED: Capra hircus CDC like kinase 2 (CLK2), transcript variant X5, mRNA;PREDICTED: Capra hircus CDC like kinase 2 (CLK2), transcript variant X3, mRNA;PREDICTED: Capra hircus CDC like kinase 2 (CLK2), transcript variant X4, mRNA	51.7957	52.5134	50.9249	80.1462	59.1294	58.9019
MSTRG.10850	chrNC_030832.1	433746	449696	+	PIGQ	MSTRG.10850.1;MSTRG.10850.2;MSTRG.10850.5;XM_018039959.1;MSTRG.10850.7;MSTRG.10850.8;XR_001917210.1;XM_018039958.1;XM_018039961.1;XM_018039960.1;MSTRG.10850.13;MSTRG.10850.14	GO:0006506(GPI anchor biosynthetic process);GO:0016021(integral component of membrane);GO:0017176(phosphatidylinositol N-acetylglucosaminyltransferase activity);GO:0000506(glycosylphosphatidylinositol-N-acetylglucosaminyltransferase (GPI-GnT) complex);GO:0000506(glycosylphosphatidylinositol-N-acetylglucosaminyltransferase (GPI-GnT) complex)	00563(Glycosylphosphatidylinositol(GPI)-anchor biosynthesis);00563(Glycosylphosphatidylinositol(GPI)-anchor biosynthesis)	K03860	NA	PREDICTED: Capra hircus phosphatidylinositol glycan anchor biosynthesis class Q (PIGQ), transcript variant X2, mRNA;PREDICTED: Capra hircus phosphatidylinositol glycan anchor biosynthesis class Q (PIGQ), transcript variant X5, misc_RNA;PREDICTED: Capra hircus phosphatidylinositol glycan anchor biosynthesis class Q (PIGQ), transcript variant X1, mRNA;PREDICTED: Capra hircus phosphatidylinositol gl…	55.6419	52.6068	58.0305	74.3748	53.6363	58.858
MSTRG.10504	chrNC_030830.1	24021330	24036383	+	LOC102174170	XM_018038498.1;XM_018038499.1;NM_001314321.1	GO:0004364(glutathione transferase activity);GO:0005737(cytoplasm);GO:0006749(glutathione metabolic process);GO:0006749(glutathione metabolic process)	00480(Glutathione metabolism);00980(Metabolism of xenobiotics by cytochrome P450);00982(Drug metabolism - cytochrome P450);05204(Chemical carcinogenesis);05204(Chemical carcinogenesis)	K00799	EC:2.5.1.18	PREDICTED: Capra hircus glutathione S-transferase A1 (LOC102174170), transcript variant X1, mRNA;PREDICTED: Capra hircus glutathione S-transferase A1 (LOC102174170), transcript variant X2, mRNA;Capra hircus glutathione S-transferase A1 (LOC102174170), mRNA	77.0783	45.2888	63.6603	75.3385	32.8313	58.8394
MSTRG.9866	chrNC_030829.1	1304124	1310905	+	SEC61G	XM_005695496.3	GO:0005622(intracellular);GO:0006605(protein targeting);GO:0015450(P-P-bond-hydrolysis-driven protein transmembrane transporter activity);GO:0016021(integral component of membrane);GO:0071806(protein transmembrane transport)	03060(Protein export);04141(Protein processing in endoplasmic reticulum);04145(Phagosome)	K07342	NA	PREDICTED: Capra hircus Sec61 translocon gamma subunit (SEC61G), mRNA	66.7136	58.7644	70.2723	47.6389	50.7906	58.836
MSTRG.10790	chrNC_030831.1	46096728	46105461	-	ATP5A1	MSTRG.10790.1;XM_018039617.1	GO:0001937(negative regulation of endothelial cell proliferation);GO:0005524(ATP binding);GO:0005753(mitochondrial proton-transporting ATP synthase complex);GO:0005886(plasma membrane);GO:0006629(lipid metabolic process);GO:0008180(COP9 signalosome);GO:0015986(ATP synthesis coupled proton transport);GO:0015991(ATP hydrolysis coupled proton transport);GO:0042288(MHC class I protein binding);GO:004…	00190(Oxidative phosphorylation);05010(Alzheimer's disease);05012(Parkinson's disease);05016(Huntington's disease)	K02132	NA	PREDICTED: Capra hircus ATP synthase, H+ transporting, mitochondrial F1 complex, alpha subunit 1, cardiac muscle (ATP5A1), mRNA	72.5405	64.3836	69.826	46.4204	40.9228	58.8187
MSTRG.13001	chrNW_017202952.1	3942	8292	+	LOC108635078	MSTRG.13001.1;XM_018045373.1	NA	NA	NA	NA	PREDICTED: Capra hircus basic proline-rich protein-like (LOC108635078), mRNA	43.2246	42.5172	34.7108	81.9327	91.4618	58.7694
MSTRG.12866	chrNW_017190004.1	5497	12353	-	LOC108634774;LOC108634776	XM_018045013.1;XM_018045015.1	GO:0003700(transcription factor activity, sequence-specific DNA binding);GO:0005634(nucleus);GO:0006355(regulation of transcription, DNA-templated);GO:0043565(sequence-specific DNA binding);GO:0044212(transcription regulatory region DNA binding);GO:0046872(metal ion binding)	04611(Platelet activation);04974(Protein digestion and absorption);04933(AGE-RAGE signaling pathway in diabetic complications);05146(Amoebiasis)	K19720	NA	PREDICTED: Capra hircus collagen alpha-1(I) chain-like (LOC108634774), mRNA;PREDICTED: Capra hircus zinc finger protein 532-like (LOC108634776), mRNA	49.2505	39.5444	34.2211	79.7372	90.6669	58.684
MSTRG.3164	chrNC_030813.1	117026728	117054824	-	MAEA	XM_018049866.1;XM_018049867.1;XM_018049868.1	GO:0003779(actin binding);GO:0005737(cytoplasm);GO:0005856(cytoskeleton);GO:0005886(plasma membrane);GO:0007049(cell cycle);GO:0016363(nuclear matrix);GO:0043249(erythrocyte maturation);GO:0051301(cell division);GO:0005634(nucleus);GO:0005819(spindle);GO:0005826(actomyosin contractile ring);GO:0005887(integral component of plasma membrane);GO:0007010(cytoskeleton organization);GO:0007155(cell adh…	NA	NA	NA	PREDICTED: Capra hircus macrophage erythroblast attacher (MAEA), transcript variant X1, mRNA;PREDICTED: Capra hircus macrophage erythroblast attacher (MAEA), transcript variant X2, mRNA;PREDICTED: Capra hircus macrophage erythroblast attacher (MAEA), transcript variant X3, mRNA	55.6554	47.3068	48.4911	77.203	64.7171	58.6747
MSTRG.9301	chrNC_030827.1	3263173	3276952	+	NPM1	XM_013972699.2;XM_013972697.2;XM_013972698.2;XM_013972700.2	GO:0003713(transcription coactivator activity);GO:0004860(protein kinase inhibitor activity);GO:0005654(nucleoplasm);GO:0005730(nucleolus);GO:0005737(cytoplasm);GO:0005925(focal adhesion);GO:0006281(DNA repair);GO:0006334(nucleosome assembly);GO:0006913(nucleocytoplasmic transport);GO:0007098(centrosome cycle);GO:0007569(cell aging);GO:0008104(protein localization);GO:0008284(positive regulation …	NA	NA	NA	PREDICTED: Capra hircus nucleophosmin (NPM1), transcript variant X3, mRNA;PREDICTED: Capra hircus nucleophosmin (NPM1), transcript variant X1, mRNA;PREDICTED: Capra hircus nucleophosmin (NPM1), transcript variant X2, mRNA;PREDICTED: Capra hircus nucleophosmin (NPM1), transcript variant X4, mRNA	60.9289	58.2778	56.481	47.7913	68.176	58.331
MSTRG.1138	chrNC_030810.1	17438374	17472481	-	LOC102183480;SLC2A1	XM_018046485.1;XR_001917157.1;MSTRG.1138.4;MSTRG.1138.5;MSTRG.1138.3;NM_001314223.1;MSTRG.1138.7	GO:0005163(nerve growth factor receptor binding);GO:0005515(protein binding);GO:0005634(nucleus);GO:0005829(cytosol);GO:0006919(activation of cysteine-type endopeptidase activity involved in apoptotic process);GO:0007275(multicellular organism development);GO:0008625(extrinsic apoptotic signaling pathway via death domain receptors);GO:0008656(cysteine-type endopeptidase activator activity involve…	04722(Neurotrophin signaling pathway);04066(HIF-1 signaling pathway);04911(Insulin secretion);04922(Glucagon signaling pathway);04920(Adipocytokine signaling pathway);04919(Thyroid hormone signaling pathway);04976(Bile secretion);05200(Pathways in cancer);05230(Central carbon metabolism in cancer);05211(Renal cell carcinoma);04931(Insulin resistance);05166(HTLV-I infection);05166(HTLV-I infection)	K12465;K07299	NA	PREDICTED: Capra hircus protein BEX3-like (LOC102183480), mRNA;PREDICTED: Capra hircus solute carrier family 2 member 1 (SLC2A1), transcript variant X1, misc_RNA;Capra hircus solute carrier family 2 member 1 (SLC2A1), mRNA	50.8359	64.3762	63.3416	55.6645	57.3592	58.3155
MSTRG.4514	chrNC_030817.1	1341698	1353815	-	PSMC1	MSTRG.4514.2;MSTRG.4514.1;XM_018053846.1	GO:0005524(ATP binding);GO:0005654(nucleoplasm);GO:0008540(proteasome regulatory particle, base subcomplex);GO:0016020(membrane);GO:0017025(TBP-class protein binding);GO:0030433(ER-associated ubiquitin-dependent protein catabolic process);GO:0031595(nuclear proteasome complex);GO:0031597(cytosolic proteasome complex);GO:0036402(proteasome-activating ATPase activity);GO:0044822(poly(A) RNA binding…	03050(Proteasome);05203(Viral carcinogenesis);05169(Epstein-Barr virus infection)	K03062	NA	PREDICTED: Capra hircus proteasome 26S subunit, ATPase 1 (PSMC1), mRNA	57.1081	53.7808	52.5179	64.4937	63.2978	58.2397
MSTRG.2275	chrNC_030812.1	30209388	30219666	-	TUBA1C	XM_018047844.1	GO:0003924(GTPase activity);GO:0005200(structural constituent of cytoskeleton);GO:0005525(GTP binding);GO:0005737(cytoplasm);GO:0005874(microtubule);GO:0007017(microtubule-based process)	04145(Phagosome);04210(Apoptosis);04540(Gap junction)	K07374	NA	PREDICTED: Capra hircus tubulin alpha 1c (TUBA1C), mRNA	72.0903	64.4642	77.9311	36.6578	39.5649	58.1417
MSTRG.10978	chrNC_030832.1	7567320	7580497	-	CARHSP1	XM_005697495.2;MSTRG.10978.2	GO:0000177(cytoplasmic exosome (RNase complex));GO:0003677(DNA binding);GO:0003730(mRNA 3'-UTR binding);GO:0005829(cytosol);GO:0006355(regulation of transcription, DNA-templated);GO:0043186(P granule);GO:0043488(regulation of mRNA stability);GO:0070062(extracellular exosome)	NA	NA	NA	PREDICTED: Capra hircus calcium regulated heat stable protein 1 (CARHSP1), mRNA	53.571	53.2579	53.5007	65.7244	64.166	58.044
MSTRG.6265	chrNC_030820.1	74068980	74098467	+	DNTTIP1;UBE2C	XM_018057930.1;XM_018057931.1;MSTRG.6265.1;MSTRG.6265.4;XM_018057933.1	GO:0000118(histone deacetylase complex);GO:0003677(DNA binding);GO:0005634(nucleus);GO:0005730(nucleolus);GO:0031491(nucleosome binding);GO:0042803(protein homodimerization activity);GO:0000209(protein polyubiquitination);GO:0004842(ubiquitin-protein transferase activity);GO:0005524(ATP binding);GO:0005680(anaphase-promoting complex);GO:0005737(cytoplasm);GO:0006511(ubiquitin-dependent protein ca…	04120(Ubiquitin mediated proteolysis)	K06688	EC:2.3.2.23	PREDICTED: Capra hircus deoxynucleotidyltransferase terminal interacting protein 1 (DNTTIP1), transcript variant X1, mRNA;PREDICTED: Capra hircus deoxynucleotidyltransferase terminal interacting protein 1 (DNTTIP1), transcript variant X2, mRNA;PREDICTED: Capra hircus ubiquitin conjugating enzyme E2 C (UBE2C), mRNA	53.4832	60.4892	67.74	46.567	61.6238	57.9806
MSTRG.1446	chrNC_030810.1	88746527	88762125	+	ATP5F1	XM_005677897.3	GO:0000276(mitochondrial proton-transporting ATP synthase complex, coupling factor F(o));GO:0005654(nucleoplasm);GO:0005753(mitochondrial proton-transporting ATP synthase complex);GO:0015986(ATP synthesis coupled proton transport);GO:0016887(ATPase activity);GO:0021762(substantia nigra development);GO:0043209(myelin sheath);GO:0046933(proton-transporting ATP synthase activity, rotational mechanis…	00190(Oxidative phosphorylation);05010(Alzheimer's disease);05012(Parkinson's disease);05016(Huntington's disease)	K02127	NA	PREDICTED: Capra hircus ATP synthase, H+ transporting, mitochondrial Fo complex subunit B1 (ATP5F1), mRNA	61.3079	63.8945	62.347	46.1609	55.5724	57.8565
MSTRG.8737	chrNC_030826.1	26224448	26255807	+	CAMTA2;SPAG7;PFN1	XM_018064488.1;XM_018064485.1;XM_018064486.1;XM_018064487.1;XM_018064490.1;XM_018064491.1;XM_018064492.1;MSTRG.8737.8;XM_005693453.3;MSTRG.8737.10;MSTRG.8737.11;MSTRG.8737.12;MSTRG.8737.13;MSTRG.8737.14;MSTRG.8737.15;MSTRG.8737.16;XM_018064540.1	GO:0001077(transcriptional activator activity, RNA polymerase II core promoter proximal region sequence-specific binding);GO:0003682(chromatin binding);GO:0005634(nucleus);GO:0006366(transcription from RNA polymerase II promoter);GO:0008134(transcription factor binding);GO:0014898(cardiac muscle hypertrophy in response to stress);GO:0042826(histone deacetylase binding);GO:0043565(sequence-specifi…	04015(Rap1 signaling pathway);04810(Regulation of actin cytoskeleton);05132(Salmonella infection)	K05759	NA	PREDICTED: Capra hircus calmodulin binding transcription activator 2 (CAMTA2), transcript variant X4, mRNA;PREDICTED: Capra hircus calmodulin binding transcription activator 2 (CAMTA2), transcript variant X1, mRNA;PREDICTED: Capra hircus calmodulin binding transcription activator 2 (CAMTA2), transcript variant X2, mRNA;PREDICTED: Capra hircus calmodulin binding transcription activator 2 (CAMTA2),…	64.7993	56.0652	55.7586	47.5651	65.0566	57.849
MSTRG.749	chrNC_030809.1	28642685	28650587	+	ABCB6	MSTRG.749.1;XM_005676573.3;MSTRG.749.3	GO:0005524(ATP binding);GO:0005743(mitochondrial inner membrane);GO:0005768(endosome);GO:0005783(endoplasmic reticulum);GO:0005794(Golgi apparatus);GO:0005886(plasma membrane);GO:0006779(porphyrin-containing compound biosynthetic process);GO:0006879(cellular iron ion homeostasis);GO:0007420(brain development);GO:0015439(heme-transporting ATPase activity);GO:0015562(efflux transmembrane transporte…	02010(ABC transporters)	K05661	NA	PREDICTED: Capra hircus ATP binding cassette subfamily B member 6 (Langereis blood group) (ABCB6), mRNA	46.9186	51.6019	56.2052	72.182	61.7279	57.7271
MSTRG.6971	chrNC_030823.1	65388	66921	+	LOC102186417	XR_001296604.2	GO:0000978(RNA polymerase II core promoter proximal region sequence-specific DNA binding);GO:0001077(transcriptional activator activity, RNA polymerase II core promoter proximal region sequence-specific binding);GO:0005689(U12-type spliceosomal complex);GO:0006366(transcription from RNA polymerase II promoter);GO:0010494(cytoplasmic stress granule);GO:0031965(nuclear membrane);GO:0044822(poly(A) …	04530(Tight junction)	K06099	NA	PREDICTED: Capra hircus nuclease-sensitive element-binding protein 1 pseudogene (LOC102186417), misc_RNA	55.8028	61.2185	57.9927	54.8071	58.6833	57.7009
MSTRG.10230	chrNC_030829.1	60149958	60174696	-	ALDH1L1	XM_018066948.1;XM_018066949.1;MSTRG.10230.1;MSTRG.10230.5;MSTRG.10230.4;MSTRG.10230.6	GO:0005739(mitochondrion);GO:0006730(one-carbon metabolic process);GO:0009058(biosynthetic process);GO:0009258(10-formyltetrahydrofolate catabolic process);GO:0016155(formyltetrahydrofolate dehydrogenase activity);GO:0016742(hydroxymethyl-, formyl- and related transferase activity);GO:0019145(aminobutyraldehyde dehydrogenase activity);GO:0047105(4-trimethylammoniobutyraldehyde dehydrogenase activ…	00670(One carbon pool by folate);00670(One carbon pool by folate)	K00289	EC:1.5.1.6	PREDICTED: Capra hircus aldehyde dehydrogenase 1 family member L1 (ALDH1L1), transcript variant X1, mRNA;PREDICTED: Capra hircus aldehyde dehydrogenase 1 family member L1 (ALDH1L1), transcript variant X2, mRNA	62.6745	61.9813	59.3409	62.1027	42.3229	57.6845
MSTRG.11680	chrNC_030834.1	16354420	16361243	+	DUSP26	MSTRG.11680.1;XM_018042128.1;MSTRG.11680.3;XM_018042127.1	GO:0000122(negative regulation of transcription from RNA polymerase II promoter);GO:0001102(RNA polymerase II activating transcription factor binding);GO:0002039(p53 binding);GO:0004647(phosphoserine phosphatase activity);GO:0004725(protein tyrosine phosphatase activity);GO:0005634(nucleus);GO:0005739(mitochondrion);GO:0005794(Golgi apparatus);GO:0008138(protein tyrosine/serine/threonine phosphat…	04010(MAPK signaling pathway);04010(MAPK signaling pathway)	K17614	EC:3.1.3.16;EC:3.1.3.48	PREDICTED: Capra hircus dual specificity phosphatase 26 (putative) (DUSP26), transcript variant X2, mRNA;PREDICTED: Capra hircus dual specificity phosphatase 26 (putative) (DUSP26), transcript variant X1, mRNA	47.0082	55.3896	102.633	31.9706	51.2173	57.6438
MSTRG.3527	chrNC_030814.1	89278872	89282376	+	OAZ1	NM_001285559.1;MSTRG.3527.2;MSTRG.3527.3	GO:0005829(cytosol);GO:0006595(polyamine metabolic process);GO:0008073(ornithine decarboxylase inhibitor activity);GO:0043086(negative regulation of catalytic activity)	NA	NA	NA	Capra hircus ornithine decarboxylase antizyme 1 (OAZ1), mRNA	69.2634	57.8043	69.643	36.8069	53.902	57.4839
MSTRG.11278	chrNC_030832.1	36781993	36787231	-	GNB2	MSTRG.11278.1;XR_001917241.1	GO:0007165(signal transduction)	04014(Ras signaling pathway);04151(PI3K-Akt signaling pathway);04062(Chemokine signaling pathway);04724(Glutamatergic synapse);04727(GABAergic synapse);04725(Cholinergic synapse);04728(Dopaminergic synapse);04726(Serotonergic synapse);04723(Retrograde endocannabinoid signaling);04713(Circadian entrainment);05200(Pathways in cancer);05032(Morphine addiction);05034(Alcoholism)	K04537	NA	PREDICTED: Capra hircus G protein subunit beta 2 (GNB2), ncRNA	69.7947	56.4599	69.0152	42.6831	48.1144	57.2135
MSTRG.5991	chrNC_030820.1	43309644	43310476	+	LOC102188953	XM_005688140.3	GO:0003723(RNA binding);GO:0005737(cytoplasm)	03013(RNA transport);04141(Protein processing in endoplasmic reticulum)	K14004	NA	PREDICTED: Capra hircus malignant T-cell-amplified sequence 1 (LOC102188953), mRNA	46.9204	50.8438	56.5773	68.6087	62.9154	57.1731
MSTRG.11806	chrNC_030835.1	10141382	10191318	+	MAT1A;LOC102175746	MSTRG.11806.1;MSTRG.11806.2;MSTRG.11806.3;MSTRG.11806.4;MSTRG.11806.5;XM_005699270.3;MSTRG.11806.6;MSTRG.11806.8;MSTRG.11806.9;MSTRG.11806.10;MSTRG.11806.11;MSTRG.11806.12;XM_018042467.1;XM_018042468.1	GO:0004478(methionine adenosyltransferase activity);GO:0005524(ATP binding);GO:0006556(S-adenosylmethionine biosynthetic process);GO:0006730(one-carbon metabolic process);GO:0046872(metal ion binding);GO:0005578(proteinaceous extracellular matrix);GO:0005581(collagen trimer);GO:0005615(extracellular space);GO:0007585(respiratory gaseous exchange);GO:0030246(carbohydrate binding);GO:0046872(metal …	01230(Biosynthesis of amino acids);00270(Cysteine and methionine metabolism);04145(Phagosome);05133(Pertussis);05133(Pertussis)	K00789;K10067	EC:2.5.1.6	PREDICTED: Capra hircus methionine adenosyltransferase 1A (MAT1A), mRNA;PREDICTED: Capra hircus pulmonary surfactant-associated protein A (LOC102175746), transcript variant X1, mRNA;PREDICTED: Capra hircus pulmonary surfactant-associated protein A (LOC102175746), transcript variant X2, mRNA	74.563	69.8644	35.1383	46.7451	59.3935	57.1409
MSTRG.605	chrNC_030809.1	8725901	8738373	-	PAQR7	MSTRG.605.3;MSTRG.605.4;MSTRG.605.5;XM_018056158.1;XM_018056167.1;MSTRG.605.2;MSTRG.605.1;XR_001918892.1	GO:0003707(steroid hormone receptor activity);GO:0005496(steroid binding);GO:0005886(plasma membrane);GO:0016021(integral component of membrane);GO:0043401(steroid hormone mediated signaling pathway);GO:0048545(response to steroid hormone);GO:0048545(response to steroid hormone)	NA	NA	NA	PREDICTED: Capra hircus progestin and adipoQ receptor family member 7 (PAQR7), transcript variant X1, mRNA;PREDICTED: Capra hircus progestin and adipoQ receptor family member 7 (PAQR7), transcript variant X2, mRNA;PREDICTED: Capra hircus progestin and adipoQ receptor family member 7 (PAQR7), transcript variant X3, misc_RNA	41.6011	70.5406	54.2833	88.8911	29.0367	56.8706
MSTRG.11014	chrNC_030832.1	13588565	13603504	+	NTAN1	XM_018040592.1;XM_018040593.1;MSTRG.11014.3;XM_018040594.1	GO:0005634(nucleus);GO:0005737(cytoplasm);GO:0007613(memory);GO:0008344(adult locomotory behavior);GO:0008418(protein-N-terminal asparagine amidohydrolase activity);GO:0008418(protein-N-terminal asparagine amidohydrolase activity)	NA	NA	NA	PREDICTED: Capra hircus N-terminal asparagine amidase (NTAN1), transcript variant X1, mRNA;PREDICTED: Capra hircus N-terminal asparagine amidase (NTAN1), transcript variant X2, mRNA;PREDICTED: Capra hircus N-terminal asparagine amidase (NTAN1), transcript variant X3, mRNA	81.5325	57.4442	56.8023	46.6319	41.8227	56.8467
MSTRG.3745	chrNC_030814.1	97981525	97984024	+	GADD45GIP1	XM_013965099.2	GO:0005634(nucleus);GO:0005759(mitochondrial matrix);GO:0005761(mitochondrial ribosome);GO:0008284(positive regulation of cell proliferation);GO:0070124(mitochondrial translational initiation);GO:0070125(mitochondrial translational elongation);GO:0071850(mitotic cell cycle arrest)	NA	NA	NA	PREDICTED: Capra hircus GADD45G interacting protein 1 (GADD45GIP1), mRNA	47.9423	47.5746	49.5675	65.1057	73.1917	56.6764
MSTRG.12500	chrNW_017189517.1	7645943	7682272	-	F9	MSTRG.12500.1;XM_005700431.3;MSTRG.12500.3	GO:0000287(magnesium ion binding);GO:0004175(endopeptidase activity);GO:0004252(serine-type endopeptidase activity);GO:0005509(calcium ion binding);GO:0005615(extracellular space);GO:0006508(proteolysis);GO:0007596(blood coagulation);GO:0031638(zymogen activation);GO:0070062(extracellular exosome)	04610(Complement and coagulation cascades)	K01321	EC:3.4.21.22	PREDICTED: Capra hircus coagulation factor IX (F9), mRNA	60.9651	64.172	63.6648	45.6454	47.8387	56.4572
MSTRG.2427	chrNC_030812.1	56901902	56905728	-	BLOC1S1	XM_018048122.1	GO:0005739(mitochondrion);GO:0005758(mitochondrial intermembrane space);GO:0005759(mitochondrial matrix);GO:0005829(cytosol);GO:0008089(anterograde axonal transport);GO:0009060(aerobic respiration);GO:0016197(endosomal transport);GO:0018394(peptidyl-lysine acetylation);GO:0031083(BLOC-1 complex);GO:0031175(neuron projection development);GO:0048490(anterograde synaptic vesicle transport)	NA	NA	NA	PREDICTED: Capra hircus biogenesis of lysosomal organelles complex 1 subunit 1 (BLOC1S1), mRNA	56.5811	56.2831	51.6105	60.3762	57.1536	56.4009
MSTRG.8038	chrNC_030825.1	47304024	47305483	+	PSENEN	XM_005692292.3;XM_005692291.3;XM_013971228.2	GO:0005789(endoplasmic reticulum membrane);GO:0005794(Golgi apparatus);GO:0007219(Notch signaling pathway);GO:0007220(Notch receptor processing);GO:0016021(integral component of membrane);GO:0070765(gamma-secretase complex);GO:0070765(gamma-secretase complex)	04330(Notch signaling pathway);05010(Alzheimer's disease);05010(Alzheimer's disease)	K06170	NA	PREDICTED: Capra hircus presenilin enhancer gamma-secretase subunit (PSENEN), transcript variant X3, mRNA;PREDICTED: Capra hircus presenilin enhancer gamma-secretase subunit (PSENEN), transcript variant X1, mRNA;PREDICTED: Capra hircus presenilin enhancer gamma-secretase subunit (PSENEN), transcript variant X2, mRNA	58.3667	58.4095	58.0518	46.0543	60.9908	56.3746
MSTRG.7387	chrNC_030824.1	823474	833230	-	YWHAH	MSTRG.7387.1;XM_018060921.1	GO:0005737(cytoplasm);GO:0019904(protein domain specific binding)	04390(Hippo signaling pathway);04151(PI3K-Akt signaling pathway);04110(Cell cycle);04114(Oocyte meiosis);05203(Viral carcinogenesis);05169(Epstein-Barr virus infection)	K16198	NA	PREDICTED: Capra hircus tyrosine 3-monooxygenase/tryptophan 5-monooxygenase activation protein eta (YWHAH), mRNA	55.5605	57.8631	62.7742	54.388	51.2842	56.374
MSTRG.7500	chrNC_030824.1	8792817	8817830	+	ALDH2	XM_005691559.3;MSTRG.7500.2;MSTRG.7500.3	GO:0004029(aldehyde dehydrogenase (NAD) activity);GO:0005759(mitochondrial matrix);GO:0006068(ethanol catabolic process);GO:0055114(oxidation-reduction process)	00010(Glycolysis / Gluconeogenesis);00040(Pentose and glucuronate interconversions);00053(Ascorbate and aldarate metabolism);00620(Pyruvate metabolism);00071(Fatty acid degradation);00561(Glycerolipid metabolism);00280(Valine, leucine and isoleucine degradation);00310(Lysine degradation);00330(Arginine and proline metabolism);00340(Histidine metabolism);00380(Tryptophan metabolism);00410(beta-Ala…	K00128	EC:1.2.1.3	PREDICTED: Capra hircus aldehyde dehydrogenase 2 family (mitochondrial) (ALDH2), mRNA	62.087	58.9628	65.3543	55.4093	39.4514	56.253
MSTRG.2370	chrNC_030812.1	55410664	55411335	-	LOC108636012	XM_018048046.1	GO:0000786(nucleosome);GO:0003677(DNA binding);GO:0005700(polytene chromosome);GO:0006333(chromatin assembly or disassembly);GO:0007140(male meiosis);GO:0007155(cell adhesion);GO:0008360(regulation of cell shape);GO:0046982(protein heterodimerization activity)	05202(Transcriptional misregulation in cancers);05322(Systemic lupus erythematosus);05034(Alcoholism)	K11253	NA	PREDICTED: Capra hircus histone H3.3-like (LOC108636012), mRNA	61.863	62.4801	73.6278	33.5367	49.1045	56.1224
MSTRG.5849	chrNC_030819.1	74918548	74933308	-	RGCC	XM_018056796.1	GO:0001100(negative regulation of exit from mitosis);GO:0001937(negative regulation of endothelial cell proliferation);GO:0003331(positive regulation of extracellular matrix constituent secretion);GO:0005634(nucleus);GO:0005737(cytoplasm);GO:0005813(centrosome);GO:0006956(complement activation);GO:0010718(positive regulation of epithelial to mesenchymal transition);GO:0016525(negative regulation …	NA	NA	NA	PREDICTED: Capra hircus regulator of cell cycle (RGCC), mRNA	58.4899	62.6794	66.7864	35.6887	56.9214	56.1132
MSTRG.10814	chrNC_030831.1	56990704	57026954	-	FECH	MSTRG.10814.2;MSTRG.10814.1;XM_018039721.1;MSTRG.10814.4	GO:0004325(ferrochelatase activity);GO:0005739(mitochondrion);GO:0005743(mitochondrial inner membrane);GO:0006783(heme biosynthetic process);GO:0046501(protoporphyrinogen IX metabolic process);GO:0046872(metal ion binding);GO:0051537(2 iron, 2 sulfur cluster binding)	00860(Porphyrin and chlorophyll metabolism)	K01772	EC:4.99.1.1	PREDICTED: Capra hircus ferrochelatase (FECH), mRNA	23.1453	86.4811	90.1045	35.9853	44.2976	56.0027
MSTRG.7212	chrNC_030823.1	49637605	49645776	+	CCNL2	XM_018060528.1;MSTRG.7212.1;XM_018060526.1;MSTRG.7212.4;XM_018060527.1	GO:0000307(cyclin-dependent protein kinase holoenzyme complex);GO:0005634(nucleus);GO:0005654(nucleoplasm);GO:0016538(cyclin-dependent protein serine/threonine kinase regulator activity);GO:0019901(protein kinase binding);GO:0045737(positive regulation of cyclin-dependent protein serine/threonine kinase activity);GO:0045944(positive regulation of transcription from RNA polymerase II promoter);GO:…	05202(Transcriptional misregulation in cancers);05202(Transcriptional misregulation in cancers)	K15188	NA	PREDICTED: Capra hircus cyclin L2 (CCNL2), transcript variant X3, mRNA;PREDICTED: Capra hircus cyclin L2 (CCNL2), transcript variant X1, mRNA;PREDICTED: Capra hircus cyclin L2 (CCNL2), transcript variant X2, mRNA	41.7843	46.3209	46.0195	91.7765	54.0423	55.9887
MSTRG.1472	chrNC_030810.1	93327087	93356301	+	MAB21L3	XM_013962504.2;XM_013962508.2;XM_005677821.3;XM_005677822.3;XM_013962505.2;XM_013962510.2	GO:0005515(protein binding);GO:0005515(protein binding)	NA	NA	NA	PREDICTED: Capra hircus mab-21 like 3 (MAB21L3), transcript variant X2, mRNA;PREDICTED: Capra hircus mab-21 like 3 (MAB21L3), transcript variant X5, mRNA;PREDICTED: Capra hircus mab-21 like 3 (MAB21L3), transcript variant X1, mRNA;PREDICTED: Capra hircus mab-21 like 3 (MAB21L3), transcript variant X4, mRNA;PREDICTED: Capra hircus mab-21 like 3 (MAB21L3), transcript variant X3, mRNA;PREDICTED: Cap…	59.3952	49.3194	58.2454	68.145	44.7333	55.9677
MSTRG.8484	chrNC_030825.1	67197851	67200858	-	CHMP2A	MSTRG.8484.1;XM_018063554.1	GO:0000920(cell separation after cytokinesis);GO:0005829(cytosol);GO:0006997(nucleus organization);GO:0007034(vacuolar transport);GO:0007080(mitotic metaphase plate congression);GO:0010324(membrane invagination);GO:0019904(protein domain specific binding);GO:0030117(membrane coat);GO:0031210(phosphatidylcholine binding);GO:0039702(viral budding via host ESCRT complex);GO:0045184(establishment of …	04144(Endocytosis)	K12191	NA	PREDICTED: Capra hircus charged multivesicular body protein 2A (CHMP2A), mRNA	52.5536	59.1604	58.2795	55.0975	54.3536	55.8889
MSTRG.3314	chrNC_030814.1	58705364	58718109	-	IK	MSTRG.3314.1;XM_005683045.2	GO:0005634(nucleus)	NA	NA	NA	PREDICTED: Capra hircus IK cytokine, down-regulator of HLA II (IK), mRNA	50.3785	56.0264	55.6316	59.8436	57.5145	55.8789
MSTRG.3729	chrNC_030814.1	97001715	97004976	+	SAMD1	XM_018051194.1;MSTRG.3729.2	GO:0003674(molecular_function);GO:0005575(cellular_component);GO:0005576(extracellular region);GO:0005737(cytoplasm);GO:0008150(biological_process)	04141(Protein processing in endoplasmic reticulum);04010(MAPK signaling pathway);04012(ErbB signaling pathway);04620(Toll-like receptor signaling pathway);04912(GnRH signaling pathway);05164(Influenza A)	K04431	EC:2.7.12.2	PREDICTED: Capra hircus sterile alpha motif domain containing 1 (SAMD1), mRNA	52.2872	59.1337	56.1491	60.59	51.045	55.841
MSTRG.12801	chrNW_017189851.1	331938	336435	+	MRPL40	MSTRG.12801.1;XM_018044816.1	GO:0005730(nucleolus);GO:0005761(mitochondrial ribosome);GO:0044822(poly(A) RNA binding)	NA	NA	NA	PREDICTED: Capra hircus mitochondrial ribosomal protein L40 (MRPL40), mRNA	42.9747	44.3175	39.792	79.1688	71.4425	55.5391
MSTRG.6626	chrNC_030822.1	5731628	5737570	+	PSMC3	XM_013969885.2;MSTRG.6626.2	GO:0000932(cytoplasmic mRNA processing body);GO:0001824(blastocyst development);GO:0005524(ATP binding);GO:0008540(proteasome regulatory particle, base subcomplex);GO:0016020(membrane);GO:0017025(TBP-class protein binding);GO:0030433(ER-associated ubiquitin-dependent protein catabolic process);GO:0031595(nuclear proteasome complex);GO:0031597(cytosolic proteasome complex);GO:0036402(proteasome-ac…	03050(Proteasome);05169(Epstein-Barr virus infection)	K03065	NA	PREDICTED: Capra hircus proteasome 26S subunit, ATPase 3 (PSMC3), mRNA	56.1732	59.5675	61.4915	44.0503	56.3451	55.5255
MSTRG.2408	chrNC_030812.1	56467918	56479393	-	SLC39A5;NABP2	MSTRG.2408.2;XM_018048083.1;MSTRG.2408.1;XM_018048084.1;XM_018048082.1;MSTRG.2408.3;XM_018048090.1;XM_018048091.1;XM_018048089.1;XM_005709487.3	GO:0001654(eye development);GO:0005385(zinc ion transmembrane transporter activity);GO:0005886(plasma membrane);GO:0005887(integral component of plasma membrane);GO:0006810(transport);GO:0006811(ion transport);GO:0006829(zinc II ion transport);GO:0006882(cellular zinc ion homeostasis);GO:0016020(membrane);GO:0016021(integral component of membrane);GO:0016323(basolateral plasma membrane);GO:003000…	04978(Mineral absorption);04978(Mineral absorption)	K14710	NA	PREDICTED: Capra hircus solute carrier family 39 member 5 (SLC39A5), transcript variant X2, mRNA;PREDICTED: Capra hircus solute carrier family 39 member 5 (SLC39A5), transcript variant X3, mRNA;PREDICTED: Capra hircus solute carrier family 39 member 5 (SLC39A5), transcript variant X1, mRNA;PREDICTED: Capra hircus nucleic acid binding protein 2 (NABP2), transcript variant X3, mRNA;PREDICTED: Capra…	63.3921	49.5751	52.4262	57.3247	54.6254	55.4687
MSTRG.2636	chrNC_030812.1	102522453	102524976	+	CDCA3	XM_005680938.2	GO:0051301(cell division)	NA	NA	NA	PREDICTED: Capra hircus cell division cycle associated 3 (CDCA3), mRNA	54.9498	53.5549	66.9945	42.4732	58.663	55.3271
MSTRG.11026	chrNC_030832.1	16285924	16293409	-	ARL6IP1	XM_005697528.3;MSTRG.11026.2;MSTRG.11026.3	GO:0005784(Sec61 translocon complex);GO:0005829(cytosol);GO:0006613(cotranslational protein targeting to membrane);GO:0016021(integral component of membrane)	NA	NA	NA	PREDICTED: Capra hircus ADP ribosylation factor like GTPase 6 interacting protein 1 (ARL6IP1), mRNA	57.9686	57.7818	57.9775	49.7026	52.8457	55.2552
MSTRG.8027	chrNC_030825.1	46809107	46819255	+	USF2	MSTRG.8027.1;MSTRG.8027.2;MSTRG.8027.3;XM_018063373.1;XM_018063375.1;MSTRG.8027.6;XM_018063374.1	GO:0000432(positive regulation of transcription from RNA polymerase II promoter by glucose);GO:0003705(transcription factor activity, RNA polymerase II distal enhancer sequence-specific binding);GO:0005654(nucleoplasm);GO:0006366(transcription from RNA polymerase II promoter);GO:0007595(lactation);GO:0042803(protein homodimerization activity);GO:0043425(bHLH transcription factor binding);GO:00435…	04514(Cell adhesion molecules (CAMs));04530(Tight junction);04530(Tight junction)	K06089	NA	PREDICTED: Capra hircus upstream transcription factor 2, c-fos interacting (USF2), transcript variant X1, mRNA;PREDICTED: Capra hircus upstream transcription factor 2, c-fos interacting (USF2), transcript variant X3, mRNA;PREDICTED: Capra hircus upstream transcription factor 2, c-fos interacting (USF2), transcript variant X2, mRNA	44.1388	52.606	51.4894	81.1225	46.1603	55.1034
MSTRG.4096	chrNC_030815.1	70482484	70528638	+	SLC25A37	XM_018052336.1;MSTRG.4096.2;MSTRG.4096.3;MSTRG.4096.4;MSTRG.4096.5;MSTRG.4096.6;XM_018052338.1;XM_018052337.1;MSTRG.4096.9;XM_018052340.1;XM_018052341.1	GO:0005381(iron ion transmembrane transporter activity);GO:0005743(mitochondrial inner membrane);GO:0016021(integral component of membrane);GO:0034755(iron ion transmembrane transport);GO:0048250(mitochondrial iron ion transport);GO:0048250(mitochondrial iron ion transport)	NA	NA	NA	PREDICTED: Capra hircus solute carrier family 25 member 37 (SLC25A37), transcript variant X1, mRNA;PREDICTED: Capra hircus solute carrier family 25 member 37 (SLC25A37), transcript variant X3, mRNA;PREDICTED: Capra hircus solute carrier family 25 member 37 (SLC25A37), transcript variant X2, mRNA;PREDICTED: Capra hircus solute carrier family 25 member 37 (SLC25A37), transcript variant X4, mRNA;PRE…	51.3153	39.8804	45.6062	42.1728	96.0438	55.0037
MSTRG.11096	chrNC_030832.1	26040615	26041453	+	BOLA2B	MSTRG.11096.1;MSTRG.11096.2;XM_005697661.3	GO:0070062(extracellular exosome)	04010(MAPK signaling pathway);04012(ErbB signaling pathway);04350(TGF-beta signaling pathway);04370(VEGF signaling pathway);04068(FoxO signaling pathway);04150(mTOR signaling pathway);04810(Regulation of actin cytoskeleton);04114(Oocyte meiosis);04510(Focal adhesion);04520(Adherens junction);04540(Gap junction);04620(Toll-like receptor signaling pathway);04621(NOD-like receptor signaling pathway)…	K04371	EC:2.7.11.24	PREDICTED: Capra hircus bolA family member 2B (BOLA2B), mRNA	59.2487	47.0694	47.1274	57.3615	63.9167	54.9448
MSTRG.12191	chrNC_030836.1	44174580	44190648	+	EHBP1L1	XR_001917462.1;MSTRG.12191.1;XM_018042846.1;XM_018042847.1;XM_018042848.1;XM_018042849.1;XM_018042851.1;XM_018042852.1;XM_018042853.1;XM_018042854.1;MSTRG.12191.4;XM_018042855.1;XM_018042856.1;XM_018042857.1;XM_018042858.1;XM_018042859.1;XM_018042860.1;XM_018042861.1;MSTRG.12191.22;MSTRG.12191.21;MSTRG.12191.19;MSTRG.12191.20;MSTRG.12191.23;MSTRG.12191.24;MSTRG.12191.25;MSTRG.12191.26;MSTRG.12191…	GO:0016020(membrane);GO:0016020(membrane)	04810(Regulation of actin cytoskeleton);04510(Focal adhesion);04520(Adherens junction);04530(Tight junction);04530(Tight junction)	K05699	NA	PREDICTED: Capra hircus EH domain binding protein 1 like 1 (EHBP1L1), transcript variant X7, misc_RNA;PREDICTED: Capra hircus EH domain binding protein 1 like 1 (EHBP1L1), transcript variant X1, mRNA;PREDICTED: Capra hircus EH domain binding protein 1 like 1 (EHBP1L1), transcript variant X2, mRNA;PREDICTED: Capra hircus EH domain binding protein 1 like 1 (EHBP1L1), transcript variant X3, mRNA;PRE…	49.756	46.0559	52.5258	70.3321	55.9589	54.9257
MSTRG.10160	chrNC_030829.1	53018832	53020774	-	CCRL2	MSTRG.10160.1;XM_005696034.3;XM_005696037.3;XM_018038470.1;XM_005696035.3;XM_005696036.3;XM_018038471.1	GO:0004950(chemokine receptor activity);GO:0005887(integral component of plasma membrane);GO:0006935(chemotaxis);GO:0006954(inflammatory response);GO:0007186(G-protein coupled receptor signaling pathway);GO:0048020(CCR chemokine receptor binding);GO:0070098(chemokine-mediated signaling pathway);GO:0070098(chemokine-mediated signaling pathway)	04060(Cytokine-cytokine receptor interaction);04062(Chemokine signaling pathway);04062(Chemokine signaling pathway)	K04176	NA	PREDICTED: Capra hircus C-C motif chemokine receptor like 2 (CCRL2), transcript variant X1, mRNA;PREDICTED: Capra hircus C-C motif chemokine receptor like 2 (CCRL2), transcript variant X5, mRNA;PREDICTED: Capra hircus C-C motif chemokine receptor like 2 (CCRL2), transcript variant X4, mRNA;PREDICTED: Capra hircus C-C motif chemokine receptor like 2 (CCRL2), transcript variant X3, mRNA;PREDICTED: …	45.4247	47.1118	60.7992	70.4564	49.6341	54.6853
MSTRG.3208	chrNC_030814.1	23255155	23256801	+	LOC102184427	XR_001918276.1	GO:0000166(nucleotide binding);GO:0000380(alternative mRNA splicing, via spliceosome);GO:0000381(regulation of alternative mRNA splicing, via spliceosome);GO:0006376(mRNA splice site selection);GO:0010837(regulation of keratinocyte proliferation);GO:0016607(nuclear speck);GO:0036002(pre-mRNA binding);GO:0044822(poly(A) RNA binding);GO:0045617(negative regulation of keratinocyte differentiation);G…	03040(Spliceosome);05168(Herpes simplex infection)	K12893	NA	PREDICTED: Capra hircus serine/arginine-rich splicing factor 6 pseudogene (LOC102184427), misc_RNA	49.7614	53.0796	51.1089	63.3707	55.1459	54.4933
MSTRG.8096	chrNC_030825.1	50245065	50291419	-	FBL	MSTRG.8096.1;XM_018062403.1	GO:0000494(box C/D snoRNA 3'-end processing);GO:0001094(TFIID-class transcription factor binding);GO:0001649(osteoblast differentiation);GO:0001652(granular component);GO:0003723(RNA binding);GO:0008033(tRNA processing);GO:0008649(rRNA methyltransferase activity);GO:0015030(Cajal body);GO:0016020(membrane);GO:0031167(rRNA methylation);GO:0031428(box C/D snoRNP complex);GO:0032040(small-subunit pr…	03008(Ribosome biogenesis in eukaryotes)	K14563	EC:2.1.1.-	PREDICTED: Capra hircus fibrillarin (FBL), mRNA	53.7462	51.6513	49.696	49.5361	67.4546	54.4168
MSTRG.1553	chrNC_030810.1	100780450	100782778	+	PSMB4	XR_001917869.1;MSTRG.1553.2;MSTRG.1553.3;XM_005677722.3	GO:0001530(lipopolysaccharide binding);GO:0002862(negative regulation of inflammatory response to antigenic stimulus);GO:0004298(threonine-type endopeptidase activity);GO:0005634(nucleus);GO:0005737(cytoplasm);GO:0005839(proteasome core complex);GO:0051603(proteolysis involved in cellular protein catabolic process);GO:0070062(extracellular exosome);GO:0070062(extracellular exosome)	03050(Proteasome);03050(Proteasome)	K02736	EC:3.4.25.1	PREDICTED: Capra hircus proteasome subunit beta 4 (PSMB4), transcript variant X1, misc_RNA;PREDICTED: Capra hircus proteasome subunit beta 4 (PSMB4), transcript variant X2, mRNA	59.5253	53.2708	51.5696	56.0424	51.4427	54.3702
MSTRG.3472	chrNC_030814.1	71844983	71850099	+	RAB24	XM_005682749.3;XR_001918320.1;XR_001918319.1;XR_001918321.1;MSTRG.3472.5;MSTRG.3472.6	GO:0005525(GTP binding);GO:0005739(mitochondrion);GO:0005776(autophagosome);GO:0007264(small GTPase mediated signal transduction);GO:0007264(small GTPase mediated signal transduction)	04144(Endocytosis);04145(Phagosome);04145(Phagosome)	K07887	NA	PREDICTED: Capra hircus RAB24, member RAS oncogene family (RAB24), transcript variant X1, mRNA;PREDICTED: Capra hircus RAB24, member RAS oncogene family (RAB24), transcript variant X3, misc_RNA;PREDICTED: Capra hircus RAB24, member RAS oncogene family (RAB24), transcript variant X2, misc_RNA;PREDICTED: Capra hircus RAB24, member RAS oncogene family (RAB24), transcript variant X4, misc_RNA	53.1958	51.1224	55.4255	63.1572	48.8608	54.3523
MSTRG.3082	chrNC_030813.1	97556866	97624118	-	HNRNPD	MSTRG.3082.1;MSTRG.3082.8;MSTRG.3082.7;MSTRG.3082.5;MSTRG.3082.2;MSTRG.3082.3;MSTRG.3082.6;XR_001918210.1;XR_001918209.1;XM_018049640.1;XM_018049641.1;XM_018049642.1;XM_018049644.1;MSTRG.3082.4	GO:0000166(nucleotide binding);GO:0005654(nucleoplasm);GO:0030529(intracellular ribonucleoprotein complex);GO:0042162(telomeric DNA binding);GO:0042752(regulation of circadian rhythm);GO:0043488(regulation of mRNA stability);GO:0044822(poly(A) RNA binding);GO:0045727(positive regulation of translation);GO:0070062(extracellular exosome);GO:0097167(circadian regulation of translation);GO:0003676(nu…	04320(Dorso-ventral axis formation);04320(Dorso-ventral axis formation)	K03102	NA	PREDICTED: Capra hircus heterogeneous nuclear ribonucleoprotein D (HNRNPD), transcript variant X5, misc_RNA;PREDICTED: Capra hircus heterogeneous nuclear ribonucleoprotein D (HNRNPD), transcript variant X2, misc_RNA;PREDICTED: Capra hircus heterogeneous nuclear ribonucleoprotein D (HNRNPD), transcript variant X1, mRNA;PREDICTED: Capra hircus heterogeneous nuclear ribonucleoprotein D (HNRNPD), tra…	53.2837	56.4359	53.3567	54.0391	54.3847	54.3
MSTRG.12807	chrNW_017189851.1	536277	551636	+	COMT	XM_018044803.1;MSTRG.12807.2	GO:0000287(magnesium ion binding);GO:0005737(cytoplasm);GO:0005886(plasma membrane);GO:0006584(catecholamine metabolic process);GO:0016021(integral component of membrane);GO:0016206(catechol O-methyltransferase activity);GO:0032259(methylation);GO:0042135(neurotransmitter catabolic process)	00140(Steroid hormone biosynthesis);00350(Tyrosine metabolism);04728(Dopaminergic synapse)	K00545	EC:2.1.1.6	PREDICTED: Capra hircus catechol-O-methyltransferase (COMT), mRNA	70.5913	59.8222	61.3123	31.9501	47.2772	54.1906
MSTRG.12699	chrNW_017189615.1	12700	14274	+	LOC102180659	XR_001917652.1	GO:0000049(tRNA binding);GO:0003746(translation elongation factor activity);GO:0003924(GTPase activity);GO:0005515(protein binding);GO:0005525(GTP binding);GO:0005615(extracellular space);GO:0005622(intracellular);GO:0005634(nucleus);GO:0005730(nucleolus);GO:0005737(cytoplasm);GO:0005829(cytosol);GO:0006414(translational elongation);GO:0019901(protein kinase binding);GO:0030864(cortical actin cyt…	03013(RNA transport);05134(Legionellosis)	K03231	NA	PREDICTED: Capra hircus elongation factor 1-alpha 1 pseudogene (LOC102180659), misc_RNA	70.0549	63.7823	57.2318	36.4264	43.3881	54.1767
MSTRG.8259	chrNC_030825.1	55903284	55929693	-	LIG1	MSTRG.8259.1;XM_018062687.1;XM_018062689.1;XM_018062685.1;XM_018062686.1;XR_001919535.1	GO:0003677(DNA binding);GO:0003910(DNA ligase (ATP) activity);GO:0005524(ATP binding);GO:0005634(nucleus);GO:0005654(nucleoplasm);GO:0005739(mitochondrion);GO:0005794(Golgi apparatus);GO:0006284(base-excision repair);GO:0006310(DNA recombination);GO:0051103(DNA ligation involved in DNA repair);GO:0071897(DNA biosynthetic process);GO:1903461(Okazaki fragment processing involved in mitotic DNA repl…	03030(DNA replication);03410(Base excision repair);03420(Nucleotide excision repair);03430(Mismatch repair);03430(Mismatch repair)	K10747	EC:6.5.1.1;EC:6.5.1.6	PREDICTED: Capra hircus DNA ligase 1 (LIG1), transcript variant X3, mRNA;PREDICTED: Capra hircus DNA ligase 1 (LIG1), transcript variant X4, mRNA;PREDICTED: Capra hircus DNA ligase 1 (LIG1), transcript variant X1, mRNA;PREDICTED: Capra hircus DNA ligase 1 (LIG1), transcript variant X2, mRNA;PREDICTED: Capra hircus DNA ligase 1 (LIG1), transcript variant X5, misc_RNA	54.0421	41.4971	53.8773	79.5502	41.5044	54.0942
MSTRG.12442	chrNW_017189516.1	41748308	41748532	.		MSTRG.12442.1	NA	NA	NA	NA		31.0511	47.6773	44.7645	80.3695	66.1425	54.001
MSTRG.6764	chrNC_030822.1	31688212	31691470	+	ANAPC15	XM_005689880.3;XM_005689885.3;XM_005689882.3;MSTRG.6764.4;XM_005689881.3;XM_005689883.3;MSTRG.6764.7;XM_018059412.1	GO:0005680(anaphase-promoting complex);GO:0090266(regulation of mitotic cell cycle spindle assembly checkpoint);GO:0003674(molecular_function);GO:0007049(cell cycle);GO:0007067(mitotic nuclear division);GO:0051301(cell division);GO:0051301(cell division)	NA	NA	NA	PREDICTED: Capra hircus anaphase promoting complex subunit 15 (ANAPC15), transcript variant X1, mRNA;PREDICTED: Capra hircus anaphase promoting complex subunit 15 (ANAPC15), transcript variant X5, mRNA;PREDICTED: Capra hircus anaphase promoting complex subunit 15 (ANAPC15), transcript variant X3, mRNA;PREDICTED: Capra hircus anaphase promoting complex subunit 15 (ANAPC15), transcript variant X2, …	46.3847	47.5483	55.3803	47.8291	71.9572	53.8199
MSTRG.4623	chrNC_030817.1	26106676	26234517	+	SPTB	XM_018054066.1;MSTRG.4623.3;MSTRG.4623.2;MSTRG.4623.4;MSTRG.4623.5;MSTRG.4623.6;MSTRG.4623.7;MSTRG.4623.8;MSTRG.4623.9	GO:0005200(structural constituent of cytoskeleton);GO:0005543(phospholipid binding);GO:0008091(spectrin);GO:0009986(cell surface);GO:0014731(spectrin-associated cytoskeleton);GO:0030506(ankyrin binding);GO:0043234(protein complex);GO:0051015(actin filament binding)	04530(Tight junction)	K06115	NA	PREDICTED: Capra hircus spectrin beta, erythrocytic (SPTB), mRNA	42.4588	45.6691	60.3044	60.0395	60.5597	53.8063
MSTRG.6927	chrNC_030822.1	59978128	59980505	+	TIMM8B	XM_005689448.3	GO:0005739(mitochondrion);GO:0015031(protein transport);GO:0046872(metal ion binding)	NA	NA	NA	PREDICTED: Capra hircus translocase of inner mitochondrial membrane 8 homolog B (TIMM8B), mRNA	53.1662	52.9552	54.5817	54.9391	53.2905	53.7865
MSTRG.10210	chrNC_030829.1	59012878	59071016	-	CNBP	MSTRG.10210.6;XM_018066900.1;MSTRG.10210.2;MSTRG.10210.3;MSTRG.10210.1;MSTRG.10210.5;XM_018066898.1;XM_018066901.1;MSTRG.10210.4;XM_018066899.1	GO:0003676(nucleic acid binding);GO:0008270(zinc ion binding);GO:0008270(zinc ion binding)	03018(RNA degradation);03018(RNA degradation)	K12597	NA	PREDICTED: Capra hircus CCHC-type zinc finger nucleic acid binding protein (CNBP), transcript variant X3, mRNA;PREDICTED: Capra hircus CCHC-type zinc finger nucleic acid binding protein (CNBP), transcript variant X1, mRNA;PREDICTED: Capra hircus CCHC-type zinc finger nucleic acid binding protein (CNBP), transcript variant X4, mRNA;PREDICTED: Capra hircus CCHC-type zinc finger nucleic acid binding…	42.6692	51.3601	51.9926	65.369	57.4891	53.776
MSTRG.7789	chrNC_030825.1	12167284	12211547	-	COTL1	XM_005691841.3	GO:0003779(actin binding);GO:0005634(nucleus);GO:0005737(cytoplasm);GO:0005856(cytoskeleton);GO:0019899(enzyme binding);GO:0050832(defense response to fungus);GO:0070062(extracellular exosome)	NA	NA	NA	PREDICTED: Capra hircus coactosin like F-actin binding protein 1 (COTL1), mRNA	71.7149	39.8316	60.432	33.4356	63.1048	53.7038
MSTRG.6002	chrNC_030820.1	45737808	45742197	+	LOC102191533	MSTRG.6002.1;XM_018057345.1	GO:0004452(isopentenyl-diphosphate delta-isomerase activity);GO:0008299(isoprenoid biosynthetic process);GO:0016787(hydrolase activity)	00900(Terpenoid backbone biosynthesis)	K01823	EC:5.3.3.2	PREDICTED: Capra hircus isopentenyl-diphosphate Delta-isomerase 1 (LOC102191533), mRNA	30.0496	48.4726	44.739	80.2197	64.8143	53.659
MSTRG.1709	chrNC_030810.1	111733616	111749927	-	PFDN2	MSTRG.1709.1;XM_005677179.3	GO:0005634(nucleus);GO:0005739(mitochondrion);GO:0005829(cytosol);GO:0006457(protein folding);GO:0016272(prefoldin complex);GO:0051082(unfolded protein binding);GO:0051086(chaperone mediated protein folding independent of cofactor)	NA	NA	NA	PREDICTED: Capra hircus prefoldin subunit 2 (PFDN2), mRNA	55.2141	50.0764	49.9706	50.5414	62.2041	53.6013
MSTRG.3528	chrNC_030814.1	89322318	89326916	-	LSM7	MSTRG.3528.1;XM_018050771.1;MSTRG.3528.3	GO:0000398(mRNA splicing, via spliceosome);GO:0003723(RNA binding);GO:0005688(U6 snRNP);GO:0005689(U12-type spliceosomal complex);GO:0005732(small nucleolar ribonucleoprotein complex);GO:0006396(RNA processing);GO:0071004(U2-type prespliceosome);GO:0071013(catalytic step 2 spliceosome);GO:0097526(spliceosomal tri-snRNP complex)	03040(Spliceosome);03018(RNA degradation)	K12626	NA	PREDICTED: Capra hircus LSM7 homolog, U6 small nuclear RNA and mRNA degradation associated (LSM7), mRNA	44.0309	54.7719	46.9386	54.5016	67.4282	53.5343
MSTRG.10221	chrNC_030829.1	59737958	59743102	-	ABTB1	XM_018067059.1;MSTRG.10221.2;MSTRG.10221.4;MSTRG.10221.3;MSTRG.10221.1	GO:0005730(nucleolus);GO:0005737(cytoplasm);GO:0005886(plasma membrane)	NA	NA	NA	PREDICTED: Capra hircus ankyrin repeat and BTB domain containing 1 (ABTB1), mRNA	43.9333	42.5335	58.1223	65.3035	57.6452	53.5076
MSTRG.10899	chrNC_030832.1	1265737	1271750	-	SPSB3	MSTRG.10899.1;MSTRG.10899.5;MSTRG.10899.3;MSTRG.10899.4;XM_018040065.1;MSTRG.10899.2;XM_018040063.1;XM_018040062.1;XM_018040064.1	GO:0005622(intracellular);GO:0035556(intracellular signal transduction);GO:0035556(intracellular signal transduction)	NA	NA	NA	PREDICTED: Capra hircus splA/ryanodine receptor domain and SOCS box containing 3 (SPSB3), transcript variant X4, mRNA;PREDICTED: Capra hircus splA/ryanodine receptor domain and SOCS box containing 3 (SPSB3), transcript variant X2, mRNA;PREDICTED: Capra hircus splA/ryanodine receptor domain and SOCS box containing 3 (SPSB3), transcript variant X1, mRNA;PREDICTED: Capra hircus splA/ryanodine recept…	51.4531	47.2017	47.8493	67.022	53.9144	53.4881
MSTRG.4945	chrNC_030817.1	80567352	80572819	-	CIDEB	XM_005685207.3;MSTRG.4945.3;MSTRG.4945.2;XM_018054644.1;XM_018054643.1	GO:0005811(lipid particle);GO:0005829(cytosol);GO:0042802(identical protein binding);GO:0042981(regulation of apoptotic process);GO:0048471(perinuclear region of cytoplasm);GO:0090200(positive regulation of release of cytochrome c from mitochondria);GO:0097194(execution phase of apoptosis);GO:0097202(activation of cysteine-type endopeptidase activity);GO:0097202(activation of cysteine-type endope…	NA	NA	NA	PREDICTED: Capra hircus cell death-inducing DFFA-like effector b (CIDEB), transcript variant X1, mRNA;PREDICTED: Capra hircus cell death-inducing DFFA-like effector b (CIDEB), transcript variant X3, mRNA;PREDICTED: Capra hircus cell death-inducing DFFA-like effector b (CIDEB), transcript variant X2, mRNA	56.117	62.6527	57.0386	45.4034	46.1212	53.4666
MSTRG.11103	chrNC_030832.1	26123037	26128766	-	ALDOA	XM_005697671.2;MSTRG.11103.2;XM_018039935.1;MSTRG.11103.1;XM_013974696.1;XM_005697674.3	GO:0004332(fructose-bisphosphate aldolase activity);GO:0005615(extracellular space);GO:0005634(nucleus);GO:0006000(fructose metabolic process);GO:0006096(glycolytic process);GO:0006754(ATP biosynthetic process);GO:0006941(striated muscle contraction);GO:0008092(cytoskeletal protein binding);GO:0008360(regulation of cell shape);GO:0015629(actin cytoskeleton);GO:0016020(membrane);GO:0030388(fructos…	01200(Carbon metabolism);01230(Biosynthesis of amino acids);00010(Glycolysis / Gluconeogenesis);00030(Pentose phosphate pathway);00051(Fructose and mannose metabolism);00051(Fructose and mannose metabolism)	K01623	EC:4.1.2.13	PREDICTED: Capra hircus aldolase, fructose-bisphosphate A (ALDOA), transcript variant X1, mRNA;PREDICTED: Capra hircus aldolase, fructose-bisphosphate A (ALDOA), transcript variant X3, mRNA;PREDICTED: Capra hircus aldolase, fructose-bisphosphate A (ALDOA), transcript variant X4, mRNA;PREDICTED: Capra hircus aldolase, fructose-bisphosphate A (ALDOA), transcript variant X2, mRNA	61.9849	40.5865	49.0178	54.3376	61.2954	53.4444
MSTRG.9228	chrNC_030826.1	55055928	55062873	+	GALK1	MSTRG.9228.1;XM_018063804.1;MSTRG.9228.3;MSTRG.9228.4	GO:0004335(galactokinase activity);GO:0005524(ATP binding);GO:0005737(cytoplasm);GO:0006012(galactose metabolic process);GO:0046835(carbohydrate phosphorylation)	00052(Galactose metabolism);00520(Amino sugar and nucleotide sugar metabolism)	K00849	EC:2.7.1.6	PREDICTED: Capra hircus galactokinase 1 (GALK1), mRNA	51.52	51.5352	49.9059	54.2762	59.7993	53.4073
MSTRG.7373	chrNC_030824.1	132729	136177	+	CHCHD10	XM_018061195.1	GO:0005739(mitochondrion)	00270(Cysteine and methionine metabolism);05206(MicroRNAs in cancer)	K00558	EC:2.1.1.37	PREDICTED: Capra hircus coiled-coil-helix-coiled-coil-helix domain containing 10 (CHCHD10), mRNA	45.7297	52.7626	49.1087	66.157	52.9385	53.3393
MSTRG.2754	chrNC_030812.1	111664258	111674978	-	SNU13	XM_005681119.3	GO:0000398(mRNA splicing, via spliceosome);GO:0000470(maturation of LSU-rRNA);GO:0003723(RNA binding);GO:0006412(translation);GO:0022625(cytosolic large ribosomal subunit);GO:0030490(maturation of SSU-rRNA);GO:0030621(U4 snRNA binding);GO:0030622(U4atac snRNA binding);GO:0031428(box C/D snoRNP complex);GO:0032040(small-subunit processome);GO:0034511(U3 snoRNA binding);GO:0034512(box C/D snoRNA bi…	03040(Spliceosome);03008(Ribosome biogenesis in eukaryotes)	K12845	NA	PREDICTED: Capra hircus SNU13 homolog, small nuclear ribonucleoprotein (U4/U6.U5) (SNU13), mRNA	58.2888	56.0062	48.9154	42.6533	60.4073	53.2542
MSTRG.8020	chrNC_030825.1	46689985	46695902	+	FXYD1	MSTRG.8020.1;XM_018063399.1;XM_005692325.3;XM_005692329.3;XM_018063397.1;XM_018063398.1;XM_018063394.1;XM_018063395.1;XM_018063396.1	GO:0005254(chloride channel activity);GO:0005887(integral component of plasma membrane);GO:0017080(sodium channel regulator activity);GO:0034707(chloride channel complex);GO:0042383(sarcolemma);GO:0086036(regulation of cardiac muscle cell membrane potential);GO:1902476(chloride transmembrane transport);GO:1903278(positive regulation of sodium ion export from cell);GO:2000649(regulation of sodium …	04024(cAMP signaling pathway);04024(cAMP signaling pathway)	K13360	NA	PREDICTED: Capra hircus FXYD domain containing ion transport regulator 1 (FXYD1), transcript variant X8, mRNA;PREDICTED: Capra hircus FXYD domain containing ion transport regulator 1 (FXYD1), transcript variant X1, mRNA;PREDICTED: Capra hircus FXYD domain containing ion transport regulator 1 (FXYD1), transcript variant X6, mRNA;PREDICTED: Capra hircus FXYD domain containing ion transport regulato…	52.0125	45.4457	48.7069	41.5298	77.7156	53.0821
MSTRG.7428	chrNC_030824.1	2678946	2705815	-	EWSR1	XM_018061027.1;XM_018061028.1;XM_018061030.1;MSTRG.7428.2;MSTRG.7428.7;XM_018061029.1;MSTRG.7428.8;MSTRG.7428.6	GO:0000166(nucleotide binding);GO:0003676(nucleic acid binding);GO:0003723(RNA binding);GO:0005515(protein binding);GO:0005516(calmodulin binding);GO:0005634(nucleus);GO:0005737(cytoplasm);GO:0005886(plasma membrane);GO:0006351(transcription, DNA-templated);GO:0006355(regulation of transcription, DNA-templated);GO:0008270(zinc ion binding);GO:0016020(membrane);GO:0046872(metal ion binding);GO:004…	05202(Transcriptional misregulation in cancers);05202(Transcriptional misregulation in cancers)	K13209	NA	PREDICTED: Capra hircus EWS RNA binding protein 1 (EWSR1), transcript variant X2, mRNA;PREDICTED: Capra hircus EWS RNA binding protein 1 (EWSR1), transcript variant X3, mRNA;PREDICTED: Capra hircus EWS RNA binding protein 1 (EWSR1), transcript variant X5, mRNA;PREDICTED: Capra hircus EWS RNA binding protein 1 (EWSR1), transcript variant X4, mRNA	49.7509	48.8572	51.249	64.4911	51.0538	53.0804
MSTRG.4076	chrNC_030815.1	65806238	65806835	-	LOC102189480	XR_001918457.1	GO:0000027(ribosomal large subunit assembly);GO:0003735(structural constituent of ribosome);GO:0006412(translation);GO:0022625(cytosolic large ribosomal subunit)	03010(Ribosome)	K02868	NA	PREDICTED: Capra hircus 60S ribosomal protein L11-like (LOC102189480), misc_RNA	49.1329	57.4719	51.3515	48.4776	58.5182	52.9904
MSTRG.8240	chrNC_030825.1	54967137	54976586	-	AP2S1	XM_013971564.2	GO:0005886(plasma membrane);GO:0005905(clathrin-coated pit);GO:0006886(intracellular protein transport);GO:0006897(endocytosis);GO:0008565(protein transporter activity);GO:0030117(membrane coat)	04144(Endocytosis);04961(Endocrine and other factor-regulated calcium reabsorption);04721(Synaptic vesicle cycle);05016(Huntington's disease)	K11827	NA	PREDICTED: Capra hircus adaptor related protein complex 2 sigma 1 subunit (AP2S1), mRNA	57.0527	53.2641	55.6113	47.2361	51.6174	52.9563
MSTRG.9743	chrNC_030828.1	58391678	58416760	-	LOC102171661	XM_005695350.3;XM_013973214.2	GO:0005496(steroid binding);GO:0005496(steroid binding)	04610(Complement and coagulation cascades);04610(Complement and coagulation cascades)	K03984	NA	PREDICTED: Capra hircus corticosteroid-binding globulin (LOC102171661), transcript variant X1, mRNA;PREDICTED: Capra hircus corticosteroid-binding globulin (LOC102171661), transcript variant X2, mRNA	73.7669	45.9839	31.3638	45.3041	67.9534	52.8744
MSTRG.2518	chrNC_030812.1	73623065	73637774	-	EIF3D	MSTRG.2518.1;XM_005680660.3;XM_018048287.1;XM_018048288.1	GO:0001731(formation of translation preinitiation complex);GO:0001732(formation of cytoplasmic translation initiation complex);GO:0003743(translation initiation factor activity);GO:0005852(eukaryotic translation initiation factor 3 complex);GO:0006413(translational initiation);GO:0006446(regulation of translational initiation);GO:0016020(membrane);GO:0016282(eukaryotic 43S preinitiation complex);…	03013(RNA transport);03013(RNA transport)	K03251	NA	PREDICTED: Capra hircus eukaryotic translation initiation factor 3 subunit D (EIF3D), transcript variant X3, mRNA;PREDICTED: Capra hircus eukaryotic translation initiation factor 3 subunit D (EIF3D), transcript variant X1, mRNA;PREDICTED: Capra hircus eukaryotic translation initiation factor 3 subunit D (EIF3D), transcript variant X2, mRNA	53.9528	57.5072	47.8107	49.0429	55.7461	52.8119
MSTRG.3469	chrNC_030814.1	71767879	71787624	+	LMAN2	XM_013965401.2;XM_013965400.2	GO:0001948(glycoprotein binding);GO:0005537(mannose binding);GO:0005615(extracellular space);GO:0005793(endoplasmic reticulum-Golgi intermediate compartment);GO:0005794(Golgi apparatus);GO:0005887(integral component of plasma membrane);GO:0006890(retrograde vesicle-mediated transport, Golgi to ER);GO:0009986(cell surface);GO:0031072(heat shock protein binding);GO:0050766(positive regulation of ph…	04141(Protein processing in endoplasmic reticulum);04141(Protein processing in endoplasmic reticulum)	K10082	NA	PREDICTED: Capra hircus lectin, mannose binding 2 (LMAN2), transcript variant X2, mRNA;PREDICTED: Capra hircus lectin, mannose binding 2 (LMAN2), transcript variant X1, mRNA	66.2629	50.4556	53.9148	42.3718	48.7977	52.3606
MSTRG.7816	chrNC_030825.1	15288346	15295243	-	LOC102188617	XM_018061848.1	GO:0005739(mitochondrion);GO:0005768(endosome);GO:0006954(inflammatory response);GO:0009055(electron carrier activity);GO:0016175(superoxide-generating NADPH oxidase activity);GO:0017004(cytochrome complex assembly);GO:0017124(SH3 domain binding);GO:0020037(heme binding);GO:0032755(positive regulation of interleukin-6 production);GO:0032760(positive regulation of tumor necrosis factor production)…	04145(Phagosome);04670(Leukocyte transendothelial migration);04380(Osteoclast differentiation);05140(Leishmaniasis)	K08009	NA	PREDICTED: Capra hircus cytochrome b-245 light chain (LOC102188617), mRNA	71.882	44.284	52.6492	44.6449	47.3043	52.1529
MSTRG.4651	chrNC_030817.1	32652334	32677277	-	PSMA3	MSTRG.4651.1;XM_005685910.3	GO:0004298(threonine-type endopeptidase activity);GO:0005634(nucleus);GO:0005737(cytoplasm);GO:0005839(proteasome core complex);GO:0006511(ubiquitin-dependent protein catabolic process);GO:0019773(proteasome core complex, alpha-subunit complex);GO:0070062(extracellular exosome)	03050(Proteasome)	K02727	EC:3.4.25.1	PREDICTED: Capra hircus proteasome subunit alpha 3 (PSMA3), mRNA	52.972	49.7597	46.6335	56.9775	54.2515	52.1188
MSTRG.820	chrNC_030809.1	46459876	46467123	+	CLK1	XM_005676346.3;MSTRG.820.2;MSTRG.820.3;MSTRG.820.4;MSTRG.820.5;XM_013971017.2	GO:0004674(protein serine/threonine kinase activity);GO:0004713(protein tyrosine kinase activity);GO:0005524(ATP binding);GO:0005634(nucleus);GO:0018105(peptidyl-serine phosphorylation);GO:0018107(peptidyl-threonine phosphorylation);GO:0018108(peptidyl-tyrosine phosphorylation);GO:0043484(regulation of RNA splicing);GO:0046777(protein autophosphorylation);GO:0046777(protein autophosphorylation)	05134(Legionellosis);05134(Legionellosis)	K08823	EC:2.7.12.1	PREDICTED: Capra hircus CDC like kinase 1 (CLK1), transcript variant X1, mRNA;PREDICTED: Capra hircus CDC like kinase 1 (CLK1), transcript variant X2, mRNA	44.5296	61.1216	48.4612	51.0994	55.1845	52.0793
MSTRG.5061	chrNC_030818.1	1831785	1846586	+	LOC102172271	MSTRG.5061.1;XM_018054824.1;XM_018054822.1;XM_018054823.1;XM_018054821.1	GO:0016021(integral component of membrane);GO:0016021(integral component of membrane)	NA	NA	NA	PREDICTED: Capra hircus myelin and lymphocyte protein (LOC102172271), transcript variant X4, mRNA;PREDICTED: Capra hircus myelin and lymphocyte protein (LOC102172271), transcript variant X2, mRNA;PREDICTED: Capra hircus myelin and lymphocyte protein (LOC102172271), transcript variant X3, mRNA;PREDICTED: Capra hircus myelin and lymphocyte protein (LOC102172271), transcript variant X1, mRNA	44.5399	50.5092	74.2523	38.693	52.3492	52.0687
MSTRG.11281	chrNC_030832.1	36822624	36825287	-	MOSPD3	XM_005698076.3;XM_018040382.1;XM_018040381.1	GO:0005789(endoplasmic reticulum membrane);GO:0007507(heart development);GO:0016021(integral component of membrane);GO:0016021(integral component of membrane)	NA	NA	NA	PREDICTED: Capra hircus motile sperm domain containing 3 (MOSPD3), transcript variant X1, mRNA;PREDICTED: Capra hircus motile sperm domain containing 3 (MOSPD3), transcript variant X3, mRNA;PREDICTED: Capra hircus motile sperm domain containing 3 (MOSPD3), transcript variant X2, mRNA	51.8393	54.293	54.6125	46.272	53.2365	52.0506
MSTRG.12493	chrNW_017189517.1	2451079	2451899	-	LOC102181479	XR_001297494.2	GO:0000463(maturation of LSU-rRNA from tricistronic rRNA transcript (SSU-rRNA, 5.8S rRNA, LSU-rRNA));GO:0002181(cytoplasmic translation);GO:0003735(structural constituent of ribosome);GO:0022625(cytosolic large ribosomal subunit);GO:0044822(poly(A) RNA binding)	03010(Ribosome)	K02937	NA	PREDICTED: Capra hircus 60S ribosomal protein L7 pseudogene (LOC102181479), misc_RNA	64.7897	64.0576	58.9232	30.8208	41.448	52.0079
MSTRG.464	chrNC_030808.1	145152446	145246309	+	COL18A1	XM_018052213.1;XM_018052196.1;XM_018052207.1;MSTRG.464.10;MSTRG.464.11;MSTRG.464.12;MSTRG.464.4;MSTRG.464.5;MSTRG.464.6;MSTRG.464.7;MSTRG.464.8;MSTRG.464.9;XM_018052201.1;MSTRG.464.14;MSTRG.464.15;MSTRG.464.16	GO:0001525(angiogenesis);GO:0001886(endothelial cell morphogenesis);GO:0005198(structural molecule activity);GO:0005581(collagen trimer);GO:0005604(basement membrane);GO:0005615(extracellular space);GO:0007155(cell adhesion);GO:0008284(positive regulation of cell proliferation);GO:0030198(extracellular matrix organization);GO:0030335(positive regulation of cell migration);GO:0042802(identical pro…	04974(Protein digestion and absorption);04974(Protein digestion and absorption)	K06823	NA	PREDICTED: Capra hircus collagen type XVIII alpha 1 chain (COL18A1), transcript variant X4, mRNA;PREDICTED: Capra hircus collagen type XVIII alpha 1 chain (COL18A1), transcript variant X1, mRNA;PREDICTED: Capra hircus collagen type XVIII alpha 1 chain (COL18A1), transcript variant X3, mRNA;PREDICTED: Capra hircus collagen type XVIII alpha 1 chain (COL18A1), transcript variant X2, mRNA	45.3889	44.9328	59.4092	73.851	36.3532	51.987
MSTRG.6070	chrNC_030820.1	53352356	53355398	-	SLC2A4RG	MSTRG.6070.2;MSTRG.6070.1;XM_018057500.1	GO:0005654(nucleoplasm);GO:0046872(metal ion binding)	NA	NA	NA	PREDICTED: Capra hircus SLC2A4 regulator (SLC2A4RG), mRNA	41.3459	46.8852	52.488	77.9042	40.9539	51.9155
MSTRG.12369	chrNW_017189516.1	14646269	14730609	-	MAGED1	MSTRG.12369.1;MSTRG.12369.2;MSTRG.12369.3;MSTRG.12369.4;XM_018043888.1;MSTRG.12369.5;XM_018043889.1	GO:0000785(chromatin);GO:0003713(transcription coactivator activity);GO:0005634(nucleus);GO:0006357(regulation of transcription from RNA polymerase II promoter);GO:0032922(circadian regulation of gene expression);GO:0042752(regulation of circadian rhythm);GO:0043234(protein complex);GO:0043406(positive regulation of MAP kinase activity);GO:0045892(negative regulation of transcription, DNA-templat…	04722(Neurotrophin signaling pathway);04722(Neurotrophin signaling pathway)	K12464	NA	PREDICTED: Capra hircus MAGE family member D1 (MAGED1), transcript variant X1, mRNA;PREDICTED: Capra hircus MAGE family member D1 (MAGED1), transcript variant X2, mRNA	59.4459	65.8979	66.3643	33.1792	34.3078	51.839
MSTRG.4102	chrNC_030815.1	73424586	73449939	+	BNIP3L	XM_018052351.1;MSTRG.4102.2;XM_018052352.1;MSTRG.4102.4;MSTRG.4102.5;MSTRG.4102.6;XM_018052353.1	GO:0005521(lamin binding);GO:0005635(nuclear envelope);GO:0005739(mitochondrion);GO:0005741(mitochondrial outer membrane);GO:0005783(endoplasmic reticulum);GO:0016021(integral component of membrane);GO:0016239(positive regulation of macroautophagy);GO:0035694(mitochondrial protein catabolic process);GO:0042803(protein homodimerization activity);GO:0043065(positive regulation of apoptotic process)…	04068(FoxO signaling pathway);04068(FoxO signaling pathway)	K15464	NA	PREDICTED: Capra hircus BCL2 interacting protein 3 like (BNIP3L), transcript variant X1, mRNA;PREDICTED: Capra hircus BCL2 interacting protein 3 like (BNIP3L), transcript variant X2, mRNA;PREDICTED: Capra hircus BCL2 interacting protein 3 like (BNIP3L), transcript variant X3, mRNA	60.5987	58.8431	51.7204	38.6891	48.6731	51.7049
[truncated: 11,837 more rows]

## Sheet: FR
S2 List of expressed genes of goats in FR group.
gene_id	chr	start	end	strand	gene_name	transcript_id	GO	KEGG	KO_ENTRY	EC	Description	FPKM.FR1	FPKM.FR2	FPKM.FR4	FPKM.FR5	FPKM_average
[truncated: 12,493 more rows]

## Sheet: KC
S2 List of expressed genes of goats in KC group.
gene_id	chr	start	end	strand	gene_name	transcript_id	GO	KEGG	KO_ENTRY	EC	Description	FPKM.KC2	FPKM.KC3	FPKM.KC4	FPKM_average
[truncated: 12,041 more rows]

## Sheet: KR
S2 List of expressed genes of goats in KR group.
gene_id	chr	start	end	strand	gene_name	transcript_id	GO	KEGG	KO_ENTRY	EC	Description	FPKM.KR1	FPKM.KR2	FPKM.KR3	FPKM.KR4	FPKM_average
[truncated: 12,172 more rows]
