# Supplementary material for: Transcriptome analysis reveals liver metabolism programming in kids from nutritional restricted goats during mid-gestation
Source: PeerJ. 2021 Jan 29;9:e10593. doi: 10.7717/peerj.10593 (PMC7849524; doi:10.7717/peerj.10593)
Supplement: Supplemental Information 6 — DEGs of fetal goats between KC and KR groups and DEGs of kid goats between KC and KR groups. [file peerj-09-10593-s006.xlsx]

## Sheet: FC vs. FR
S4 Differentially expressed gene list of fetal goats between FC and FR groups
gene_id	gene_name	transcript_id	GO	KEGG	KO_ENTRY	EC	Description	FPKM.FR1	FPKM.FR2	FPKM.FR4	FPKM.FR5	FPKM.FC1	FPKM.FC2	FPKM.FC3	FPKM.FC4	FPKM.FC5	FC	log2(FC)	pval	qval	regulation	significant
102169930	DAB1	XM_018044682.1;XM_018044685.1	GO:0005515(protein binding);GO:0005730(nucleolus);GO:0005815(microtubule organizing center);GO:0005829(cytosol);GO:0005903(brush border);GO:0007162(negative regulation of cell adhesion);GO:0007264(small GTPase mediated signal transduction);GO:0007494(midgut development);GO:0007628(adult walking behavior);GO:0014069(postsynaptic density);GO:0016020(membrane);GO:0016358(dendrite development);GO:002…	04144(Endocytosis);04144(Endocytosis)	K12475		PREDICTED: Capra hircus DAB1, reelin adaptor protein (DAB1), transcript variant X1, mRNA;PREDICTED: Capra hircus DAB1, reelin adaptor protein (DAB1), transcript variant X2, mRNA	0.16	1.23	1.16	1.24	0.25	0.24	0.34	0.96	0.61	1.97396	0.981092	0.00164219	0.0796561	up	yes
102170485	FLNC	XM_018046955.1;XM_018046953.1	GO:0005737(cytoplasm);GO:0005925(focal adhesion);GO:0030506(ankyrin binding);GO:0042383(sarcolemma);GO:0048747(muscle fiber development);GO:0051015(actin filament binding);GO:0051015(actin filament binding)	04010(MAPK signaling pathway);04510(Focal adhesion);05205(Proteoglycans in cancer);05132(Salmonella infection);05132(Salmonella infection)	K04437		PREDICTED: Capra hircus filamin C (FLNC), transcript variant X3, mRNA;PREDICTED: Capra hircus filamin C (FLNC), transcript variant X1, mRNA	1.85	2.1	3.38	3.83	1.26	2.17	1.99	4.26	0.8	1.33111	0.412626	0.000116124	0.0326183	up	yes
102174310	SULT1C2	XM_018055315.1;XM_005686653.3;XM_013967718.2	GO:0008146(sulfotransferase activity);GO:0051923(sulfation);GO:0070062(extracellular exosome);GO:0070062(extracellular exosome)	00140(Steroid hormone biosynthesis);00140(Steroid hormone biosynthesis)	K01016	EC:2.8.2.4	PREDICTED: Capra hircus sulfotransferase family 1C member 2 (SULT1C2), transcript variant X4, mRNA;PREDICTED: Capra hircus sulfotransferase family 1C member 2 (SULT1C2), transcript variant X3, mRNA;PREDICTED: Capra hircus sulfotransferase family 1C member 2 (SULT1C2), transcript variant X1, mRNA	0.09	0.65	0.93	0.59	0.31	0.44	0.49	0.86	0.19	1.23362	0.302903	0.000636133	0.0512014	up	yes
102174844	CCL19	XM_005684094.3;XM_005684095.3	GO:0001768(establishment of T cell polarity);GO:0002408(myeloid dendritic cell chemotaxis);GO:0002548(monocyte chemotaxis);GO:0005615(extracellular space);GO:0005622(intracellular);GO:0006954(inflammatory response);GO:0007186(G-protein coupled receptor signaling pathway);GO:0008009(chemokine activity);GO:0030593(neutrophil chemotaxis);GO:0031735(CCR10 chemokine receptor binding);GO:0034695(respon…	04064(NF-kappa B signaling pathway);04060(Cytokine-cytokine receptor interaction);04062(Chemokine signaling pathway);04062(Chemokine signaling pathway)	K05512		PREDICTED: Capra hircus C-C motif chemokine ligand 19 (CCL19), transcript variant X1, mRNA;PREDICTED: Capra hircus C-C motif chemokine ligand 19 (CCL19), transcript variant X2, mRNA	0.16	0.44	0.14	0.13	2.93	0.28	0.36	0.39	0.19	0.262048	-1.9321	0.00040596	0.044654	down	yes
102175545	SHISA9	XM_013974976.2;XM_013974977.2;XM_013974979.2	GO:0032281(AMPA glutamate receptor complex);GO:0045202(synapse);GO:0048172(regulation of short-term neuronal synaptic plasticity);GO:0048172(regulation of short-term neuronal synaptic plasticity)	04974(Protein digestion and absorption);04974(Protein digestion and absorption)	K14211		PREDICTED: Capra hircus shisa family member 9 (SHISA9), transcript variant X1, mRNA;PREDICTED: Capra hircus shisa family member 9 (SHISA9), transcript variant X2, mRNA;PREDICTED: Capra hircus shisa family member 9 (SHISA9), transcript variant X3, mRNA	0.73	0.99	0.87	0.97	1.58	1.39	1.25	0.95	2.71	0.564721	-0.82439	0.00104719	0.0644919	down	yes
102175657	PHF21B	XM_018048893.1;XM_018048892.1	GO:0000977(RNA polymerase II regulatory region sequence-specific DNA binding);GO:0003682(chromatin binding);GO:0003712(transcription cofactor activity);GO:0005634(nucleus);GO:0006355(regulation of transcription, DNA-templated);GO:0008270(zinc ion binding);GO:0042393(histone binding);GO:0046872(metal ion binding);GO:0046872(metal ion binding)	05203(Viral carcinogenesis);05203(Viral carcinogenesis)	K11643	EC:3.6.4.12	PREDICTED: Capra hircus PHD finger protein 21B (PHF21B), transcript variant X2, mRNA;PREDICTED: Capra hircus PHD finger protein 21B (PHF21B), transcript variant X1, mRNA	0.13	0.25	0.27	0.34	0.52	0.41	0.32	0.11	0.84	0.5625	-0.830075	0.000179366	0.034214	down	yes
102175707	CCDC8	XM_005709596.3	GO:0000226(microtubule cytoskeleton organization);GO:0005737(cytoplasm);GO:0005813(centrosome);GO:0005886(plasma membrane);GO:0007088(regulation of mitotic nuclear division);GO:0010923(negative regulation of phosphatase activity);GO:1990393(3M complex)				PREDICTED: Capra hircus coiled-coil domain containing 8 (CCDC8), mRNA	2.27	4.93	2.91	4.98	4.55	5.46	4.84	4.28	4.56	0.796222	-0.328757	0.000155406	0.034214	down	yes
102175709	LOC102175709	XM_018063285.1	GO:0000064(L-ornithine transmembrane transporter activity);GO:0005887(integral component of plasma membrane);GO:0015181(arginine transmembrane transporter activity);GO:0015189(L-lysine transmembrane transporter activity);GO:0015297(antiporter activity);GO:1903352(L-ornithine transmembrane transport);GO:1903401(L-lysine transmembrane transport)	05206(MicroRNAs in cancer)	K13863		PREDICTED: Capra hircus cationic amino acid transporter 3-like (LOC102175709), mRNA	0.54	0.57	0.59	1.09	0.82	0.51	0.59	0.62	0.11	1.31604	0.396201	0.000671832	0.0525299	up	yes
102176755	LOC102176755	XM_018039853.1					PREDICTED: Capra hircus collagen alpha-1(III) chain (LOC102176755), mRNA	2.87	4.52	3.71	5.1	0.76	0.6	2.92	5.43	2.59	1.64634	0.719264	0.000690669	0.0530881	up	yes
102177585	IPMK	XM_018041614.1;XM_018041615.1	GO:0000824(inositol tetrakisphosphate 3-kinase activity);GO:0001841(neural tube formation);GO:0005654(nucleoplasm);GO:0005730(nucleolus);GO:0008440(inositol-1,4,5-trisphosphate 3-kinase activity);GO:0016310(phosphorylation);GO:0032958(inositol phosphate biosynthetic process);GO:0032958(inositol phosphate biosynthetic process)	00562(Inositol phosphate metabolism);04070(Phosphatidylinositol signaling system);04070(Phosphatidylinositol signaling system)	K00915	EC:2.7.1.140;EC:2.7.1.151	PREDICTED: Capra hircus inositol polyphosphate multikinase (IPMK), transcript variant X1, mRNA;PREDICTED: Capra hircus inositol polyphosphate multikinase (IPMK), transcript variant X2, mRNA	0.01	0	0.03	0.59	0.01	0.59	0.6	0.03	1.03	0.348451	-1.52097	1.34432e-07	0.000776942	down	yes
102182144	SNAP25	XM_005687813.3;XM_005687812.3	GO:0005484(SNAP receptor activity);GO:0005886(plasma membrane);GO:0016082(synaptic vesicle priming);GO:0017075(syntaxin-1 binding);GO:0031629(synaptic vesicle fusion to presynaptic active zone membrane);GO:0070032(synaptobrevin 2-SNAP-25-syntaxin-1a-complexin I complex);GO:0005802(trans-Golgi network);GO:0007626(locomotory behavior);GO:0008306(associative learning);GO:0010975(regulation of neuron…	04911(Insulin secretion);04721(Synaptic vesicle cycle);04721(Synaptic vesicle cycle)	K18211		PREDICTED: Capra hircus synaptosome associated protein 25 (SNAP25), transcript variant X2, mRNA;PREDICTED: Capra hircus synaptosome associated protein 25 (SNAP25), transcript variant X1, mRNA	3.86	4.55	4.77	3.85	3.9	3.28	2.52	3.77	3.49	1.25516	0.32787	0.000770712	0.0556871	up	yes
102183712	CAPN8	XM_018060195.1;XM_013970127.2;XM_018060194.1	GO:0004198(calcium-dependent cysteine-type endopeptidase activity);GO:0005509(calcium ion binding);GO:0005737(cytoplasm);GO:0006508(proteolysis);GO:0007586(digestion);GO:0007586(digestion)	04141(Protein processing in endoplasmic reticulum);04210(Apoptosis);04510(Focal adhesion);05010(Alzheimer's disease);05010(Alzheimer's disease)	K03853	EC:3.4.22.53	PREDICTED: Capra hircus calpain 8 (CAPN8), transcript variant X3, mRNA;PREDICTED: Capra hircus calpain 8 (CAPN8), transcript variant X1, mRNA;PREDICTED: Capra hircus calpain 8 (CAPN8), transcript variant X2, mRNA	17.81	8.45	2.63	4.39	0.53	2.44	3.82	5.33	2.89	2.77149	1.47066	0.000445746	0.0451569	up	yes
102185362	SIM1	XM_018053128.1	GO:0000981(RNA polymerase II transcription factor activity, sequence-specific DNA binding);GO:0001657(ureteric bud development);GO:0003677(DNA binding);GO:0005634(nucleus);GO:0006351(transcription, DNA-templated);GO:0006357(regulation of transcription from RNA polymerase II promoter);GO:0007399(nervous system development);GO:0046982(protein heterodimerization activity)	04150(mTOR signaling pathway)	K08268		PREDICTED: Capra hircus single-minded family bHLH transcription factor 1 (SIM1), mRNA	0.91	1.22	0.88	1.4	0.42	0.73	0.76	0.24	1.81	1.39205	0.477206	0.00206064	0.0920798	up	yes
102185635	ARHGAP32	XM_018043237.1;XM_018043235.1;XM_018043236.1	GO:0005938(cell cortex);GO:0007165(signal transduction);GO:0015629(actin cytoskeleton);GO:0035091(phosphatidylinositol binding);GO:0035091(phosphatidylinositol binding)	05200(Pathways in cancer);05220(Chronic myeloid leukemia);05220(Chronic myeloid leukemia)	K08878	EC:2.7.11.1	PREDICTED: Capra hircus Rho GTPase activating protein 32 (ARHGAP32), transcript variant X3, mRNA;PREDICTED: Capra hircus Rho GTPase activating protein 32 (ARHGAP32), transcript variant X1, mRNA;PREDICTED: Capra hircus Rho GTPase activating protein 32 (ARHGAP32), transcript variant X2, mRNA	0.07	0.14	1.35	1.48	1.79	1.34	1.12	1.66	1.19	0.535211	-0.90182	0.000430219	0.0451569	down	yes
102185772	MPO	XM_018063571.1;NM_001314186.1	GO:0001878(response to yeast);GO:0002149(hypochlorous acid biosynthetic process);GO:0002679(respiratory burst involved in defense response);GO:0004601(peroxidase activity);GO:0005615(extracellular space);GO:0005634(nucleus);GO:0005739(mitochondrion);GO:0008201(heparin binding);GO:0019430(removal of superoxide radicals);GO:0020037(heme binding);GO:0034374(low-density lipoprotein particle remodelin…	04145(Phagosome);05202(Transcriptional misregulation in cancers);05202(Transcriptional misregulation in cancers)	K10789	EC:1.11.2.2	PREDICTED: Capra hircus myeloperoxidase (MPO), transcript variant X1, mRNA;Capra hircus myeloperoxidase (MPO), mRNA	1.09	1	0.99	0.52	0.97	0.4	2.11	1.03	1.02	0.813743	-0.297354	0.000133594	0.034214	down	yes
102186194	FRMD7	XM_005700325.2	GO:0005856(cytoskeleton)	04520(Adherens junction)	K06082		PREDICTED: Capra hircus FERM domain containing 7 (FRMD7), mRNA	0.73	0.95	2.13	1.37	0.73	1.37	1.34	3.23	3.95	0.609699	-0.713832	0.000244298	0.035892	down	yes
102187350	RUNDC3A	XM_018065228.1;XM_018065229.1;XM_018065227.1;XM_018065233.1;XM_018065231.1;XM_018065230.1;XM_018065225.1;XM_018065226.1;XM_018065232.1	GO:0005515(protein binding);GO:0005829(cytosol);GO:0005886(plasma membrane);GO:0007264(small GTPase mediated signal transduction);GO:0030250(guanylate cyclase activator activity);GO:0030695(GTPase regulator activity);GO:0031284(positive regulation of guanylate cyclase activity);GO:0051428(peptide hormone receptor binding);GO:0051428(peptide hormone receptor binding)	02010(ABC transporters);04976(Bile secretion);04976(Bile secretion)	K05659	EC:3.6.3.44	PREDICTED: Capra hircus RUN domain containing 3A (RUNDC3A), transcript variant X4, mRNA;PREDICTED: Capra hircus RUN domain containing 3A (RUNDC3A), transcript variant X5, mRNA;PREDICTED: Capra hircus RUN domain containing 3A (RUNDC3A), transcript variant X3, mRNA;PREDICTED: Capra hircus RUN domain containing 3A (RUNDC3A), transcript variant X9, mRNA;PREDICTED: Capra hircus RUN domain containing 3…	4.06	0.63	4.48	3.46	2.12	0.83	0.37	4.04	3.73	1.42358	0.509523	0.000633016	0.0512014	up	yes
102189829	CNTNAP2	XM_018046828.1	GO:0005515(protein binding);GO:0005769(early endosome);GO:0005794(Golgi apparatus);GO:0007155(cell adhesion);GO:0007420(brain development);GO:0007612(learning);GO:0008038(neuron recognition);GO:0008076(voltage-gated potassium channel complex);GO:0009986(cell surface);GO:0016020(membrane);GO:0016021(integral component of membrane);GO:0019226(transmission of nerve impulse);GO:0019899(enzyme binding…	04514(Cell adhesion molecules (CAMs))	K07380		PREDICTED: Capra hircus contactin associated protein-like 2 (CNTNAP2), mRNA	1.09	1.11	0.84	1.25	0.56	0.63	0.72	0.81	1.33	1.32407	0.404984	0.00138689	0.0732267	up	yes
102190112	A4GALT	XM_018048862.1	GO:0001576(globoside biosynthetic process);GO:0007009(plasma membrane organization);GO:0015643(toxic substance binding);GO:0016021(integral component of membrane);GO:0050512(lactosylceramide 4-alpha-galactosyltransferase activity);GO:0070062(extracellular exosome)	00603(Glycosphingolipid biosynthesis - globo series)	K01988	EC:2.4.1.228	PREDICTED: Capra hircus alpha 1,4-galactosyltransferase (A4GALT), mRNA	0.79	1.5	2.78	1.21	2.37	1.97	2.39	1.53	1.57	0.798576	-0.324499	0.000773463	0.0556871	down	yes
106503623	ELFN1	XM_013975026.2	GO:0010923(negative regulation of phosphatase activity);GO:0016021(integral component of membrane);GO:0019902(phosphatase binding);GO:0030425(dendrite);GO:0050808(synapse organization);GO:0060076(excitatory synapse);GO:0070062(extracellular exosome)	04010(MAPK signaling pathway);04020(Calcium signaling pathway)	K04856		PREDICTED: Capra hircus extracellular leucine rich repeat and fibronectin type III domain containing 1 (ELFN1), mRNA	2.44	3.51	2.45	4.23	4.84	4.41	5.22	2.55	4.04	0.749644	-0.415723	0.00028668	0.0372352	down	yes
108633222	LIPN	XM_018041737.1	GO:0016021(integral component of membrane);GO:0016788(hydrolase activity, acting on ester bonds)	00100(Steroid biosynthesis);04142(Lysosome)	K01052	EC:3.1.1.13	PREDICTED: Capra hircus lipase family member N (LIPN), transcript variant X1, mRNA	0.32	0.86	0.92	0.72	0.05	0.36	0.42	0.04	0.04	3.87363	1.95368	0.000107071	0.0326183	up	yes
108634002	LOC108634002	XM_018041100.1					PREDICTED: Capra hircus uncharacterized LOC108634002 (LOC108634002), mRNA	1.06	0.8	2.36	2.06	2.81	1.41	1.63	1.85	3.07	0.728877	-0.456254	8.73131e-05	0.0317524	down	yes
MSTRG.10177		MSTRG.10177.1						3.3	0.07	5.92	2.29	2.23	4.92	11.25	2.01	1.36	0.664906	-0.588778	0.00129567	0.0704908	down	yes
MSTRG.10179	VGLL4	XM_018066985.1;MSTRG.10179.1;XM_018066979.1;XM_018066983.1;XM_018066982.1;XM_018066984.1;XM_018066980.1	GO:0006355(regulation of transcription, DNA-templated);GO:0006355(regulation of transcription, DNA-templated)				PREDICTED: Capra hircus vestigial like family member 4 (VGLL4), transcript variant X7, mRNA;PREDICTED: Capra hircus vestigial like family member 4 (VGLL4), transcript variant X1, mRNA;PREDICTED: Capra hircus vestigial like family member 4 (VGLL4), transcript variant X5, mRNA;PREDICTED: Capra hircus vestigial like family member 4 (VGLL4), transcript variant X4, mRNA;PREDICTED: Capra hircus vestigi…	2.03	10.23	8.78	9.72	11.68	12.44	9.86	7.4	8.27	0.774421	-0.36881	0.00230973	0.0957236	down	yes
MSTRG.10436	LY6G6F;LY6G6D	XM_005696664.2;MSTRG.10436.2;XM_005696576.2	GO:0005886(plasma membrane);GO:0016021(integral component of membrane);GO:0030550(acetylcholine receptor inhibitor activity);GO:0031225(anchored component of membrane)				PREDICTED: Capra hircus lymphocyte antigen 6 complex, locus G6F (LY6G6F), mRNA;PREDICTED: Capra hircus lymphocyte antigen 6 complex, locus G6D (LY6G6D), mRNA	11.48	7.08	7.58	9.39	9.14	11.07	12.03	14.16	11.13	0.771989	-0.373349	0.000348862	0.0417656	down	yes
MSTRG.10440	C23H6orf25	XM_005709546.3;XM_018038624.1;MSTRG.10440.3	GO:0005886(plasma membrane);GO:0007229(integrin-mediated signaling pathway);GO:0007596(blood coagulation);GO:0016021(integral component of membrane);GO:0030220(platelet formation);GO:0035855(megakaryocyte development);GO:0035855(megakaryocyte development)				PREDICTED: Capra hircus chromosome 23 C6orf25 homolog (C23H6orf25), transcript variant X1, mRNA;PREDICTED: Capra hircus chromosome 23 C6orf25 homolog (C23H6orf25), transcript variant X2, mRNA	5.65	11.53	15.35	15.19	28.79	16.39	25.36	8.49	23.38	0.582463	-0.779763	0.000273951	0.0371226	down	yes
MSTRG.1054		MSTRG.1054.1						0.36	4.97	4.76	8.42	12.7	6.43	6.64	0	5.05	0.75073	-0.413634	0.000207297	0.0352694	down	yes
MSTRG.10568	MDFI	XM_018039288.1;XM_018039284.1;XM_018039285.1;XM_018039287.1;XM_018039286.1;MSTRG.10568.6;MSTRG.10568.7	GO:0000122(negative regulation of transcription from RNA polymerase II promoter);GO:0005622(intracellular);GO:0007257(activation of JUN kinase activity);GO:0008134(transcription factor binding);GO:0009950(dorsal/ventral axis specification);GO:0030178(negative regulation of Wnt signaling pathway);GO:0043392(negative regulation of DNA binding);GO:0048704(embryonic skeletal system morphogenesis);GO:…				PREDICTED: Capra hircus MyoD family inhibitor (MDFI), transcript variant X5, mRNA;PREDICTED: Capra hircus MyoD family inhibitor (MDFI), transcript variant X1, mRNA;PREDICTED: Capra hircus MyoD family inhibitor (MDFI), transcript variant X2, mRNA;PREDICTED: Capra hircus MyoD family inhibitor (MDFI), transcript variant X4, mRNA;PREDICTED: Capra hircus MyoD family inhibitor (MDFI), transcript varian…	13.93	24.04	18	7.75	14.13	14.08	11.09	9.28	11.71	1.32111	0.401756	0.00233427	0.0962869	up	yes
MSTRG.10571	TREML1	MSTRG.10571.1;MSTRG.10571.2;XM_005696299.2	GO:0009986(cell surface);GO:0016021(integral component of membrane);GO:0019722(calcium-mediated signaling);GO:0030168(platelet activation);GO:0031091(platelet alpha granule)				PREDICTED: Capra hircus triggering receptor expressed on myeloid cells like 1 (TREML1), mRNA	5.97	12.53	13.18	13.54	19.18	11.66	20.28	10.03	16.06	0.732094	-0.449899	0.000552287	0.0489233	down	yes
MSTRG.10582	ZFAND3	MSTRG.10582.1						13.62	1.19	0.92	0.22	0.18	0.46	1.24	3.29	6.81	1.66423	0.734857	0.00190345	0.0877262	up	yes
MSTRG.10834	LOC108633873	XM_018040088.1;MSTRG.10834.2;MSTRG.10834.3	GO:0005344(oxygen transporter activity);GO:0005506(iron ion binding);GO:0005833(hemoglobin complex);GO:0015671(oxygen transport);GO:0019825(oxygen binding);GO:0020037(heme binding)	05144(Malaria);05143(African trypanosomiasis)	K13822		PREDICTED: Capra hircus hemoglobin subunit zeta-like (LOC108633873), mRNA	17.35	21.88	23.82	21.64	18.03	23.65	29.62	29.11	31.75	0.801018	-0.320094	0.000345816	0.0417656	down	yes
MSTRG.10958	C25H16orf96	XM_018040391.1	GO:0003674(molecular_function);GO:0005575(cellular_component);GO:0008150(biological_process)	04064(NF-kappa B signaling pathway);04072(Phospholipase D signaling pathway);04151(PI3K-Akt signaling pathway);04611(Platelet activation);04650(Natural killer cell mediated cytotoxicity);04662(B cell receptor signaling pathway);04664(Fc epsilon RI signaling pathway);04666(Fc gamma R-mediated phagocytosis);04380(Osteoclast differentiation);05203(Viral carcinogenesis);05152(Tuberculosis);05169(Epst…	K05855	EC:2.7.10.2	PREDICTED: Capra hircus chromosome 25 C16orf96 homolog (C25H16orf96), mRNA	0.88	1.5	1.83	1.39	1.97	2.38	1.66	1.55	0.96	0.821596	-0.283499	0.00159918	0.0789553	down	yes
MSTRG.10968	C25H16orf89	XM_013974888.2	GO:0005829(cytosol);GO:0016020(membrane);GO:0042803(protein homodimerization activity);GO:0070062(extracellular exosome)				PREDICTED: Capra hircus chromosome 25 C16orf89 homolog (C25H16orf89), mRNA	2.16	4	3.5	5.27	1.84	3.02	2.11	2.41	1.35	1.73928	0.798492	3.69793e-05	0.0232466	up	yes
MSTRG.11252	COL26A1	XM_018041048.1	GO:0005578(proteinaceous extracellular matrix);GO:0005783(endoplasmic reticulum);GO:0005794(Golgi apparatus);GO:0010811(positive regulation of cell-substrate adhesion)				PREDICTED: Capra hircus collagen type XXVI alpha 1 chain (COL26A1), mRNA	3.03	2.46	3.45	2.28	6.49	4.14	3.94	4.6	2.94	0.634328	-0.656698	0.000487857	0.0460584	down	yes
MSTRG.11407	FAM196A	XM_018041177.1;XM_018041178.1	GO:0003674(molecular_function);GO:0005575(cellular_component);GO:0008150(biological_process);GO:0008150(biological_process)				PREDICTED: Capra hircus family with sequence similarity 196 member A (FAM196A), transcript variant X1, mRNA;PREDICTED: Capra hircus family with sequence similarity 196 member A (FAM196A), transcript variant X2, mRNA	1.85	1.17	3.98	2.22	1.92	2.24	2.98	5.25	2.23	0.788304	-0.343177	0.00215484	0.0934875	down	yes
MSTRG.1144	MPL	XM_005678577.2	GO:0005794(Golgi apparatus);GO:0005886(plasma membrane);GO:0009986(cell surface);GO:0016021(integral component of membrane);GO:0038163(thrombopoietin-mediated signaling pathway);GO:0038164(thrombopoietin receptor activity)	04630(Jak-STAT signaling pathway);04060(Cytokine-cytokine receptor interaction)	K05082		PREDICTED: Capra hircus MPL proto-oncogene, thrombopoietin receptor (MPL), mRNA	0.77	1.33	1.59	2.18	3.02	2.01	2.3	1.1	2.57	0.667045	-0.584143	0.00120836	0.0678235	down	yes
MSTRG.11455	NRAP	XM_005698494.3;XM_005698495.3;XM_013975292.2;XM_018041477.1;MSTRG.11455.5;MSTRG.11455.6	GO:0003779(actin binding);GO:0005916(fascia adherens);GO:0005927(muscle tendon junction);GO:0008270(zinc ion binding);GO:0017166(vinculin binding);GO:0030016(myofibril);GO:0051371(muscle alpha-actinin binding);GO:0051371(muscle alpha-actinin binding)				PREDICTED: Capra hircus nebulin related anchoring protein (NRAP), transcript variant X2, mRNA;PREDICTED: Capra hircus nebulin related anchoring protein (NRAP), transcript variant X4, mRNA;PREDICTED: Capra hircus nebulin related anchoring protein (NRAP), transcript variant X3, mRNA;PREDICTED: Capra hircus nebulin related anchoring protein (NRAP), transcript variant X1, mRNA	0.28	1.5	2.11	0.84	0.25	0.86	0.94	1.16	0.94	1.4247	0.510657	0.0011064	0.0658644	up	yes
MSTRG.11514	SLF2	XM_005698331.2;XM_005698332.2	GO:0000785(chromatin);GO:0005615(extracellular space);GO:0005634(nucleus);GO:0006974(cellular response to DNA damage stimulus);GO:0031334(positive regulation of protein complex assembly);GO:0031625(ubiquitin protein ligase binding);GO:0032403(protein complex binding);GO:0034184(positive regulation of maintenance of mitotic sister chromatid cohesion);GO:0035861(site of double-strand break);GO:1990…				PREDICTED: Capra hircus SMC5-SMC6 complex localization factor 2 (SLF2), transcript variant X1, mRNA;PREDICTED: Capra hircus SMC5-SMC6 complex localization factor 2 (SLF2), transcript variant X2, mRNA	0.19	4.65	0.2	0.23	0.29	0.24	0.28	0.18	0.18	5.63034	2.49322	0.000459336	0.0451569	up	yes
MSTRG.11521	LOC102180722	MSTRG.11521.1						0.14	0	0.19	0	1.23	0.14	0.51	2.11	0.48	0.0922819	-3.43781	4.74878e-06	0.00533084	down	yes
MSTRG.11622	LOC102186455	MSTRG.11622.1						0.02	2.79	0.01	0	0.01	0.03	0.01	0.02	0.03	35.25	5.13955	6.32253e-05	0.0301106	up	yes
MSTRG.11623		MSTRG.11623.1						0.04	1.84	0	0	0.01	0.03	0.01	0	0.01	39.1667	5.29155	0.000526315	0.0483381	up	yes
MSTRG.11680	DUSP26	MSTRG.11680.1;XM_018042128.1;MSTRG.11680.3;XM_018042127.1	GO:0000122(negative regulation of transcription from RNA polymerase II promoter);GO:0001102(RNA polymerase II activating transcription factor binding);GO:0002039(p53 binding);GO:0004647(phosphoserine phosphatase activity);GO:0004725(protein tyrosine phosphatase activity);GO:0005634(nucleus);GO:0005739(mitochondrion);GO:0005794(Golgi apparatus);GO:0008138(protein tyrosine/serine/threonine phosphat…	04010(MAPK signaling pathway);04010(MAPK signaling pathway)	K17614	EC:3.1.3.16;EC:3.1.3.48	PREDICTED: Capra hircus dual specificity phosphatase 26 (putative) (DUSP26), transcript variant X2, mRNA;PREDICTED: Capra hircus dual specificity phosphatase 26 (putative) (DUSP26), transcript variant X1, mRNA	36.15	39.47	39.04	35.55	47.01	55.39	102.63	31.97	51.22	0.651455	-0.618261	0.00113059	0.0660379	down	yes
MSTRG.11742		MSTRG.11742.1						0.14	0.03	0	0	0.05	0.14	0.04	0.08	0.09	0.53125	-0.912537	5.35534e-05	0.0284211	down	yes
MSTRG.11796	ADIRF	XM_005699317.3	GO:0005634(nucleus);GO:0005654(nucleoplasm);GO:0005737(cytoplasm);GO:0045600(positive regulation of fat cell differentiation);GO:0045944(positive regulation of transcription from RNA polymerase II promoter);GO:0070062(extracellular exosome);GO:0071478(cellular response to radiation);GO:0072719(cellular response to cisplatin);GO:2001023(regulation of response to drug)				PREDICTED: Capra hircus adipogenesis regulatory factor (ADIRF), mRNA	317.22	157.81	175.84	114.01	139.12	295.94	290.75	235.61	236.78	0.797947	-0.325635	0.000441042	0.0451569	down	yes
MSTRG.12017	NRGN	XR_001917513.1	GO:0005516(calmodulin binding)				PREDICTED: Capra hircus neurogranin (NRGN), ncRNA	6.5	7.79	9.85	9.63	13.81	8.93	17.87	6.01	17.5	0.658336	-0.603104	0.000554107	0.0489233	down	yes
MSTRG.12077	FADS3	MSTRG.12077.1;XM_018043057.1	GO:0005789(endoplasmic reticulum membrane);GO:0006633(fatty acid biosynthetic process);GO:0016021(integral component of membrane);GO:0016491(oxidoreductase activity);GO:0055114(oxidation-reduction process)	01212(Fatty acid metabolism);00592(alpha-Linolenic acid metabolism);01040(Biosynthesis of unsaturated fatty acids);03320(PPAR signaling pathway)	K10226	EC:1.14.19.3	PREDICTED: Capra hircus fatty acid desaturase 3 (FADS3), mRNA	14.43	10.46	13.59	12.87	12.82	12.69	11.5	20.49	20.82	0.819554	-0.287088	0.000776382	0.0556871	down	yes
MSTRG.12112		MSTRG.12112.1						3.32	8.8	8.44	3.49	2.8	4.24	3.4	3.94	3.82	1.65179	0.724027	0.00039801	0.0446387	up	yes
MSTRG.12113	LOC102174461	102174461						0.25	3.09	2.61	1.45	1.25	0.23	1.3	0.94	1.39	1.81018	0.85613	0.000586303	0.0506282	up	yes
MSTRG.12233	PDDC1	MSTRG.12233.1						0	0	20.75	0	39.74	0	25.75	0	42.47	0.240251	-2.05739	6.91391e-05	0.0317524	down	yes
MSTRG.12250	CDHR5	XM_018043027.1;XM_018043028.1;XM_018043029.1;XM_018043030.1;XM_018043032.1;XM_018043031.1	GO:0005509(calcium ion binding);GO:0005886(plasma membrane);GO:0007156(homophilic cell adhesion via plasma membrane adhesion molecules);GO:0008013(beta-catenin binding);GO:0016021(integral component of membrane);GO:0070062(extracellular exosome);GO:0070062(extracellular exosome)	04391(Hippo signaling pathway -fly);04391(Hippo signaling pathway -fly)	K16507		PREDICTED: Capra hircus cadherin related family member 5 (CDHR5), transcript variant X1, mRNA;PREDICTED: Capra hircus cadherin related family member 5 (CDHR5), transcript variant X2, mRNA;PREDICTED: Capra hircus cadherin related family member 5 (CDHR5), transcript variant X3, mRNA;PREDICTED: Capra hircus cadherin related family member 5 (CDHR5), transcript variant X4, mRNA;PREDICTED: Capra hircus…	1.12	3.95	8.77	4.83	1.86	4.7	11.43	11.88	10.18	0.582709	-0.779152	0.00105873	0.0644919	down	yes
MSTRG.12370	USP27X	XM_005700735.3	GO:0000124(SAGA complex);GO:0006355(regulation of transcription, DNA-templated);GO:0016578(histone deubiquitination)	04144(Endocytosis)	K11839	EC:3.4.19.12	PREDICTED: Capra hircus ubiquitin specific peptidase 27, X-linked (USP27X), mRNA	14.99	17.11	20.57	19.36	21.59	22.1	19.7	23.45	22.75	0.821585	-0.283518	0.00165393	0.079979	down	yes
MSTRG.12436	PRRG1	MSTRG.12436.1;XM_018043924.1;XR_001917575.1	GO:0005509(calcium ion binding);GO:0005576(extracellular region);GO:0016021(integral component of membrane);GO:0016021(integral component of membrane)				PREDICTED: Capra hircus proline rich and Gla domain 1 (PRRG1), transcript variant X1, mRNA;PREDICTED: Capra hircus proline rich and Gla domain 1 (PRRG1), transcript variant X2, misc_RNA	12.08	14.51	19.2	18.55	11.17	12.32	10.69	12.02	12.95	1.35968	0.443266	0.00114894	0.0660379	up	yes
MSTRG.12563	ACSL4	XM_018044177.1;MSTRG.12563.2	GO:0001676(long-chain fatty acid metabolic process);GO:0004467(long-chain fatty acid-CoA ligase activity);GO:0005739(mitochondrion);GO:0005811(lipid particle);GO:0008610(lipid biosynthetic process);GO:0016021(integral component of membrane);GO:0030182(neuron differentiation);GO:0030307(positive regulation of cell growth);GO:0031957(very long-chain fatty acid-CoA ligase activity);GO:0032307(negati…	01212(Fatty acid metabolism);00061(Fatty acid biosynthesis);00071(Fatty acid degradation);04146(Peroxisome);04920(Adipocytokine signaling pathway);03320(PPAR signaling pathway)	K01897	EC:6.2.1.3	PREDICTED: Capra hircus acyl-CoA synthetase long-chain family member 4 (ACSL4), mRNA	51.13	48.46	60.09	59.91	38.55	13.15	42.82	42.62	9.67	1.86968	0.90279	0.000283451	0.0371226	up	yes
MSTRG.12573	RNF128	XM_013976196.2;XM_018044229.1;MSTRG.12573.3;MSTRG.12573.5;MSTRG.12573.4;MSTRG.12573.7;MSTRG.12573.6	GO:0005770(late endosome);GO:0005783(endoplasmic reticulum);GO:0005794(Golgi apparatus);GO:0008270(zinc ion binding);GO:0016021(integral component of membrane);GO:0016567(protein ubiquitination);GO:0031647(regulation of protein stability);GO:0042036(negative regulation of cytokine biosynthetic process);GO:0061630(ubiquitin protein ligase activity);GO:0061630(ubiquitin protein ligase activity)				PREDICTED: Capra hircus ring finger protein 128, E3 ubiquitin protein ligase (RNF128), transcript variant X1, mRNA;PREDICTED: Capra hircus ring finger protein 128, E3 ubiquitin protein ligase (RNF128), transcript variant X2, mRNA	88.8	74.43	110.35	88.77	56.95	60.82	59.7	61.45	96.09	1.35201	0.435108	0.00225299	0.0944214	up	yes
MSTRG.12586	MUM1L1	XM_005700173.3;XM_013976182.2;XM_018044282.1	GO:0070062(extracellular exosome);GO:0070062(extracellular exosome)				PREDICTED: Capra hircus MUM1 like 1 (MUM1L1), transcript variant X1, mRNA;PREDICTED: Capra hircus MUM1 like 1 (MUM1L1), transcript variant X2, mRNA;PREDICTED: Capra hircus MUM1 like 1 (MUM1L1), transcript variant X3, mRNA	12.27	15.98	18.33	16.4	11.21	14.04	9.8	13.4	10.77	1.32937	0.410737	0.000212521	0.0352694	up	yes
MSTRG.12659	LOC102180758	XM_018044468.1;XM_018044469.1	GO:0006915(apoptotic process);GO:0016021(integral component of membrane);GO:0031966(mitochondrial membrane);GO:0031966(mitochondrial membrane)				PREDICTED: Capra hircus GRAM domain-containing protein 4 (LOC102180758), transcript variant X1, mRNA;PREDICTED: Capra hircus GRAM domain-containing protein 4 (LOC102180758), transcript variant X2, mRNA	2.16	0.85	4.41	3.74	3.53	1.03	1.76	4.24	0.92	1.21516	0.281142	0.00221057	0.0936422	up	yes
MSTRG.12710	MAMLD1	MSTRG.12710.1;MSTRG.12710.2;MSTRG.12710.3;MSTRG.12710.4;MSTRG.12710.5;MSTRG.12710.6;MSTRG.12710.7;MSTRG.12710.8;MSTRG.12710.9;XM_018044593.1;XM_018044594.1;XM_018044592.1	GO:0006357(regulation of transcription from RNA polymerase II promoter);GO:0008584(male gonad development);GO:0008584(male gonad development)	04142(Lysosome);04978(Mineral absorption);04330(Notch signaling pathway);04330(Notch signaling pathway)	K06061;K12347		PREDICTED: Capra hircus mastermind like domain containing 1 (MAMLD1), transcript variant X2, mRNA;PREDICTED: Capra hircus mastermind like domain containing 1 (MAMLD1), transcript variant X3, mRNA;PREDICTED: Capra hircus mastermind like domain containing 1 (MAMLD1), transcript variant X1, mRNA	63.85	55.27	337.7	121.72	106.97	108.14	101.76	53.56	53.04	1.70774	0.772085	0.000231607	0.0357238	up	yes
MSTRG.12780	DUSP9	MSTRG.12780.1						30.84	34.64	38.98	35.01	26.22	44.64	44.21	56.86	63.52	0.740444	-0.433538	0.00165955	0.0800048	down	yes
MSTRG.12830		MSTRG.12830.2;MSTRG.12830.1						0	13.5	11.35	9.81	1.36	12.2	13.27	0.55	8.35	1.21257	0.278064	0.00117565	0.0663393	up	yes
MSTRG.12877		MSTRG.12877.1						0	0.06	0.56	0.31	1.93	0.34	0.56	2.13	0.3	0.221008	-2.17783	0.000510048	0.0474315	down	yes
MSTRG.12946		MSTRG.12946.1						1.35	2.63	4.99	10.27	4.13	0	12.51	0.06	1.9	1.29301	0.370734	0.000417346	0.0448824	up	yes
MSTRG.12971		MSTRG.12971.1						0	8.01	11.01	7.36	0	7.39	9.56	0	3.11	1.64382	0.717051	0.000488795	0.0460584	up	yes
MSTRG.13036		MSTRG.13036.1						0	0.78	0.75	0.97	1.67	0.75	0.76	1.01	0.38	0.683807	-0.548338	0.00158709	0.0786837	down	yes
MSTRG.13105	LOC102184958	102184958;MSTRG.13105.2;MSTRG.13105.3						0.15	0	0	0	21.89	0.4	3.9	0	2.47	0.00654222	-7.256	0.000159022	0.034214	down	yes
MSTRG.1342	LOC102180934	MSTRG.1342.1						5.78	0.47	6.68	7.75	0.33	0.3	9.24	1.1	4.79	1.64023	0.713897	0.000387957	0.0440463	up	yes
MSTRG.1343	LOC102180934	XM_018045714.1	GO:0003924(GTPase activity);GO:0005525(GTP binding)				PREDICTED: Capra hircus guanylate-binding protein 6-like (LOC102180934), mRNA	1.21	0.03	1.13	1.86	0.17	0.13	2.23	0.21	0.95	1.43293	0.518965	0.000407041	0.044654	up	yes
MSTRG.1377	DPYD	MSTRG.1377.1						20.69	3.16	1.96	0.4	0.69	1.21	3.9	8.24	7.23	1.54031	0.623225	9.69156e-07	0.00179273	up	yes
MSTRG.1478	FAM46C	XM_018045973.1	GO:0005515(protein binding)	04810(Regulation of actin cytoskeleton);04260(Cardiac muscle contraction);04261(Adrenergic signaling in cardiomyocytes)	K05742		PREDICTED: Capra hircus family with sequence similarity 46 member C (FAM46C), mRNA	15.33	22.68	26.52	27.36	27.74	34.18	36.94	17.03	22.17	0.831975	-0.265388	0.000139685	0.034214	down	yes
MSTRG.1663		MSTRG.1663.1						4.31	4.58	6.61	3.18	2.41	3.12	4.04	3.99	2.47	1.45664	0.542648	0.00186535	0.086223	up	yes
MSTRG.1684	LOC102186539	XM_005677233.3;MSTRG.1684.2	GO:0001504(neurotransmitter uptake);GO:0002026(regulation of the force of heart contraction);GO:0002087(regulation of respiratory gaseous exchange by neurological system process);GO:0005391(sodium:potassium-exchanging ATPase activity);GO:0005524(ATP binding);GO:0005829(cytosol);GO:0005887(integral component of plasma membrane);GO:0005890(sodium:potassium-exchanging ATPase complex);GO:0006883(cell…	04024(cAMP signaling pathway);04022(cGMP - PKG signaling pathway);04911(Insulin secretion);04918(Thyroid hormone synthesis);04919(Thyroid hormone signaling pathway);04260(Cardiac muscle contraction);04261(Adrenergic signaling in cardiomyocytes);04970(Salivary secretion);04971(Gastric acid secretion);04972(Pancreatic secretion);04976(Bile secretion);04973(Carbohydrate digestion and absorption);049…	K01539	EC:3.6.3.9	PREDICTED: Capra hircus sodium/potassium-transporting ATPase subunit alpha-2 (LOC102186539), mRNA	21.69	21.33	22.09	23.37	13.61	10.88	12.04	20.89	14.82	1.53101	0.614482	0.000151859	0.034214	up	yes
MSTRG.1818		MSTRG.1818.1						0.11	0.14	0.09	0.17	0.04	0.47	0.29	1.12	0.29	0.288462	-1.79355	0.000224932	0.0357074	down	yes
MSTRG.1902	COPG2;LOC106502058	MSTRG.1902.1;MSTRG.1902.2;MSTRG.1902.3;MSTRG.1902.4;MSTRG.1902.6;MSTRG.1902.5;MSTRG.1902.7;MSTRG.1902.8;MSTRG.1902.9;MSTRG.1902.11;MSTRG.1902.10;MSTRG.1902.12;MSTRG.1902.13;MSTRG.1902.14;MSTRG.1902.15;MSTRG.1902.16;MSTRG.1902.17;MSTRG.1902.18;MSTRG.1902.19;MSTRG.1902.20;MSTRG.1902.21;MSTRG.1902.22;XR_001295625.2					PREDICTED: Capra hircus uncharacterized LOC106502058 (LOC106502058), ncRNA	18.05	7.81	10.36	6.93	11.87	9.64	13.42	21.31	20.44	0.70341	-0.507562	0.00130163	0.0704908	down	yes
MSTRG.1904	COPG2	MSTRG.1904.1;MSTRG.1904.2;MSTRG.1904.3;MSTRG.1904.5;MSTRG.1904.4;MSTRG.1904.7;MSTRG.1904.6						17.84	9.61	10.96	7.36	15.48	11.92	15.57	23.11	18.41	0.677151	-0.56245	0.000759584	0.0556871	down	yes
MSTRG.1946	SUGCT	MSTRG.1946.1						3.64	0.57	0.46	0.05	0.11	0.36	0.92	1.22	2.13	1.24473	0.315828	2.86657e-06	0.00346547	up	yes
MSTRG.2011	ELMO1	MSTRG.2011.1						5.18	0.61	0.38	0.05	0.15	0.28	1.15	1.14	1.96	1.66132	0.732334	5.92886e-06	0.00582362	up	yes
MSTRG.2092	ETV1	XM_013963162.2;XM_013963163.2;XM_013963164.2	GO:0000978(RNA polymerase II core promoter proximal region sequence-specific DNA binding);GO:0000981(RNA polymerase II transcription factor activity, sequence-specific DNA binding);GO:0001077(transcriptional activator activity, RNA polymerase II core promoter proximal region sequence-specific binding);GO:0005634(nucleus);GO:0006357(regulation of transcription from RNA polymerase II promoter);GO:0…	05202(Transcriptional misregulation in cancers);05202(Transcriptional misregulation in cancers)	K09431		PREDICTED: Capra hircus ETS variant 1 (ETV1), transcript variant X1, mRNA;PREDICTED: Capra hircus ETS variant 1 (ETV1), transcript variant X2, mRNA;PREDICTED: Capra hircus ETS variant 1 (ETV1), transcript variant X3, mRNA	9.5	3.7	4.03	4.83	3.64	1.51	1.13	0.78	4.31	2.42524	1.27813	0.00182383	0.0848503	up	yes
MSTRG.2135	ANKIB1	MSTRG.2135.1						8.42	2.06	0.75	0.1	0.08	0.56	1.55	3.14	4.97	1.375	0.459432	0.00178248	0.0838724	up	yes
MSTRG.2152	TMEM19	XM_005679719.3;XM_005679718.3;XM_013963638.2	GO:0016021(integral component of membrane);GO:0016021(integral component of membrane)	04974(Protein digestion and absorption);04974(Protein digestion and absorption)	K14211		PREDICTED: Capra hircus transmembrane protein 19 (TMEM19), transcript variant X2, mRNA;PREDICTED: Capra hircus transmembrane protein 19 (TMEM19), transcript variant X1, mRNA;PREDICTED: Capra hircus transmembrane protein 19 (TMEM19), transcript variant X3, mRNA	0.07	0.09	0.06	0.15	0.11	0.2	0.12	0.09	0.08	0.770833	-0.375509	0.000376475	0.0440416	down	yes
MSTRG.2279	TUBA1A	MSTRG.2279.1						0.01	15.95	7.37	3.89	0.04	3.9	0.01	0.36	1	6.40772	2.67981	0.000886017	0.059507	up	yes
MSTRG.2546	ITPR2	MSTRG.2546.1						13.26	3.38	1.35	0.25	0.39	0.79	2.67	5.48	7.02	1.3945	0.479743	0.000971861	0.0617468	up	yes
MSTRG.2556	GYS2	XM_005680786.3	GO:0004373(glycogen (starch) synthase activity);GO:0005978(glycogen biosynthetic process)	00500(Starch and sucrose metabolism);04151(PI3K-Akt signaling pathway);04152(AMPK signaling pathway);04910(Insulin signaling pathway);04922(Glucagon signaling pathway);04931(Insulin resistance)	K00693	EC:2.4.1.11	PREDICTED: Capra hircus glycogen synthase 2 (GYS2), mRNA	12.87	9.13	9.17	6.62	7.67	7.54	7.62	4.15	2	1.63	0.704875	0.0014771	0.076112	up	yes
MSTRG.264	KLHL24	XM_018047428.1;XM_018047438.1;XM_018047441.1;XM_018047435.1	GO:0004842(ubiquitin-protein transferase activity);GO:0031463(Cul3-RING ubiquitin ligase complex);GO:0031463(Cul3-RING ubiquitin ligase complex)	04120(Ubiquitin mediated proteolysis);04120(Ubiquitin mediated proteolysis)	K10447		PREDICTED: Capra hircus kelch like family member 24 (KLHL24), transcript variant X1, mRNA;PREDICTED: Capra hircus kelch like family member 24 (KLHL24), transcript variant X3, mRNA;PREDICTED: Capra hircus kelch like family member 24 (KLHL24), transcript variant X4, mRNA;PREDICTED: Capra hircus kelch like family member 24 (KLHL24), transcript variant X2, mRNA	2.9	0.14	0.13	0.13	0.13	0.2	0.17	2.01	0.06	1.60506	0.682626	3.0039e-07	0.000913204	up	yes
MSTRG.2729	GRAP2	XM_018048796.1	GO:0005654(nucleoplasm);GO:0005768(endosome)	04660(T cell receptor signaling pathway)	K07366		PREDICTED: Capra hircus GRB2-related adaptor protein 2 (GRAP2), mRNA	15.06	18.24	19.48	19.45	21.45	23.85	28.07	16.15	21.15	0.815826	-0.293666	0.00108287	0.0649556	down	yes
MSTRG.2755	MEI1	XM_005681120.2;MSTRG.2755.2	GO:0005623(cell);GO:0007127(meiosis I);GO:0007141(male meiosis I);GO:0007286(spermatid development);GO:0045141(meiotic telomere clustering)	03010(Ribosome)	K02866		PREDICTED: Capra hircus meiotic double-stranded break formation protein 1 (MEI1), mRNA	6.69	16.32	15.21	5.59	2.61	3.78	4.53	8.67	3.39	2.38305	1.25281	0.00195015	0.0888362	up	yes
MSTRG.3055	LOC102181854	XM_013964718.2	GO:0008201(heparin binding);GO:0016525(negative regulation of angiogenesis);GO:0019221(cytokine-mediated signaling pathway);GO:0030168(platelet activation);GO:0030595(leukocyte chemotaxis);GO:0030816(positive regulation of cAMP metabolic process);GO:0042127(regulation of cell proliferation);GO:0043950(positive regulation of cAMP-mediated signaling);GO:0045653(negative regulation of megakaryocyte …	04060(Cytokine-cytokine receptor interaction);04062(Chemokine signaling pathway)	K05407		PREDICTED: Capra hircus platelet factor 4 (LOC102181854), mRNA	101.1	176.73	302.69	289.12	401.92	251.35	445.21	177.26	347.18	0.669811	-0.578174	3.34042e-05	0.0218742	down	yes
MSTRG.332	IGSF10	XM_018048958.1;XM_005675436.3	GO:0001503(ossification);GO:0005576(extracellular region);GO:0007275(multicellular organism development);GO:0030154(cell differentiation);GO:0030154(cell differentiation)	04512(ECM-receptor interaction);04512(ECM-receptor interaction)	K06255		PREDICTED: Capra hircus immunoglobulin superfamily member 10 (IGSF10), transcript variant X1, mRNA;PREDICTED: Capra hircus immunoglobulin superfamily member 10 (IGSF10), transcript variant X4, mRNA	0.34	0.5	0.47	0.45	0.21	0.08	0.38	0.26	0.48	1.56028	0.641808	0.00182485	0.0848503	up	yes
MSTRG.3366	SEC24A	XM_018050374.1;XM_018050373.1;XM_018050375.1	GO:0000139(Golgi membrane);GO:0005789(endoplasmic reticulum membrane);GO:0006886(intracellular protein transport);GO:0006888(ER to Golgi vesicle-mediated transport);GO:0008270(zinc ion binding);GO:0030127(COPII vesicle coat);GO:0045714(regulation of low-density lipoprotein particle receptor biosynthetic process);GO:0048471(perinuclear region of cytoplasm);GO:0050714(positive regulation of protein…	04141(Protein processing in endoplasmic reticulum);04141(Protein processing in endoplasmic reticulum)	K14007		PREDICTED: Capra hircus SEC24 homolog A, COPII coat complex component (SEC24A), transcript variant X2, mRNA;PREDICTED: Capra hircus SEC24 homolog A, COPII coat complex component (SEC24A), transcript variant X1, mRNA;PREDICTED: Capra hircus SEC24 homolog A, COPII coat complex component (SEC24A), transcript variant X3, mRNA	2.05	2.12	2.72	2.6	0.26	0.24	0.26	1.75	0.18	4.40985	2.14073	0.000117504	0.0326183	up	yes
MSTRG.3633	CERS4	MSTRG.3633.1;MSTRG.3633.2;XM_013965209.2;XM_013965206.2;XM_018050985.1;XM_018050986.1	GO:0003677(DNA binding);GO:0005783(endoplasmic reticulum);GO:0005789(endoplasmic reticulum membrane);GO:0016021(integral component of membrane);GO:0031965(nuclear membrane);GO:0046513(ceramide biosynthetic process);GO:0050291(sphingosine N-acyltransferase activity);GO:0050291(sphingosine N-acyltransferase activity)	00600(Sphingolipid metabolism);04071(Sphingolipid signaling pathway);04071(Sphingolipid signaling pathway)	K04710	EC:2.3.1.24	PREDICTED: Capra hircus ceramide synthase 4 (CERS4), transcript variant X2, mRNA;PREDICTED: Capra hircus ceramide synthase 4 (CERS4), transcript variant X1, mRNA;PREDICTED: Capra hircus ceramide synthase 4 (CERS4), transcript variant X3, mRNA;PREDICTED: Capra hircus ceramide synthase 4 (CERS4), transcript variant X4, mRNA	16.82	14.97	21.39	17.79	42.84	21.09	24.03	15.54	25.57	0.687321	-0.540944	0.000470964	0.0451569	down	yes
MSTRG.3835	ISYNA1	MSTRG.3835.3;MSTRG.3835.1;MSTRG.3835.2;XM_018051437.1	GO:0004512(inositol-3-phosphate synthase activity);GO:0005737(cytoplasm);GO:0006021(inositol biosynthetic process);GO:0008654(phospholipid biosynthetic process)	00562(Inositol phosphate metabolism)	K01858	EC:5.5.1.4	PREDICTED: Capra hircus inositol-3-phosphate synthase 1 (ISYNA1), mRNA	156.03	167.52	117.07	132.2	105.69	101.93	107.79	120.04	125.1	1.27736	0.353167	0.000952394	0.061596	up	yes
MSTRG.3976	PTPRD	XM_018051970.1;XM_018051971.1;XM_018051972.1;XM_018051974.1;XM_018051975.1;XM_018051982.1	GO:0004725(protein tyrosine phosphatase activity);GO:0005102(receptor binding);GO:0007157(heterophilic cell-cell adhesion via plasma membrane cell adhesion molecules);GO:0016021(integral component of membrane);GO:0030182(neuron differentiation);GO:0035335(peptidyl-tyrosine dephosphorylation);GO:0046426(negative regulation of JAK-STAT cascade);GO:0050775(positive regulation of dendrite morphogenes…	04514(Cell adhesion molecules (CAMs));04520(Adherens junction);04910(Insulin signaling pathway);04931(Insulin resistance);04931(Insulin resistance)	K05695	EC:3.1.3.48	PREDICTED: Capra hircus protein tyrosine phosphatase, receptor type D (PTPRD), transcript variant X1, mRNA;PREDICTED: Capra hircus protein tyrosine phosphatase, receptor type D (PTPRD), transcript variant X2, mRNA;PREDICTED: Capra hircus protein tyrosine phosphatase, receptor type D (PTPRD), transcript variant X3, mRNA;PREDICTED: Capra hircus protein tyrosine phosphatase, receptor type D (PTPRD),…	3.78	0.63	2.66	2.29	1.22	2.84	2.49	1.15	0.48	1.43032	0.516336	0.00181757	0.0848503	up	yes
MSTRG.4006	ZFAND5	XM_018052070.1;XM_018052069.1;MSTRG.4006.2	GO:0001701(in utero embryonic development);GO:0001944(vasculature development);GO:0003016(respiratory system process);GO:0003677(DNA binding);GO:0008270(zinc ion binding);GO:0010761(fibroblast migration);GO:0048008(platelet-derived growth factor receptor signaling pathway);GO:0048705(skeletal system morphogenesis);GO:0048745(smooth muscle tissue development);GO:0060324(face development);GO:006032…				PREDICTED: Capra hircus zinc finger AN1-type containing 5 (ZFAND5), transcript variant X2, mRNA;PREDICTED: Capra hircus zinc finger AN1-type containing 5 (ZFAND5), transcript variant X1, mRNA	9.38	8.07	3.22	8.69	9.35	9.38	8.3	9.66	9.86	0.7884	-0.343001	0.000944604	0.0613446	down	yes
MSTRG.4040	HRCT1;LOC108636568	XM_005683859.3;MSTRG.4040.1;XR_001918450.1	GO:0005545(1-phosphatidylinositol binding);GO:0005886(plasma membrane);GO:0005905(clathrin-coated pit);GO:0007268(chemical synaptic transmission);GO:0030136(clathrin-coated vesicle);GO:0030276(clathrin binding);GO:0048268(clathrin coat assembly);GO:2000369(regulation of clathrin-mediated endocytosis)	04974(Protein digestion and absorption)	K14211		PREDICTED: Capra hircus histidine rich carboxyl terminus 1 (HRCT1), mRNA;PREDICTED: Capra hircus uncharacterized LOC108636568 (LOC108636568), ncRNA	10.65	13.62	12.79	13.01	11.47	12.81	3.05	13.55	10.98	1.20685	0.271252	0.00028221	0.0371226	up	yes
MSTRG.4058	TRMO;HEMGN	XM_013966054.2;XM_018052211.1;XM_013966050.2;MSTRG.4058.1;XM_013966051.2;MSTRG.4058.5;XM_018052210.1;MSTRG.4058.8;XM_005683904.2	GO:0016430(tRNA (adenine-N6-)-methyltransferase activity);GO:0030488(tRNA methylation);GO:0005654(nucleoplasm);GO:0030154(cell differentiation)				PREDICTED: Capra hircus tRNA methyltransferase O (TRMO), transcript variant X4, mRNA;PREDICTED: Capra hircus tRNA methyltransferase O (TRMO), transcript variant X5, mRNA;PREDICTED: Capra hircus tRNA methyltransferase O (TRMO), transcript variant X1, mRNA;PREDICTED: Capra hircus tRNA methyltransferase O (TRMO), transcript variant X2, mRNA;PREDICTED: Capra hircus tRNA methyltransferase O (TRMO), tr…	8.85	45.39	14.19	24.14	18.98	21.03	22.41	10.76	13.03	1.34222	0.424618	0.000188423	0.0344333	up	yes
MSTRG.4059	ANP32B	MSTRG.4059.1						1.76	4.1	19.3	41.78	19.5	22.67	58.84	12.36	2.52	0.722021	-0.469888	0.00011816	0.0326183	down	yes
MSTRG.438		MSTRG.438.1						1.16	2.63	8.15	1.36	6.83	3.22	5	3.23	9.44	0.599747	-0.737573	0.00111915	0.0660379	down	yes
MSTRG.4409	PLAGL1	XM_018053288.1;XM_018053292.1;MSTRG.4409.2;XM_018053290.1;XM_018053291.1;MSTRG.4409.1;XM_018053293.1;XM_018053294.1;XM_018053295.1;XM_018053296.1;XM_018053289.1	GO:0000977(RNA polymerase II regulatory region sequence-specific DNA binding);GO:0001228(transcriptional activator activity, RNA polymerase II transcription regulatory region sequence-specific binding);GO:0005654(nucleoplasm);GO:0005794(Golgi apparatus);GO:0006366(transcription from RNA polymerase II promoter);GO:0035914(skeletal muscle cell differentiation);GO:0045944(positive regulation of tran…	04722(Neurotrophin signaling pathway);03008(Ribosome biogenesis in eukaryotes);03008(Ribosome biogenesis in eukaryotes)	K12463;K14555		PREDICTED: Capra hircus PLAG1 like zinc finger 1 (PLAGL1), transcript variant X1, mRNA;PREDICTED: Capra hircus PLAG1 like zinc finger 1 (PLAGL1), transcript variant X5, mRNA;PREDICTED: Capra hircus PLAG1 like zinc finger 1 (PLAGL1), transcript variant X3, mRNA;PREDICTED: Capra hircus PLAG1 like zinc finger 1 (PLAGL1), transcript variant X4, mRNA;PREDICTED: Capra hircus PLAG1 like zinc finger 1 (P…	23.55	51.4	34.85	51.46	11.6	54.5	15.37	7.17	31.69	1.67518	0.74432	0.000350792	0.0417656	up	yes
MSTRG.4484	IGF2R	MSTRG.4484.1						27.13	34.46	33.07	26.7	22.65	22.7	19.22	20.83	24.95	1.37472	0.459134	0.000145612	0.034214	up	yes
MSTRG.4613	MPP5	XM_013967244.2;XM_018054053.1;XM_018054054.1;XM_018054052.1	GO:0002011(morphogenesis of an epithelial sheet);GO:0005654(nucleoplasm);GO:0005737(cytoplasm);GO:0005886(plasma membrane);GO:0019904(protein domain specific binding);GO:0032287(peripheral nervous system myelin maintenance);GO:0035749(myelin sheath adaxonal region);GO:0035750(protein localization to myelin sheath abaxonal region);GO:0043219(lateral loop);GO:0043220(Schmidt-Lanterman incisure);GO:…	04390(Hippo signaling pathway);04530(Tight junction);04530(Tight junction)	K06091		PREDICTED: Capra hircus membrane palmitoylated protein 5 (MPP5), transcript variant X4, mRNA;PREDICTED: Capra hircus membrane palmitoylated protein 5 (MPP5), transcript variant X2, mRNA;PREDICTED: Capra hircus membrane palmitoylated protein 5 (MPP5), transcript variant X3, mRNA;PREDICTED: Capra hircus membrane palmitoylated protein 5 (MPP5), transcript variant X1, mRNA	2.92	2.55	0.23	3.51	0.13	2.91	0.22	0.11	0.09	3.32731	1.73436	1.97746e-07	0.000776942	up	yes
MSTRG.478	S100B	XM_005675677.3	GO:0001726(ruffle);GO:0005509(calcium ion binding);GO:0005515(protein binding);GO:0005576(extracellular region);GO:0005615(extracellular space);GO:0005634(nucleus);GO:0005737(cytoplasm);GO:0007409(axonogenesis);GO:0007417(central nervous system development);GO:0007611(learning or memory);GO:0007613(memory);GO:0008270(zinc ion binding);GO:0008283(cell proliferation);GO:0008284(positive regulation …				PREDICTED: Capra hircus S100 calcium binding protein B (S100B), mRNA	3.45	2.24	8.95	6.3	6.89	9.18	6.38	5.16	4.69	0.810372	-0.303345	1.10534e-06	0.00179273	down	yes
MSTRG.4838	GPR176	XM_018054470.1	GO:0004930(G-protein coupled receptor activity);GO:0007186(G-protein coupled receptor signaling pathway);GO:0016021(integral component of membrane)	04080(Neuroactive ligand-receptor interaction)	K04239		PREDICTED: Capra hircus G protein-coupled receptor 176 (GPR176), mRNA	5.06	4.98	4.25	3.62	3.41	5.22	3.43	3.48	1.52	1.31228	0.392076	0.00229019	0.0954711	up	yes
MSTRG.496		MSTRG.496.1						0.74	0.02	0.01	0.08	0.08	0.67	0.46	0.03	0.15	0.764388	-0.387622	0.00175976	0.083052	down	yes
MSTRG.5220	MCFD2	MSTRG.5220.1;XM_005686571.3;XM_005686572.3;MSTRG.5220.4	GO:0005509(calcium ion binding);GO:0005509(calcium ion binding)				PREDICTED: Capra hircus multiple coagulation factor deficiency 2 (MCFD2), transcript variant X2, mRNA;PREDICTED: Capra hircus multiple coagulation factor deficiency 2 (MCFD2), transcript variant X1, mRNA	10.86	16.94	5.19	8.23	5.76	18.03	18.19	14.41	16.67	0.705242	-0.503809	0.0015362	0.0774308	down	yes
MSTRG.5419	UBXN2A	XM_018055584.1;XM_018055585.1	GO:0005634(nucleus);GO:0005783(endoplasmic reticulum);GO:0005801(cis-Golgi network);GO:0005829(cytosol);GO:0007030(Golgi organization);GO:0031396(regulation of protein ubiquitination);GO:0031468(nuclear envelope reassembly);GO:0033130(acetylcholine receptor binding);GO:0042176(regulation of protein catabolic process);GO:0043130(ubiquitin binding);GO:0043161(proteasome-mediated ubiquitin-dependent…	04141(Protein processing in endoplasmic reticulum);04141(Protein processing in endoplasmic reticulum)	K14012		PREDICTED: Capra hircus UBX domain protein 2A (UBXN2A), transcript variant X1, mRNA;PREDICTED: Capra hircus UBX domain protein 2A (UBXN2A), transcript variant X2, mRNA	7.23	9.01	11.49	9.95	0.86	0.9	7.14	7.88	7.6	1.93191	0.950029	1.33046e-05	0.0116164	up	yes
MSTRG.5578	UBAC1	XM_018056078.1;XM_018056077.1	GO:0005794(Golgi apparatus);GO:0005886(plasma membrane);GO:0070062(extracellular exosome);GO:0070062(extracellular exosome)				PREDICTED: Capra hircus UBA domain containing 1 (UBAC1), transcript variant X2, mRNA;PREDICTED: Capra hircus UBA domain containing 1 (UBAC1), transcript variant X1, mRNA	147.89	197.32	191.98	207.88	218.51	242.38	264.36	167.28	243.28	0.819976	-0.286346	0.000794169	0.0559694	down	yes
MSTRG.561	LOC102188098	XM_018055348.1;MSTRG.561.2;MSTRG.561.3	GO:0004252(serine-type endopeptidase activity);GO:0005615(extracellular space);GO:0006508(proteolysis);GO:0007586(digestion)	04972(Pancreatic secretion);04974(Protein digestion and absorption)	K01345	EC:3.4.21.70	PREDICTED: Capra hircus proproteinase E (LOC102188098), mRNA	60.11	40.33	46.85	45.78	39.37	37.83	34.2	32.16	55.41	1.21293	0.278501	4.19764e-05	0.0253731	up	yes
MSTRG.5696	LOC102173859	XM_018056299.1;MSTRG.5696.2;MSTRG.5696.3;MSTRG.5696.4;MSTRG.5696.5	GO:0005524(ATP binding);GO:0016021(integral component of membrane);GO:0042626(ATPase activity, coupled to transmembrane movement of substances);GO:0055085(transmembrane transport)	02010(ABC transporters);04024(cAMP signaling pathway);04976(Bile secretion)	K05673		PREDICTED: Capra hircus multidrug resistance-associated protein 4-like (LOC102173859), mRNA	7.12	8.77	12.42	9.95	5.62	6.7	7.98	1.31	3	1.94332	0.95852	5.85272e-05	0.0296714	up	yes
MSTRG.5715		MSTRG.5715.1						0.08	0	0.31	0.1	2.84	0	0.93	2.33	0.67	0.0904727	-3.46637	6.15961e-05	0.0301106	down	yes
MSTRG.5849	RGCC	XM_018056796.1	GO:0001100(negative regulation of exit from mitosis);GO:0001937(negative regulation of endothelial cell proliferation);GO:0003331(positive regulation of extracellular matrix constituent secretion);GO:0005634(nucleus);GO:0005737(cytoplasm);GO:0005813(centrosome);GO:0006956(complement activation);GO:0010718(positive regulation of epithelial to mesenchymal transition);GO:0016525(negative regulation …				PREDICTED: Capra hircus regulator of cell cycle (RGCC), mRNA	34.61	39.74	37.5	44.46	58.49	62.68	66.79	35.69	56.92	0.696395	-0.522023	0.00209905	0.0926649	down	yes
MSTRG.5859	PLCB1	MSTRG.5859.1						11.11	1.75	0.72	0.23	0.46	0.35	2.22	2.86	3.64	1.81139	0.857093	0.000223372	0.0357074	up	yes
MSTRG.5860	PLCB1	MSTRG.5860.1						6.99	1.08	0.42	0.35	0.3	0.5	0.55	1.55	1.66	2.42325	1.27694	0.00102638	0.06401	up	yes
MSTRG.6054		MSTRG.6054.1;MSTRG.6054.2;MSTRG.6054.3						15.57	12.31	17.66	29.02	26.33	21.14	21.53	32.92	18.7	0.772675	-0.372067	0.0013756	0.0730369	down	yes
MSTRG.6100	TUBB1	MSTRG.6100.1;MSTRG.6100.2;MSTRG.6100.3;XM_005688299.3;XM_018057608.1	GO:0003924(GTPase activity);GO:0005200(structural constituent of cytoskeleton);GO:0005525(GTP binding);GO:0005737(cytoplasm);GO:0005874(microtubule);GO:0051225(spindle assembly);GO:0070062(extracellular exosome);GO:0070062(extracellular exosome)	04145(Phagosome);04540(Gap junction);04540(Gap junction)	K07375		PREDICTED: Capra hircus tubulin beta 1 class VI (TUBB1), transcript variant X2, mRNA;PREDICTED: Capra hircus tubulin beta 1 class VI (TUBB1), transcript variant X1, mRNA	4.95	6.79	9.86	8.92	12.32	8.09	13.7	7.67	14.27	0.680642	-0.555031	0.000433872	0.0451569	down	yes
MSTRG.6139	TTLL9	XM_005688368.2;MSTRG.6139.2	GO:0005524(ATP binding);GO:0005737(cytoplasm);GO:0005874(microtubule);GO:0005929(cilium);GO:0006464(cellular protein modification process);GO:0016874(ligase activity)				PREDICTED: Capra hircus tubulin tyrosine ligase like 9 (TTLL9), mRNA	0.28	0.37	8.12	9.93	11.56	0.63	0.56	0.28	0.36	1.74571	0.80381	0.000213197	0.0352694	up	yes
MSTRG.6155	BPIFA2;LOC108637355	XM_005688464.3;MSTRG.6155.2;108637355	GO:0005576(extracellular region);GO:0008289(lipid binding)				PREDICTED: Capra hircus BPI fold containing family A member 2 (BPIFA2), mRNA	0.32	0.41	3.56	1.34	0.75	2.89	0.53	7.3	3.17	0.480704	-1.05678	0.00184557	0.0855606	down	yes
MSTRG.6163	LOC102170799	MSTRG.6163.1;XM_018056867.1	GO:0008289(lipid binding)				PREDICTED: Capra hircus short palate, lung and nasal epithelium carcinoma-associated protein 2B-like (LOC102170799), mRNA	1.74	0.59	39.97	18.91	14.45	24.64	3.38	30.69	22.99	0.795762	-0.329591	0.00147442	0.076112	down	yes
MSTRG.6262	LOC102177641	XM_005688601.3	GO:0004867(serine-type endopeptidase inhibitor activity);GO:0010951(negative regulation of endopeptidase activity)	04610(Complement and coagulation cascades)	K03909		PREDICTED: Capra hircus spleen trypsin inhibitor I (LOC102177641), mRNA	70.27	144.4	180.6	149.58	260.12	150.23	267.3	118.57	188.46	0.691659	-0.531868	8.09451e-05	0.0317524	down	yes
MSTRG.64	CLIC6	XM_013964117.2	GO:0004364(glutathione transferase activity);GO:0005244(voltage-gated ion channel activity);GO:0005254(chloride channel activity);GO:0005634(nucleus);GO:0005737(cytoplasm);GO:0006749(glutathione metabolic process);GO:0034707(chloride channel complex);GO:0034765(regulation of ion transmembrane transport);GO:0050780(dopamine receptor binding);GO:0070062(extracellular exosome);GO:1902476(chloride tr…				PREDICTED: Capra hircus chloride intracellular channel 6 (CLIC6), mRNA	1.39	2.06	4.82	0.99	3.1	3.65	1.81	5.27	9.89	0.487985	-1.03509	5.56197e-06	0.00582362	down	yes
MSTRG.664	COL16A1	XM_018057501.1;XM_018057459.1;XM_018057493.1;XM_018057511.1;XM_018057521.1;XM_018057449.1;XM_018057468.1;XM_018057478.1;XM_018057487.1;MSTRG.664.11;MSTRG.664.10	GO:0005178(integrin binding);GO:0005515(protein binding);GO:0005576(extracellular region);GO:0005578(proteinaceous extracellular matrix);GO:0005597(collagen type XVI trimer);GO:0005788(endoplasmic reticulum lumen);GO:0007155(cell adhesion);GO:0007229(integrin-mediated signaling pathway);GO:0007565(female pregnancy);GO:0030198(extracellular matrix organization);GO:0033622(integrin activation);GO:0…	04512(ECM-receptor interaction);04510(Focal adhesion);04974(Protein digestion and absorption);04933(AGE-RAGE signaling pathway in diabetic complications);04933(AGE-RAGE signaling pathway in diabetic complications)	K06237;K16630;K08131		PREDICTED: Capra hircus collagen type XVI alpha 1 chain (COL16A1), transcript variant X7, mRNA;PREDICTED: Capra hircus collagen type XVI alpha 1 chain (COL16A1), transcript variant X2, mRNA;PREDICTED: Capra hircus collagen type XVI alpha 1 chain (COL16A1), transcript variant X6, mRNA;PREDICTED: Capra hircus collagen type XVI alpha 1 chain (COL16A1), transcript variant X8, mRNA;PREDICTED: Capra hi…	26.89	22.52	21.88	21.69	3.92	14.44	15.81	12.73	8.67	2.09151	1.06454	0.000837547	0.0570517	up	yes
MSTRG.6646	MDK	XM_018059159.1;XM_018059158.1;MSTRG.6646.3;MSTRG.6646.4	GO:0001662(behavioral fear response);GO:0005576(extracellular region);GO:0005737(cytoplasm);GO:0007614(short-term memory);GO:0008083(growth factor activity);GO:0008201(heparin binding);GO:0009611(response to wounding);GO:0009725(response to hormone);GO:0016477(cell migration);GO:0021542(dentate gyrus development);GO:0021681(cerebellar granular layer development);GO:0021766(hippocampus development…				PREDICTED: Capra hircus midkine (neurite growth-promoting factor 2) (MDK), transcript variant X2, mRNA;PREDICTED: Capra hircus midkine (neurite growth-promoting factor 2) (MDK), transcript variant X1, mRNA	38.21	59.28	69.82	60.07	25.35	55.43	40.51	44.32	64.58	1.23474	0.304208	0.00245318	0.099111	up	yes
MSTRG.6785	LOC102175876	XM_005689815.3	GO:0005344(oxygen transporter activity);GO:0005506(iron ion binding);GO:0005833(hemoglobin complex);GO:0015671(oxygen transport);GO:0019825(oxygen binding);GO:0020037(heme binding)	05144(Malaria);05143(African trypanosomiasis)	K13823		PREDICTED: Capra hircus hemoglobin subunit beta-A-like (LOC102175876), mRNA	503.11	525.74	354.58	273.34	373.81	311.58	461.84	424.43	105.17	1.23505	0.304565	0.00139315	0.0732267	up	yes
MSTRG.6811	PPFIBP2	XM_005689726.3;XM_005689727.3	GO:0005615(extracellular space);GO:0003674(molecular_function);GO:0005622(intracellular);GO:0005622(intracellular)	04530(Tight junction);04530(Tight junction)	K10352		PREDICTED: Capra hircus PPFIA binding protein 2 (PPFIBP2), transcript variant X1, mRNA;PREDICTED: Capra hircus PPFIA binding protein 2 (PPFIBP2), transcript variant X2, mRNA	5.85	10.03	4.65	7.52	4.25	4.96	5.57	10.65	2.09	1.27407	0.349448	0.000976313	0.0617468	up	yes
MSTRG.7073	LBR	MSTRG.7073.1;XM_018060210.1	GO:0005639(integral component of nuclear inner membrane);GO:0016126(sterol biosynthetic process);GO:0016627(oxidoreductase activity, acting on the CH-CH group of donors);GO:0016628(oxidoreductase activity, acting on the CH-CH group of donors, NAD or NADP as acceptor);GO:0030176(integral component of endoplasmic reticulum membrane);GO:0044822(poly(A) RNA binding);GO:0055114(oxidation-reduction pro…	00100(Steroid biosynthesis)	K00222	EC:1.3.1.70	PREDICTED: Capra hircus lamin B receptor (LBR), mRNA	21.88	22.71	25.94	18.4	13.64	18.13	18.19	19.32	22.96	1.20514	0.269206	0.00206822	0.0920798	up	yes
MSTRG.7101	KMO	MSTRG.7101.1						5.76	0.36	0.39	0.03	0	0.1	0.23	0.83	0.67	4.46721	2.15938	0.00240424	0.0981428	up	yes
MSTRG.716	SLC19A3	XM_005676643.3;XM_005676642.3	GO:0005887(integral component of plasma membrane);GO:0015403(thiamine uptake transmembrane transporter activity);GO:0071934(thiamine transmembrane transport);GO:0071934(thiamine transmembrane transport)	04977(Vitamin digestion and absorption);04977(Vitamin digestion and absorption)	K14610		PREDICTED: Capra hircus solute carrier family 19 member 3 (SLC19A3), transcript variant X2, mRNA;PREDICTED: Capra hircus solute carrier family 19 member 3 (SLC19A3), transcript variant X1, mRNA	0.89	0.76	0.89	0.65	0.36	0.51	0.26	1.27	0.82	1.23835	0.308424	0.00166769	0.0801513	up	yes
MSTRG.7161	LOC102178379	XM_018060391.1	GO:0016324(apical plasma membrane);GO:0071332(cellular response to fructose stimulus)	04973(Carbohydrate digestion and absorption)	K08143		PREDICTED: Capra hircus solute carrier family 2, facilitated glucose transporter member 5 (LOC102178379), mRNA	22.64	6.69	25.74	7.58	10.52	8.72	10.23	12.93	7.02	1.58463	0.664148	0.000178566	0.034214	up	yes
MSTRG.717		MSTRG.717.1						1.72	1.14	0.3	0.92	0.17	0.59	0	1.37	0.99	1.63462	0.708951	9.23576e-05	0.0317524	up	yes
MSTRG.7321		MSTRG.7321.1						0	11.34	9.16	8.76	10.48	0	0	0	9.87	1.7973	0.845829	8.90932e-05	0.0317524	up	yes
MSTRG.7445	CRYBA4	XM_018061270.1;MSTRG.7445.1	GO:0005212(structural constituent of eye lens)				PREDICTED: Capra hircus crystallin beta A4 (CRYBA4), mRNA	2.09	7.98	6.72	3.8	4.78	11.65	7.25	5.33	4.7	0.763497	-0.389305	0.00205875	0.0920798	down	yes
MSTRG.7491	PLA2G1B	MSTRG.7491.1						4.19	0.99	8.84	8.06	3.04	1.86	10.02	1.28	0.86	1.61782	0.694051	0.000706381	0.0536303	up	yes
MSTRG.763	PLCD4	XM_013972683.2;XR_001919227.1	GO:0004435(phosphatidylinositol phospholipase C activity);GO:0004871(signal transducer activity);GO:0005509(calcium ion binding);GO:0005634(nucleus);GO:0005783(endoplasmic reticulum);GO:0007340(acrosome reaction);GO:0016020(membrane);GO:0016042(lipid catabolic process);GO:0035556(intracellular signal transduction);GO:0046488(phosphatidylinositol metabolic process);GO:0046488(phosphatidylinositol …	00562(Inositol phosphate metabolism);04020(Calcium signaling pathway);04070(Phosphatidylinositol signaling system);04919(Thyroid hormone signaling pathway);04933(AGE-RAGE signaling pathway in diabetic complications);04933(AGE-RAGE signaling pathway in diabetic complications)	K05857	EC:3.1.4.11	PREDICTED: Capra hircus phospholipase C delta 4 (PLCD4), transcript variant X1, mRNA;PREDICTED: Capra hircus phospholipase C delta 4 (PLCD4), transcript variant X2, misc_RNA	0.4	0.48	0.41	0.3	0.46	0.42	0.24	0.81	0.55	0.801411	-0.319385	0.00148606	0.0763231	down	yes
MSTRG.7679	LOC106503014	MSTRG.7679.1;XR_001296694.2;MSTRG.7679.3;MSTRG.7679.2					PREDICTED: Capra hircus uncharacterized LOC106503014 (LOC106503014), ncRNA	21.49	31.27	33.13	25.11	21.58	23.95	22.77	20.17	22.05	1.25543	0.32818	0.000689166	0.0530881	up	yes
MSTRG.7843	TOX3	XM_018061931.1;XM_018061930.1	GO:0003682(chromatin binding);GO:0034056(estrogen response element binding);GO:0042803(protein homodimerization activity);GO:0043524(negative regulation of neuron apoptotic process);GO:0045893(positive regulation of transcription, DNA-templated);GO:0051219(phosphoprotein binding);GO:0051219(phosphoprotein binding)				PREDICTED: Capra hircus TOX high mobility group box family member 3 (TOX3), transcript variant X2, mRNA;PREDICTED: Capra hircus TOX high mobility group box family member 3 (TOX3), transcript variant X1, mRNA	7.41	7.88	7.62	8.12	4.19	5.46	5.71	8.92	5.49	1.30291	0.381733	0.000521573	0.0482179	up	yes
MSTRG.8378	LOC102184243	MSTRG.8378.2;MSTRG.8378.1;XM_018063222.1;MSTRG.8378.4	GO:0000064(L-ornithine transmembrane transporter activity);GO:0005887(integral component of plasma membrane);GO:0015181(arginine transmembrane transporter activity);GO:0015189(L-lysine transmembrane transporter activity);GO:0015297(antiporter activity);GO:1903352(L-ornithine transmembrane transport);GO:1903401(L-lysine transmembrane transport)	05206(MicroRNAs in cancer)	K13863		PREDICTED: Capra hircus cationic amino acid transporter 3 (LOC102184243), mRNA	12.82	9.29	5.86	7.92	11.89	10.26	11.98	17.47	14.15	0.682319	-0.551481	0.000920082	0.0605021	down	yes
MSTRG.8402	LOC102173498	MSTRG.8402.1;MSTRG.8402.2;MSTRG.8402.3;XM_018063229.1	GO:0000064(L-ornithine transmembrane transporter activity);GO:0005887(integral component of plasma membrane);GO:0015181(arginine transmembrane transporter activity);GO:0015189(L-lysine transmembrane transporter activity);GO:0015297(antiporter activity);GO:1903352(L-ornithine transmembrane transport);GO:1903401(L-lysine transmembrane transport)	05206(MicroRNAs in cancer)	K13863		PREDICTED: Capra hircus cationic amino acid transporter 3-like (LOC102173498), mRNA	3.92	20.2	25.79	15.83	18.08	19.51	27.15	18.68	21.74	0.781428	-0.355815	0.000629161	0.0512014	down	yes
MSTRG.8406	LOC102174869	MSTRG.8406.1;XM_013971637.2	GO:0000064(L-ornithine transmembrane transporter activity);GO:0005887(integral component of plasma membrane);GO:0015181(arginine transmembrane transporter activity);GO:0015189(L-lysine transmembrane transporter activity);GO:0015297(antiporter activity);GO:1903352(L-ornithine transmembrane transport);GO:1903401(L-lysine transmembrane transport)	05206(MicroRNAs in cancer)	K13863		PREDICTED: Capra hircus cationic amino acid transporter 3-like (LOC102174869), mRNA	4.1	5.97	10.93	14.64	15.28	11.45	17.95	4.2	7.91	0.784469	-0.350211	0.00160262	0.0789553	down	yes
MSTRG.8434	GP6	XM_005692977.2	GO:0009986(cell surface);GO:0070062(extracellular exosome);GO:0097197(tetraspanin-enriched microdomain)	04512(ECM-receptor interaction);04611(Platelet activation)	K06264		PREDICTED: Capra hircus glycoprotein VI platelet (GP6), mRNA	0.66	1.09	1.41	1.41	2.37	1.45	1.95	1.62	1.97	0.61031	-0.712386	0.000692483	0.0530881	down	yes
MSTRG.8435	GP6	MSTRG.8435.1						4.64	3.66	5.67	5.92	6.98	4.37	7.47	8.94	9.61	0.665306	-0.587909	0.00242453	0.0984597	down	yes
MSTRG.8464	LOC102172380;LOC108638100	MSTRG.8464.2;XM_018063496.1;MSTRG.8464.1;XM_018063253.1					PREDICTED: Capra hircus uncharacterized LOC102172380 (LOC102172380), mRNA;PREDICTED: Capra hircus collagen alpha-1(I) chain-like (LOC108638100), mRNA	99.28	56.38	105.3	55.32	96.41	89.88	92.68	110.39	87.36	0.829313	-0.270012	0.00105761	0.0644919	down	yes
MSTRG.8465	LOC108638100	MSTRG.8465.1						5.95	1.89	15.45	0.88	12.65	18.17	3.88	20.48	10.61	0.459226	-1.12272	0.000449171	0.0451569	down	yes
MSTRG.8466	PEG3	MSTRG.8466.3;MSTRG.8466.10;XM_018063410.1;MSTRG.8466.7;MSTRG.8466.11;MSTRG.8466.5;MSTRG.8466.1;MSTRG.8466.2;MSTRG.8466.4;MSTRG.8466.6;MSTRG.8466.8;MSTRG.8466.9;XM_018063405.1;XM_018063406.1;XM_018063407.1;XM_018063408.1;XM_018063409.1;MSTRG.8466.19;MSTRG.8466.20;MSTRG.8466.18;MSTRG.8466.21;MSTRG.8466.22	GO:0000981(RNA polymerase II transcription factor activity, sequence-specific DNA binding);GO:0005634(nucleus);GO:0005634(nucleus)	04722(Neurotrophin signaling pathway);04974(Protein digestion and absorption);04974(Protein digestion and absorption)	K19721;K12458		PREDICTED: Capra hircus paternally expressed 3 (PEG3), transcript variant X6, mRNA;PREDICTED: Capra hircus paternally expressed 3 (PEG3), transcript variant X1, mRNA;PREDICTED: Capra hircus paternally expressed 3 (PEG3), transcript variant X2, mRNA;PREDICTED: Capra hircus paternally expressed 3 (PEG3), transcript variant X3, mRNA;PREDICTED: Capra hircus paternally expressed 3 (PEG3), transcript v…	74.58	189.36	137.32	90.88	100.65	199.52	177.59	104.4	171	0.816792	-0.29196	0.000779969	0.0556871	down	yes
MSTRG.8580	SLFN14	XM_005693334.2;MSTRG.8580.2	GO:0005524(ATP binding)				PREDICTED: Capra hircus schlafen family member 14 (SLFN14), mRNA	7.6	9.32	9.93	8.04	7.42	2.83	9.25	7.99	7.31	1.25323	0.325654	0.000185786	0.0344333	up	yes
MSTRG.8608	LOC102187672;LOC102189615	MSTRG.8608.1;MSTRG.8608.2;MSTRG.8608.3;MSTRG.8608.6;MSTRG.8608.5;MSTRG.8608.4;MSTRG.8608.7;MSTRG.8608.8						49.23	53.89	57.31	43.3	29.39	34.54	42.29	45.4	27.67	1.42039	0.506292	0.000471106	0.0451569	up	yes
MSTRG.8609	LOC102189615	MSTRG.8609.1						12.73	33.15	31.84	28.91	12.84	19.08	22.5	17.42	21.48	1.42828	0.514283	0.000312805	0.0396455	up	yes
MSTRG.8610	LOC102189615	MSTRG.8610.1						67.29	58.39	63.2	50.9	78.02	62.35	121.3	76.83	154.34	0.608159	-0.71748	0.000530435	0.0483381	down	yes
MSTRG.8661	SSH2	MSTRG.8661.1						9.38	1.79	1.14	0.17	0.67	1.14	1.96	4.61	3.18	1.34948	0.432405	0.00215517	0.0934875	up	yes
MSTRG.8663	SLC6A4	MSTRG.8663.1						2.14	7.34	9.21	6.07	6.74	6.88	7.52	7.1	10.58	0.797269	-0.326861	0.00140313	0.0735052	down	yes
MSTRG.8698	SRR	XM_005693324.3;XM_013971875.2;XM_013971874.2	GO:0000287(magnesium ion binding);GO:0003941(L-serine ammonia-lyase activity);GO:0005509(calcium ion binding);GO:0005524(ATP binding);GO:0005737(cytoplasm);GO:0006563(L-serine metabolic process);GO:0007420(brain development);GO:0008721(D-serine ammonia-lyase activity);GO:0016594(glycine binding);GO:0018114(threonine racemase activity);GO:0030165(PDZ domain binding);GO:0030170(pyridoxal phosphate …	00260(Glycine, serine and threonine metabolism);00260(Glycine, serine and threonine metabolism)	K12235	EC:5.1.1.18	PREDICTED: Capra hircus serine racemase (SRR), transcript variant X2, mRNA;PREDICTED: Capra hircus serine racemase (SRR), transcript variant X3, mRNA;PREDICTED: Capra hircus serine racemase (SRR), transcript variant X1, mRNA	17.23	17.99	17.56	27.07	17.39	15.2	16.19	13.75	17.58	1.24594	0.317238	0.000253501	0.035892	up	yes
MSTRG.9086	LOC102178567	MSTRG.9086.1						5.12	5.9	6.94	5.42	17.17	5.88	4.44	14.03	3.19	0.653657	-0.613395	0.00113848	0.0660379	down	yes
MSTRG.9181	LOC108638192	XR_001919618.1;XR_001919617.1;XR_001919616.1;XR_001919619.1					PREDICTED: Capra hircus uncharacterized LOC108638192 (LOC108638192), transcript variant X3, ncRNA;PREDICTED: Capra hircus uncharacterized LOC108638192 (LOC108638192), transcript variant X2, ncRNA;PREDICTED: Capra hircus uncharacterized LOC108638192 (LOC108638192), transcript variant X1, ncRNA;PREDICTED: Capra hircus uncharacterized LOC108638192 (LOC108638192), transcript variant X4, ncRNA	7.02	6.62	8.05	7.99	20.26	7.42	9.13	8.07	4.04	0.758381	-0.399005	0.000626677	0.0512014	down	yes
MSTRG.9194		MSTRG.9194.1						6.49	1.83	3.58	4.54	4.79	1.68	1.58	3.05	1.52	1.62837	0.703426	0.000669219	0.0525299	up	yes
MSTRG.9209	QRICH2	XM_018064022.1;MSTRG.9209.2	GO:0003674(molecular_function);GO:0005575(cellular_component);GO:0008150(biological_process)	04810(Regulation of actin cytoskeleton);04510(Focal adhesion);04270(Vascular smooth muscle contraction)	K06270		PREDICTED: Capra hircus glutamine rich 2 (QRICH2), mRNA	3.57	3.98	4.88	4.59	4.05	3.76	2.75	4.38	2.6	1.21294	0.27851	0.000233955	0.0357238	up	yes
MSTRG.922	SLC38A11	MSTRG.922.1;XM_005676034.2	GO:0003333(amino acid transmembrane transport);GO:0005783(endoplasmic reticulum);GO:0006814(sodium ion transport);GO:0015171(amino acid transmembrane transporter activity);GO:0016021(integral component of membrane)				PREDICTED: Capra hircus solute carrier family 38 member 11 (SLC38A11), mRNA	8.25	10.04	10.56	7.57	6.33	5.94	7.14	8.25	6.91	1.31689	0.397138	0.000466603	0.0451569	up	yes
MSTRG.9239	LOC108638196	MSTRG.9239.1;XR_001919634.1					PREDICTED: Capra hircus uncharacterized LOC108638196 (LOC108638196), ncRNA	2.92	2.18	1.76	1.93	5.43	2.48	1.73	2.19	2.78	0.752053	-0.411093	0.000998894	0.0625443	down	yes
MSTRG.926	LRP2	XM_018064156.1;XM_018064165.1	GO:0003281(ventricular septum development);GO:0005509(calcium ion binding);GO:0005765(lysosomal membrane);GO:0005768(endosome);GO:0005783(endoplasmic reticulum);GO:0005794(Golgi apparatus);GO:0005905(clathrin-coated pit);GO:0006766(vitamin metabolic process);GO:0006898(receptor-mediated endocytosis);GO:0008283(cell proliferation);GO:0016021(integral component of membrane);GO:0016324(apical plasma…	04340(Hedgehog signaling pathway);04918(Thyroid hormone synthesis);04918(Thyroid hormone synthesis)	K06233		PREDICTED: Capra hircus LDL receptor related protein 2 (LRP2), transcript variant X1, mRNA;PREDICTED: Capra hircus LDL receptor related protein 2 (LRP2), transcript variant X2, mRNA	1.07	0.99	1.92	1.58	1.05	1.43	1.44	1.09	0.55	1.25	0.321928	0.000964078	0.0617468	up	yes
MSTRG.9459		MSTRG.9459.1						0.21	0.15	0.39	0.04	0.24	0.62	0.27	1.18	0.47	0.355216	-1.49323	0.000216459	0.0353618	down	yes
MSTRG.9506	LOC102187807;LOC102188356	MSTRG.9506.1;MSTRG.9506.2;XM_018065854.1;XM_013972936.2	GO:0016021(integral component of membrane);GO:0016021(integral component of membrane)	01230(Biosynthesis of amino acids);00330(Arginine and proline metabolism)	K00286	EC:1.5.1.2	PREDICTED: Capra hircus myeloid-associated differentiation marker-like (LOC102188356), mRNA;PREDICTED: Capra hircus myeloid-associated differentiation marker-like (LOC102187807), mRNA	10.16	13.69	9.26	4.82	16.65	2.25	4.34	1	6.72	1.53141	0.614862	0.000786622	0.0556871	up	yes
MSTRG.9528		MSTRG.9528.1						10.46	18.56	18.96	12.24	10.48	13.42	12.16	14.99	11.62	1.20113	0.264396	0.0021277	0.0931445	up	yes
MSTRG.9529		MSTRG.9529.1						10.62	18.74	19.04	12.36	10.58	13.55	12.23	15.13	11.73	1.20136	0.264669	0.00213402	0.093162	up	yes
MSTRG.9530	LOC102184379	MSTRG.9530.1;MSTRG.9530.2;102184379						7.22	20.86	17.58	27.43	27.81	32.6	42.1	8.3	12.99	0.737985	-0.438337	0.000599506	0.0509289	down	yes
MSTRG.9531		MSTRG.9531.1						1.7	4.54	5.69	6.39	3.08	6.99	5.27	1.09	1.29	1.29233	0.369969	0.000137597	0.034214	up	yes
MSTRG.9589	LOC108638465	MSTRG.9589.1;XR_001919824.1;MSTRG.9589.3;MSTRG.9589.2					PREDICTED: Capra hircus uncharacterized LOC108638465 (LOC108638465), ncRNA	3.14	2.43	2.35	12.25	0.72	1.71	3.04	4.09	7.18	1.50612	0.59084	0.000246132	0.035892	up	yes
MSTRG.9729	CHGA	XM_018066172.1;XM_018066173.1	GO:0002551(mast cell chemotaxis);GO:0003674(molecular_function);GO:0005576(extracellular region);GO:0016525(negative regulation of angiogenesis);GO:0030141(secretory granule);GO:0030155(regulation of cell adhesion);GO:0030658(transport vesicle membrane);GO:0031640(killing of cells of other organism);GO:0032762(mast cell cytokine production);GO:0033604(negative regulation of catecholamine secretio…	00970(Aminoacyl-tRNA biosynthesis);00970(Aminoacyl-tRNA biosynthesis)	K01875	EC:6.1.1.11	PREDICTED: Capra hircus chromogranin A (CHGA), transcript variant X1, mRNA;PREDICTED: Capra hircus chromogranin A (CHGA), transcript variant X2, mRNA	2.71	3.93	4.16	2.54	3.16	2.87	1.88	3.57	13.72	0.661706	-0.595737	0.00234165	0.0963385	down	yes

## Sheet: KC vs. KR
S4 Differentially expressed gene list of kid goats between KC and KR groups
gene_id	gene_name	transcript_id	GO	KEGG	KO_ENTRY	EC	Description	FPKM.KR1	FPKM.KR2	FPKM.KR3	FPKM.KR4	FPKM.KC2	FPKM.KC3	FPKM.KC4	FC	log2(FC)	pval	qval	regulation	significant
102168759	LOC102168759	XM_018045655.1	GO:0000064(L-ornithine transmembrane transporter activity);GO:0005887(integral component of plasma membrane);GO:0015181(arginine transmembrane transporter activity);GO:0015189(L-lysine transmembrane transporter activity);GO:0015297(antiporter activity);GO:1903352(L-ornithine transmembrane transport);GO:1903401(L-lysine transmembrane transport)	05206(MicroRNAs in cancer)	K13863		PREDICTED: Capra hircus cationic amino acid transporter 3-like (LOC102168759), mRNA	0	0.02	0	0	0	0	0	inf	inf	2.29772e-18	1.06136e-14	up	yes
102169141	DNAH7	XM_005676291.3	GO:0003341(cilium movement);GO:0003777(microtubule motor activity);GO:0005509(calcium ion binding);GO:0005524(ATP binding);GO:0005737(cytoplasm);GO:0016887(ATPase activity);GO:0036156(inner dynein arm);GO:0036159(inner dynein arm assembly)	05016(Huntington's disease)	K10408		PREDICTED: Capra hircus dynein axonemal heavy chain 7 (DNAH7), mRNA	0.19	0.05	0.02	0.02	0.07	0.06	0.14	0.777778	-0.36257	2.71983e-09	2.7686e-06	down	yes
102169782	LOC102169782	XM_018045611.1	GO:0000786(nucleosome);GO:0003677(DNA binding);GO:0005634(nucleus);GO:0046982(protein heterodimerization activity)	05202(Transcriptional misregulation in cancers);05322(Systemic lupus erythematosus);05034(Alcoholism)	K11253		PREDICTED: Capra hircus histone H3.3-like (LOC102169782), mRNA	0.29	0.17	0.12	0.49	0.13	0.12	0.1	2.29286	1.19715	0.000375064	0.0511327	up	yes
102171059	GRIA1	XM_005683203.2;XM_005683204.2	GO:0004971(AMPA glutamate receptor activity);GO:0005234(extracellular-glutamate-gated ion channel activity);GO:0005783(endoplasmic reticulum);GO:0007268(chemical synaptic transmission);GO:0007616(long-term memory);GO:0008021(synaptic vesicle);GO:0009986(cell surface);GO:0014069(postsynaptic density);GO:0030054(cell junction);GO:0031623(receptor internalization);GO:0032281(AMPA glutamate receptor …	04024(cAMP signaling pathway);04080(Neuroactive ligand-receptor interaction);04724(Glutamatergic synapse);04728(Dopaminergic synapse);04720(Long-term potentiation);04730(Long-term depression);04723(Retrograde endocannabinoid signaling);04713(Circadian entrainment);05014(Amyotrophic lateral sclerosis (ALS));05031(Amphetamine addiction);05033(Nicotine addiction);05033(Nicotine addiction)	K05197		PREDICTED: Capra hircus glutamate ionotropic receptor AMPA type subunit 1 (GRIA1), transcript variant X3, mRNA;PREDICTED: Capra hircus glutamate ionotropic receptor AMPA type subunit 1 (GRIA1), transcript variant X4, mRNA	0.17	0.06	0.08	0.11	0.13	0.07	0.06	1.21154	0.27684	0.000536232	0.0647765	up	yes
102172674	TMEM14A	XM_005696417.3;XM_013973906.2;XM_013973904.2;XM_018039205.1;XM_013973902.2;XM_018039201.1;XM_018039203.1;XM_018039204.1;XM_013973903.2;XM_018039202.1;XM_005696421.3;XM_018039200.1	GO:0016021(integral component of membrane);GO:0016021(integral component of membrane)				PREDICTED: Capra hircus transmembrane protein 14A (TMEM14A), transcript variant X4, mRNA;PREDICTED: Capra hircus transmembrane protein 14A (TMEM14A), transcript variant X11, mRNA;PREDICTED: Capra hircus transmembrane protein 14A (TMEM14A), transcript variant X6, mRNA;PREDICTED: Capra hircus transmembrane protein 14A (TMEM14A), transcript variant X10, mRNA;PREDICTED: Capra hircus transmembrane pro…	2.36	1.32	1.75	1.2	0.87	0.55	1.27	1.84851	0.886365	0.000707245	0.0778392	up	yes
102174743	TLE3	XM_018053574.1;XM_018053576.1;XM_018053573.1;XM_018053575.1;XM_018053569.1;XM_018053570.1;XM_018053571.1;XM_018053572.1	GO:0005634(nucleus);GO:0006355(regulation of transcription, DNA-templated);GO:0005515(protein binding);GO:0005654(nucleoplasm);GO:0006351(transcription, DNA-templated);GO:0007165(signal transduction);GO:0009887(organ morphogenesis);GO:0016055(Wnt signaling pathway);GO:0016055(Wnt signaling pathway)	04310(Wnt signaling pathway);04330(Notch signaling pathway);04330(Notch signaling pathway)	K04497		PREDICTED: Capra hircus transducin like enhancer of split 3 (TLE3), transcript variant X6, mRNA;PREDICTED: Capra hircus transducin like enhancer of split 3 (TLE3), transcript variant X8, mRNA;PREDICTED: Capra hircus transducin like enhancer of split 3 (TLE3), transcript variant X5, mRNA;PREDICTED: Capra hircus transducin like enhancer of split 3 (TLE3), transcript variant X7, mRNA;PREDICTED: Capr…	1.18	0.69	2.03	0.46	0.65	0.67	1.39	1.20664	0.270998	9.30524e-06	0.00319059	up	yes
102180405	CUBN	XM_005687978.3	GO:0004872(receptor activity);GO:0005509(calcium ion binding);GO:0005768(endosome);GO:0005783(endoplasmic reticulum);GO:0005794(Golgi apparatus);GO:0005903(brush border);GO:0005905(clathrin-coated pit);GO:0006898(receptor-mediated endocytosis);GO:0016324(apical plasma membrane);GO:0030139(endocytic vesicle);GO:0042803(protein homodimerization activity);GO:0042953(lipoprotein transport);GO:0070062…	04977(Vitamin digestion and absorption)	K14616		PREDICTED: Capra hircus cubilin (CUBN), mRNA	0.17	0.03	0.08	0.06	0.07	0.1	0.26	0.593023	-0.753839	2.48899e-06	0.00115165	down	yes
102183373	LOC102183373	XM_018066676.1	GO:0005641(nuclear envelope lumen);GO:0007165(signal transduction);GO:0016021(integral component of membrane);GO:0030027(lamellipodium)	04014(Ras signaling pathway);04015(Rap1 signaling pathway);04151(PI3K-Akt signaling pathway);04060(Cytokine-cytokine receptor interaction);04215(Apoptosis - multiple species);04722(Neurotrophin signaling pathway);05202(Transcriptional misregulation in cancers)	K02583		PREDICTED: Capra hircus death domain-containing membrane protein NRADD (LOC102183373), mRNA	0.13	1.07	1.05	2.35	0.08	1.25	0.68	1.71642	0.779401	1.62204e-06	0.000825562	up	yes
102184352	ISM1	XM_018056928.1;XM_018056929.1	GO:0005576(extracellular region);GO:0005576(extracellular region)	04015(Rap1 signaling pathway);04350(TGF-beta signaling pathway);04151(PI3K-Akt signaling pathway);04512(ECM-receptor interaction);04145(Phagosome);04115(p53 signaling pathway);04510(Focal adhesion);05206(MicroRNAs in cancer);05205(Proteoglycans in cancer);05219(Bladder cancer);05144(Malaria);05144(Malaria)	K16857		PREDICTED: Capra hircus isthmin 1 (ISM1), transcript variant X1, mRNA;PREDICTED: Capra hircus isthmin 1 (ISM1), transcript variant X2, mRNA	0.32	0.14	0.67	0.1	0.11	0.21	0.24	1.64732	0.720122	0.000110384	0.0200649	up	yes
102184354	WISP2	XM_013968914.2;XM_018057907.1	GO:0001558(regulation of cell growth);GO:0005178(integrin binding);GO:0005520(insulin-like growth factor binding);GO:0005578(proteinaceous extracellular matrix);GO:0005615(extracellular space);GO:0007155(cell adhesion);GO:0007165(signal transduction);GO:0007267(cell-cell signaling);GO:0008201(heparin binding);GO:0060548(negative regulation of cell death);GO:0070062(extracellular exosome);GO:00700…	04390(Hippo signaling pathway);04390(Hippo signaling pathway)	K06827		PREDICTED: Capra hircus WNT1 inducible signaling pathway protein 2 (WISP2), transcript variant X2, mRNA;PREDICTED: Capra hircus WNT1 inducible signaling pathway protein 2 (WISP2), transcript variant X1, mRNA	0.06	0.07	0.08	0	0.02	0.04	0.02	1.96875	0.97728	2.00471e-06	0.000956561	up	yes
102184538	RIMS1	XM_018058836.1;XM_018058831.1;XM_018058842.1;XM_018058830.1;XM_018058835.1;XM_018058841.1	GO:0006461(protein complex assembly);GO:0006887(exocytosis);GO:0016020(membrane);GO:0017137(Rab GTPase binding);GO:0044822(poly(A) RNA binding);GO:0048786(presynaptic active zone);GO:0005515(protein binding);GO:0005829(cytosol);GO:0005886(plasma membrane);GO:0006886(intracellular protein transport);GO:0007269(neurotransmitter secretion);GO:0007601(visual perception);GO:0010628(positive regulation…	04723(Retrograde endocannabinoid signaling);04721(Synaptic vesicle cycle);04721(Synaptic vesicle cycle)	K15291		PREDICTED: Capra hircus regulating synaptic membrane exocytosis 1 (RIMS1), transcript variant X7, mRNA;PREDICTED: Capra hircus regulating synaptic membrane exocytosis 1 (RIMS1), transcript variant X2, mRNA;PREDICTED: Capra hircus regulating synaptic membrane exocytosis 1 (RIMS1), transcript variant X12, mRNA;PREDICTED: Capra hircus regulating synaptic membrane exocytosis 1 (RIMS1), transcript var…	0.19	0.42	0.13	0.28	0.08	0.2	0.25	1.4434	0.529467	0.000762469	0.0808482	up	yes
102186543	PIAS2	XM_018039505.1;XM_018039504.1;XM_018039507.1;XM_005697176.3;XM_013974384.2;XM_018039501.1;XM_018039502.1;XM_018039508.1;XM_018039506.1	GO:0003677(DNA binding);GO:0006351(transcription, DNA-templated);GO:0008134(transcription factor binding);GO:0008270(zinc ion binding);GO:0016605(PML body);GO:0016925(protein sumoylation);GO:0031625(ubiquitin protein ligase binding);GO:0043433(negative regulation of sequence-specific DNA binding transcription factor activity);GO:0045667(regulation of osteoblast differentiation);GO:0045944(positiv…	04120(Ubiquitin mediated proteolysis);04630(Jak-STAT signaling pathway);05200(Pathways in cancer);05222(Small cell lung cancer);05222(Small cell lung cancer)	K16063		PREDICTED: Capra hircus protein inhibitor of activated STAT 2 (PIAS2), transcript variant X7, mRNA;PREDICTED: Capra hircus protein inhibitor of activated STAT 2 (PIAS2), transcript variant X6, mRNA;PREDICTED: Capra hircus protein inhibitor of activated STAT 2 (PIAS2), transcript variant X9, mRNA;PREDICTED: Capra hircus protein inhibitor of activated STAT 2 (PIAS2), transcript variant X5, mRNA;PRE…	0.47	2.7	2.93	0.52	0.84	0.78	0.74	2.10381	1.07301	7.89717e-06	0.00298545	up	yes
102191136	AQP3	XM_018052367.1	GO:0002684(positive regulation of immune system process);GO:0005634(nucleus);GO:0005737(cytoplasm);GO:0005887(integral component of plasma membrane);GO:0005911(cell-cell junction);GO:0009992(cellular water homeostasis);GO:0015204(urea transmembrane transporter activity);GO:0015250(water channel activity);GO:0015254(glycerol channel activity);GO:0015793(glycerol transport);GO:0016323(basolateral p…	04962(Vasopressin-regulated water reabsorption)	K09876		PREDICTED: Capra hircus aquaporin 3 (Gill blood group) (AQP3), mRNA	0.06	0.2	0.16	0.27	0	0.08	1.99	0.25	-2	0.000756976	0.0808271	down	yes
102191544	RGSL1	XM_005690946.2	GO:0005096(GTPase activator activity);GO:0005737(cytoplasm);GO:0005886(plasma membrane);GO:0043547(positive regulation of GTPase activity)				PREDICTED: Capra hircus regulator of G-protein signaling like 1 (RGSL1), mRNA	0.15	0.16	0.08	0.36	0.57	0.15	0.63	0.416667	-1.26303	0.000822902	0.0866544	down	yes
106502497	FRMD1	XM_018044881.1;XM_018044882.1;XM_018044883.1;XM_018044884.1;XM_018044885.1;XM_018044886.1	GO:0005856(cytoskeleton);GO:0005856(cytoskeleton)	04390(Hippo signaling pathway);04390(Hippo signaling pathway)	K16821		PREDICTED: Capra hircus FERM domain containing 1 (FRMD1), transcript variant X1, mRNA;PREDICTED: Capra hircus FERM domain containing 1 (FRMD1), transcript variant X2, mRNA;PREDICTED: Capra hircus FERM domain containing 1 (FRMD1), transcript variant X3, mRNA;PREDICTED: Capra hircus FERM domain containing 1 (FRMD1), transcript variant X4, mRNA;PREDICTED: Capra hircus FERM domain containing 1 (FRMD1…	1.13	2.17	1.12	2.77	2.04	3.2	3.26	0.634412	-0.656509	4.16579e-07	0.00025443	down	yes
106503245	GJD3	XM_013972179.2	GO:0005216(ion channel activity);GO:0005922(connexon complex);GO:0007154(cell communication);GO:0009986(cell surface);GO:0016021(integral component of membrane);GO:0016264(gap junction assembly);GO:0034220(ion transmembrane transport)	04540(Gap junction)	K07373		PREDICTED: Capra hircus gap junction protein delta 3 (GJD3), mRNA	0.12	0.22	0.19	0.09	0.3	0.6	0.46	0.341912	-1.5483	5.7588e-05	0.0122127	down	yes
108635390	LOC108635390	XM_018045551.1	GO:0001909(leukocyte mediated cytotoxicity);GO:0005829(cytosol);GO:0006904(vesicle docking involved in exocytosis);GO:0016324(apical plasma membrane);GO:0017075(syntaxin-1 binding);GO:0030348(syntaxin-3 binding);GO:0031201(SNARE complex);GO:0042581(specific granule);GO:0042582(azurophil granule);GO:0043312(neutrophil degranulation);GO:0044194(cytolytic granule);GO:0070062(extracellular exosome);G…	04721(Synaptic vesicle cycle)	K15292		PREDICTED: Capra hircus syntaxin-binding protein 2-like (LOC108635390), mRNA	1.97	0	2.51	2.39	2.66	2.69	1.89	0.711671	-0.490717	4.80787e-05	0.0109569	down	yes
MSTRG.10237	MYLK4	XM_018039262.1;XM_018039261.1;XM_018039260.1;XM_018039259.1	GO:0004674(protein serine/threonine kinase activity);GO:0005524(ATP binding);GO:0006468(protein phosphorylation);GO:0070062(extracellular exosome);GO:0070062(extracellular exosome)	04020(Calcium signaling pathway);04022(cGMP - PKG signaling pathway);04810(Regulation of actin cytoskeleton);04510(Focal adhesion);04611(Platelet activation);04921(Oxytocin signaling pathway);04270(Vascular smooth muscle contraction);04971(Gastric acid secretion);04971(Gastric acid secretion)	K00907	EC:2.7.11.18	PREDICTED: Capra hircus myosin light chain kinase family member 4 (MYLK4), transcript variant X4, mRNA;PREDICTED: Capra hircus myosin light chain kinase family member 4 (MYLK4), transcript variant X3, mRNA;PREDICTED: Capra hircus myosin light chain kinase family member 4 (MYLK4), transcript variant X2, mRNA;PREDICTED: Capra hircus myosin light chain kinase family member 4 (MYLK4), transcript vari…	1.78	4.92	2.12	1.81	2.85	4.67	2.26	0.815184	-0.294802	0.000718437	0.0778392	down	yes
MSTRG.10444	SAPCD1	XM_005696573.3	GO:0003674(molecular_function);GO:0005575(cellular_component);GO:0008150(biological_process)				PREDICTED: Capra hircus suppressor APC domain containing 1 (SAPCD1), mRNA	2.3	1.17	1.04	1.39	0.99	1.86	0.67	1.2571	0.330102	0.00043689	0.0555906	up	yes
MSTRG.10582	ZFAND3	MSTRG.10582.1						2.95	1.28	0.39	1.03	0.22	0.23	0.29	5.72635	2.51762	1.39437e-05	0.00401711	up	yes
MSTRG.10752	DLGAP1	MSTRG.10752.1						0.26	0.03	0.06	0	0	0.03	0.08	2.38636	1.25481	7.06349e-10	9.80477e-07	up	yes
MSTRG.10822	LMAN1	XM_018039620.1;XM_018039619.1;MSTRG.10822.3;MSTRG.10822.4;MSTRG.10822.5	GO:0005537(mannose binding);GO:0005793(endoplasmic reticulum-Golgi intermediate compartment);GO:0005794(Golgi apparatus);GO:0006888(ER to Golgi vesicle-mediated transport);GO:0007029(endoplasmic reticulum organization);GO:0007030(Golgi organization);GO:0010638(positive regulation of organelle organization);GO:0016021(integral component of membrane);GO:0030017(sarcomere);GO:0030134(ER to Golgi tra…	04141(Protein processing in endoplasmic reticulum);04141(Protein processing in endoplasmic reticulum)	K10080		PREDICTED: Capra hircus lectin, mannose binding 1 (LMAN1), transcript variant X2, mRNA;PREDICTED: Capra hircus lectin, mannose binding 1 (LMAN1), transcript variant X1, mRNA	22.3	8.95	26.32	29.19	8.59	41.44	36.26	0.754085	-0.407201	0.000240769	0.0382948	down	yes
MSTRG.10924	LOC102186545	XR_311067.3					PREDICTED: Capra hircus uncharacterized LOC102186545 (LOC102186545), ncRNA	5.11	2.56	1.9	1	2.61	0.96	2.75	1.25435	0.326941	0.000225133	0.0369629	up	yes
MSTRG.11016	KIAA0430	XM_018040666.1;XM_018040667.1	GO:0000166(nucleotide binding);GO:0003723(RNA binding);GO:0005777(peroxisome);GO:0006302(double-strand break repair);GO:0007143(female meiotic division);GO:0010468(regulation of gene expression);GO:0010923(negative regulation of phosphatase activity);GO:0016020(membrane);GO:0048477(oogenesis);GO:0048477(oogenesis)				PREDICTED: Capra hircus KIAA0430 ortholog (KIAA0430), transcript variant X1, mRNA;PREDICTED: Capra hircus KIAA0430 ortholog (KIAA0430), transcript variant X2, mRNA	9.21	0.91	6.65	7.84	1.11	1.03	1.93	4.53501	2.18111	2.78043e-18	1.06136e-14	up	yes
MSTRG.11573		MSTRG.11573.1						1.15	4.66	6.06	1.82	2.38	3.85	7.14	0.767951	-0.380915	0.000432932	0.0555906	down	yes
MSTRG.11611	PRKG1	MSTRG.11611.1						0.87	0.1	0.17	0.19	0.04	0.11	0.04	5.25	2.39232	0.00084033	0.0875619	up	yes
MSTRG.11659	ANK1	MSTRG.11659.1						2.1	0.88	0.77	1.61	0.7	0.54	0.53	2.27119	1.18345	1.03519e-07	7.52678e-05	up	yes
MSTRG.11814	TMEM254	XM_018042547.1;MSTRG.11814.1;MSTRG.11814.3;MSTRG.11814.4;XM_018042548.1	GO:0016021(integral component of membrane);GO:0016021(integral component of membrane)				PREDICTED: Capra hircus transmembrane protein 254 (TMEM254), transcript variant X1, mRNA;PREDICTED: Capra hircus transmembrane protein 254 (TMEM254), transcript variant X2, mRNA	0.72	0.63	1.49	3.46	0.6	1.53	0.51	1.78977	0.839776	1.01234e-05	0.00321324	up	yes
MSTRG.11853	ASCC1	MSTRG.11853.1						40.86	11.5	0.84	2.19	0.41	28.21	0.15	1.44395	0.530023	0.000687719	0.076648	up	yes
MSTRG.12078	BEST1	XM_018043336.1;XM_018043337.1;MSTRG.12078.2;MSTRG.12078.1;MSTRG.12078.5;MSTRG.12078.6;MSTRG.12078.7;MSTRG.12078.8;MSTRG.12078.9	GO:0005254(chloride channel activity);GO:0005887(integral component of plasma membrane);GO:0016323(basolateral plasma membrane);GO:0030321(transepithelial chloride transport);GO:0034707(chloride channel complex);GO:0050908(detection of light stimulus involved in visual perception);GO:0051924(regulation of calcium ion transport);GO:1902476(chloride transmembrane transport);GO:1902476(chloride tran…	04970(Salivary secretion);04970(Salivary secretion)	K13879		PREDICTED: Capra hircus bestrophin 1 (BEST1), transcript variant X1, mRNA;PREDICTED: Capra hircus bestrophin 1 (BEST1), transcript variant X2, mRNA	0.85	0.78	0.52	0.51	0.43	5.78	0.2	0.311232	-1.68394	0.000202251	0.0344402	down	yes
MSTRG.12110	LOC102189282	MSTRG.12110.1;MSTRG.12110.2;XM_005699805.3	GO:0005452(inorganic anion exchanger activity);GO:0005887(integral component of plasma membrane);GO:0015347(sodium-independent organic anion transmembrane transporter activity);GO:0015698(inorganic anion transport);GO:0043252(sodium-independent organic anion transport);GO:0055085(transmembrane transport)	04976(Bile secretion)	K08205		PREDICTED: Capra hircus solute carrier family 22 member 10-like (LOC102189282), mRNA	3.52	7.8	8.16	5.85	13.85	10.95	10.19	0.542941	-0.881133	9.84779e-10	1.25305e-06	down	yes
MSTRG.12199	CTSW	XM_005699902.3	GO:0004197(cysteine-type endopeptidase activity);GO:0005615(extracellular space);GO:0005764(lysosome);GO:0006955(immune response);GO:0016020(membrane);GO:0051603(proteolysis involved in cellular protein catabolic process)	04142(Lysosome);04210(Apoptosis)	K08569	EC:3.4.22.-	PREDICTED: Capra hircus cathepsin W (CTSW), mRNA	5.46	5.2	11.4	4.43	4.06	10.27	14.95	0.678535	-0.559505	5.93693e-06	0.00238944	down	yes
MSTRG.12432	OTC	MSTRG.12432.1;NM_001285729.1	GO:0000050(urea cycle);GO:0004585(ornithine carbamoyltransferase activity);GO:0005743(mitochondrial inner membrane);GO:0006593(ornithine catabolic process);GO:0016597(amino acid binding);GO:0019240(citrulline biosynthetic process);GO:0097272(ammonia homeostasis)	01230(Biosynthesis of amino acids);00220(Arginine biosynthesis)	K00611	EC:2.1.3.3	Capra hircus ornithine carbamoyltransferase (OTC), mRNA	44.19	52.2	43.61	15.45	52.06	66.42	62.65	0.643668	-0.635612	0.00052635	0.0647765	down	yes
MSTRG.12434	LOC108633317	MSTRG.12434.1						0.21	0.26	0.12	0.04	0.07	0.05	0.13	1.89	0.918386	7.76735e-05	0.0152051	up	yes
MSTRG.12464	S100G	XM_005701057.2	GO:0005509(calcium ion binding);GO:0016323(basolateral plasma membrane);GO:0016324(apical plasma membrane)	04978(Mineral absorption)	K14734		PREDICTED: Capra hircus S100 calcium binding protein G (S100G), mRNA	0	0.08	0	0	0	0.1	0	0.6	-0.736966	2.51044e-07	0.000159716	down	yes
MSTRG.12598		MSTRG.12598.1						0.48	0.22	0.26	0.15	0.08	0.21	0.17	1.80978	0.855816	9.04448e-09	8.42368e-06	up	yes
MSTRG.1262	C8B	MSTRG.1262.1;XM_005678354.3	GO:0005579(membrane attack complex);GO:0006955(immune response);GO:0070062(extracellular exosome)	04610(Complement and coagulation cascades);05322(Systemic lupus erythematosus);05020(Prion diseases);05146(Amoebiasis)	K03998		PREDICTED: Capra hircus complement C8 beta chain (C8B), mRNA	18.52	44.67	74.13	10.97	31.15	48.45	85.11	0.675232	-0.566544	0.000370509	0.0509667	down	yes
MSTRG.12702	LOC108634577	XM_018044565.1					PREDICTED: Capra hircus collagen alpha-1(I) chain-like (LOC108634577), mRNA	17.68	1.49	0.76	13.48	7.11	0	7.65	1.69766	0.76355	2.32438e-08	1.97172e-05	up	yes
MSTRG.12823	FRMD1	MSTRG.12823.1						3.3	4.29	2.35	8.09	2.95	4.92	3.29	1.21169	0.277025	1.03117e-05	0.00321324	up	yes
MSTRG.13085		MSTRG.13085.1						5.42	1.7	1.39	8.1	1.93	1.91	1.34	2.40492	1.26599	0.000232054	0.0372972	up	yes
MSTRG.1310	ST6GALNAC3	MSTRG.1310.1						1.52	0.17	0.25	0.09	0.07	0.05	0.05	8.95588	3.16284	0.00029486	0.0432906	up	yes
MSTRG.13108		MSTRG.13108.1						3.01	1.02	0.37	1.28	0.29	0.41	0.41	3.83784	1.94029	8.90328e-06	0.00316149	up	yes
MSTRG.1338	LOC102170144	XM_018045708.1;XM_018045707.1;XM_018045709.1	GO:0003924(GTPase activity);GO:0005525(GTP binding);GO:0005525(GTP binding)	03013(RNA transport);03013(RNA transport)	K03254		PREDICTED: Capra hircus guanylate-binding protein 1 (LOC102170144), transcript variant X2, mRNA;PREDICTED: Capra hircus guanylate-binding protein 1 (LOC102170144), transcript variant X1, mRNA;PREDICTED: Capra hircus guanylate-binding protein 1 (LOC102170144), transcript variant X3, mRNA	4.1	1.31	15.47	4.49	2.5	2.17	6.59	1.68983	0.756879	0.000294851	0.0432906	up	yes
MSTRG.1361	EVI5	XM_013962624.2;XM_013962625.2;XM_013962627.2;XM_013962629.2;XM_018045761.1;XM_018045762.1;XM_013962630.2;XM_018045764.1	GO:0005096(GTPase activator activity);GO:0005622(intracellular);GO:0005794(Golgi apparatus);GO:0005829(cytosol);GO:0006886(intracellular protein transport);GO:0012505(endomembrane system);GO:0017137(Rab GTPase binding);GO:0031338(regulation of vesicle fusion);GO:0042147(retrograde transport, endosome to Golgi);GO:0042147(retrograde transport, endosome to Golgi)	04931(Insulin resistance);04919(Thyroid hormone signaling pathway);04919(Thyroid hormone signaling pathway)	K17902		PREDICTED: Capra hircus ecotropic viral integration site 5 (EVI5), transcript variant X1, mRNA;PREDICTED: Capra hircus ecotropic viral integration site 5 (EVI5), transcript variant X2, mRNA;PREDICTED: Capra hircus ecotropic viral integration site 5 (EVI5), transcript variant X6, mRNA;PREDICTED: Capra hircus ecotropic viral integration site 5 (EVI5), transcript variant X8, mRNA;PREDICTED: Capra hi…	1	0.3	1.7	2.2	1.83	2.17	2.45	0.604651	-0.725825	0.000731476	0.0786543	down	yes
MSTRG.1377	DPYD	MSTRG.1377.1						22.73	6.44	1.86	5.29	0.53	1.17	1.31	9.04983	3.17789	0.000150847	0.0264745	up	yes
MSTRG.1414	CLCC1	MSTRG.1414.1;XM_018045845.1	GO:0005254(chloride channel activity);GO:0005634(nucleus);GO:0005783(endoplasmic reticulum);GO:0005794(Golgi apparatus);GO:0034707(chloride channel complex);GO:1902476(chloride transmembrane transport)				PREDICTED: Capra hircus chloride channel CLIC like 1 (CLCC1), mRNA	0.33	0.22	4.1	0.16	4.84	3.84	4.8	0.267619	-1.90175	0.00101363	0.099831	down	yes
MSTRG.1521	LOC102186358	XR_001295442.2;MSTRG.1521.2	GO:0003735(structural constituent of ribosome);GO:0005634(nucleus);GO:0006364(rRNA processing);GO:0006412(translation);GO:0022627(cytosolic small ribosomal subunit);GO:0042274(ribosomal small subunit biogenesis);GO:0042593(glucose homeostasis);GO:0048471(perinuclear region of cytoplasm)	03010(Ribosome);04066(HIF-1 signaling pathway);04151(PI3K-Akt signaling pathway);04150(mTOR signaling pathway);04910(Insulin signaling pathway);05205(Proteoglycans in cancer)	K02991		PREDICTED: Capra hircus 40S ribosomal protein S6 pseudogene (LOC102186358), misc_RNA	16.79	9.03	6.92	17.87	10.99	9.3	9.03	1.29459	0.3725	2.31739e-23	3.53842e-19	up	yes
MSTRG.1576	GATAD2B	XM_018046144.1;XM_018046145.1;XM_018046146.1	GO:0000122(negative regulation of transcription from RNA polymerase II promoter);GO:0000790(nuclear chromatin);GO:0000977(RNA polymerase II regulatory region sequence-specific DNA binding);GO:0000978(RNA polymerase II core promoter proximal region sequence-specific DNA binding);GO:0000980(RNA polymerase II distal enhancer sequence-specific DNA binding);GO:0003700(transcription factor activity, se…				PREDICTED: Capra hircus GATA zinc finger domain containing 2B (GATAD2B), transcript variant X1, mRNA;PREDICTED: Capra hircus GATA zinc finger domain containing 2B (GATAD2B), transcript variant X2, mRNA;PREDICTED: Capra hircus GATA zinc finger domain containing 2B (GATAD2B), transcript variant X3, mRNA	0.21	0.31	2.41	1.55	0.31	2.01	2.33	0.722581	-0.468769	0.000712073	0.0778392	down	yes
MSTRG.1579	SLC39A1	XM_005677471.3;XM_005677473.3;MSTRG.1579.3;NM_001285666.1	GO:0001701(in utero embryonic development);GO:0005385(zinc ion transmembrane transporter activity);GO:0005886(plasma membrane);GO:0016021(integral component of membrane);GO:0048701(embryonic cranial skeleton morphogenesis);GO:0060173(limb development);GO:0071577(zinc II ion transmembrane transport);GO:0071577(zinc II ion transmembrane transport)				PREDICTED: Capra hircus solute carrier family 39 member 1 (SLC39A1), transcript variant X1, mRNA;PREDICTED: Capra hircus solute carrier family 39 member 1 (SLC39A1), transcript variant X2, mRNA;Capra hircus solute carrier family 39 member 1 (SLC39A1), mRNA	7.4	18.76	23.89	5.82	15.91	14.04	21.1	0.820813	-0.284875	0.000718798	0.0778392	down	yes
MSTRG.1723	SDHC	XM_005677156.3	GO:0000104(succinate dehydrogenase activity);GO:0005743(mitochondrial inner membrane);GO:0005749(mitochondrial respiratory chain complex II, succinate dehydrogenase complex (ubiquinone));GO:0006099(tricarboxylic acid cycle);GO:0006121(mitochondrial electron transport, succinate to ubiquinone);GO:0009055(electron carrier activity);GO:0016021(integral component of membrane);GO:0020037(heme binding)…	01200(Carbon metabolism);00020(Citrate cycle (TCA cycle));00190(Oxidative phosphorylation);05010(Alzheimer's disease);05012(Parkinson's disease);05016(Huntington's disease);04932(Non-alcoholic fatty liver disease (NAFLD))	K00236		PREDICTED: Capra hircus succinate dehydrogenase complex subunit C (SDHC), mRNA	18.14	52.24	63.2	13.14	39.05	48.9	52.56	0.783147	-0.352645	0.000919037	0.0928338	down	yes
MSTRG.192	BDH1	XM_018046468.1;XM_018046459.1	GO:0003858(3-hydroxybutyrate dehydrogenase activity);GO:0005654(nucleoplasm);GO:0005759(mitochondrial matrix);GO:0055114(oxidation-reduction process);GO:0055114(oxidation-reduction process)	00650(Butanoate metabolism);00072(Synthesis and degradation of ketone bodies);00072(Synthesis and degradation of ketone bodies)	K00019	EC:1.1.1.30	PREDICTED: Capra hircus 3-hydroxybutyrate dehydrogenase, type 1 (BDH1), transcript variant X2, mRNA;PREDICTED: Capra hircus 3-hydroxybutyrate dehydrogenase, type 1 (BDH1), transcript variant X1, mRNA	0.15	0.43	0.48	0.03	0.13	0.25	0.3	1.20221	0.265684	4.55226e-05	0.0105316	up	yes
MSTRG.2102	C1GALT1	XM_018047389.1;XM_018047386.1;XM_018047387.1	GO:0001525(angiogenesis);GO:0001822(kidney development);GO:0016021(integral component of membrane);GO:0016263(glycoprotein-N-acetylgalactosamine 3-beta-galactosyltransferase activity);GO:0016267(O-glycan processing, core 1);GO:0046872(metal ion binding);GO:0060576(intestinal epithelial cell development);GO:0060576(intestinal epithelial cell development)	00512(Mucin type O-glycan biosynthesis);00512(Mucin type O-glycan biosynthesis)	K00731	EC:2.4.1.122	PREDICTED: Capra hircus core 1 synthase, glycoprotein-N-acetylgalactosamine 3-beta-galactosyltransferase 1 (C1GALT1), transcript variant X3, mRNA;PREDICTED: Capra hircus core 1 synthase, glycoprotein-N-acetylgalactosamine 3-beta-galactosyltransferase 1 (C1GALT1), transcript variant X1, mRNA;PREDICTED: Capra hircus core 1 synthase, glycoprotein-N-acetylgalactosamine 3-beta-galactosyltransferase 1 …	3.38	0.55	0.81	0.18	3.37	2.5	0.63	0.567692	-0.816819	3.90216e-12	8.51172e-09	down	yes
MSTRG.2135	ANKIB1	MSTRG.2135.1						3.53	0.82	0.37	0.62	0.11	0.18	0.26	7.28182	2.8643	0.000253634	0.0395178	up	yes
MSTRG.2275	TUBA1C	XM_018047844.1	GO:0003924(GTPase activity);GO:0005200(structural constituent of cytoskeleton);GO:0005525(GTP binding);GO:0005737(cytoplasm);GO:0005874(microtubule);GO:0007017(microtubule-based process)	04145(Phagosome);04210(Apoptosis);04540(Gap junction)	K07374		PREDICTED: Capra hircus tubulin alpha 1c (TUBA1C), mRNA	33.38	59.23	53.78	29.65	48.38	52.08	59.51	0.825342	-0.276936	0.000863472	0.0886781	down	yes
MSTRG.2500		MSTRG.2500.1						0.85	0.37	0.68	0.69	0.17	0.68	0.31	1.67457	0.74379	8.12994e-05	0.015336	up	yes
MSTRG.2546	ITPR2	MSTRG.2546.1						5.01	1.52	0.7	1.29	0.23	0.37	0.35	6.72632	2.74982	3.3425e-05	0.00797448	up	yes
MSTRG.2623	C1S	MSTRG.2623.1;MSTRG.2623.2;XM_013964253.2;XM_005680922.3	GO:0004252(serine-type endopeptidase activity);GO:0005509(calcium ion binding);GO:0006508(proteolysis);GO:0006956(complement activation);GO:0042802(identical protein binding);GO:0070062(extracellular exosome);GO:0072562(blood microparticle);GO:0072562(blood microparticle)	04610(Complement and coagulation cascades);05322(Systemic lupus erythematosus);05133(Pertussis);05150(Staphylococcus aureus infection);05150(Staphylococcus aureus infection)	K01331	EC:3.4.21.42	PREDICTED: Capra hircus complement C1s (C1S), transcript variant X1, mRNA;PREDICTED: Capra hircus complement C1s (C1S), transcript variant X2, mRNA	23.8	61.64	296.34	150.79	188.53	202.9	97.51	0.816925	-0.291724	0.000543021	0.0647765	down	yes
MSTRG.278	ZNF639	XM_005675288.3;XM_018047556.1;XM_018047557.1	GO:0000978(RNA polymerase II core promoter proximal region sequence-specific DNA binding);GO:0001077(transcriptional activator activity, RNA polymerase II core promoter proximal region sequence-specific binding);GO:0003700(transcription factor activity, sequence-specific DNA binding);GO:0005634(nucleus);GO:0005654(nucleoplasm);GO:0006366(transcription from RNA polymerase II promoter);GO:0030307(p…				PREDICTED: Capra hircus zinc finger protein 639 (ZNF639), transcript variant X3, mRNA;PREDICTED: Capra hircus zinc finger protein 639 (ZNF639), transcript variant X1, mRNA;PREDICTED: Capra hircus zinc finger protein 639 (ZNF639), transcript variant X2, mRNA	1	0.48	0.8	5.05	0.57	2.78	0.64	1.37782	0.462387	4.89474e-07	0.000287453	up	yes
MSTRG.284	ECT2	MSTRG.284.1						0.12	0.1	0.14	0.03	0.02	0.04	0.01	4.17857	2.06301	7.44505e-05	0.0147634	up	yes
MSTRG.286	FNDC3B	XM_018047713.1;XM_018047711.1;XM_018047701.1;XM_018047697.1;XM_018047716.1	GO:0016021(integral component of membrane);GO:0044822(poly(A) RNA binding);GO:0044822(poly(A) RNA binding)	04931(Insulin resistance);04931(Insulin resistance)	K05695	EC:3.1.3.48	PREDICTED: Capra hircus fibronectin type III domain containing 3B (FNDC3B), transcript variant X4, mRNA;PREDICTED: Capra hircus fibronectin type III domain containing 3B (FNDC3B), transcript variant X3, mRNA;PREDICTED: Capra hircus fibronectin type III domain containing 3B (FNDC3B), transcript variant X2, mRNA;PREDICTED: Capra hircus fibronectin type III domain containing 3B (FNDC3B), transcript …	1.07	1.3	3.27	0.31	1.48	1.96	0.25	1.20935	0.274231	1.36128e-05	0.0039972	up	yes
MSTRG.2867	GSTCD	MSTRG.2867.1						4.85	4.8	1.8	3.54	1.23	3.84	2.62	1.46196	0.547907	0.000842989	0.0875619	up	yes
MSTRG.287	FNDC3B	MSTRG.287.1						3.34	0.1	0.1	0.04	0.19	0.03	1.25	1.82653	0.869106	4.96237e-16	1.51541e-12	up	yes
MSTRG.2936		MSTRG.2936.1						3077.22	213.88	105.23	776.18	1786.69	74.02	5.42	1.67694	0.745829	0.000213539	0.0354406	up	yes
MSTRG.2961	UBE2K	MSTRG.2961.1						1.87	0.51	0.16	0.11	0.04	0.31	0	5.67857	2.50553	8.30969e-05	0.0154732	up	yes
MSTRG.3067	CXCL10	NM_001285721.1	GO:0002690(positive regulation of leukocyte chemotaxis);GO:0005615(extracellular space);GO:0006935(chemotaxis);GO:0006954(inflammatory response);GO:0006955(immune response);GO:0007186(G-protein coupled receptor signaling pathway);GO:0008009(chemokine activity);GO:0008201(heparin binding);GO:0008284(positive regulation of cell proliferation);GO:0009897(external side of plasma membrane);GO:0010818(…	04668(TNF signaling pathway);04060(Cytokine-cytokine receptor interaction);04620(Toll-like receptor signaling pathway);04622(RIG-I-like receptor signaling pathway);04623(Cytosolic DNA-sensing pathway);04062(Chemokine signaling pathway);05164(Influenza A)	K12671		Capra hircus C-X-C motif chemokine ligand 10 (CXCL10), mRNA	2.84	1.66	65.2	1.03	5.51	4.83	29.25	1.33992	0.422149	0.000561599	0.0659619	up	yes
MSTRG.3122	LDB2	MSTRG.3122.1						8.88	1.75	0.96	6.09	0.37	0.87	0.2	9.20833	3.20294	0.000408833	0.0538143	up	yes
MSTRG.324		MSTRG.324.1						6.75	5.5	2.33	1.62	1.45	3.53	3.3	1.46739	0.553254	1.92435e-07	0.000132376	up	yes
MSTRG.3254	CNOT8	XM_005683212.3;XM_005683213.2;XM_013965718.2	GO:0000288(nuclear-transcribed mRNA catabolic process, deadenylation-dependent decay);GO:0003676(nucleic acid binding);GO:0004535(poly(A)-specific ribonuclease activity);GO:0005634(nucleus);GO:0006351(transcription, DNA-templated);GO:0008284(positive regulation of cell proliferation);GO:0030014(CCR4-NOT complex);GO:0043928(exonucleolytic nuclear-transcribed mRNA catabolic process involved in dead…	03018(RNA degradation);03018(RNA degradation)	K12581		PREDICTED: Capra hircus CCR4-NOT transcription complex subunit 8 (CNOT8), transcript variant X1, mRNA;PREDICTED: Capra hircus CCR4-NOT transcription complex subunit 8 (CNOT8), transcript variant X2, mRNA;PREDICTED: Capra hircus CCR4-NOT transcription complex subunit 8 (CNOT8), transcript variant X3, mRNA	2.18	4.07	5.3	3.85	4.4	4.78	4.88	0.821479	-0.283704	6.4711e-05	0.0131743	down	yes
MSTRG.3329	MZB1	XM_005683014.3	GO:0002642(positive regulation of immunoglobulin biosynthetic process);GO:0003674(molecular_function);GO:0005576(extracellular region);GO:0005788(endoplasmic reticulum lumen);GO:0008284(positive regulation of cell proliferation);GO:0030888(regulation of B cell proliferation);GO:0033622(integrin activation);GO:0034663(endoplasmic reticulum chaperone complex);GO:0042127(regulation of cell prolifera…				PREDICTED: Capra hircus marginal zone B and B1 cell specific protein (MZB1), mRNA	1.87	1.82	0.62	3.13	0.89	1.25	1.55	1.5122	0.596644	8.20576e-15	2.08823e-11	up	yes
MSTRG.3351		MSTRG.3351.1						1709.5	766.26	474.45	1433.37	799.65	590.85	185.76	2.08575	1.06057	0.000908599	0.0924893	up	yes
MSTRG.3352		MSTRG.3352.1						709.21	233.47	143.17	247.52	313.33	212.36	183.84	1.40942	0.495104	0.00020509	0.0344402	up	yes
MSTRG.3366	SEC24A	XM_018050374.1;XM_018050373.1;XM_018050375.1	GO:0000139(Golgi membrane);GO:0005789(endoplasmic reticulum membrane);GO:0006886(intracellular protein transport);GO:0006888(ER to Golgi vesicle-mediated transport);GO:0008270(zinc ion binding);GO:0030127(COPII vesicle coat);GO:0045714(regulation of low-density lipoprotein particle receptor biosynthetic process);GO:0048471(perinuclear region of cytoplasm);GO:0050714(positive regulation of protein…	04141(Protein processing in endoplasmic reticulum);04141(Protein processing in endoplasmic reticulum)	K14007		PREDICTED: Capra hircus SEC24 homolog A, COPII coat complex component (SEC24A), transcript variant X2, mRNA;PREDICTED: Capra hircus SEC24 homolog A, COPII coat complex component (SEC24A), transcript variant X1, mRNA;PREDICTED: Capra hircus SEC24 homolog A, COPII coat complex component (SEC24A), transcript variant X3, mRNA	5.47	0.73	11.78	11.91	0.56	0.65	0.74	11.4962	3.52308	2.42075e-05	0.00637282	up	yes
MSTRG.3540	SMIM24	XM_013965298.2					PREDICTED: Capra hircus small integral membrane protein 24 (SMIM24), mRNA	0.27	0.39	0.99	0.87	0.26	0.37	0.4	1.83495	0.875742	5.94661e-06	0.00238944	up	yes
MSTRG.3990		MSTRG.3990.1						13.94	1.5	0.62	8.03	0	4.43	0	4.07844	2.02802	0.000276727	0.0418352	up	yes
MSTRG.3991	LOC108636637;LOC108636557;LOC106502405	XR_001918501.1;MSTRG.3991.2;XR_001918433.1;XR_001918434.1;XR_001918435.1;XR_001295973.2					PREDICTED: Capra hircus uncharacterized LOC108636637 (LOC108636637), ncRNA;PREDICTED: Capra hircus uncharacterized LOC108636557 (LOC108636557), transcript variant X1, ncRNA;PREDICTED: Capra hircus uncharacterized LOC108636557 (LOC108636557), transcript variant X2, ncRNA;PREDICTED: Capra hircus uncharacterized LOC108636557 (LOC108636557), transcript variant X3, ncRNA;PREDICTED: Capra hircus unchar…	5.12	0.54	0.44	10.88	0.06	3.07	0.08	3.96729	1.98815	0.000566094	0.0659824	up	yes
MSTRG.4059	ANP32B	MSTRG.4059.1						0.22	0.31	0.19	0	0.38	0.2	0.29	0.62069	-0.688056	3.41867e-06	0.00149142	down	yes
MSTRG.428	TFF2	XM_005675636.3	GO:0070062(extracellular exosome)				PREDICTED: Capra hircus trefoil factor 2 (TFF2), mRNA	0.34	0.2	0.65	0	0	67.02	1.38	0.0130482	-6.26	9.40313e-06	0.00319059	down	yes
MSTRG.4341		MSTRG.4341.1						0.22	0	0.17	0	0	0.31	0.11	0.696429	-0.521953	9.37865e-09	8.42368e-06	down	yes
MSTRG.5078	KANSL3	XM_018054860.1;XM_018054855.1;XM_018054859.1;XM_018054853.1;XM_018054857.1;XM_018054854.1;XM_018054858.1;XR_001918768.1	GO:0000123(histone acetyltransferase complex);GO:0005634(nucleus);GO:0005730(nucleolus);GO:0043981(histone H4-K5 acetylation);GO:0043982(histone H4-K8 acetylation);GO:0043984(histone H4-K16 acetylation);GO:0043995(histone acetyltransferase activity (H4-K5 specific));GO:0043996(histone acetyltransferase activity (H4-K8 specific));GO:0046972(histone acetyltransferase activity (H4-K16 specific));GO:…				PREDICTED: Capra hircus KAT8 regulatory NSL complex subunit 3 (KANSL3), transcript variant X8, mRNA;PREDICTED: Capra hircus KAT8 regulatory NSL complex subunit 3 (KANSL3), transcript variant X4, mRNA;PREDICTED: Capra hircus KAT8 regulatory NSL complex subunit 3 (KANSL3), transcript variant X7, mRNA;PREDICTED: Capra hircus KAT8 regulatory NSL complex subunit 3 (KANSL3), transcript variant X1, mRNA…	8.24	6.65	6.35	11.06	7.36	5.98	2.5	1.52936	0.612924	1.17748e-10	1.79789e-07	up	yes
MSTRG.5198	EML4	XM_018055168.1;XM_018055167.1;XM_005686541.3;XM_018055166.1;XM_013967586.2;MSTRG.5198.7	GO:0016020(membrane);GO:0016020(membrane)	05223(Non-small cell lung cancer);05223(Non-small cell lung cancer)	K15420		PREDICTED: Capra hircus echinoderm microtubule associated protein like 4 (EML4), transcript variant X5, mRNA;PREDICTED: Capra hircus echinoderm microtubule associated protein like 4 (EML4), transcript variant X3, mRNA;PREDICTED: Capra hircus echinoderm microtubule associated protein like 4 (EML4), transcript variant X4, mRNA;PREDICTED: Capra hircus echinoderm microtubule associated protein like 4…	2.08	8.08	6.72	1.17	2.26	2.83	2.91	1.69219	0.758889	0.000865351	0.0886781	up	yes
MSTRG.5275	IL1RN	XM_005686686.3;XM_018055336.1;XM_018055335.1;XM_013967696.2;MSTRG.5275.5;MSTRG.5275.6;MSTRG.5275.7;XM_005686683.3	GO:0005125(cytokine activity);GO:0005149(interleukin-1 receptor binding);GO:0005150(interleukin-1, Type I receptor binding);GO:0005151(interleukin-1, Type II receptor binding);GO:0005615(extracellular space);GO:0006629(lipid metabolic process);GO:0006953(acute-phase response);GO:0019221(cytokine-mediated signaling pathway);GO:0030073(insulin secretion);GO:0034115(negative regulation of heterotypi…	04010(MAPK signaling pathway);04060(Cytokine-cytokine receptor interaction);04620(Toll-like receptor signaling pathway);04621(NOD-like receptor signaling pathway);04623(Cytosolic DNA-sensing pathway);04933(AGE-RAGE signaling pathway in diabetic complications);05132(Salmonella infection);05164(Influenza A);05168(Herpes simplex infection);05168(Herpes simplex infection)	K04519		PREDICTED: Capra hircus interleukin 1 receptor antagonist (IL1RN), transcript variant X1, mRNA;PREDICTED: Capra hircus interleukin 1 receptor antagonist (IL1RN), transcript variant X4, mRNA;PREDICTED: Capra hircus interleukin 1 receptor antagonist (IL1RN), transcript variant X2, mRNA;PREDICTED: Capra hircus interleukin 1 receptor antagonist (IL1RN), transcript variant X3, mRNA;PREDICTED: Capra hi…	13.93	25.76	51.95	18.9	10.57	20.8	28.68	1.3806	0.465295	0.000112647	0.0202355	up	yes
MSTRG.5327	CEP68	XM_018055427.1;XM_018055428.1;XM_005686803.3	GO:0005634(nucleus);GO:0005737(cytoplasm);GO:0005813(centrosome);GO:0010457(centriole-centriole cohesion);GO:0019901(protein kinase binding);GO:0019904(protein domain specific binding);GO:0030054(cell junction);GO:0033365(protein localization to organelle);GO:0033365(protein localization to organelle)				PREDICTED: Capra hircus centrosomal protein 68 (CEP68), transcript variant X1, mRNA;PREDICTED: Capra hircus centrosomal protein 68 (CEP68), transcript variant X3, mRNA;PREDICTED: Capra hircus centrosomal protein 68 (CEP68), transcript variant X2, mRNA	0.88	0.82	3.25	0.81	0.8	0.97	0.51	1.89474	0.921997	0.000530596	0.0647765	up	yes
MSTRG.54		MSTRG.54.1						214.1	63	19.87	107.5	88.12	42.19	65.27	1.55104	0.633236	1.48145e-05	0.00418895	up	yes
MSTRG.5486	LOC108637166	MSTRG.5486.1						0.1	0.05	0	0	0	0	0	inf	inf	8.77484e-11	1.4887e-07	up	yes
MSTRG.56		MSTRG.56.1;MSTRG.56.2						0	0	485.53	0	0	0	0	inf	inf	0.000686732	0.076648	up	yes
MSTRG.5800	CKAP2	MSTRG.5800.1						0.15	0.23	0.22	0.03	0.08	0.07	0	3.15	1.65535	2.81369e-05	0.00692939	up	yes
MSTRG.5860	PLCB1	MSTRG.5860.1						2.63	1.38	0.45	0.58	0.13	0.41	0.23	4.90909	2.29546	2.54124e-05	0.00656641	up	yes
MSTRG.6282		MSTRG.6282.1						8.82	4.77	9.26	6.41	1.64	0.52	2.62	4.591	2.19881	0.00032557	0.0460289	up	yes
MSTRG.6668	API5	XM_005690123.3;XM_005690124.3	GO:0005654(nucleoplasm);GO:0005681(spliceosomal complex);GO:0016020(membrane);GO:0017134(fibroblast growth factor binding);GO:0044822(poly(A) RNA binding);GO:2000270(negative regulation of fibroblast apoptotic process);GO:0043066(negative regulation of apoptotic process);GO:0043066(negative regulation of apoptotic process)				PREDICTED: Capra hircus apoptosis inhibitor 5 (API5), transcript variant X1, mRNA;PREDICTED: Capra hircus apoptosis inhibitor 5 (API5), transcript variant X2, mRNA	0.76	1.67	14.63	7.77	0.98	1.22	2.6	3.87969	1.95594	1.65527e-19	1.26372e-15	up	yes
MSTRG.6900	LOC108637681	XR_001919241.1	GO:0003735(structural constituent of ribosome);GO:0006412(translation);GO:0016020(membrane);GO:0022627(cytosolic small ribosomal subunit);GO:0044822(poly(A) RNA binding)	03010(Ribosome)	K02951		PREDICTED: Capra hircus 40S ribosomal protein S12 pseudogene (LOC108637681), misc_RNA	239.22	266.65	257.17	134.6	221.99	232.68	366.89	0.819453	-0.287266	0.000977535	0.096922	down	yes
MSTRG.6940	COLCA2	MSTRG.6940.1						0.1	0.11	0.13	0.03	0.03	0.1	0.04	1.63235	0.706953	5.99351e-05	0.0125363	up	yes
MSTRG.6943	C15H11orf53	XM_018059000.1	GO:0003674(molecular_function);GO:0005575(cellular_component);GO:0008150(biological_process)				PREDICTED: Capra hircus chromosome 15 C11orf53 homolog (C15H11orf53), mRNA	0.1	0	0	0	0.05	0	0.15	0.375	-1.41504	8.13556e-05	0.015336	down	yes
MSTRG.6944		MSTRG.6944.1						0	0.1	0.05	0	0	0.06	0	1.875	0.906891	1.02198e-05	0.00321324	up	yes
MSTRG.7067	TP53BP2	XM_018060200.1;XM_018060196.1;XM_018060199.1;XM_018060201.1	GO:0002039(p53 binding);GO:0005634(nucleus);GO:0042802(identical protein binding);GO:0048471(perinuclear region of cytoplasm);GO:0051059(NF-kappaB binding);GO:0072332(intrinsic apoptotic signaling pathway by p53 class mediator);GO:0097193(intrinsic apoptotic signaling pathway);GO:1900119(positive regulation of execution phase of apoptosis);GO:0003674(molecular_function);GO:0005575(cellular_compon…	04390(Hippo signaling pathway);04390(Hippo signaling pathway)	K16823		PREDICTED: Capra hircus tumor protein p53 binding protein 2 (TP53BP2), transcript variant X3, mRNA;PREDICTED: Capra hircus tumor protein p53 binding protein 2 (TP53BP2), transcript variant X1, mRNA;PREDICTED: Capra hircus tumor protein p53 binding protein 2 (TP53BP2), transcript variant X2, mRNA;PREDICTED: Capra hircus tumor protein p53 binding protein 2 (TP53BP2), transcript variant X4, mRNA	6.34	4.27	5.21	5.18	4.39	3.72	3.95	1.30597	0.385122	0.000924143	0.0928338	up	yes
MSTRG.7101	KMO	MSTRG.7101.1						4.06	0.82	0.04	0.25	0.09	0.12	0	18.4643	4.20667	0.000287398	0.0430224	up	yes
MSTRG.7126	SUCO	XM_013970168.2;XM_013970169.2	GO:0005791(rough endoplasmic reticulum);GO:0016020(membrane);GO:0032967(positive regulation of collagen biosynthetic process);GO:0045669(positive regulation of osteoblast differentiation);GO:0046850(regulation of bone remodeling);GO:0046850(regulation of bone remodeling)				PREDICTED: Capra hircus SUN domain containing ossification factor (SUCO), transcript variant X1, mRNA;PREDICTED: Capra hircus SUN domain containing ossification factor (SUCO), transcript variant X2, mRNA	2.24	1.6	2.97	3.1	1.45	0.94	1.83	1.76126	0.816605	5.19289e-07	0.000293667	up	yes
MSTRG.7249		MSTRG.7249.1						0	0	0	0	0	0.33	0	-inf	-inf	8.48255e-08	6.476e-05	down	yes
MSTRG.7507	HECTD4	MSTRG.7507.1						1.4	0.23	0	0	0	0.07	0.16	5.31522	2.41013	7.95179e-05	0.015336	up	yes
MSTRG.7523	SDS	XM_005691473.2	GO:0003941(L-serine ammonia-lyase activity);GO:0005739(mitochondrion);GO:0006565(L-serine catabolic process);GO:0030170(pyridoxal phosphate binding);GO:0042803(protein homodimerization activity);GO:0042866(pyruvate biosynthetic process)	01200(Carbon metabolism);01230(Biosynthesis of amino acids);00260(Glycine, serine and threonine metabolism);00270(Cysteine and methionine metabolism);00290(Valine, leucine and isoleucine biosynthesis)	K17989	EC:4.3.1.17;EC:4.3.1.19	PREDICTED: Capra hircus serine dehydratase (SDS), mRNA	5.88	11.74	131.12	19.87	4.91	5.63	10.9	5.8982	2.56028	1.70463e-05	0.00464785	up	yes
MSTRG.7709	FGA	MSTRG.7709.10;MSTRG.7709.11;MSTRG.7709.12;MSTRG.7709.3;MSTRG.7709.9;MSTRG.7709.13;MSTRG.7709.14;MSTRG.7709.4;MSTRG.7709.7;MSTRG.7709.8;MSTRG.7709.2;MSTRG.7709.1;MSTRG.7709.5;MSTRG.7709.6;MSTRG.7709.15;MSTRG.7709.16						73.22	364.31	478.92	107.38	314.51	336.07	499.24	0.66782	-0.582469	4.20117e-05	0.00986888	down	yes
MSTRG.7913	CA7	XM_018062093.1	GO:0002230(positive regulation of defense response to virus by host);GO:0004089(carbonate dehydratase activity);GO:0005829(cytosol);GO:0006730(one-carbon metabolic process);GO:0008270(zinc ion binding);GO:0032230(positive regulation of synaptic transmission, GABAergic);GO:0032849(positive regulation of cellular pH reduction);GO:2001225(regulation of chloride transport)	00910(Nitrogen metabolism)	K01672	EC:4.2.1.1	PREDICTED: Capra hircus carbonic anhydrase 7 (CA7), mRNA	0.14	0	0	0	0	0.19	0.07	0.403846	-1.30812	0.00026928	0.0411163	down	yes
MSTRG.796	IDH1	XM_005676446.3;XM_018060219.1;XM_018060230.1;XM_013971375.2	GO:0000287(magnesium ion binding);GO:0004450(isocitrate dehydrogenase (NADP+) activity);GO:0006102(isocitrate metabolic process);GO:0006103(2-oxoglutarate metabolic process);GO:0006103(2-oxoglutarate metabolic process)	01200(Carbon metabolism);01210(2-Oxocarboxylic acid metabolism);01230(Biosynthesis of amino acids);00020(Citrate cycle (TCA cycle));00480(Glutathione metabolism);04146(Peroxisome);04146(Peroxisome)	K00031	EC:1.1.1.42	PREDICTED: Capra hircus isocitrate dehydrogenase (NADP(+)) 1, cytosolic (IDH1), transcript variant X1, mRNA;PREDICTED: Capra hircus isocitrate dehydrogenase (NADP(+)) 1, cytosolic (IDH1), transcript variant X2, mRNA;PREDICTED: Capra hircus isocitrate dehydrogenase (NADP(+)) 1, cytosolic (IDH1), transcript variant X4, mRNA;PREDICTED: Capra hircus isocitrate dehydrogenase (NADP(+)) 1, cytosolic (ID…	16.89	26.62	51.49	16.94	29.23	43.95	46.35	0.702376	-0.509685	0.00037876	0.0511795	down	yes
MSTRG.8406	LOC102174869	MSTRG.8406.1;XM_013971637.2	GO:0000064(L-ornithine transmembrane transporter activity);GO:0005887(integral component of plasma membrane);GO:0015181(arginine transmembrane transporter activity);GO:0015189(L-lysine transmembrane transporter activity);GO:0015297(antiporter activity);GO:1903352(L-ornithine transmembrane transport);GO:1903401(L-lysine transmembrane transport)	05206(MicroRNAs in cancer)	K13863		PREDICTED: Capra hircus cationic amino acid transporter 3-like (LOC102174869), mRNA	0.27	0.15	0.28	0	0.11	0.18	0.07	1.45833	0.544321	1.12428e-05	0.00343334	up	yes
MSTRG.8661	SSH2	MSTRG.8661.1						4.17	1.49	0.55	1.64	0.25	0.61	0.52	4.2663	2.09299	0.000268563	0.0411163	up	yes
MSTRG.882		MSTRG.882.1						4.84	1.02	0.53	2.5	0.37	0.39	0.35	6.00676	2.58659	0.000491677	0.0610359	up	yes
MSTRG.8834	LOC102188626	MSTRG.8834.1						0.52	0.18	0.04	0.54	0.03	0.08	0.12	4.17391	2.0614	5.34068e-05	0.0116495	up	yes
MSTRG.888	LOC102185788	XR_001296363.2	GO:0003735(structural constituent of ribosome);GO:0006412(translation);GO:0019843(rRNA binding);GO:0022627(cytosolic small ribosomal subunit)	03010(Ribosome)	K02987		PREDICTED: Capra hircus 40S ribosomal protein S4, X isoform-like (LOC102185788), misc_RNA	2.31	3.89	6.52	1.77	2.09	4.04	8.22	0.757317	-0.401031	0.00101995	0.099831	down	yes
MSTRG.8968	IGFBP4	NM_001285678.1	GO:0001558(regulation of cell growth);GO:0005615(extracellular space);GO:0010906(regulation of glucose metabolic process);GO:0031994(insulin-like growth factor I binding);GO:0031995(insulin-like growth factor II binding);GO:0043410(positive regulation of MAPK cascade);GO:0043567(regulation of insulin-like growth factor receptor signaling pathway);GO:0043568(positive regulation of insulin-like gro…	04115(p53 signaling pathway);05202(Transcriptional misregulation in cancers)	K10138		Capra hircus insulin like growth factor binding protein 4 (IGFBP4), mRNA	55.03	298.57	375.01	67.91	179.7	254.5	354.51	0.757427	-0.400822	3.15214e-08	2.53316e-05	down	yes
MSTRG.9	ND4;ND6;CYTB	MSTRG.9.1;MSTRG.9.2;MSTRG.9.3;MSTRG.9.4;MSTRG.9.5;MSTRG.9.6						146.03	50.96	30.69	81.05	69.39	53.98	43.57	1.38701	0.471979	1.23682e-05	0.00370295	up	yes
MSTRG.946	LNPK	MSTRG.946.1						2.39	0.25	0.3	1.05	0.12	0.34	0.1	5.34375	2.41785	0.000247408	0.0389451	up	yes
MSTRG.9481	LOC102174435	XR_001919847.1;XR_001919846.1					PREDICTED: Capra hircus uncharacterized LOC102174435 (LOC102174435), transcript variant X2, ncRNA;PREDICTED: Capra hircus uncharacterized LOC102174435 (LOC102174435), transcript variant X1, ncRNA	17.96	12.16	13.65	18.77	12.29	11.1	3.82	1.72381	0.785605	2.75283e-06	0.00123626	up	yes
MSTRG.9503	LOC102188633	MSTRG.9503.1						0	0	0	0	0	0.03	0.01	-inf	-inf	0.000157281	0.0272901	down	yes
MSTRG.9520	LOC102181632	XM_005695023.2	GO:0016021(integral component of membrane)				PREDICTED: Capra hircus myeloid-associated differentiation marker-like (LOC102181632), mRNA	0.05	0	0	0	0	0.05	0	0.75	-0.415037	0.000556332	0.0658499	down	yes
MSTRG.9661		MSTRG.9661.1						0.17	0	0.1	0	0.02	0.32	0	0.595588	-0.747613	4.89606e-05	0.0109938	down	yes
MSTRG.9673		MSTRG.9673.1						0.02	0.01	0	0.02	0	0.03	0	1.25	0.321928	6.96995e-05	0.0140032	up	yes
MSTRG.975	ORMDL1	XM_018065586.1;XM_018065580.1	GO:0005789(endoplasmic reticulum membrane);GO:0006672(ceramide metabolic process);GO:0016021(integral component of membrane);GO:0090155(negative regulation of sphingolipid biosynthetic process);GO:0090155(negative regulation of sphingolipid biosynthetic process)	00510(N-Glycan biosynthesis);04141(Protein processing in endoplasmic reticulum);04141(Protein processing in endoplasmic reticulum)	K12667		PREDICTED: Capra hircus ORMDL sphingolipid biosynthesis regulator 1 (ORMDL1), transcript variant X2, mRNA;PREDICTED: Capra hircus ORMDL sphingolipid biosynthesis regulator 1 (ORMDL1), transcript variant X1, mRNA	0.35	2.62	3.27	2.32	1.14	0.86	3.08	1.26378	0.337745	6.86937e-07	0.000374602	up	yes
MSTRG.978	HIBCH	MSTRG.978.1						12.31	19.98	2.05	23.28	2.43	17.45	6.21	1.65638	0.728035	0.000413958	0.0540232	up	yes
MSTRG.9874	OSBPL10	MSTRG.9874.1						2.27	0.26	0.17	2.01	0.44	0.2	0.04	5.19485	2.37708	1.59256e-05	0.00442124	up	yes
