# Supplementary material for: Transcriptome analysis reveals liver metabolism programming in kids from nutritional restricted goats during mid-gestation
Source: PeerJ. 2021 Jan 29;9:e10593. doi: 10.7717/peerj.10593 (PMC7849524; doi:10.7717/peerj.10593)
Supplement: Supplemental Information 9 — GO enrichment analysis of upregulated and downregulated DEGs between KC and KR. [file peerj-09-10593-s009.xlsx]

## Sheet: Up-regulated genes
S7 GO enrichment analysis of upregulated differentially expressed genes (DEGs) between KC and KR group.
GO_ID	GO_Term	GO_function	GO_class	Genes	S gene number	TS gene number	B gene number	TB gene number	pvalue	Note: S gene number: the number of significant DEGs which annotated to a specific GO term; TS gene number: the number of significant DEGs; B gene number: the number of genes which annotated to a specific GO term; TB gene number: the total number of genes.
GO:0007165	signal transduction	biological_process	4	TLE3;WISP2;LOC102183373	3	30	392	17827	0.027616
GO:0045353	interleukin-1 type II receptor antagonist activity	molecular_function	8	MSTRG.5275	1	30	1	17827	0.00168284
GO:0005150	interleukin-1, type I receptor binding	molecular_function	8	MSTRG.5275	1	30	1	17827	0.00168284
GO:0030073	insulin secretion	biological_process	11	RIMS1;IL1RN	2	30	24	17827	0.000738405
GO:1903352	L-ornithine transmembrane transport	biological_process	8	LOC102174869;LOC102168759	2	30	37	17827	0.00175776
GO:0005151	interleukin-1, type II receptor binding	molecular_function	8	MSTRG.5275	1	30	1	17827	0.00168284
GO:1903401	L-lysine transmembrane transport	biological_process	8	LOC102168759;LOC102174869	2	30	38	17827	0.00185347
GO:0045352	interleukin-1 type I receptor antagonist activity	molecular_function	8	MSTRG.5275	1	30	1	17827	0.00168284
GO:0042127	regulation of cell population proliferation	biological_process	6	MZB1;CXCL10	2	30	152	17827	0.0268774
GO:0000064	L-ornithine transmembrane transporter activity	molecular_function	7	102168759;MSTRG.8406	2	30	37	17827	0.00175776
GO:0006886	intracellular protein transport	biological_process	10	SEC24A;RIMS1	2	30	183	17827	0.0377746
GO:0015181	arginine transmembrane transporter activity	molecular_function	7	MSTRG.8406;102168759	2	30	38	17827	0.00185347
GO:0015189	L-lysine transmembrane transporter activity	molecular_function	7	102168759;MSTRG.8406	2	30	38	17827	0.00185347
GO:0002642	positive regulation of immunoglobulin biosynthetic process	biological_process	10	MZB1	1	30	1	17827	0.00168284
GO:0032591	dendritic spine membrane	cellular_component	7	102171059	1	30	2	17827	0.00336294
GO:0006565	L-serine catabolic process	biological_process	12	HECTD423	1	30	1	17827	0.00168284
GO:1901740	negative regulation of myoblast fusion	biological_process	11	CXCL10	1	30	1	17827	0.00168284
GO:0003858	3-hydroxybutyrate dehydrogenase activity	molecular_function	7	MSTRG.192	1	30	2	17827	0.00336294
GO:2000660	negative regulation of interleukin-1-mediated signaling pathway	biological_process	10	IL1RN	1	30	1	17827	0.00168284
GO:0061669	spontaneous neurotransmitter secretion	biological_process	7	RIMS1	1	30	2	17827	0.00336294
GO:0003941	L-serine ammonia-lyase activity	molecular_function	7	MSTRG.7523	1	30	2	17827	0.00336294
GO:0015297	antiporter activity	molecular_function	7	102168759;MSTRG.8406	2	30	54	17827	0.00371038
GO:0010819	regulation of T cell chemotaxis	biological_process	9	CXCL10	1	30	2	17827	0.00336294
GO:0090155	negative regulation of sphingolipid biosynthetic process	biological_process	9	ORMDL1	1	30	2	17827	0.00336294
GO:0044308	axonal spine	cellular_component	6	102171059	1	30	3	17827	0.00504031
GO:0045714	regulation of low-density lipoprotein particle receptor biosynthetic process	biological_process	9	SEC24A	1	30	2	17827	0.00336294
GO:1901509	regulation of endothelial tube morphogenesis	biological_process	8	CXCL10	1	30	3	17827	0.00504031
GO:0061665	SUMO ligase activity	molecular_function	7	102186543	1	30	4	17827	0.00671495
GO:0097151	positive regulation of inhibitory postsynaptic potential	biological_process	9	RIMS1	1	30	3	17827	0.00504031
GO:0030888	regulation of B cell proliferation	biological_process	10	MZB1	1	30	3	17827	0.00504031
GO:0046903	secretion	biological_process	6	RIMS1	1	30	3	17827	0.00504031
GO:0030054	cell junction	cellular_component	3	102184538;MSTRG.5327;102171059	3	30	234	17827	0.00697945
GO:0009792	embryo development ending in birth or egg hatching	biological_process	6	TP53BP2	1	30	4	17827	0.00671495
GO:0004971	AMPA glutamate receptor activity	molecular_function	8	102171059	1	30	5	17827	0.00838687
GO:0033574	response to testosterone	biological_process	6	PIAS2	1	30	4	17827	0.00671495
GO:0048248	CXCR3 chemokine receptor binding	molecular_function	9	MSTRG.3067	1	30	5	17827	0.00838687
GO:0005149	interleukin-1 receptor binding	molecular_function	7	MSTRG.5275	1	30	5	17827	0.00838687
GO:0042866	pyruvate biosynthetic process	biological_process	10	HECTD423	1	30	4	17827	0.00671495
GO:0035259	glucocorticoid receptor binding	molecular_function	9	102186543	1	30	5	17827	0.00838687
GO:0010818	T cell chemotaxis	biological_process	7	CXCL10	1	30	5	17827	0.00838687
GO:0034663	endoplasmic reticulum chaperone complex	cellular_component	4	MSTRG.3329	1	30	6	17827	0.0100561
GO:0034115	negative regulation of heterotypic cell-cell adhesion	biological_process	8	IL1RN	1	30	5	17827	0.00838687
GO:0045667	regulation of osteoblast differentiation	biological_process	7	PIAS2	1	30	5	17827	0.00838687
GO:2000270	negative regulation of fibroblast apoptotic process	biological_process	10	API5	1	30	5	17827	0.00838687
GO:1900119	positive regulation of execution phase of apoptosis	biological_process	10	TP53BP2	1	30	6	17827	0.0100561
GO:0005641	nuclear envelope lumen	cellular_component	6	102183373	1	30	7	17827	0.0117225
GO:0017156	calcium-ion regulated exocytosis	biological_process	9	RIMS1	1	30	6	17827	0.0100561
GO:0033622	integrin activation	biological_process	7	MZB1	1	30	6	17827	0.0100561
GO:0046850	regulation of bone remodeling	biological_process	7	SUCO	1	30	6	17827	0.0100561
GO:0042118	endothelial cell activation	biological_process	5	CXCL10	1	30	7	17827	0.0117225
GO:0060766	negative regulation of androgen receptor signaling pathway	biological_process	10	PIAS2	1	30	7	17827	0.0117225
GO:0008201	heparin binding	molecular_function	6	MSTRG.3067;102184354	2	30	101	17827	0.0124689
GO:0010033	response to organic substance	biological_process	5	PIAS2	1	30	7	17827	0.0117225
GO:0030127	COPII vesicle coat	cellular_component	8	MSTRG.3366	1	30	8	17827	0.0133863
GO:2000406	positive regulation of T cell migration	biological_process	9	CXCL10	1	30	7	17827	0.0117225
GO:0019789	SUMO transferase activity	molecular_function	6	102186543	1	30	8	17827	0.0133863
GO:0045236	CXCR chemokine receptor binding	molecular_function	8	MSTRG.3067	1	30	8	17827	0.0133863
GO:0010457	centriole-centriole cohesion	biological_process	5	CEP68	1	30	7	17827	0.0117225
GO:0043950	positive regulation of cAMP-mediated signaling	biological_process	10	CXCL10	1	30	8	17827	0.0133863
GO:0007143	female meiotic nuclear division	biological_process	5	KIAA0430	1	30	8	17827	0.0133863
GO:0030695	GTPase regulator activity	molecular_function	6	102184538	1	30	9	17827	0.0150474
GO:1901216	positive regulation of neuron death	biological_process	8	TP53BP2	1	30	8	17827	0.0133863
GO:0043995	histone acetyltransferase activity (H4-K5 specific)	molecular_function	13	MSTRG.5078	1	30	10	17827	0.0167057
GO:0060765	regulation of androgen receptor signaling pathway	biological_process	9	PIAS2	1	30	9	17827	0.0150474
GO:0014047	glutamate secretion	biological_process	11	RIMS1	1	30	9	17827	0.0150474
GO:0046972	histone acetyltransferase activity (H4-K16 specific)	molecular_function	13	MSTRG.5078	1	30	10	17827	0.0167057
GO:0043996	histone acetyltransferase activity (H4-K8 specific)	molecular_function	13	MSTRG.5078	1	30	10	17827	0.0167057
GO:0050775	positive regulation of dendrite morphogenesis	biological_process	10	PIAS2	1	30	9	17827	0.0150474
GO:0060292	long-term synaptic depression	biological_process	10	GRIA1	1	30	10	17827	0.0167057
GO:0002690	positive regulation of leukocyte chemotaxis	biological_process	8	CXCL10	1	30	10	17827	0.0167057
GO:0043923	positive regulation by host of viral transcription	biological_process	10	ZNF639	1	30	11	17827	0.0183614
GO:0043922	negative regulation by host of viral transcription	biological_process	10	ZNF639	1	30	11	17827	0.0183614
GO:0006672	ceramide metabolic process	biological_process	9	ORMDL1	1	30	11	17827	0.0183614
GO:0045055	regulated exocytosis	biological_process	8	RIMS1	1	30	11	17827	0.0183614
GO:0016079	synaptic vesicle exocytosis	biological_process	9	RIMS1	1	30	11	17827	0.0183614
GO:0046928	regulation of neurotransmitter secretion	biological_process	6	RIMS1	1	30	11	17827	0.0183614
GO:0033365	protein localization to organelle	biological_process	7	CEP68	1	30	12	17827	0.0200143
GO:0048471	perinuclear region of cytoplasm	cellular_component	6	MSTRG.7067;MSTRG.3366;MSTRG.1521	3	30	361	17827	0.0223167
GO:0019904	protein domain specific binding	molecular_function	5	MSTRG.5327;102186543	2	30	138	17827	0.0224622
GO:0042274	ribosomal small subunit biogenesis	biological_process	6	LOC102186358	1	30	12	17827	0.0200143
GO:0032967	positive regulation of collagen biosynthetic process	biological_process	8	SUCO	1	30	13	17827	0.0216646
GO:0005234	extracellularly glutamate-gated ion channel activity	molecular_function	10	102171059	1	30	15	17827	0.0249571
GO:0005791	rough endoplasmic reticulum	cellular_component	7	MSTRG.7126	1	30	15	17827	0.0249571
GO:0051384	response to glucocorticoid	biological_process	8	IL1RN	1	30	13	17827	0.0216646
GO:0048477	oogenesis	biological_process	6	KIAA0430	1	30	14	17827	0.0233122
GO:0043981	histone H4-K5 acetylation	biological_process	12	KANSL3	1	30	15	17827	0.0249571
GO:0006953	acute-phase response	biological_process	8	IL1RN	1	30	15	17827	0.0249571
GO:0043982	histone H4-K8 acetylation	biological_process	12	KANSL3	1	30	15	17827	0.0249571
GO:0007616	long-term memory	biological_process	6	GRIA1	1	30	15	17827	0.0249571
GO:0090026	positive regulation of monocyte chemotaxis	biological_process	9	CXCL10	1	30	16	17827	0.0265993
GO:0017157	regulation of exocytosis	biological_process	7	RIMS1	1	30	16	17827	0.0265993
GO:0043984	histone H4-K16 acetylation	biological_process	12	KANSL3	1	30	16	17827	0.0265993
GO:2000463	positive regulation of excitatory postsynaptic potential	biological_process	9	RIMS1	1	30	17	17827	0.0282389
GO:0050896	response to stimulus	biological_process	3	RIMS1	1	30	17	17827	0.0282389
GO:0046718	viral entry into host cell	biological_process	9	ZNF639	1	30	17	17827	0.0282389
GO:0016020	membrane	cellular_component	3	MSTRG.11016;MSTRG.6668;MSTRG.7126;MSTRG.5198;102184538	5	30	1050	17827	0.0293012
GO:0045662	negative regulation of myoblast differentiation	biological_process	8	CXCL10	1	30	17	17827	0.0282389
GO:0005520	insulin-like growth factor binding	molecular_function	6	102184354	1	30	18	17827	0.0298758
GO:0061025	membrane fusion	biological_process	6	RIMS1	1	30	18	17827	0.0298758
GO:0035235	ionotropic glutamate receptor signaling pathway	biological_process	7	GRIA1	1	30	18	17827	0.0298758
GO:0017134	fibroblast growth factor binding	molecular_function	6	MSTRG.6668	1	30	20	17827	0.0331415
GO:0030331	estrogen receptor binding	molecular_function	9	102186543	1	30	20	17827	0.0331415
GO:0048786	presynaptic active zone	cellular_component	4	102184538	1	30	20	17827	0.0331415
GO:0000123	histone acetyltransferase complex	cellular_component	6	MSTRG.5078	1	30	20	17827	0.0331415
GO:0097193	intrinsic apoptotic signaling pathway	biological_process	6	TP53BP2	1	30	19	17827	0.03151
GO:0050714	positive regulation of protein secretion	biological_process	10	SEC24A	1	30	21	17827	0.0347704
GO:0030521	androgen receptor signaling pathway	biological_process	7	PIAS2	1	30	21	17827	0.0347704
GO:0072332	intrinsic apoptotic signaling pathway by p53 class mediator	biological_process	7	TP53BP2	1	30	22	17827	0.0363967
GO:0051281	positive regulation of release of sequestered calcium ion into cytosol	biological_process	15	CXCL10	1	30	22	17827	0.0363967
GO:0051059	NF-kappaB binding	molecular_function	8	MSTRG.7067	1	30	23	17827	0.0380203
GO:0016604	nuclear body	cellular_component	7	102186543	1	30	23	17827	0.0380203
GO:0050681	androgen receptor binding	molecular_function	9	102186543	1	30	24	17827	0.0396412
GO:0016925	protein sumoylation	biological_process	11	PIAS2	1	30	25	17827	0.0412595
GO:0007269	neurotransmitter secretion	biological_process	6	RIMS1	1	30	25	17827	0.0412595
GO:0032281	AMPA glutamate receptor complex	cellular_component	8	102171059	1	30	26	17827	0.0428752
GO:0019933	cAMP-mediated signaling	biological_process	8	RIMS1	1	30	27	17827	0.0444882
GO:0031623	receptor internalization	biological_process	9	GRIA1	1	30	27	17827	0.0444882
GO:0060291	long-term synaptic potentiation	biological_process	10	RIMS1	1	30	28	17827	0.0460986
GO:0060548	negative regulation of cell death	biological_process	7	WISP2	1	30	29	17827	0.0477064
GO:0042734	presynaptic membrane	cellular_component	5	102184538	1	30	31	17827	0.0509142
GO:0043621	protein self-association	molecular_function	5	MSTRG.278	1	30	33	17827	0.0541114
GO:0048791	calcium ion-regulated exocytosis of neurotransmitter	biological_process	10	102184538	1	30	35	17827	0.0572983
GO:0008284	positive regulation of cell population proliferation	biological_process	7	MSTRG.3329;MSTRG.3067	2	30	234	17827	0.0586803
GO:0001558	regulation of cell growth	biological_process	6	102184354	1	30	38	17827	0.0620591
GO:0010212	response to ionizing radiation	biological_process	6	MSTRG.7067	1	30	38	17827	0.0620591
GO:0009887	animal organ morphogenesis	biological_process	5	102174743	1	30	39	17827	0.0636409
GO:0008009	chemokine activity	molecular_function	8	MSTRG.3067	1	30	40	17827	0.0652201
GO:0006302	double-strand break repair	biological_process	9	MSTRG.11016	1	30	40	17827	0.0652201
GO:0010923	negative regulation of phosphatase activity	biological_process	11	MSTRG.11016	1	30	40	17827	0.0652201
GO:0043433	negative regulation of DNA-binding transcription factor activity	biological_process	6	102186543	1	30	45	17827	0.0730776
GO:0030307	positive regulation of cell growth	biological_process	7	MSTRG.278	1	30	45	17827	0.0730776
GO:0045669	positive regulation of osteoblast differentiation	biological_process	8	MSTRG.7126	1	30	46	17827	0.0746414
GO:0006364	rRNA processing	biological_process	11	MSTRG.1521	1	30	47	17827	0.0762026
GO:0005681	spliceosomal complex	cellular_component	6	MSTRG.6668	1	30	48	17827	0.0777613
GO:0007417	central nervous system development	biological_process	6	MSTRG.7067	1	30	49	17827	0.0793175
GO:0043197	dendritic spine	cellular_component	7	102171059	1	30	50	17827	0.0808711
GO:0042391	regulation of membrane potential	biological_process	5	102184538	1	30	50	17827	0.0808711
GO:0030170	pyridoxal phosphate binding	molecular_function	6	MSTRG.7523	1	30	50	17827	0.0808711
GO:0006888	endoplasmic reticulum to Golgi vesicle-mediated transport	biological_process	7	MSTRG.3366	1	30	51	17827	0.0824222
GO:0005654	nucleoplasm	cellular_component	6	102174743;MSTRG.6668;102186543;MSTRG.192;MSTRG.278	5	30	1404	17827	0.082744
GO:0006887	exocytosis	biological_process	7	102184538	1	30	52	17827	0.0839708
GO:0050790	regulation of catalytic activity	biological_process	5	102184538	1	30	52	17827	0.0839708
GO:0006935	chemotaxis	biological_process	5	MSTRG.3067	1	30	53	17827	0.0855169
GO:0070098	chemokine-mediated signaling pathway	biological_process	7	MSTRG.3067	1	30	55	17827	0.0886014
GO:0071222	cellular response to lipopolysaccharide	biological_process	8	MSTRG.3067	1	30	56	17827	0.0901399
GO:0005777	peroxisome	cellular_component	7	MSTRG.11016	1	30	57	17827	0.0916758
GO:0006629	lipid metabolic process	biological_process	5	MSTRG.5275	1	30	58	17827	0.0932093
GO:0008021	synaptic vesicle	cellular_component	4	102171059	1	30	58	17827	0.0932093
GO:0005788	endoplasmic reticulum lumen	cellular_component	7	MSTRG.3329	1	30	60	17827	0.0962687
GO:0002039	p53 binding	molecular_function	5	MSTRG.7067	1	30	61	17827	0.0977947
GO:0007267	cell-cell signaling	biological_process	5	102184354	1	30	63	17827	0.100839
GO:0016605	PML body	cellular_component	8	102186543	1	30	67	17827	0.106898
GO:0017124	SH3 domain binding	molecular_function	6	102184538	1	30	67	17827	0.106898
GO:0000786	nucleosome	cellular_component	5	102169782	1	30	68	17827	0.108407
GO:0005789	endoplasmic reticulum membrane	cellular_component	5	MSTRG.975;MSTRG.3366	2	30	339	17827	0.110806
GO:0010468	regulation of gene expression	biological_process	7	MSTRG.11016	1	30	71	17827	0.112918
GO:0005178	integrin binding	molecular_function	6	102184354	1	30	72	17827	0.114417
GO:0055037	recycling endosome	cellular_component	8	102171059	1	30	72	17827	0.114417
GO:0005634	nucleus	cellular_component	6	MSTRG.5078;102174743;MSTRG.278;MSTRG.7067;102186543;MSTRG.1521;102169782;MSTRG.5327	8	30	2987	17827	0.116212
GO:0034220	ion transmembrane transport	biological_process	7	102171059	1	30	77	17827	0.121874
GO:0044325	ion channel binding	molecular_function	5	102184538	1	30	78	17827	0.123358
GO:0022627	cytosolic small ribosomal subunit	cellular_component	8	MSTRG.1521	1	30	83	17827	0.130743
GO:0007601	visual perception	biological_process	8	102184538	1	30	83	17827	0.130743
GO:0042593	glucose homeostasis	biological_process	8	MSTRG.1521	1	30	83	17827	0.130743
GO:0014069	postsynaptic density	cellular_component	5	102171059	1	30	86	17827	0.135145
GO:0032496	response to lipopolysaccharide	biological_process	7	MSTRG.3067	1	30	89	17827	0.139525
GO:0016055	Wnt signaling pathway	biological_process	7	102174743	1	30	91	17827	0.142433
GO:0016874	ligase activity	molecular_function	4	102186543	1	30	93	17827	0.145332
GO:0005615	extracellular space	cellular_component	4	102184354;MSTRG.3067;MSTRG.5275	3	30	834	17827	0.163652
GO:0045211	postsynaptic membrane	cellular_component	5	102171059	1	30	108	17827	0.166772
GO:0030027	lamellipodium	cellular_component	6	102183373	1	30	110	17827	0.169592
GO:0017137	Rab GTPase binding	molecular_function	9	102184538	1	30	110	17827	0.169592
GO:0019221	cytokine-mediated signaling pathway	biological_process	6	MSTRG.5275	1	30	111	17827	0.170998
GO:0051607	defense response to virus	biological_process	5	MSTRG.3067	1	30	113	17827	0.173803
GO:0007507	heart development	biological_process	6	MSTRG.7067	1	30	114	17827	0.175202
GO:0005576	extracellular region	cellular_component	3	102184352;MSTRG.3329	2	30	452	17827	0.17593
GO:0007268	chemical synaptic transmission	biological_process	9	102171059	1	30	118	17827	0.180776
GO:0005125	cytokine activity	molecular_function	7	MSTRG.5275	1	30	122	17827	0.186314
GO:0016607	nuclear speck	cellular_component	8	102186543	1	30	125	17827	0.190443
GO:0005759	mitochondrial matrix	cellular_component	7	MSTRG.192	1	30	125	17827	0.190443
GO:0010628	positive regulation of gene expression	biological_process	8	102184538	1	30	128	17827	0.194553
GO:0044212	transcription regulatory region DNA binding	molecular_function	7	MSTRG.278	1	30	131	17827	0.198642
GO:0009897	external side of plasma membrane	cellular_component	5	MSTRG.3067	1	30	148	17827	0.221436
GO:0043025	neuronal cell body	cellular_component	5	102171059	1	30	152	17827	0.226708
GO:0003924	GTPase activity	molecular_function	9	MSTRG.1338	1	30	176	17827	0.257621
GO:0005515	protein binding	molecular_function	4	102186543;102174743;102184538	3	30	1049	17827	0.258018
GO:0008134	transcription factor binding	molecular_function	5	102186543	1	30	180	17827	0.262656
GO:0007155	cell adhesion	biological_process	4	102184354	1	30	186	17827	0.270146
GO:0000139	Golgi membrane	cellular_component	7	MSTRG.3366	1	30	189	17827	0.273863
GO:0006954	inflammatory response	biological_process	6	MSTRG.3067	1	30	194	17827	0.280018
GO:0007283	spermatogenesis	biological_process	7	102186543	1	30	194	17827	0.280018
GO:0006955	immune response	biological_process	4	MSTRG.3067	1	30	210	17827	0.299377
GO:0006351	transcription, DNA-templated	biological_process	8	102174743;102186543	2	30	657	17827	0.303745
GO:0031625	ubiquitin protein ligase binding	molecular_function	7	102186543	1	30	217	17827	0.307688
GO:0043066	negative regulation of apoptotic process	biological_process	9	MSTRG.6668	1	30	232	17827	0.325176
GO:0000978	RNA polymerase II proximal promoter sequence-specific DNA binding	molecular_function	10	MSTRG.278	1	30	242	17827	0.336597
GO:0045944	positive regulation of transcription by RNA polymerase II	biological_process	10	102186543;MSTRG.278	2	30	720	17827	0.343177
GO:0003677	DNA binding	molecular_function	6	102169782;102186543	2	30	726	17827	0.346906
GO:0045892	negative regulation of transcription, DNA-templated	biological_process	9	MSTRG.278	1	30	258	17827	0.354483
GO:0005887	integral component of plasma membrane	cellular_component	6	102168759;MSTRG.8406	2	30	739	17827	0.354964
GO:0006412	translation	biological_process	8	MSTRG.1521	1	30	260	17827	0.356686
GO:0045893	positive regulation of transcription, DNA-templated	biological_process	9	102186543	1	30	263	17827	0.359976
GO:0006357	regulation of transcription by RNA polymerase II	biological_process	9	102186543	1	30	295	17827	0.394077
GO:0003723	RNA binding	molecular_function	6	MSTRG.11016	1	30	297	17827	0.396149
GO:0019901	protein kinase binding	molecular_function	7	MSTRG.5327	1	30	299	17827	0.398214
GO:0006366	transcription by RNA polymerase II	biological_process	9	MSTRG.278	1	30	316	17827	0.415494
GO:0009986	cell surface	cellular_component	4	102171059	1	30	317	17827	0.416495
GO:0006355	regulation of transcription, DNA-templated	biological_process	8	102186543;102174743	2	30	842	17827	0.417567
GO:0046982	protein heterodimerization activity	molecular_function	6	102169782	1	30	332	17827	0.431318
GO:0003735	structural constituent of ribosome	molecular_function	4	MSTRG.1521	1	30	335	17827	0.434239
GO:0000166	nucleotide binding	molecular_function	5	MSTRG.11016	1	30	342	17827	0.440998
GO:0005813	centrosome	cellular_component	7	MSTRG.5327	1	30	345	17827	0.44387
GO:0042802	identical protein binding	molecular_function	5	MSTRG.7067	1	30	383	17827	0.479043
GO:0005525	GTP binding	molecular_function	8	MSTRG.1338	1	30	384	17827	0.479939
GO:0008270	zinc ion binding	molecular_function	8	102186543;MSTRG.3366	2	30	1039	17827	0.528681
GO:0007186	G protein-coupled receptor signaling pathway	biological_process	5	MSTRG.3067	1	30	481	17827	0.560116
GO:0005783	endoplasmic reticulum	cellular_component	6	102171059	1	30	486	17827	0.563907
GO:0042803	protein homodimerization activity	molecular_function	6	MSTRG.7523	1	30	524	17827	0.591706
GO:0003700	DNA-binding transcription factor activity	molecular_function	4	MSTRG.278	1	30	545	17827	0.606325
GO:0046872	metal ion binding	molecular_function	6	MSTRG.278;102184538	2	30	1224	17827	0.620057
GO:0055114	oxidation-reduction process	biological_process	4	MSTRG.192	1	30	601	17827	0.642879
GO:0005730	nucleolus	cellular_component	6	MSTRG.5078	1	30	644	17827	0.668698
GO:0005622	intracellular	cellular_component	4	102184538	1	30	695	17827	0.696985
GO:0070062	extracellular exosome	cellular_component	7	MSTRG.5275;102184354;102184538	3	30	2105	17827	0.704706
GO:0016021	integral component of membrane	cellular_component	5	MSTRG.286;102183373;MSTRG.11814;MSTRG.975;102172674	5	30	3715	17827	0.779426
GO:0005739	mitochondrion	cellular_component	6	MSTRG.7523	1	30	876	17827	0.779726
GO:0005829	cytosol	cellular_component	6	102184538	1	30	1233	17827	0.883749
GO:0005886	plasma membrane	cellular_component	4	102184538	1	30	1793	17827	0.958531
GO:0005737	cytoplasm	cellular_component	5	MSTRG.7067;MSTRG.5327	2	30	3222	17827	0.980815

## Sheet: Down-regulated genes
S7 GO enrichment analysis of downregulated differentially expressed genes (DEGs) between KC and KR group.
GO_ID	GO_Term	GO_function	GO_class	Genes	S gene number	TS gene number	B gene number	TB gene number	pvalue	Note: S gene number: the number of significant DEGs which annotated to a specific GO term; TS gene number: the number of significant DEGs; B gene number: the number of genes which annotated to a specific GO term; TB gene number: the total number of genes.
GO:0034707	chloride channel complex	cellular_component	7	MSTRG.12078;MSTRG.1414	2	31	21	17827	0.000602037
GO:0016323	basolateral plasma membrane	cellular_component	5	MSTRG.12078;MSTRG.12464;102191136	3	31	100	17827	0.000686831
GO:1902476	chloride transmembrane transport	biological_process	10	CLCC1;BEST1	2	31	70	17827	0.00656631
GO:0034220	ion transmembrane transport	biological_process	7	GJD3;AQP3	2	31	77	17827	0.0078959
GO:0032849	positive regulation of cellular pH reduction	biological_process	7	CA7	1	31	1	17827	0.00173894
GO:0044220	host cell perinuclear region of cytoplasm	cellular_component	7	MSTRG.10822	1	31	1	17827	0.00173894
GO:0005254	chloride channel activity	molecular_function	8	MSTRG.12078;MSTRG.1414	2	31	39	17827	0.00208334
GO:0016324	apical plasma membrane	cellular_component	5	102180405;MSTRG.12464;108635390	3	31	169	17827	0.00309558
GO:0004450	isocitrate dehydrogenase (NADP+) activity	molecular_function	8	MSTRG.796	1	31	2	17827	0.00347494
GO:0036156	inner dynein arm	cellular_component	7	102169141	1	31	2	17827	0.00347494
GO:2001225	regulation of chloride transport	biological_process	9	CA7	1	31	1	17827	0.00173894
GO:0016263	glycoprotein-N-acetylgalactosamine 3-beta-galactosyltransferase activity	molecular_function	9	MSTRG.2102	1	31	2	17827	0.00347494
GO:0002684	positive regulation of immune system process	biological_process	6	AQP3	1	31	1	17827	0.00173894
GO:0000104	succinate dehydrogenase activity	molecular_function	6	MSTRG.1723	1	31	2	17827	0.00347494
GO:0016267	O-glycan processing, core 1	biological_process	12	C1GALT1	1	31	2	17827	0.00347494
GO:0030348	syntaxin-3 binding	molecular_function	7	108635390	1	31	2	17827	0.00347494
GO:0001909	leukocyte mediated cytotoxicity	biological_process	4	LOC108635390	1	31	2	17827	0.00347494
GO:0004585	ornithine carbamoyltransferase activity	molecular_function	7	MSTRG.12432	1	31	2	17827	0.00347494
GO:0006593	ornithine catabolic process	biological_process	11	OTC	1	31	2	17827	0.00347494
GO:0097272	ammonia homeostasis	biological_process	7	OTC	1	31	2	17827	0.00347494
GO:0031995	insulin-like growth factor II binding	molecular_function	7	MSTRG.8968	1	31	3	17827	0.00520803
GO:0006102	isocitrate metabolic process	biological_process	9	IDH1	1	31	3	17827	0.00520803
GO:0019240	citrulline biosynthetic process	biological_process	11	OTC	1	31	3	17827	0.00520803
GO:0005749	mitochondrial respiratory chain complex II, succinate dehydrogenase complex (ubiquinone)	cellular_component	7	MSTRG.1723	1	31	3	17827	0.00520803
GO:0043567	regulation of insulin-like growth factor receptor signaling pathway	biological_process	8	IGFBP4	1	31	3	17827	0.00520803
GO:0016264	gap junction assembly	biological_process	8	GJD3	1	31	3	17827	0.00520803
GO:0006121	mitochondrial electron transport, succinate to ubiquinone	biological_process	8	SDHC	1	31	3	17827	0.00520803
GO:0070295	renal water absorption	biological_process	7	AQP3	1	31	4	17827	0.0069382
GO:0015204	urea transmembrane transporter activity	molecular_function	6	102191136	1	31	4	17827	0.0069382
GO:0010638	positive regulation of organelle organization	biological_process	8	LMAN1	1	31	4	17827	0.0069382
GO:0071918	urea transmembrane transport	biological_process	9	AQP3	1	31	5	17827	0.00866546
GO:0044194	cytolytic granule	cellular_component	9	108635390	1	31	5	17827	0.00866546
GO:0030321	transepithelial chloride transport	biological_process	10	BEST1	1	31	5	17827	0.00866546
GO:0060576	intestinal epithelial cell development	biological_process	8	C1GALT1	1	31	5	17827	0.00866546
GO:0034219	carbohydrate transmembrane transport	biological_process	8	AQP3	1	31	5	17827	0.00866546
GO:0070820	tertiary granule	cellular_component	9	108635390	1	31	5	17827	0.00866546
GO:0031994	insulin-like growth factor I binding	molecular_function	7	MSTRG.8968	1	31	5	17827	0.00866546
GO:0061014	positive regulation of mRNA catabolic process	biological_process	9	CNOT8	1	31	5	17827	0.00866546
GO:0043312	neutrophil degranulation	biological_process	9	LOC108635390	1	31	5	17827	0.00866546
GO:0022627	cytosolic small ribosomal subunit	cellular_component	8	MSTRG.888;MSTRG.6900	2	31	83	17827	0.00912395
GO:0032230	positive regulation of synaptic transmission, GABAergic	biological_process	10	CA7	1	31	6	17827	0.0103898
GO:0005579	membrane attack complex	cellular_component	6	MSTRG.1262	1	31	6	17827	0.0103898
GO:0015793	glycerol transport	biological_process	8	AQP3	1	31	7	17827	0.0121113
GO:0015254	glycerol channel activity	molecular_function	7	102191136	1	31	7	17827	0.0121113
GO:0000050	urea cycle	biological_process	8	OTC	1	31	7	17827	0.0121113
GO:0044342	type B pancreatic cell proliferation	biological_process	5	IGFBP4	1	31	7	17827	0.0121113
GO:0000288	nuclear-transcribed mRNA catabolic process, deadenylation-dependent decay	biological_process	12	CNOT8	1	31	8	17827	0.0138298
GO:0042582	azurophil granule	cellular_component	10	108635390	1	31	8	17827	0.0138298
GO:0043568	positive regulation of insulin-like growth factor receptor signaling pathway	biological_process	9	IGFBP4	1	31	8	17827	0.0138298
GO:0015250	water channel activity	molecular_function	7	102191136	1	31	8	17827	0.0138298
GO:0005794	Golgi apparatus	cellular_component	6	MSTRG.10822;102180405;MSTRG.1361;MSTRG.1414	4	31	548	17827	0.0143923
GO:0009992	cellular water homeostasis	biological_process	8	AQP3	1	31	9	17827	0.0155455
GO:0030134	COPII-coated ER to Golgi transport vesicle	cellular_component	8	MSTRG.10822	1	31	9	17827	0.0155455
GO:0043928	exonucleolytic catabolism of deadenylated mRNA	biological_process	13	CNOT8	1	31	9	17827	0.0155455
GO:0042953	lipoprotein transport	biological_process	10	CUBN	1	31	9	17827	0.0155455
GO:0017075	syntaxin-1 binding	molecular_function	7	108635390	1	31	9	17827	0.0155455
GO:0016597	amino acid binding	molecular_function	7	MSTRG.12432	1	31	10	17827	0.0172582
GO:0006103	2-oxoglutarate metabolic process	biological_process	9	IDH1	1	31	10	17827	0.0172582
GO:0050908	detection of light stimulus involved in visual perception	biological_process	9	BEST1	1	31	10	17827	0.0172582
GO:0051924	regulation of calcium ion transport	biological_process	9	BEST1	1	31	11	17827	0.0189681
GO:0036159	inner dynein arm assembly	biological_process	9	DNAH7	1	31	11	17827	0.0189681
GO:0010906	regulation of glucose metabolic process	biological_process	9	IGFBP4	1	31	12	17827	0.0206751
GO:0004535	poly(A)-specific ribonuclease activity	molecular_function	10	MSTRG.3254	1	31	12	17827	0.0206751
GO:0005537	mannose binding	molecular_function	6	MSTRG.10822	1	31	12	17827	0.0206751
GO:0030014	CCR4-NOT complex	cellular_component	4	MSTRG.3254	1	31	12	17827	0.0206751
GO:0005509	calcium ion binding	molecular_function	7	MSTRG.12464;MSTRG.2623;102169141;102180405	4	31	614	17827	0.0209722
GO:0060173	limb development	biological_process	6	SLC39A1	1	31	13	17827	0.0223792
GO:0042581	specific granule	cellular_component	9	108635390	1	31	13	17827	0.0223792
GO:0006306	DNA methylation	biological_process	10	GATAD2B	1	31	13	17827	0.0223792
GO:0006956	complement activation	biological_process	5	C1S	1	31	13	17827	0.0223792
GO:0042476	odontogenesis	biological_process	6	AQP3	1	31	14	17827	0.0240805
GO:0030017	sarcomere	cellular_component	5	MSTRG.10822	1	31	15	17827	0.0257789
GO:0071577	zinc ion transmembrane transport	biological_process	11	SLC39A1	1	31	16	17827	0.0274744
GO:0016581	NuRD complex	cellular_component	8	MSTRG.1576	1	31	16	17827	0.0274744
GO:0015698	inorganic anion transport	biological_process	8	LOC102189282	1	31	17	17827	0.0291671
GO:0003341	cilium movement	biological_process	6	DNAH7	1	31	17	17827	0.0291671
GO:0005922	connexin complex	cellular_component	6	106503245	1	31	17	17827	0.0291671
GO:0007029	endoplasmic reticulum organization	biological_process	6	LMAN1	1	31	17	17827	0.0291671
GO:0006904	vesicle docking involved in exocytosis	biological_process	7	LOC108635390	1	31	18	17827	0.0308569
GO:0005216	ion channel activity	molecular_function	6	106503245	1	31	19	17827	0.0325439
GO:0004089	carbonate dehydratase activity	molecular_function	7	MSTRG.7913	1	31	19	17827	0.0325439
GO:0090503	RNA phosphodiester bond hydrolysis, exonucleolytic	biological_process	10	CNOT8	1	31	21	17827	0.0359094
GO:0005452	inorganic anion exchanger activity	molecular_function	8	MSTRG.12110	1	31	22	17827	0.0375878
GO:0005385	zinc ion transmembrane transporter activity	molecular_function	10	MSTRG.1579	1	31	22	17827	0.0375878
GO:0015347	sodium-independent organic anion transmembrane transporter activity	molecular_function	8	MSTRG.12110	1	31	23	17827	0.0392635
GO:0032526	response to retinoic acid	biological_process	6	AQP3	1	31	23	17827	0.0392635
GO:0006099	tricarboxylic acid cycle	biological_process	5	SDHC	1	31	23	17827	0.0392635
GO:0043044	ATP-dependent chromatin remodeling	biological_process	7	GATAD2B	1	31	24	17827	0.0409363
GO:0048701	embryonic cranial skeleton morphogenesis	biological_process	8	SLC39A1	1	31	24	17827	0.0409363
GO:0007154	cell communication	biological_process	4	GJD3	1	31	24	17827	0.0409363
GO:0043252	sodium-independent organic anion transport	biological_process	9	LOC102189282	1	31	24	17827	0.0409363
GO:0031492	nucleosomal DNA binding	molecular_function	8	MSTRG.1576	1	31	25	17827	0.0426063
GO:0005096	GTPase activator activity	molecular_function	6	102191544;MSTRG.1361	2	31	199	17827	0.0466527
GO:0007017	microtubule-based process	biological_process	4	TUBA1C	1	31	29	17827	0.0492582
GO:0006955	immune response	biological_process	4	MSTRG.12199;MSTRG.1262	2	31	210	17827	0.0513622
GO:0006730	one-carbon metabolic process	biological_process	5	MSTRG.7913	1	31	31	17827	0.0525673
GO:0004197	cysteine-type endopeptidase activity	molecular_function	8	MSTRG.12199	1	31	32	17827	0.0542177
GO:0051603	proteolysis involved in cellular protein catabolic process	biological_process	8	MSTRG.12199	1	31	35	17827	0.0591522
GO:0031338	regulation of vesicle fusion	biological_process	8	MSTRG.1361	1	31	38	17827	0.0640618
GO:0001558	regulation of cell growth	biological_process	6	MSTRG.8968	1	31	38	17827	0.0640618
GO:0070062	extracellular exosome	cellular_component	7	MSTRG.428;102180405;MSTRG.10237;108635390;MSTRG.2623;MSTRG.10822;MSTRG.1262	7	31	2105	17827	0.0655317
GO:0030139	endocytic vesicle	cellular_component	7	102180405	1	31	39	17827	0.0656928
GO:0005793	endoplasmic reticulum-Golgi intermediate compartment	cellular_component	6	MSTRG.10822	1	31	40	17827	0.0673211
GO:0005903	brush border	cellular_component	5	102180405	1	31	44	17827	0.0738067
GO:0042147	retrograde transport, endosome to Golgi	biological_process	8	MSTRG.1361	1	31	44	17827	0.0738067
GO:0006412	translation	biological_process	8	MSTRG.6900;MSTRG.888	2	31	260	17827	0.0747367
GO:0019843	rRNA binding	molecular_function	7	MSTRG.888	1	31	45	17827	0.0754213
GO:0031201	SNARE complex	cellular_component	6	108635390	1	31	45	17827	0.0754213
GO:0005743	mitochondrial inner membrane	cellular_component	6	MSTRG.12432;MSTRG.1723	2	31	268	17827	0.0787473
GO:0000980	RNA polymerase II distal enhancer sequence-specific DNA binding	molecular_function	10	MSTRG.1576	1	31	49	17827	0.0818524
GO:0006888	endoplasmic reticulum to Golgi vesicle-mediated transport	biological_process	7	MSTRG.10822	1	31	51	17827	0.0850517
GO:0043410	positive regulation of MAPK cascade	biological_process	11	MSTRG.8968	1	31	51	17827	0.0850517
GO:0009055	electron transfer activity	molecular_function	5	MSTRG.1723	1	31	52	17827	0.0866473
GO:0001822	kidney development	biological_process	6	MSTRG.2102	1	31	52	17827	0.0866473
GO:0005905	clathrin-coated pit	cellular_component	4	102180405	1	31	53	17827	0.0882402
GO:0005200	structural constituent of cytoskeleton	molecular_function	4	MSTRG.2275	1	31	55	17827	0.091418
GO:0007030	Golgi organization	biological_process	6	MSTRG.10822	1	31	59	17827	0.0977414
GO:0003777	microtubule motor activity	molecular_function	10	102169141	1	31	66	17827	0.108705
GO:0003735	structural constituent of ribosome	molecular_function	4	MSTRG.6900;MSTRG.888	2	31	335	17827	0.114753
GO:0072562	blood microparticle	cellular_component	4	MSTRG.2623	1	31	72	17827	0.118
GO:0012505	endomembrane system	cellular_component	4	MSTRG.1361	1	31	79	17827	0.128725
GO:0005887	integral component of plasma membrane	cellular_component	6	MSTRG.12110;102191136;MSTRG.12078	3	31	739	17827	0.135774
GO:0006898	receptor-mediated endocytosis	biological_process	8	102180405	1	31	86	17827	0.139324
GO:0002230	positive regulation of defense response to virus by host	biological_process	9	MSTRG.7913	1	31	103	17827	0.164547
GO:0017137	Rab GTPase binding	molecular_function	9	MSTRG.1361	1	31	110	17827	0.174724
GO:0005911	cell-cell junction	cellular_component	4	102191136	1	31	112	17827	0.17761
GO:0016887	ATPase activity	molecular_function	9	102169141	1	31	112	17827	0.17761
GO:0001525	angiogenesis	biological_process	5	MSTRG.2102	1	31	124	17827	0.194719
GO:0005764	lysosome	cellular_component	8	MSTRG.12199	1	31	131	17827	0.20454
GO:0020037	heme binding	molecular_function	6	MSTRG.1723	1	31	132	17827	0.205934
GO:0005783	endoplasmic reticulum	cellular_component	6	MSTRG.1414;102180405	2	31	486	17827	0.206643
GO:0000790	nuclear chromatin	cellular_component	7	MSTRG.1576	1	31	137	17827	0.212866
GO:0005768	endosome	cellular_component	7	102180405	1	31	146	17827	0.225196
GO:0004252	serine-type endopeptidase activity	molecular_function	8	MSTRG.2623	1	31	147	17827	0.226555
GO:0005874	microtubule	cellular_component	7	MSTRG.2275	1	31	159	17827	0.242678
GO:0000977	RNA polymerase II regulatory region sequence-specific DNA binding	molecular_function	9	MSTRG.1576	1	31	160	17827	0.244006
GO:0001701	in utero embryonic development	biological_process	8	MSTRG.1579	1	31	162	17827	0.246657
GO:0003924	GTPase activity	molecular_function	9	MSTRG.2275	1	31	176	17827	0.264963
GO:0000287	magnesium ion binding	molecular_function	7	MSTRG.796	1	31	177	17827	0.266253
GO:0006886	intracellular protein transport	biological_process	10	MSTRG.1361	1	31	183	17827	0.273953
GO:0055085	transmembrane transport	biological_process	6	MSTRG.12110	1	31	187	17827	0.279043
GO:0005856	cytoskeleton	cellular_component	6	106502497	1	31	220	17827	0.319735
GO:0008284	positive regulation of cell population proliferation	biological_process	7	MSTRG.3254	1	31	234	17827	0.336318
GO:0000978	RNA polymerase II proximal promoter sequence-specific DNA binding	molecular_function	10	MSTRG.1576	1	31	242	17827	0.345618
GO:0004674	protein serine/threonine kinase activity	molecular_function	8	MSTRG.10237	1	31	250	17827	0.354792
GO:0005829	cytosol	cellular_component	6	MSTRG.1361;108635390;MSTRG.7913	3	31	1233	17827	0.36359
GO:0009986	cell surface	cellular_component	4	106503245	1	31	317	17827	0.426889
GO:0005615	extracellular space	cellular_component	4	MSTRG.8968;MSTRG.12199	2	31	834	17827	0.429176
GO:0006468	protein phosphorylation	biological_process	9	MSTRG.10237	1	31	321	17827	0.430937
GO:0006508	proteolysis	biological_process	7	MSTRG.2623	1	31	347	17827	0.456583
GO:0042802	identical protein binding	molecular_function	5	MSTRG.2623	1	31	383	17827	0.490255
GO:0005525	GTP binding	molecular_function	8	MSTRG.2275	1	31	384	17827	0.491161
GO:0043547	positive regulation of GTPase activity	biological_process	8	102191544	1	31	403	17827	0.508079
GO:0008270	zinc ion binding	molecular_function	8	MSTRG.7913;MSTRG.1576	2	31	1039	17827	0.546559
GO:0016020	membrane	cellular_component	3	MSTRG.6900;MSTRG.12199	2	31	1050	17827	0.552399
GO:0000122	negative regulation of transcription by RNA polymerase II	biological_process	10	MSTRG.1576	1	31	509	17827	0.592929
GO:0042803	protein homodimerization activity	molecular_function	6	102180405	1	31	524	17827	0.603727
GO:0003676	nucleic acid binding	molecular_function	5	MSTRG.3254	1	31	539	17827	0.614249
GO:0003700	DNA-binding transcription factor activity	molecular_function	4	MSTRG.1576	1	31	545	17827	0.618381
GO:0046872	metal ion binding	molecular_function	6	MSTRG.2102;MSTRG.1723	2	31	1224	17827	0.638047
GO:0016021	integral component of membrane	cellular_component	5	MSTRG.1579;106503245;MSTRG.9520;MSTRG.10822;MSTRG.1723;MSTRG.2102	6	31	3715	17827	0.650701
GO:0005524	ATP binding	molecular_function	5	102169141;MSTRG.10237	2	31	1299	17827	0.671015
GO:0006351	transcription, DNA-templated	biological_process	8	MSTRG.3254	1	31	657	17827	0.688097
GO:0005622	intracellular	cellular_component	4	MSTRG.1361	1	31	695	17827	0.708819
GO:0005886	plasma membrane	cellular_component	4	MSTRG.1579;102191544	2	31	1793	17827	0.833195
GO:0005737	cytoplasm	cellular_component	5	102169141;MSTRG.2275;102191136;102191544	4	31	3222	17827	0.837201
GO:0005634	nucleus	cellular_component	6	MSTRG.1414;MSTRG.3254;102191136	3	31	2987	17827	0.911615
GO:0006086	acetyl-CoA biosynthetic process from pyruvate	biological_process	10	1	120	5	18274	0.0324086
GO:0003872	6-phosphofructokinase activity	molecular_function	8	1	120	5	18274	0.0324086
GO:0061073	ciliary body morphogenesis	biological_process	5	1	120	5	18274	0.0324086
GO:0004090	carbonyl reductase (NADPH) activity	molecular_function	7	1	120	5	18274	0.0324086
GO:0033148	positive regulation of intracellular estrogen receptor signaling pathway	biological_process	10	1	120	5	18274	0.0324086
GO:0051880	G-quadruplex DNA binding	molecular_function	7	1	120	5	18274	0.0324086
GO:0034604	pyruvate dehydrogenase (NAD+) activity	molecular_function	8	1	120	5	18274	0.0324086
GO:0048029	monosaccharide binding	molecular_function	5	1	120	5	18274	0.0324086
GO:0043141	ATP-dependent 5'-3' DNA helicase activity	molecular_function	12	1	120	5	18274	0.0324086
GO:0048251	elastic fiber assembly	biological_process	7	1	120	5	18274	0.0324086
GO:0061621	canonical glycolysis	biological_process	6	1	120	5	18274	0.0324086
GO:0048496	maintenance of organ identity	biological_process	8	1	120	5	18274	0.0324086
GO:0050765	negative regulation of phagocytosis	biological_process	8	1	120	5	18274	0.0324086
GO:0030321	transepithelial chloride transport	biological_process	10	1	120	5	18274	0.0324086
GO:2000781	positive regulation of double-strand break repair	biological_process	11	1	120	5	18274	0.0324086
GO:0042373	vitamin K metabolic process	biological_process	7	1	120	5	18274	0.0324086
GO:0048708	astrocyte differentiation	biological_process	7	1	120	5	18274	0.0324086
GO:0005903	brush border	cellular_component	5	2	120	44	18274	0.0338139
GO:0032091	negative regulation of protein binding	biological_process	7	2	120	44	18274	0.0338139
GO:0043129	surfactant homeostasis	biological_process	9	1	120	6	18274	0.0387643
GO:0048009	insulin-like growth factor receptor signaling pathway	biological_process	8	1	120	6	18274	0.0387643
GO:0030621	U4 snRNA binding	molecular_function	8	1	120	6	18274	0.0387643
GO:0030285	integral component of synaptic vesicle membrane	cellular_component	7	1	120	6	18274	0.0387643
GO:0008061	chitin binding	molecular_function	5	1	120	6	18274	0.0387643
GO:0060736	prostate gland growth	biological_process	5	1	120	6	18274	0.0387643
GO:0008519	ammonium transmembrane transporter activity	molecular_function	7	1	120	6	18274	0.0387643
GO:0021902	commitment of neuronal cell to specific neuron type in forebrain	biological_process	8	1	120	6	18274	0.0387643
GO:0032287	peripheral nervous system myelin maintenance	biological_process	8	1	120	6	18274	0.0387643
GO:0070886	positive regulation of calcineurin-NFAT signaling cascade	biological_process	12	1	120	6	18274	0.0387643
GO:0045821	positive regulation of glycolytic process	biological_process	11	1	120	6	18274	0.0387643
GO:0033130	acetylcholine receptor binding	molecular_function	6	1	120	6	18274	0.0387643
GO:0070061	fructose binding	molecular_function	6	1	120	6	18274	0.0387643
GO:0003073	regulation of systemic arterial blood pressure	biological_process	6	1	120	6	18274	0.0387643
GO:0032703	negative regulation of interleukin-2 production	biological_process	8	1	120	6	18274	0.0387643
GO:0030166	proteoglycan biosynthetic process	biological_process	9	1	120	6	18274	0.0387643
GO:0051205	protein insertion into membrane	biological_process	8	1	120	6	18274	0.0387643
GO:0005179	hormone activity	molecular_function	7	2	120	48	18274	0.0396447
GO:0071456	cellular response to hypoxia	biological_process	6	2	120	49	18274	0.041158
GO:0043410	positive regulation of MAPK cascade	biological_process	11	2	120	51	18274	0.0442487
GO:0007165	signal transduction	biological_process	4	6	120	392	18274	0.0447113
GO:0043278	response to morphine	biological_process	6	1	120	7	18274	0.0450785
GO:0010613	positive regulation of cardiac muscle hypertrophy	biological_process	10	1	120	7	18274	0.0450785
GO:0002011	morphogenesis of an epithelial sheet	biological_process	7	1	120	7	18274	0.0450785
GO:0060740	prostate gland epithelium morphogenesis	biological_process	7	1	120	7	18274	0.0450785
GO:0006833	water transport	biological_process	7	1	120	7	18274	0.0450785
GO:0050786	RAGE receptor binding	molecular_function	6	1	120	7	18274	0.0450785
GO:0003094	glomerular filtration	biological_process	7	1	120	7	18274	0.0450785
GO:0010457	centriole-centriole cohesion	biological_process	5	1	120	7	18274	0.0450785
GO:0048245	eosinophil chemotaxis	biological_process	7	1	120	7	18274	0.0450785
GO:0051602	response to electrical stimulus	biological_process	5	1	120	7	18274	0.0450785
GO:0015793	glycerol transport	biological_process	8	1	120	7	18274	0.0450785
GO:0045254	pyruvate dehydrogenase complex	cellular_component	6	1	120	7	18274	0.0450785
GO:0006002	fructose 6-phosphate metabolic process	biological_process	7	1	120	7	18274	0.0450785
GO:0046889	positive regulation of lipid biosynthetic process	biological_process	8	1	120	7	18274	0.0450785
GO:0048156	tau protein binding	molecular_function	6	1	120	7	18274	0.0450785
GO:0008440	inositol-1,4,5-trisphosphate 3-kinase activity	molecular_function	8	1	120	7	18274	0.0450785
GO:0048168	regulation of neuronal synaptic plasticity	biological_process	10	1	120	7	18274	0.0450785
GO:0050953	sensory perception of light stimulus	biological_process	7	1	120	7	18274	0.0450785
GO:0090051	negative regulation of cell migration involved in sprouting angiogenesis	biological_process	12	1	120	7	18274	0.0450785
GO:0010669	epithelial structure maintenance	biological_process	8	1	120	7	18274	0.0450785
GO:0061549	sympathetic ganglion development	biological_process	7	1	120	7	18274	0.0450785
GO:0015254	glycerol channel activity	molecular_function	7	1	120	7	18274	0.0450785
GO:0046598	positive regulation of viral entry into host cell	biological_process	10	1	120	7	18274	0.0450785
GO:0006032	chitin catabolic process	biological_process	8	1	120	7	18274	0.0450785
GO:0004568	chitinase activity	molecular_function	7	1	120	7	18274	0.0450785
GO:0006357	regulation of transcription from RNA polymerase II promoter	biological_process	9	5	120	295	18274	0.0451767
GO:0050790	regulation of catalytic activity	biological_process	5	2	120	52	18274	0.0458255
GO:0019900	kinase binding	molecular_function	6	2	120	52	18274	0.0458255
