# Supplementary material for: Transcriptome analysis reveals liver metabolism programming in kids from nutritional restricted goats during mid-gestation
Source: PeerJ. 2021 Jan 29;9:e10593. doi: 10.7717/peerj.10593 (PMC7849524; doi:10.7717/peerj.10593)
Supplement: Supplemental Information 10 — Pathway analysis of upregulated and downregulated DEGs between KC and KR. [file peerj-09-10593-s010.xlsx]

## Sheet: Up-regulated genes
S8 Pathway analysis of upregulated differentially expressed genes (DEGs) between KC and KR group.
pathway_id	pathway_name	Genes	S gene number	TS gene number	B gene number	TB gene number	pvalue	Note: S gene number: the number of significant DEGs which annotated to a specific KEGG pathway; TS gene number: the number of significant DEGs; B gene number: the number of genes which annotated to a specific KEGG pathway; TB gene number: the total number of genes.
5206	MicroRNAs in cancer	LOC102174869;ISM1;LOC102168759	3	21	285	12955	0.0104487
4060	Cytokine-cytokine receptor interaction	CXCL10;IL1RN;LOC102183373	3	21	319	12955	0.0141595
4151	PI3K-Akt signaling pathway	LOC102186358;LOC102183373;ISM1	3	21	422	12955	0.0295255
4623	Cytosolic DNA-sensing pathway	IL1RN;CXCL10	2	21	74	12955	0.00630102
4723	Retrograde endocannabinoid signaling	GRIA1;RIMS1	2	21	111	12955	0.0137387
4620	Toll-like receptor signaling pathway	IL1RN;CXCL10	2	21	146	12955	0.0230253
4390	Hippo signaling pathway	TP53BP2;WISP2	2	21	218	12955	0.0479941
290	Valine, leucine and isoleucine biosynthesis	SDS	1	21	4	12955	0.00646898
72	Synthesis and degradation of ketone bodies	BDH1	1	21	13	12955	0.0208788
650	Butanoate metabolism	BDH1	1	21	29	12955	0.0460061
5164	Influenza A	MSTRG.3067;MSTRG.5275	2	21	251	12955	0.0616727
5033	Nicotine addiction	102171059	1	21	41	12955	0.0644472
4015	Rap1 signaling pathway	102183373;102184352	2	21	285	12955	0.0769962
5205	Proteoglycans in cancer	102184352;MSTRG.1521	2	21	294	12955	0.0812411
4215	Apoptosis - multiple species	102183373	1	21	53	12955	0.0825486
5219	Bladder cancer	102184352	1	21	56	12955	0.0870215
260	Glycine, serine and threonine metabolism	MSTRG.7523	1	21	60	12955	0.0929531
4141	Protein processing in endoplasmic reticulum	MSTRG.3366;MSTRG.975	2	21	329	12955	0.0984219
5202	Transcriptional misregulation in cancer	102169782;102183373	2	21	345	12955	0.106603
270	Cysteine and methionine metabolism	MSTRG.7523	1	21	70	12955	0.107622
4730	Long-term depression	102171059	1	21	70	12955	0.107622
5014	Amyotrophic lateral sclerosis (ALS)	102171059	1	21	76	12955	0.116315
5223	Non-small cell lung cancer	MSTRG.5198	1	21	78	12955	0.119194
4721	Synaptic vesicle cycle	102184538	1	21	80	12955	0.122065
5144	Malaria	102184352	1	21	81	12955	0.123497
4720	Long-term potentiation	102171059	1	21	82	12955	0.124927
5031	Amphetamine addiction	102171059	1	21	83	12955	0.126354
510	N-Glycan biosynthesis	MSTRG.975	1	21	92	12955	0.139102
4622	RIG-I-like receptor signaling pathway	MSTRG.3067	1	21	109	12955	0.162701
1230	Biosynthesis of amino acids	MSTRG.7523	1	21	111	12955	0.165436
4330	Notch signaling pathway	102174743	1	21	117	12955	0.173591
4713	Circadian entrainment	102171059	1	21	118	12955	0.174943
4724	Glutamatergic synapse	102171059	1	21	119	12955	0.176293
5222	Small cell lung cancer	102186543	1	21	120	12955	0.177641
4621	NOD-like receptor signaling pathway	MSTRG.5275	1	21	122	12955	0.180329
4150	mTOR signaling pathway	MSTRG.1521	1	21	131	12955	0.192326
4668	TNF signaling pathway	MSTRG.3067	1	21	139	12955	0.20285
4115	p53 signaling pathway	102184352	1	21	144	12955	0.20936
5132	Salmonella infection	MSTRG.5275	1	21	145	12955	0.210656
4066	HIF-1 signaling pathway	MSTRG.1521	1	21	151	12955	0.21839
4728	Dopaminergic synapse	102171059	1	21	155	12955	0.223506
1200	Carbon metabolism	MSTRG.7523	1	21	165	12955	0.236156
4933	AGE-RAGE signaling pathway in diabetic complications	MSTRG.5275	1	21	175	12955	0.24861
4350	TGF-beta signaling pathway	102184352	1	21	191	12955	0.268134
5322	Systemic lupus erythematosus	102169782	1	21	196	12955	0.274136
4630	Jak-STAT signaling pathway	102186543	1	21	207	12955	0.287175
4062	Chemokine signaling pathway	MSTRG.3067	1	21	212	12955	0.293028
4910	Insulin signaling pathway	MSTRG.1521	1	21	215	12955	0.296518
4512	ECM-receptor interaction	102184352	1	21	221	12955	0.303448
5034	Alcoholism	102169782	1	21	223	12955	0.305743
4931	Insulin resistance	MSTRG.286	1	21	227	12955	0.310313
4722	Neurotrophin signaling pathway	102183373	1	21	241	12955	0.326082
4310	Wnt signaling pathway	102174743	1	21	252	12955	0.338231
4024	cAMP signaling pathway	102171059	1	21	272	12955	0.359786
5168	Herpes simplex virus 1 infection	MSTRG.5275	1	21	307	12955	0.395909
4014	Ras signaling pathway	102183373	1	21	312	12955	0.400908
3013	RNA transport	MSTRG.1338	1	21	316	12955	0.404879
4145	Phagosome	102184352	1	21	323	12955	0.411768
3010	Ribosome	MSTRG.1521	1	21	347	12955	0.434815
4120	Ubiquitin mediated proteolysis	102186543	1	21	352	12955	0.439507
4080	Neuroactive ligand-receptor interaction	102171059	1	21	352	12955	0.439507
5200	Pathways in cancer	102186543	1	21	523	12955	0.579391
4510	Focal adhesion	102184352	1	21	628	12955	0.648067
4010	MAPK signaling pathway	MSTRG.5275	1	21	652	12955	0.66219
ko04931	Insulin resistance	2	70	227	12951	0.348007
ko05211	Renal cell carcinoma	1	70	79	12951	0.349133
ko00980	Metabolism of xenobiotics by cytochrome P450	1	70	79	12951	0.349133
ko05214	Glioma	1	70	83	12951	0.363178
ko00561	Glycerolipid metabolism	1	70	83	12951	0.363178
ko05230	Central carbon metabolism in cancer	1	70	85	12951	0.370088
ko04918	Thyroid hormone synthesis	1	70	87	12951	0.376924
ko04550	Signaling pathways regulating pluripotency of stem cells	2	70	247	12951	0.38697
ko05204	Chemical carcinogenesis	1	70	91	12951	0.390377
ko04261	Adrenergic signaling in cardiomyocytes	2	70	250	12951	0.392734
ko00510	N-Glycan biosynthesis	1	70	92	12951	0.393695
ko05220	Chronic myeloid leukemia	1	70	96	12951	0.406791
ko04971	Gastric acid secretion	1	70	97	12951	0.410022
ko05100	Bacterial invasion of epithelial cells	1	70	98	12951	0.413234
ko00830	Retinol metabolism	1	70	98	12951	0.413234
ko05032	Morphine addiction	1	70	99	12951	0.41643
ko04020	Calcium signaling pathway	2	70	263	12951	0.417429
ko04612	Antigen processing and presentation	1	70	100	12951	0.419609
ko04925	Aldosterone synthesis and secretion	1	70	102	12951	0.425914
ko00140	Steroid hormone biosynthesis	1	70	104	12951	0.432153
ko04391	Hippo signaling pathway -fly	1	70	104	12951	0.432153
ko05133	Pertussis	1	70	105	12951	0.435247
ko04110	Cell cycle	2	70	274	12951	0.437939
ko04320	Dorso-ventral axis formation	1	70	106	12951	0.438324
ko04727	GABAergic synapse	1	70	107	12951	0.441385
ko04211	Longevity regulating pathway - mammal	1	70	107	12951	0.441385
ko04622	RIG-I-like receptor signaling pathway	1	70	109	12951	0.447458
ko04740	Olfactory transduction	2	70	280	12951	0.448966
ko04723	Retrograde endocannabinoid signaling	1	70	111	12951	0.453465
ko05134	Legionellosis	1	70	112	12951	0.456445
ko04725	Cholinergic synapse	1	70	114	12951	0.462356
ko00310	Lysine degradation	1	70	115	12951	0.465288
ko00562	Inositol phosphate metabolism	1	70	115	12951	0.465288
ko04010	MAPK signaling pathway	4	70	652	12951	0.471735
ko04713	Circadian entrainment	1	70	118	12951	0.473989
ko04724	Glutamatergic synapse	1	70	119	12951	0.476858
ko05231	Choline metabolism in cancer	1	70	122	12951	0.485373
ko05410	Hypertrophic cardiomyopathy (HCM)	1	70	122	12951	0.485373
ko04978	Mineral absorption	1	70	125	12951	0.493752
ko04750	Inflammatory mediator regulation of TRP channels	1	70	125	12951	0.493752
ko04914	Progesterone-mediated oocyte maturation	1	70	130	12951	0.507419
ko04150	mTOR signaling pathway	1	70	131	12951	0.510108
ko03013	RNA transport	2	70	316	12951	0.512516
ko04912	GnRH signaling pathway	1	70	132	12951	0.512783
ko04540	Gap junction	1	70	133	12951	0.515444
ko05142	Chagas disease (American trypanosomiasis)	1	70	134	12951	0.51809
ko04145	Phagosome	2	70	323	12951	0.52432
ko04668	TNF signaling pathway	1	70	139	12951	0.531109
ko04916	Melanogenesis	1	70	141	12951	0.536219
ko04620	Toll-like receptor signaling pathway	1	70	146	12951	0.548755
ko04152	AMPK signaling pathway	1	70	146	12951	0.548755
ko05145	Toxoplasmosis	1	70	147	12951	0.551221
ko05160	Hepatitis C	1	70	148	12951	0.553675
ko04970	Salivary secretion	1	70	150	12951	0.558542
ko05202	Transcriptional misregulation in cancers	2	70	345	12951	0.560181
ko04066	HIF-1 signaling pathway	1	70	151	12951	0.560956
ko04976	Bile secretion	1	70	154	12951	0.568121
ko00190	Oxidative phosphorylation	1	70	159	12951	0.579806
ko04012	ErbB signaling pathway	2	70	364	12951	0.589607
ko04610	Complement and coagulation cascades	1	70	167	12951	0.597857
ko04114	Oocyte meiosis	1	70	178	12951	0.621435
ko05161	Hepatitis B	1	70	182	12951	0.629667
ko04350	TGF-beta signaling pathway	1	70	191	12951	0.647548
ko04144	Endocytosis	3	70	631	12951	0.66978
ko04022	cGMP - PKG signaling pathway	1	70	214	12951	0.68947
ko04390	Hippo signaling pathway	1	70	218	12951	0.696241
ko05034	Alcoholism	1	70	223	12951	0.704501
ko04142	Lysosome	1	70	231	12951	0.717258
ko04722	Neurotrophin signaling pathway	1	70	241	12951	0.732443
ko04310	Wnt signaling pathway	1	70	252	12951	0.748219
ko00230	Purine metabolism	1	70	253	12951	0.749607
ko04024	cAMP signaling pathway	1	70	272	12951	0.774589
ko04360	Axon guidance	1	70	274	12951	0.777071
ko05200	Pathways in cancer	2	70	523	12951	0.780531
ko04514	Cell adhesion molecules (CAMs)	1	70	279	12951	0.783159
ko05206	MicroRNAs in cancer	1	70	285	12951	0.790249
ko04015	Rap1 signaling pathway	1	70	285	12951	0.790249
ko03040	Spliceosome	1	70	289	12951	0.794848
ko05168	Herpes simplex infection	1	70	307	12951	0.814344
ko05166	HTLV-I infection	1	70	331	12951	0.837523
ko04120	Ubiquitin mediated proteolysis	1	70	352	12951	0.855448
ko04510	Focal adhesion	2	70	628	12951	0.85993
ko04151	PI3K-Akt signaling pathway	1	70	422	12951	0.902236
ko04810	Regulation of actin cytoskeleton	1	70	619	12951	0.967861

## Sheet: Down-regulated genes
S8 Pathway analysis of downregulated differentially expressed genes (DEGs) between KC and KR group.
pathway_id	pathway_name	Genes	S gene number	TS gene number	B gene number	TB gene number	pvalue	Note: S gene number: the number of significant DEGs which annotated to a specific KEGG pathway; TS gene number: the number of significant DEGs; B gene number: the number of genes which annotated to a specific KEGG pathway; TB gene number: the total number of genes.
20	Citrate cycle (TCA cycle)	SDHC;IDH1	2	25	42	12955	0.00293612
1230	Biosynthesis of amino acids	OTC;IDH1	2	25	111	12955	0.0191958
4540	Gap junction	GJD3;TUBA1C	2	25	133	12955	0.0268984
1200	Carbon metabolism	SDHC;IDH1	2	25	165	12955	0.0399391
4610	Complement and coagulation cascades	C8B;C1S	2	25	167	12955	0.0408209
1210	2-Oxocarboxylic acid metabolism	IDH1	1	25	22	12955	0.0416385
220	Arginine biosynthesis	OTC	1	25	25	12955	0.0471858
4210	Apoptosis	MSTRG.2275;MSTRG.12199	2	25	195	12955	0.0539186
5322	Systemic lupus erythematosus	MSTRG.1262;MSTRG.2623	2	25	196	12955	0.0544112
910	Nitrogen metabolism	MSTRG.7913	1	25	30	12955	0.0563629
5020	Prion diseases	MSTRG.1262	1	25	38	12955	0.0708701
512	Mucin type O-glycan biosynthesis	MSTRG.2102	1	25	39	12955	0.0726684
4977	Vitamin digestion and absorption	102180405	1	25	43	12955	0.0798281
5016	Huntington disease	MSTRG.1723;102169141	2	25	252	12955	0.0843899
4962	Vasopressin-regulated water reabsorption	102191136	1	25	50	12955	0.0922301
480	Glutathione metabolism	MSTRG.796	1	25	69	12955	0.125089
4721	Synaptic vesicle cycle	108635390	1	25	80	12955	0.143588
3010	Ribosome	MSTRG.888;MSTRG.6900	2	25	347	12955	0.14362
4971	Gastric acid secretion	MSTRG.10237	1	25	97	12955	0.17144
5150	Staphylococcus aureus infection	MSTRG.2623	1	25	101	12955	0.177866
5133	Pertussis	MSTRG.2623	1	25	105	12955	0.184244
4978	Mineral absorption	MSTRG.12464	1	25	124	12955	0.213896
3018	RNA degradation	MSTRG.3254	1	25	142	12955	0.241032
4146	Peroxisome	MSTRG.796	1	25	143	12955	0.242513
4115	p53 signaling pathway	MSTRG.8968	1	25	144	12955	0.243991
5146	Amoebiasis	MSTRG.1262	1	25	149	12955	0.25134
4919	Thyroid hormone signaling pathway	MSTRG.1361	1	25	150	12955	0.252801
4970	Salivary secretion	MSTRG.12078	1	25	150	12955	0.252801
4976	Bile secretion	MSTRG.12110	1	25	154	12955	0.25862
190	Oxidative phosphorylation	MSTRG.1723	1	25	159	12955	0.265832
4611	Platelet activation	MSTRG.10237	1	25	166	12955	0.275817
5012	Parkinson disease	MSTRG.1723	1	25	170	12955	0.281463
4932	Non-alcoholic fatty liver disease (NAFLD)	MSTRG.1723	1	25	180	12955	0.295396
4921	Oxytocin signaling pathway	MSTRG.10237	1	25	194	12955	0.314466
4270	Vascular smooth muscle contraction	MSTRG.10237	1	25	211	12955	0.336957
4022	cGMP-PKG signaling pathway	MSTRG.10237	1	25	214	12955	0.340851
4390	Hippo signaling pathway	106502497	1	25	218	12955	0.34601
5010	Alzheimer disease	MSTRG.1723	1	25	225	12955	0.354945
4931	Insulin resistance	MSTRG.1361	1	25	227	12955	0.357476
4142	Lysosome	MSTRG.12199	1	25	231	12955	0.36251
4020	Calcium signaling pathway	MSTRG.10237	1	25	263	12955	0.40144
4145	Phagosome	MSTRG.2275	1	25	323	12955	0.468369
4141	Protein processing in endoplasmic reticulum	MSTRG.10822	1	25	329	12955	0.474652
5202	Transcriptional misregulation in cancer	MSTRG.8968	1	25	345	12955	0.49106
4810	Regulation of actin cytoskeleton	MSTRG.10237	1	25	619	12955	0.70629
4510	Focal adhesion	MSTRG.10237	1	25	628	12955	0.711606
ko00260	Glycine, serine and threonine metabolism	1	89	60	12951	0.339458
ko00760	Nicotinate and nicotinamide metabolism	1	89	60	12951	0.339458
ko04114	Oocyte meiosis	2	89	178	12951	0.346565
ko04672	Intestinal immune network for IgA production	1	89	65	12951	0.361951
ko00520	Amino sugar and nucleotide sugar metabolism	1	89	68	12951	0.375082
ko04730	Long-term depression	1	89	70	12951	0.383686
ko04960	Aldosterone-regulated sodium reabsorption	1	89	71	12951	0.387945
ko05322	Systemic lupus erythematosus	2	89	196	12951	0.391036
ko04974	Protein digestion and absorption	2	89	198	12951	0.3959
ko04950	Maturity onset diabetes of the young	1	89	74	12951	0.400546
ko04650	Natural killer cell mediated cytotoxicity	2	89	201	12951	0.403163
ko00980	Metabolism of xenobiotics by cytochrome P450	1	89	79	12951	0.420981
ko03420	Nucleotide excision repair	2	89	209	12951	0.422329
ko05202	Transcriptional misregulation in cancers	3	89	345	12951	0.424284
ko04910	Insulin signaling pathway	2	89	215	12951	0.436501
ko05031	Amphetamine addiction	1	89	83	12951	0.436831
ko05214	Glioma	1	89	83	12951	0.436831
ko04120	Ubiquitin mediated proteolysis	3	89	352	12951	0.437094
ko04144	Endocytosis	5	89	631	12951	0.43836
ko05218	Melanoma	1	89	84	12951	0.440726
ko00565	Ether lipid metabolism	1	89	91	12951	0.467256
ko05204	Chemical carcinogenesis	1	89	91	12951	0.467256
ko05416	Viral myocarditis	1	89	95	12951	0.481853
ko05200	Pathways in cancer	4	89	523	12951	0.486543
ko05100	Bacterial invasion of epithelial cells	1	89	98	12951	0.492541
ko04612	Antigen processing and presentation	1	89	100	12951	0.499544
ko05150	Staphylococcus aureus infection	1	89	101	12951	0.50301
ko04550	Signaling pathways regulating pluripotency of stem cells	2	89	247	12951	0.508769
ko04391	Hippo signaling pathway -fly	1	89	104	12951	0.513266
ko00140	Steroid hormone biosynthesis	1	89	104	12951	0.513266
ko04211	Longevity regulating pathway - mammal	1	89	107	12951	0.523313
ko04622	RIG-I-like receptor signaling pathway	1	89	109	12951	0.529896
ko01230	Biosynthesis of amino acids	1	89	110	12951	0.533154
ko05169	Epstein-Barr virus infection	2	89	259	12951	0.534305
ko05134	Legionellosis	1	89	112	12951	0.539604
ko04911	Insulin secretion	1	89	115	12951	0.549113
ko05410	Hypertrophic cardiomyopathy (HCM)	1	89	122	12951	0.570551
ko04514	Cell adhesion molecules (CAMs)	2	89	279	12951	0.574844
ko04740	Olfactory transduction	2	89	280	12951	0.576804
ko04750	Inflammatory mediator regulation of TRP channels	1	89	125	12951	0.579428
ko05414	Dilated cardiomyopathy (DCM)	1	89	125	12951	0.579428
ko04660	T cell receptor signaling pathway	1	89	126	12951	0.582346
ko04015	Rap1 signaling pathway	2	89	285	12951	0.586504
ko03008	Ribosome biogenesis in eukaryotes	1	89	129	12951	0.590982
ko04914	Progesterone-mediated oocyte maturation	1	89	130	12951	0.593821
ko03040	Spliceosome	2	89	289	12951	0.594147
ko04150	mTOR signaling pathway	1	89	131	12951	0.596641
ko04912	GnRH signaling pathway	1	89	132	12951	0.599441
ko04540	Gap junction	1	89	133	12951	0.602222
ko04922	Glucagon signaling pathway	1	89	134	12951	0.604984
ko04640	Hematopoietic cell lineage	1	89	135	12951	0.607727
ko05203	Viral carcinogenesis	2	89	304	12951	0.621881
ko05168	Herpes simplex infection	2	89	307	12951	0.627252
ko04146	Peroxisome	1	89	143	12951	0.629003
ko04014	Ras signaling pathway	2	89	312	12951	0.636075
ko04670	Leukocyte transendothelial migration	1	89	146	12951	0.636684
ko03013	RNA transport	2	89	316	12951	0.643016
ko04970	Salivary secretion	1	89	150	12951	0.646681
ko04919	Thyroid hormone signaling pathway	1	89	150	12951	0.646681
ko04726	Serotonergic synapse	1	89	150	12951	0.646681
ko00240	Pyrimidine metabolism	1	89	151	12951	0.649137
ko04145	Phagosome	2	89	323	12951	0.654916
ko04141	Protein processing in endoplasmic reticulum	2	89	329	12951	0.664867
ko05166	HTLV-I infection	2	89	331	12951	0.668133
ko04380	Osteoclast differentiation	1	89	162	12951	0.675069
ko04611	Platelet activation	1	89	166	12951	0.684021
ko04610	Complement and coagulation cascades	1	89	167	12951	0.686221
ko04072	Phospholipase D signaling pathway	1	89	171	12951	0.694869
ko04530	Tight junction	2	89	354	12951	0.703891
ko04070	Phosphatidylinositol signaling system	1	89	178	12951	0.709439
ko05161	Hepatitis B	1	89	182	12951	0.717454
ko04350	TGF-beta signaling pathway	1	89	191	12951	0.734698
ko04210	Apoptosis	1	89	195	12951	0.742023
ko04062	Chemokine signaling pathway	1	89	212	12951	0.770989
ko04022	cGMP - PKG signaling pathway	1	89	214	12951	0.774178
ko04390	Hippo signaling pathway	1	89	218	12951	0.780425
ko04512	ECM-receptor interaction	1	89	221	12951	0.784997
ko05034	Alcoholism	1	89	223	12951	0.787993
ko05010	Alzheimer's disease	1	89	225	12951	0.790948
ko04931	Insulin resistance	1	89	227	12951	0.793862
ko04722	Neurotrophin signaling pathway	1	89	241	12951	0.813165
ko04261	Adrenergic signaling in cardiomyocytes	1	89	250	12951	0.824619
ko05164	Influenza A	1	89	251	12951	0.825847
ko04310	Wnt signaling pathway	1	89	252	12951	0.827068
ko00230	Purine metabolism	1	89	253	12951	0.82828
ko04020	Calcium signaling pathway	1	89	263	12951	0.839947
ko04068	FoxO signaling pathway	1	89	272	12951	0.849775
ko04024	cAMP signaling pathway	1	89	272	12951	0.849775
ko04110	Cell cycle	1	89	274	12951	0.851877
ko04060	Cytokine-cytokine receptor interaction	1	89	319	12951	0.892182
ko03010	Ribosome	1	89	347	12951	0.911566
ko04080	Neuroactive ligand-receptor interaction	1	89	352	12951	0.914645
ko04012	ErbB signaling pathway	1	89	364	12951	0.921608
ko04510	Focal adhesion	2	89	628	12951	0.93427
ko04010	MAPK signaling pathway	2	89	652	12951	0.942951
ko04151	PI3K-Akt signaling pathway	1	89	422	12951	0.948105
