# Supplementary material for: Transcriptome analysis reveals liver metabolism programming in kids from nutritional restricted goats during mid-gestation
Source: PeerJ. 2021 Jan 29;9:e10593. doi: 10.7717/peerj.10593 (PMC7849524; doi:10.7717/peerj.10593)
Supplement: Supplemental Information 11 — FPKM value of carbohydrate metabolism-related genes, lipid metabolism-related genes, and cellular energy metabolism-related genes in all groups. [file peerj-09-10593-s011.xlsx]

## Sheet: Carbohydrate metabolism
S9 FPKM value of carbohydrate metabolism-related genes
gene_name	FPKM.KID_CON2	FPKM.KID_CON3	FPKM.KID_CON4	KID_CON_Average	SD	FPKM.KID_RES1	FPKM.KID_RES2	FPKM.KID_RES3	FPKM.KID_RES4	KID_RES_Average	SD	FPKM.FET_CON1	FPKM.FET_CON2	FPKM.FET_CON3	FPKM.FET_CON4	FPKM.FET_CON5	FET_CON_Average	SD	FPKM.FET_RES1	FPKM.FET_RES2	FPKM.FET_RES4	FPKM.FET_RES5	FET_RES_Average	SD
DPH3	3.32459	3.0857	3.27324	3.22784	0.102675	2.91703	2.67141	3.95236	4.76858	3.57735	0.839109	3.75152	4.38925	4.24258	4.13119	4.21598	4.14611	0.214115	2.81034	3.48545	3.64739	2.97037	3.22839	0.347486
FBP1	67.616	78.0984	109.161	84.9585	17.6408	137.233	160.206	127.706	94.2065	129.838	23.7226	37.7072	41.0408	55.1709	44.3425	31.0128	41.8548	7.98648	63.9019	41.2379	39.0499	48.7649	48.2386	9.73469
FBP2	1.4478	1.62584	3.55154	2.20839	0.952525	5.43207	3.89948	7.59917	0.591443	4.38054	2.55215	0.406812	1.16067	0.405464	1.37033	0.587623	0.786181	0.402435	3.85825	1.43602	0.488172	0.736374	1.6297	1.33276
G6PC	23.5185	26.6986	38.0065	29.4079	6.21718	49.4039	39.6202	60.1092	35.4189	46.1381	9.52943	1.84846	2.1081	1.07069	0.970233	1.09093	1.41768	0.466823	7.71061	0.75452	1.05583	0.501482	2.50561	3.01151
G6PC3	6.94764	7.28986	4.43352	6.22367	1.27352	6.53106	5.66209	4.21138	7.66971	6.01856	1.26312	75.6862	75.8539	95.8487	121.332	97.9647	93.337	16.9035	104.2	105.728	116.771	83.2781	102.494	12.1084
PC	17.3863	37.0756	62.2386	38.9002	18.3563	58.2381	60.374	86.6762	116.688	80.4941	23.7084	20.0356	22.5643	23.2231	15.4459	19.0661	20.067	2.77686	14.7191	17.771	23.8098	14.387	17.6717	3.78128
PCK1	340.228	446.721	368.123	385.024	45.088	210.683	400.306	304.138	302.13	304.314	67.0562	3.58787	7.40253	3.75619	4.11429	6.80773	5.13372	1.6295	8.72089	0.870048	0.683631	0.386005	2.66514	3.50054
PCK2	54.2544	45.7301	92.6355	64.2067	20.4012	78.3209	54.9498	55.7162	48.9438	59.4827	11.1879	19.2307	18.2649	18.5781	23.2821	12.9751	18.4662	3.2858	18.2379	16.6052	15.7211	21.4314	17.9989	2.17773

## Sheet: Lipid metabolism
S9 FPKM value of lipid metabolism-related genes
gene_name	FPKM.KID_CON2	FPKM.KID_CON3	FPKM.KID_CON4	KID_CON_Average	SD	FPKM.KID_RES1	FPKM.KID_RES2	FPKM.KID_RES3	FPKM.KID_RES4	KID_RES_Average	SD	FPKM.FET_CON1	FPKM.FET_CON2	FPKM.FET_CON3	FPKM.FET_CON4	FPKM.FET_CON5	FET_CON_Average	SD	FPKM.FET_RES1	FPKM.FET_RES2	FPKM.FET_RES4	FPKM.FET_RES5	FET_RES_Average	SD
ACACA	1.53851	1.54799	1.31773	1.46808	0.106379	1.66331	2.45965	2.60024	3.55966	2.57072	0.673538	4.02022	3.63963	3.73024	2.63164	3.68867	3.54208	0.474115	5.05618	3.42128	3.7877	2.97212	3.80932	0.775662
ACACB	6.92345	6.64044	22.7167	12.0935	7.5126	21.4844	10.797	9.38661	15.7722	14.36	4.7482	0.41236	0.323434	0.509013	0.840041	0.683084	0.553587	0.186401	0.68013	0.310016	0.59693	0.203013	0.447522	0.196928
ACAD9	22.415	15.3646	23.7324	20.504	3.67371	24.5989	19.8382	17.8858	24.0492	21.593	2.82359	21.7438	17.3942	17.6203	28.9845	23.1821	21.785	4.2523	15.7903	22.0687	21.919	26.6164	21.5986	3.84833
ANGPTL3	174.917	215.921	284.657	225.165	45.2757	142.065	155.685	207.4	119.716	156.217	32.2202	65.715	76.4202	65.9866	47.4488	49.3166	60.9774	11.0001	60.7743	51.4882	59.6821	69.1359	60.2701	6.25146
ANGPTL4	10.8157	6.84166	43.6281	20.4285	16.4846	16.4814	16.9004	45.2111	8.40321	21.749	13.9628	2.86054	2.99738	2.11842	2.37584	2.03647	2.47773	0.387498	1.64141	1.93883	2.94391	2.55491	2.26976	0.509933
CPT1C	1.20333	1.00852	1.46938	1.22708	0.188897	1.45094	1.00438	1.1949	1.73035	1.34514	0.273072	2.43612	2.59095	2.93474	3.89965	2.97865	2.96802	0.508774	2.77401	3.12727	3.5196	2.35948	2.94509	0.428794
FABP1	647.744	535.42	484.559	555.908	68.177	745.758	497.856	368.776	545.948	539.585	135.522	596.48	367.052	298.635	325.406	609.142	439.343	135.3	252.907	209.401	333.71	250.011	261.507	45.0954
FABP3	0.876536	0.787518	1.62873	1.09759	0.377322	1.39164	1.28147	2.29279	1.60245	1.64209	0.392983	2.81061	1.02682	1.80638	1.96859	2.51249	2.02498	0.616793	1.49194	2.14866	2.24854	1.65679	1.88648	0.319471
FABP5	0.777552	1.0741	1.52779	1.12648	0.308516	1.31162	0.68591	3.56799	0.691606	1.56428	1.18446	17.5707	15.5083	14.3169	9.76492	14.4672	14.3256	2.55928	7.4415	11.3422	9.07991	15.2649	10.7821	2.9354
FABP6	0.093582	0.044676	0.144598	0.0942853	0.040796	0.316466	0.063747	0.279198	0.092314	0.187931	0.111148	0.092642	0.1326	0.237432	0.133409	0.316979	0.182612	0.0825548	0.138104	0.152442	0.430848	0.091642	0.203259	0.133307
FABP7	0.425704	0.169264	0.230446	0.275138	0.109357	0.735313	0.189007	0.688637	0.126244	0.4348	0.278551	0.930316	0.708999	0.443626	2.3053	0.331987	0.944046	0.711827	0.492456	0.06596	0.052318	0.290129	0.225216	0.180892
FADS1	50.5112	58.2007	28.7801	45.8307	12.4586	25.0124	41.3534	35.4578	47.9196	37.4358	8.4189	21.5411	20.0419	19.0349	16.5573	22.7554	19.9861	2.13315	13.4613	10.2794	18.726	16.8392	14.8265	3.23255
FADS2	58.6969	56.5688	24.7646	46.6768	15.5186	25.8965	43.3946	39.0726	36.6366	36.2501	6.44899	20.7609	19.3235	18.4777	15.5553	14.6777	17.759	2.29465	12.0069	10.7897	17.0152	16.1683	13.995	2.64911
FADS6	82.6022	89.0351	71.875	81.1708	7.07834	60.5206	73.0374	47.4407	67.4954	62.1235	9.56719	17.565	15.4041	15.7644	9.89491	18.1717	15.36	2.92576	9.06674	13.3611	14.6868	18.1186	13.8083	3.24165
HMGCS1	59.9894	11.2226	7.52774	26.2466	23.9074	12.4238	15.8035	35.8111	26.042	22.5201	9.16656	24.0347	20.2736	21.1805	31.266	23.54	24.059	3.86849	26.1522	16.5939	25.1549	28.313	24.0535	4.45552
HMGCS2	89.5484	128.464	149.965	122.659	25.0043	51.6826	246.315	150.469	53.7095	125.544	80.3471	4.23158	6.16431	5.74344	3.3074	3.88619	4.66658	1.09986	7.13273	2.42733	5.75297	8.79461	6.02691	2.34068
LIPT1	4.51286	3.21696	3.63528	3.78837	0.540008	3.08405	3.96047	4.14728	3.52977	3.68039	0.410715	4.17065	3.9378	4.72877	4.16589	3.54773	4.11017	0.383531	4.03276	2.21329	3.63201	4.63494	3.62825	0.891513
SCD	44.8438	41.1781	47.2978	44.4399	2.51466	45.3982	39.9239	47.3501	28.7966	40.3672	7.21365	62.9107	66.6078	63.7183	57.2885	57.2791	61.5609	3.70231	44.7215	54.6262	63.3193	58.023	55.1725	6.78268
SCD5	0.234859	0.381454	0.425283	0.347199	0.0814264	0.335553	0.359395	0.723739	0.274282	0.423242	0.176248	0.367967	0.749648	0.83321	0.666846	3.09399	1.14233	0.988377	0.687556	1.37775	4.20247	0.428032	1.67395	1.50053
PPARG	0.309909	0.810037	0.650489	0.590145	0.208587	1.60644	0.401094	1.03974	0.786708	0.958495	0.437789	1.52532	0.717883	0.836896	0.617471	0.47598	0.834711	0.365097	0.720815	0.833659	0.734228	0.514798	0.700875	0.115938
PPARGC1A	1.81319	3.04241	3.30788	2.72116	0.651115	4.84658	5.0716	4.726	2.83361	4.36945	0.895348	1.14344	1.79892	1.68059	1.20859	1.67233	1.50077	0.269708	2.40166	1.68968	1.51822	0.941447	1.63775	0.520908
PPARGC1B	0.179174	0.276793	0.278033	0.244667	0.0463131	0.107175	0.399384	0.415369	0.265229	0.296789	0.124033	0.242594	0.088916	0.091369	0.130405	0.126781	0.136013	0.0560132	0.101172	0.05661	0.079799	0.130547	0.092032	0.0272549
SREBF1	9.89253	11.4109	9.49287	10.2654	0.826242	18.5621	12.3012	11.1666	14.3668	14.0992	2.82053	23.0618	20.0377	18.0271	27.5629	20.441	21.8261	3.28594	17.4819	17.3558	22.1601	14.5567	17.8886	2.72932
FASN	17.3778	5.62408	2.12323	8.37503	6.52436	3.95962	4.01061	7.11966	7.89619	5.74652	1.78276	36.2735	30.0728	29.8162	45.0555	32.0983	34.6633	5.68748	24.4323	31.5686	33.4488	32.0168	30.3666	3.49586
LPL	0.274463	0.326184	0.094282	0.231643	0.0993975	0.380898	0.296436	0.79036	0.133964	0.400414	0.241995	2.52956	1.49032	1.43439	0.555892	2.29051	1.66013	0.700346	1.55671	1.4983	1.282	1.504	1.46025	0.1054

## Sheet: Cellular energy metabolism
S9 FPKM value of cellular energy metabolism-related genes
gene_name	FPKM.KID_CON2	FPKM.KID_CON3	FPKM.KID_CON4	KID_CON_Average	SD	FPKM.KID_RES1	FPKM.KID_RES2	FPKM.KID_RES3	FPKM.KID_RES4	KID_RES_Average	SD	FPKM.FET_CON1	FPKM.FET_CON2	FPKM.FET_CON3	FPKM.FET_CON4	FPKM.FET_CON5	FET_CON_Average	SD	FPKM.FET_RES1	FPKM.FET_RES2	FPKM.FET_RES4	FPKM.FET_RES5	FET_RES_Average	SD
ATP5A1	61.2987	69.9537	90.5757	73.9427	12.2806	53.2921	92.3602	121.943	40.8806	77.1189	32.103	72.5405	64.3836	69.826	46.4204	40.9228	58.8187	12.7624	39.814	46.5884	53.0845	73.6349	53.2805	12.6537
ATP5B	61.6261	92.5852	147.242	100.484	35.396	48.3378	128.727	174.055	36.2448	96.8413	57.0158	82.3277	61.3543	76.0134	37.3352	45.4038	60.4869	17.2183	32.8474	48.4743	60.4275	82.8752	56.1561	18.2651
ATP5C1	48.7346	71.105	61.4564	60.432	9.16137	47.9359	61.5494	73.3394	33.9483	54.1932	14.7454	70.5347	65.8288	72.5128	45.1289	59.3899	62.679	9.87077	34.662	47.6008	50.7322	69.9337	50.7322	12.617
ATP5D	146.284	135.901	160.339	147.508	10.0143	123.08	168.961	104.744	124.951	130.434	23.6031	114.679	107.193	120.9	88.2381	82.3059	102.663	14.9666	66.1808	75.2952	90.5815	108.755	85.2033	16.1528
ATP5E	365.136	284.741	259.868	303.248	44.9242	338.492	312.074	261.735	233.841	286.536	41.0595	535.877	530.635	772.647	517.734	639.808	599.34	97.0365	479.284	533.636	503.015	495.364	502.825	19.7433
ATP5F1	75.1388	82.2934	91.793	83.0751	6.82149	52.4476	94.6833	89.7443	38.4466	68.8304	23.9653	61.3079	63.8945	62.347	46.1609	55.5724	57.8565	6.48902	41.2952	54.0479	68.0161	74.6021	59.4903	12.8621
ATP5G1	93.2121	84.0294	79.8815	85.7077	5.57011	68.8908	99.5841	79.7209	95.9117	86.0269	12.3988	84.008	71.1939	77.868	55.8377	83.1954	74.4206	10.3589	56.8196	78.7336	76.5559	104.479	79.1471	16.9347
ATP5G2	85.5325	119.611	126.658	110.6	17.9577	82.6251	121.813	106.607	78.9911	97.5092	17.592	132.411	132.915	123.491	69.1906	113.117	114.225	23.6442	63.2709	104.015	102.929	135.159	101.344	25.5082
ATP5G3	25.8016	36.2244	43.8149	35.2803	7.38413	24.9447	50.3985	50.0612	21.7016	36.7765	13.5026	44.5558	29.9562	33.8907	25.6104	28.3404	32.4707	6.61077	22.4681	23.51	35.148	37.6299	29.689	6.76721
ATP5H	124.302	132.16	122.181	126.214	4.29267	121.16	107.765	108.19	119.552	114.167	6.21696	112.931	111.974	110.848	103.286	131.449	114.098	9.32093	89.0092	103.903	98.2904	113.478	101.17	8.87582
ATP5J	130.658	109.064	97.4965	112.406	13.7428	138.083	122.759	118.524	125.369	126.184	7.29153	124.917	128.583	125.77	134.158	139.734	130.633	5.58163	129.68	145.205	145.248	154.227	143.59	8.83182
ATP5J2	177.302	121.484	115.454	138.08	27.8434	219.995	128.698	93.8778	218.89	165.365	55.4623	187.191	209.569	222.377	257.169	291.445	233.55	36.7662	236.818	278.484	230.053	230.653	244.002	20.0836
ATP5L	50.1778	48.7918	52.0488	50.3395	1.3346	50.9438	64.12	47.2117	37.0608	49.8341	9.68698	49.4933	46.9426	49.2615	36.0207	36.1376	43.5711	6.18203	31.4856	37.4596	44.859	45.1714	39.7439	5.67975
ATP5O	66.052	75.9822	84.6841	75.5728	7.61205	71.3582	81.986	87.8971	40.2689	70.3775	18.3656	56.1894	54.911	60.2202	38.4522	45.4469	51.0439	7.94372	30.8405	42.7133	54.3527	67.9349	48.9603	13.752
PCNA	5.47136	4.86571	6.18081	5.50596	0.537443	3.41738	6.79132	11.3434	1.63186	5.79598	3.70006	26.0443	46.0098	29.052	21.4325	16.8434	27.8764	9.96805	21.0084	31.5529	24.434	25.7232	25.6796	3.80359
PPARA	2.3499	2.44539	3.19712	2.66414	0.37889	2.149	3.34004	2.6179	2.61425	2.6803	0.425969	2.60142	0.654594	2.50274	2.27218	0.400353	1.68626	0.955546	0.303601	2.25665	2.05879	10.035	3.66351	3.75631
PPARD	6.03826	5.44515	5.58276	5.68872	0.253465	4.99429	4.53051	6.71758	7.46569	5.92702	1.20548	13.7469	9.11597	8.55351	11.0482	10.856	10.6641	1.81874	8.66604	10.3908	10.2352	9.76767	9.76491	0.674607
